# Supplementary material for: Computational study on Pd-catalyzed ipso , meta -dimethylation of ortho -substituted iodoarenes: mechanisms and the role of the base
Source: Royal Society of Chemistry journal article supplement (doi:10.1039/d4qo02168a), 2025-01-01
Supplement: d4qo02168a1.pdf [file d4qo02168a1.pdf]

**Computational Study on Pd-Catalyzed *ipso,meta*-Dimethylation of *ortho*-  
Substituted Iodoarene: Mechanisms and the Role of Base**

*Supporting Information*

*Kang Lv*<sup>†</sup>, *Jing Zhang*<sup>†,\*</sup>, *Yihang Zhou*<sup>†</sup>, *Zitong Meng*<sup>‡</sup>, *Tao Liu*<sup>†,‡,\*</sup>

<sup>†</sup> School of Chemistry, Chemical Engineering and Materials, Jining University, Qufu 273155, China

<sup>‡</sup> School of Chemistry and Chemical Engineering, Qufu Normal University, Qufu 273165, Shandong, China

*Correspondent author email address: zj810810@163.com and liutao\_2005@126.com*

## Table of content

|                                                                                                                                                                                |          |
|--------------------------------------------------------------------------------------------------------------------------------------------------------------------------------|----------|
| Scheme S1. Some possible Pd <sup>0</sup> initial species.                                                                                                                      | Page S3  |
| Scheme S2. Less favored transition states for some elementary steps in the presence of K <sub>2</sub> CO <sub>3</sub> (I).                                                     | Page S3  |
| Scheme S3. Less favored transition states for some elementary steps in the presence of K <sub>2</sub> CO <sub>3</sub> (II).                                                    | Page S3  |
| Scheme S4. Less favored transition states for some elementary steps in the presence of K <sub>2</sub> CO <sub>3</sub> (III).                                                   | Page S4  |
| Scheme S5. Less favored transition states for some elementary steps in the presence of K <sub>2</sub> CO <sub>3</sub> (IV).                                                    | Page S4  |
| Scheme S6. Transition states for the alkylPd(II) species <b>29</b> protonation by KHCO <sub>3</sub> .                                                                          | Page S5  |
| Figure S1. Optimized geometries of the key transition states in the presence of K <sub>2</sub> CO <sub>3</sub> .                                                               | Page S5  |
| Figure S2. Optimized geometries of the key transition states in the presence of KOAc.                                                                                          | Page S6  |
| Figure S3. The aryl-I oxidative addition and methoxyl C-H activation steps in the presence of KOAc.                                                                            | Page S6  |
| Figure S4. The first methylation process from palladacycle(II) <b>45</b> .                                                                                                     | Page S7  |
| Figure S5. The second methylation process from mono-methylated intermediate <b>54</b> .                                                                                        | Page S7  |
| Scheme S7. Less favored transition states for some elementary steps in the presence of KOAc (I).                                                                               | Page S 7 |
| Scheme S8. Less favored transition states for some elementary steps in the presence of KOAc (II).                                                                              | Page S8  |
| Scheme S9. Less favored transition states for some elementary steps in the presence of KOAc (III).                                                                             | Page S8  |
| Scheme S10. Less favored transition states for some elementary steps in the presence of KOAc (IV).                                                                             | Page S9  |
| Scheme S11. Transition states for the alkylPd(II) species <b>66</b> protonation by HOAc.                                                                                       | Page S9  |
| Figure S6. The calculated $\Delta\Delta G$ of key intermediates and transition states using different density functionals.                                                     | Page S10 |
| Figure S7. The calculated $\Delta\Delta G$ of key intermediates and transition states that were optimized in the solution phase (solvent = DMAc) with the SMD solvation model. | Page S11 |
| Table 1. Absolute calculation energies, enthalpies, and free energies.                                                                                                         | Page S12 |
| Table 2. B3LYP-D3 geometries for all the optimized compounds and transition states.                                                                                            | Page S18 |
| Table3. Cartesian Coordinates and Energies for key intermediates and transition states using different DFT functionals                                                         | Page S88 |

**Scheme S1.** Some possible Pd<sup>0</sup> initial species. The free energies (enthalpies) are given in kcal/mol, where the energy of **cat0** is the zero-energy reference point.

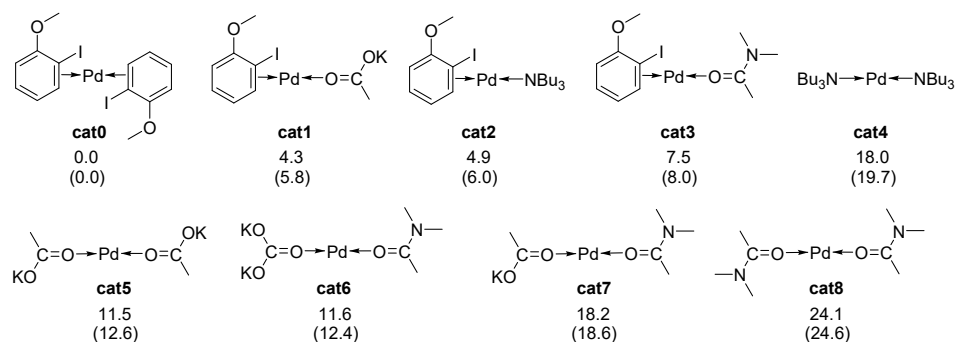

**Scheme S2.** Calculated relative free energies (enthalpies) of less favored transition states for the methoxyl C(sp<sup>3</sup>)-H activation, first CH<sub>3</sub>-I oxidative addition and first Ar-C reductive elimination in the presence of K<sub>2</sub>CO<sub>3</sub>. The free energies (enthalpies) are given in kcal/mol.

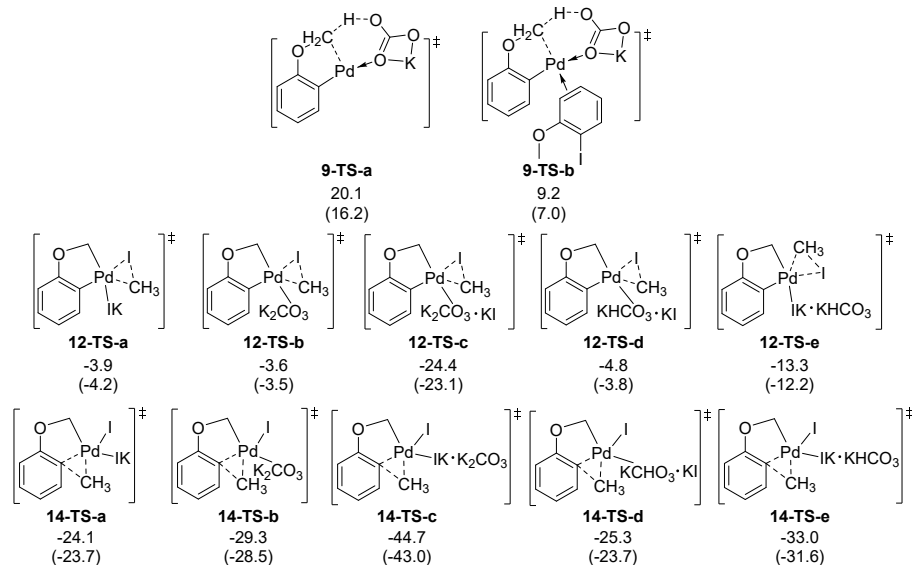

**Scheme S3.** Calculated relative free energies (enthalpies) of less favored transition states for the aryl C-H activation, second CH<sub>3</sub>-I oxidative addition, and second Ar-C reductive elimination in the presence of K<sub>2</sub>CO<sub>3</sub>. The free energies (enthalpies) are given in kcal/mol.

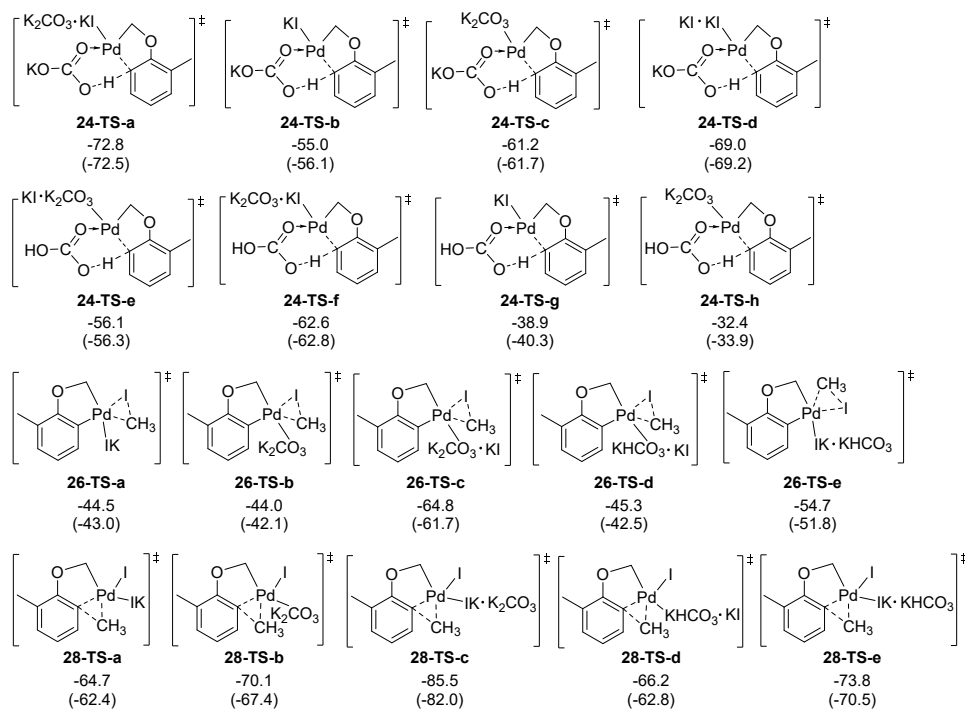

**Scheme S4.** Calculated relative free energies (enthalpies) of less favored transition states for the concerted hydride transfer and C–hydride reductive elimination before the proton transfer, the hydrogen transfer and C–hydride reductive elimination in the presence of  $K_2CO_3$ . The free energies (enthalpies) are given in kcal/mol.

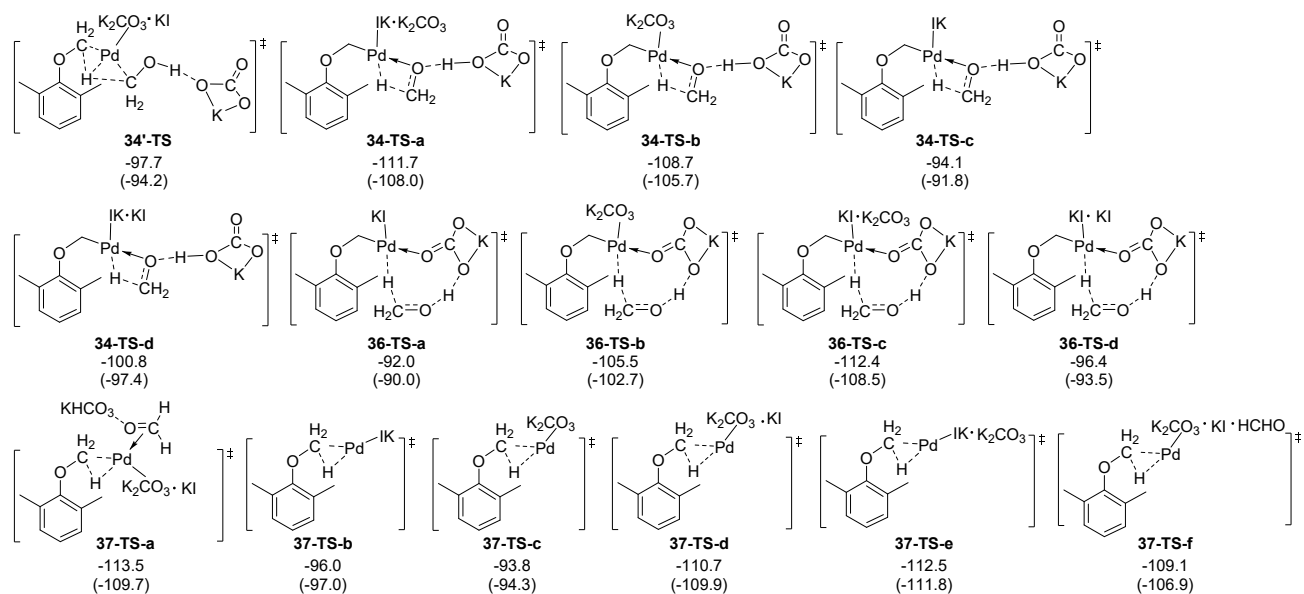

**Scheme S5.** Calculated relative free energies (enthalpies) of less favored transition states for the third C–H activation and C–C reductive elimination in the presence of  $K_2CO_3$ . The free energies (enthalpies) are given in kcal/mol.

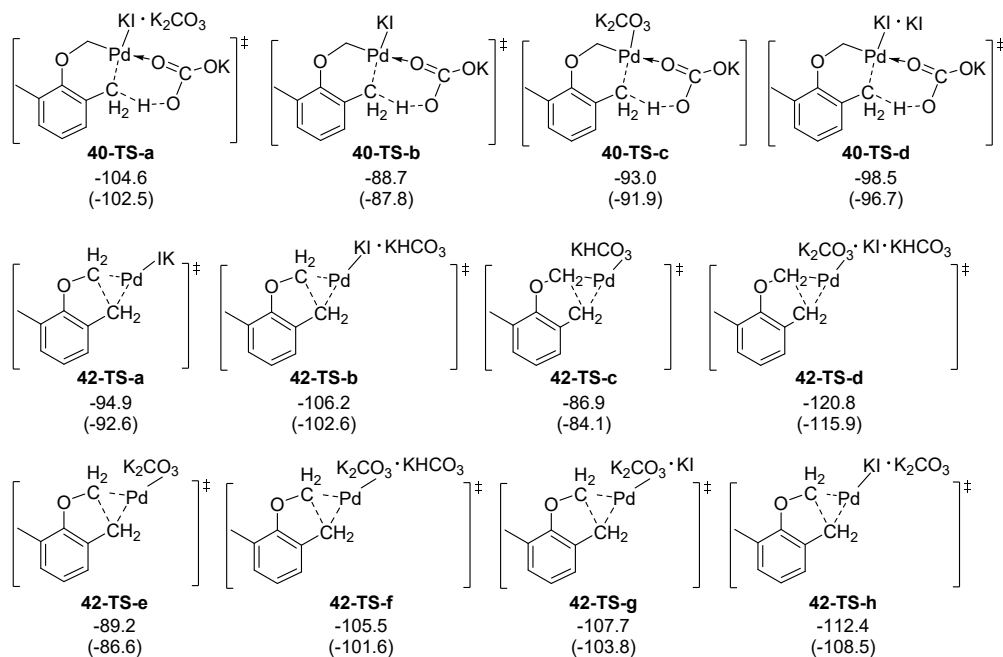

**Scheme S6.** Calculated relative free energies (enthalpies) of transition states for the alkyPd(II) species **29** protonation by KHCO<sub>3</sub> in the presence of K<sub>2</sub>CO<sub>3</sub>. The free energies (enthalpies) are given in kcal/mol.

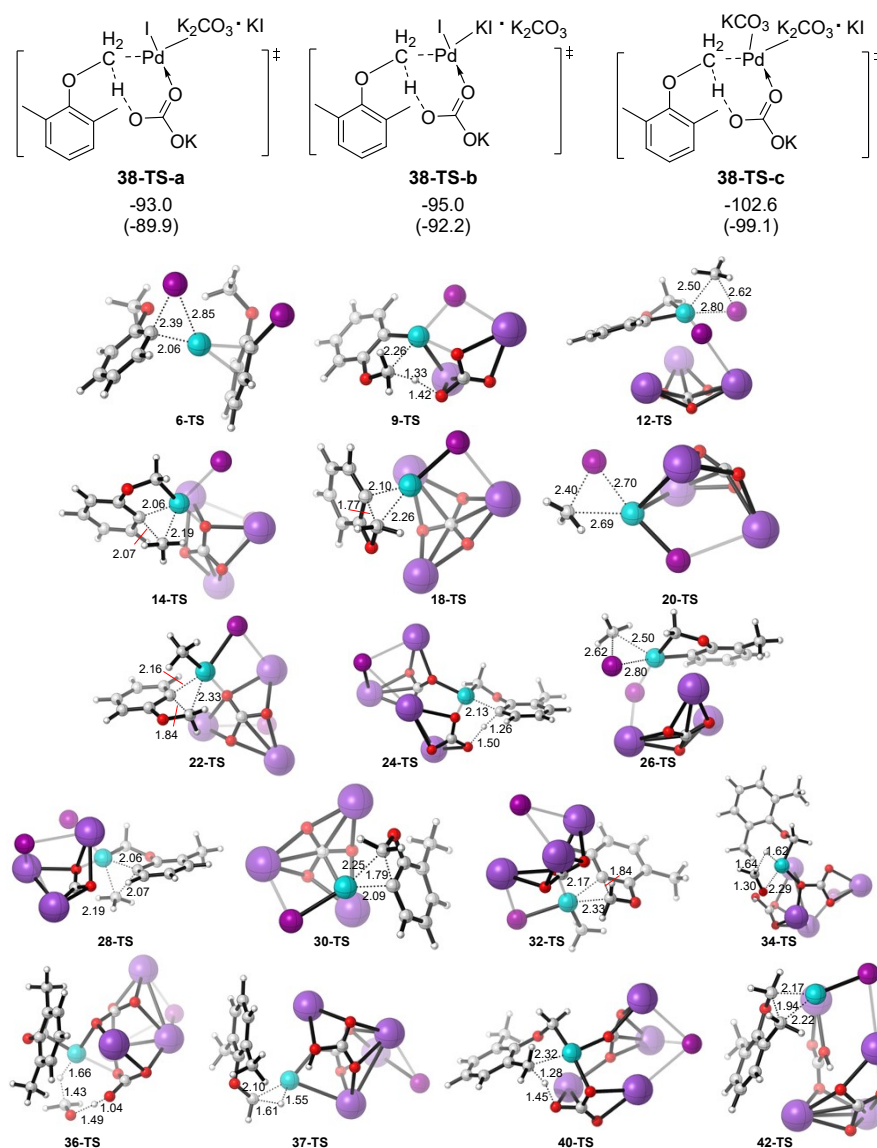

**Figure S1.** Optimized geometries of the key transition states in the presence of K<sub>2</sub>CO<sub>3</sub>. Bond

lengths are given in angstroms.

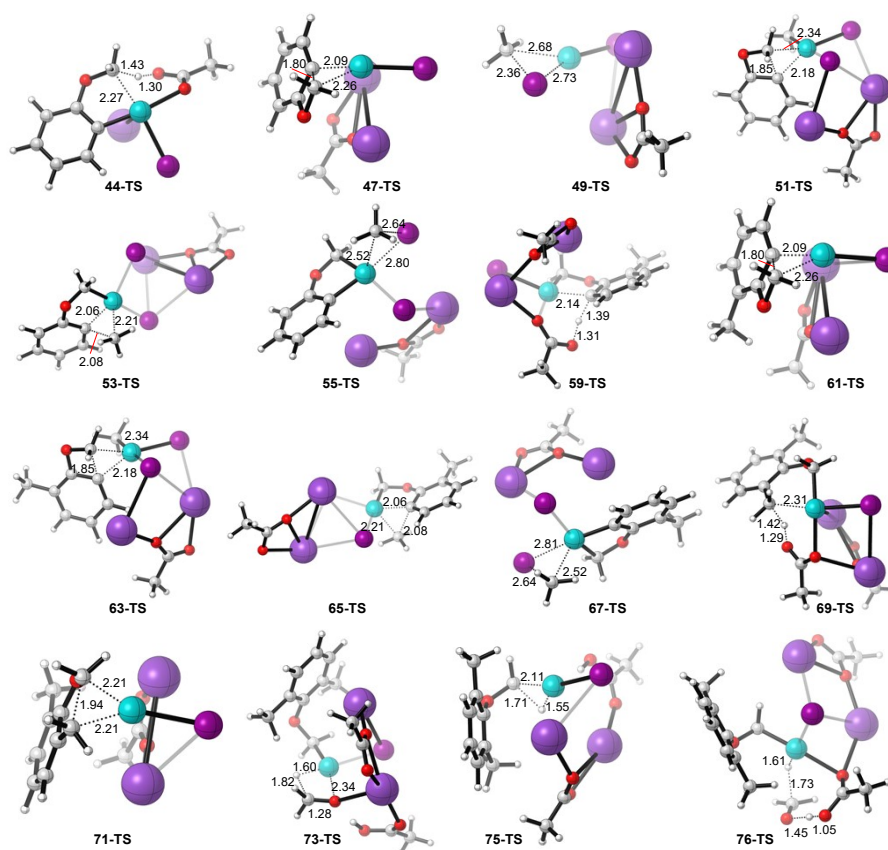

Figure S2. Optimized geometries of the key transition states in the presence of KOAc. Bond lengths are given in angstroms.

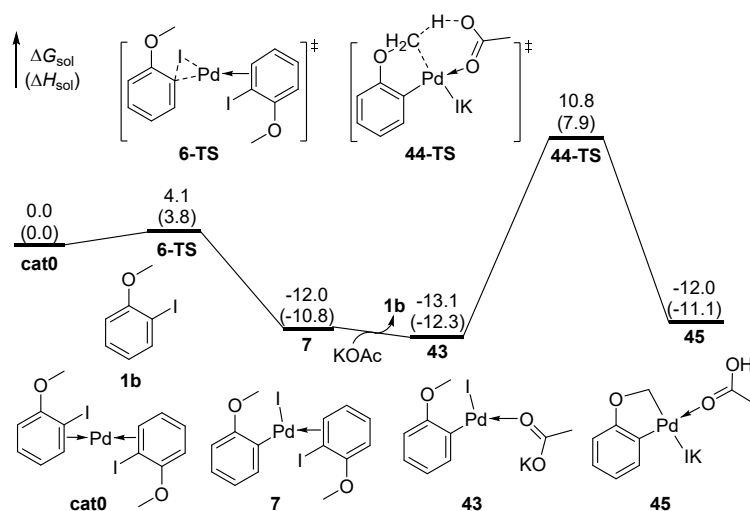

Figure S3. Calculated energy profile of the aryl-I oxidative addition and methoxyl C-H activation in Pd-catalyzed dimethylation of 1b in the presence of KOAc (in kcal/mol).

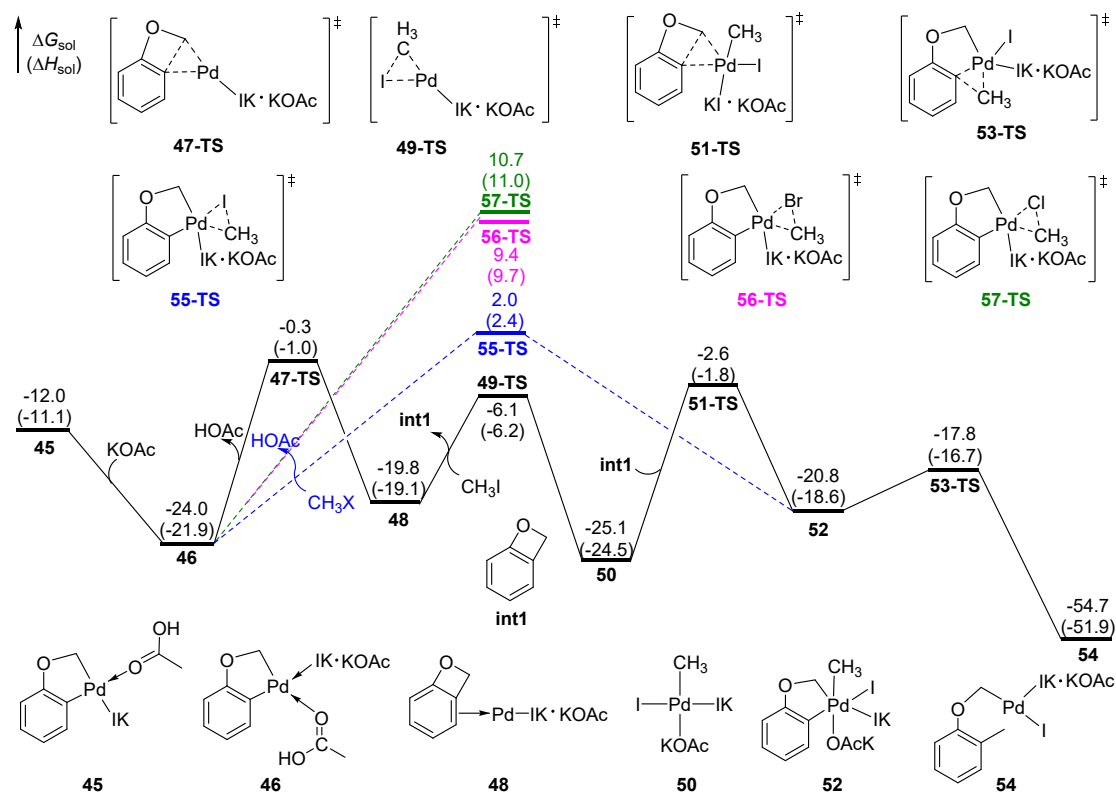

**Figure S4.** Calculated energy profiles of the first  $\text{CH}_3\text{-X}$  oxidative addition (Ar-C reductive elimination,  $\text{CH}_3\text{-I}$  oxidative addition, and Ar-C oxidative addition) and first Ar-C reductive elimination in Pd-catalyzed dimethylation of 1b in the presence of KOAc (in kcal/mol).

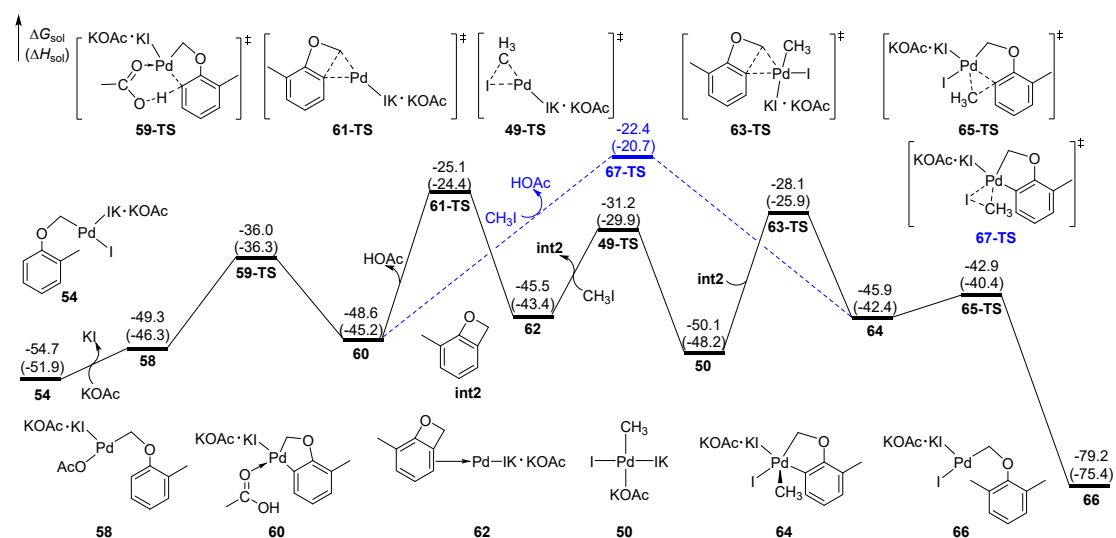

**Figure S5.** Calculated energy profiles of the aryl C-H activation, second  $\text{CH}_3\text{-I}$  oxidative addition (Ar-C reductive elimination,  $\text{CH}_3\text{-I}$  oxidative addition, and Ar-C oxidative addition) and second Ar-C reductive elimination in Pd-catalyzed dimethylation of 1b in the presence of KOAc (in kcal/mol).

**Scheme S7.** Calculated relative free energies (enthalpies) of less favored transition states for the first  $\text{CH}_3\text{-I}$  oxidative addition and first Ar-C reductive elimination in the presence of KOAc. The free energies (enthalpies) are given in kcal/mol.

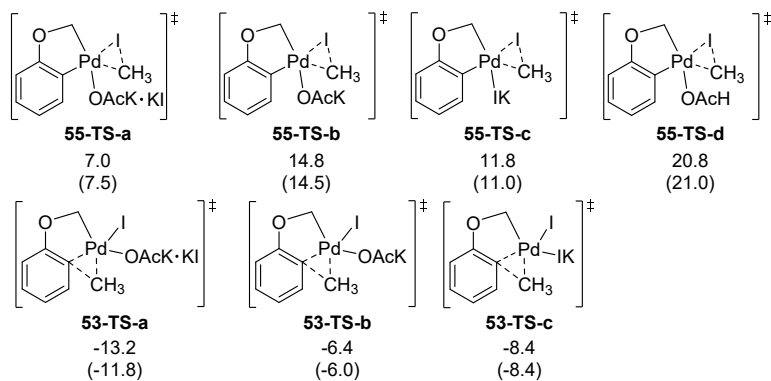

**Scheme S8.** Calculated relative free energies (enthalpies) of less favored transition states for the aryl C–H activation, second CH<sub>3</sub>–I oxidative addition, and second Ar–C reductive elimination in the presence of KOAc. The free energies (enthalpies) are given in kcal/mol.

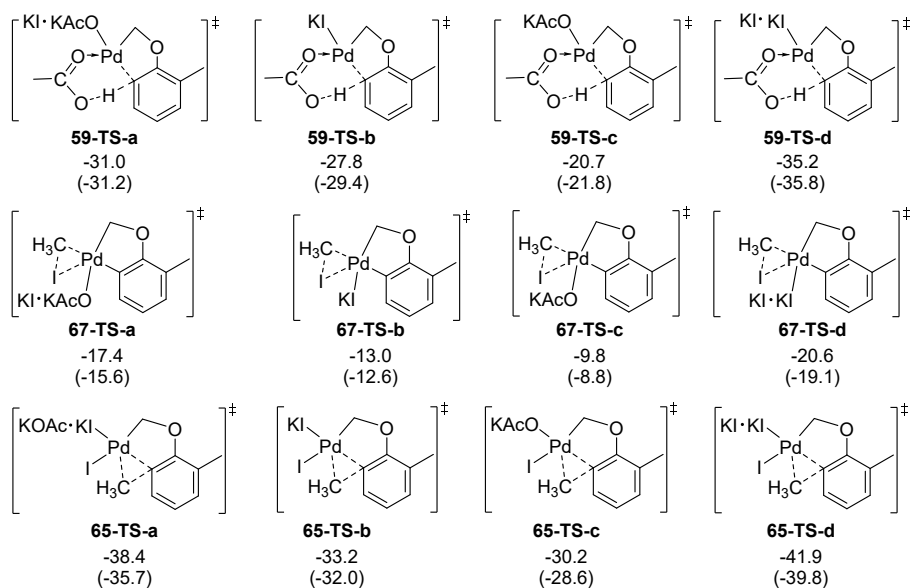

**Scheme S9.** Calculated relative free energies (enthalpies) of less favored transition states for the third C–H activation and C–C reductive elimination in the presence of KOAc. The free energies (enthalpies) are given in kcal/mol.

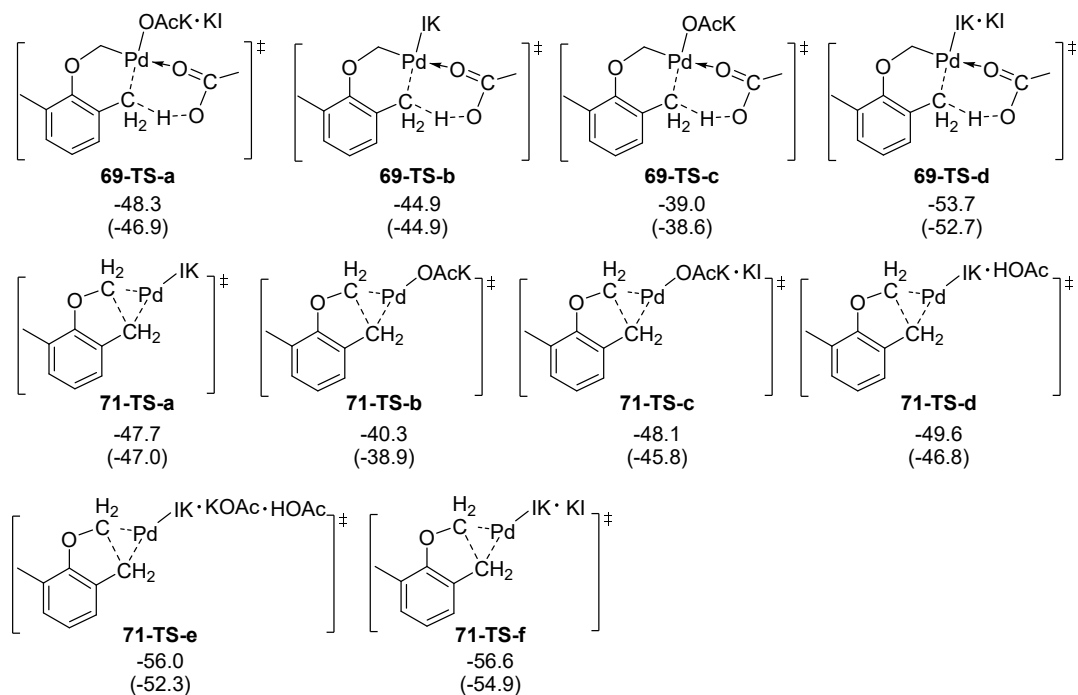



**Scheme S10.** Calculated relative free energies (enthalpies) of less favored transition states for the concerted hydride transfer and C–hydride reductive elimination before the proton transfer, the hydrogen transfer, and C–hydride reductive elimination in the presence of KOAc. The free energies (enthalpies) are given in kcal/mol.

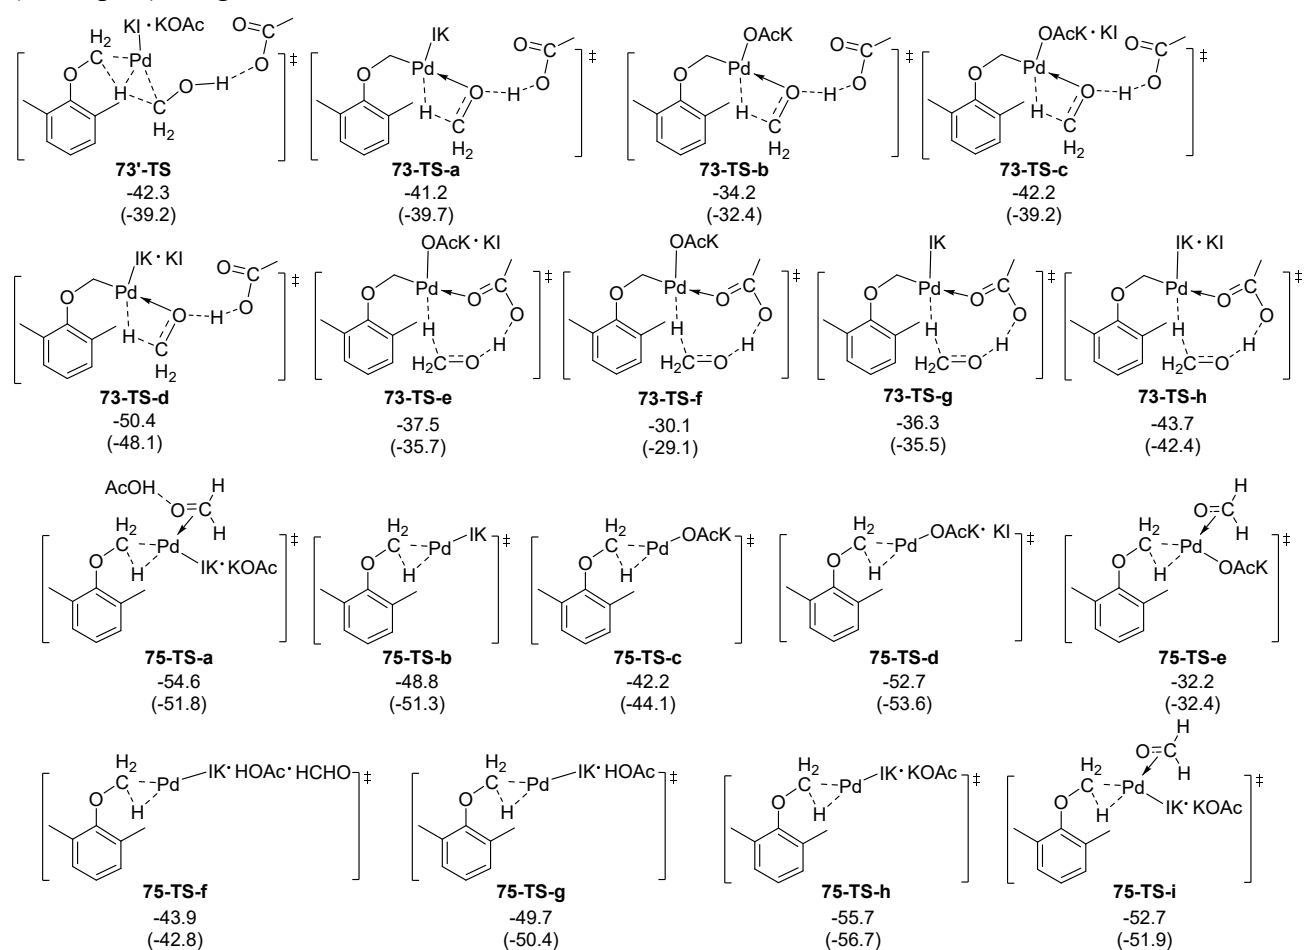

**Scheme S11.** Calculated relative free energies (enthalpies) of transition states for the alkylPd(II) species **66** protonation by HOAc in the presence of KOAc. The free energies (enthalpies) are given in kcal/mol.

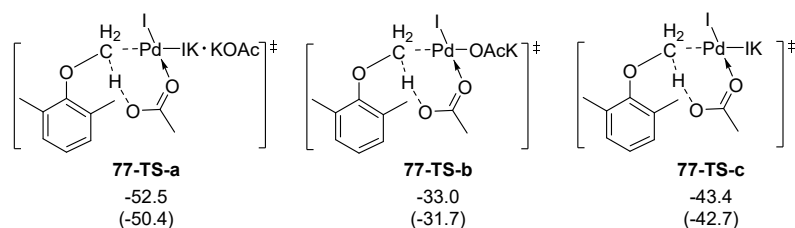

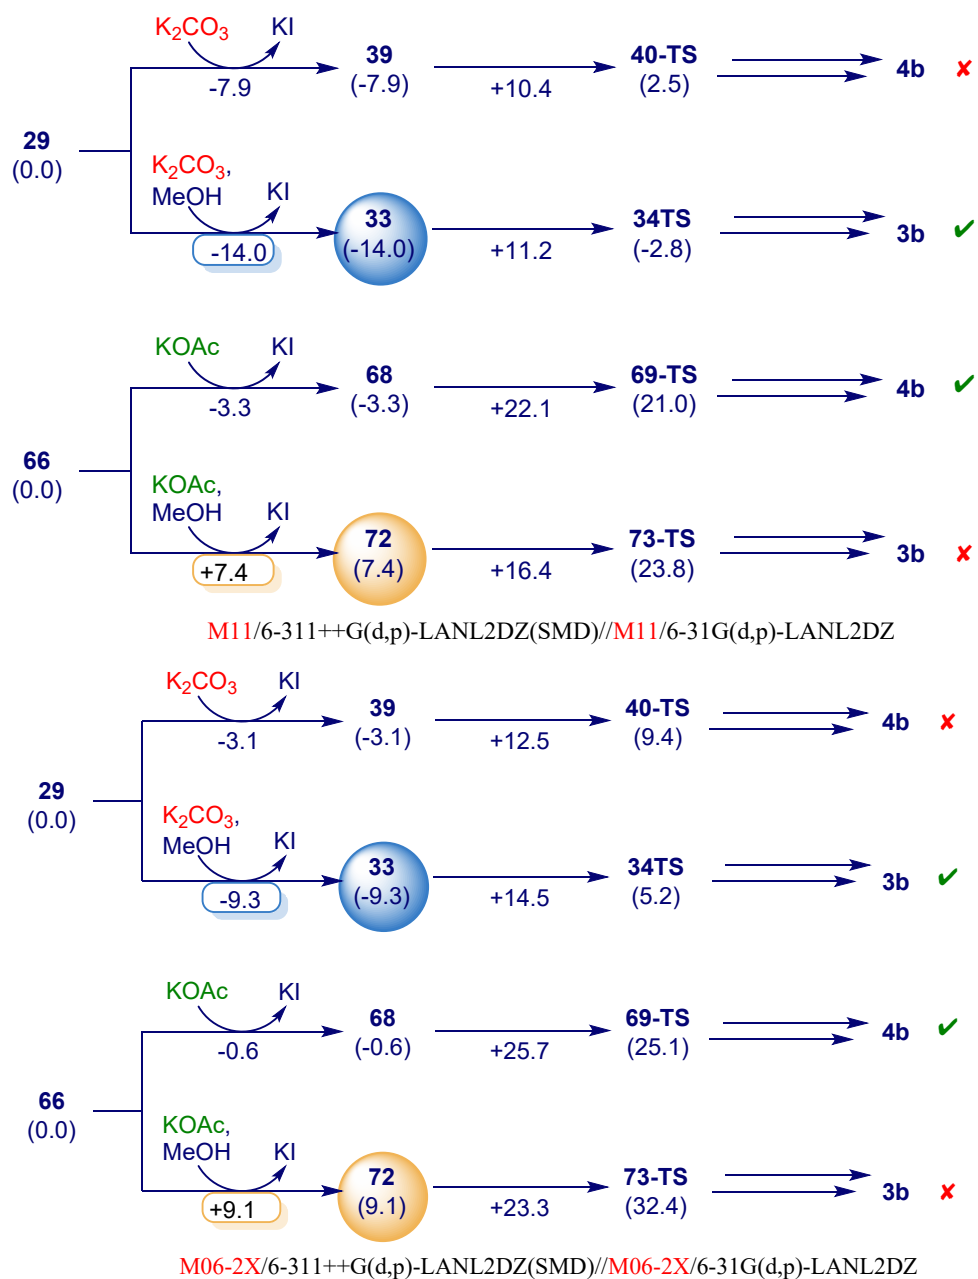

**Figure S6.** The calculated  $\Delta\Delta G$  of key intermediates and transition states using different density functionals.

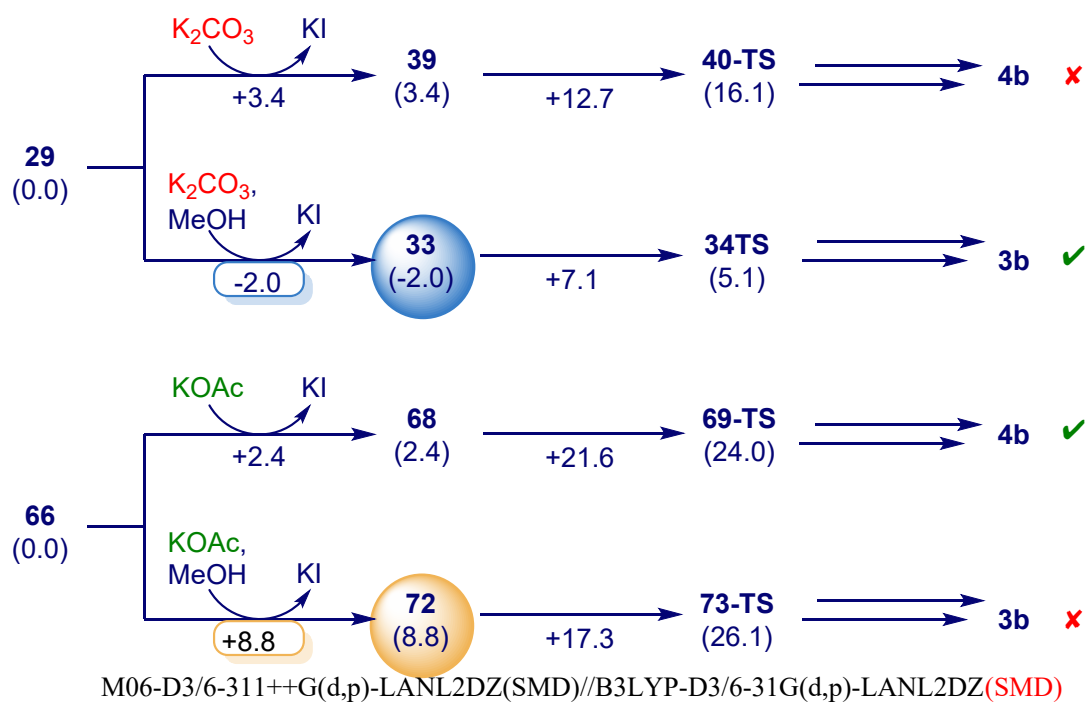

**Figure S7.** The calculated  $\Delta\Delta G$  of key intermediates and transition states that were optimized in the solution phase (solvent = DMAc) with the SMD solvation model.

**Table 1. Absolute calculation energies, enthalpies, and free energies.**

| Geometry       | $E_{(\text{elec-B3LYP-D3/BSI})}^1$ | $G_{(\text{corr-B3LYP-D3/BSI})}^2$ | $H_{(\text{corr-B3LYP-D3/BSI})}^3$ | $E_{(\text{sol, M06-D3/BSII})}^4$ | IF <sup>5</sup> |
|----------------|------------------------------------|------------------------------------|------------------------------------|-----------------------------------|-----------------|
| <b>1b</b>      | -357.55998                         | 0.087044                           | 0.131973                           | -357.3649805                      |                 |
| <b>3b</b>      | -425.4283563                       | 0.152279                           | 0.199730                           | -425.2027425                      |                 |
| <b>4b</b>      | -424.2223834                       | 0.134601                           | 0.177620                           | -424.0073405                      |                 |
| <b>int1</b>    | -345.5297888                       | 0.081296                           | 0.117443                           | -345.371363                       |                 |
| <b>int2</b>    | -384.8533074                       | 0.105993                           | 0.146844                           | -384.6674039                      |                 |
| <b>cat0</b>    | -841.9111026                       | 0.189513                           | 0.267337                           | -841.527353                       |                 |
| <b>cat1</b>    | -1312.8126181                      | 0.120016                           | 0.193454                           | -1312.5779116                     |                 |
| <b>cat2</b>    | -1012.7027159                      | 0.435661                           | 0.533560                           | -1012.1678517                     |                 |
| <b>cat3</b>    | -772.1925153                       | 0.198462                           | 0.275296                           | -771.8749525                      |                 |
| <b>cat4</b>    | -1183.4831916                      | 0.685997                           | 0.800233                           | -1182.8020001                     |                 |
| <b>cat5</b>    | -1783.705211                       | 0.053769                           | 0.119894                           | -1783.6288366                     |                 |
| <b>cat6</b>    | -1878.3387836                      | 0.095885                           | 0.168135                           | -1878.2391987                     |                 |
| <b>cat7</b>    | -1243.0765286                      | 0.133256                           | 0.200598                           | -1242.9205421                     |                 |
| <b>cat8</b>    | -702.4634499                       | 0.215606                           | 0.282703                           | -702.216318                       |                 |
| <b>5</b>       | -3054.2663707                      | -0.013112                          | 0.053221                           | -3054.2763957                     |                 |
| <b>6-TS</b>    | -841.908773                        | 0.191507                           | 0.267003                           | -841.5228843                      | -90.09          |
| <b>6-TS'</b>   | -1948.0732285                      | 0.085100                           | 0.158978                           | -1947.8887559                     | -76.26          |
| <b>7</b>       | -841.937454                        | 0.190296                           | 0.269284                           | -841.5472439                      |                 |
| <b>8</b>       | -1948.1492166                      | 0.088181                           | 0.160979                           | -1947.9459198                     |                 |
| <b>9-TS</b>    | -1948.1123938                      | 0.086224                           | 0.154917                           | -1947.9043329                     | -1188.92        |
| <b>9-TS-a</b>  | -1336.6329137                      | 0.090645                           | 0.148979                           | -1336.4711972                     | -877.81         |
| <b>9-TS-b</b>  | -1694.2479549                      | 0.202970                           | 0.283900                           | -1693.8789549                     | -871.36         |
| <b>10</b>      | -1948.1664407                      | 0.089958                           | 0.161116                           | -1947.9553541                     |                 |
| <b>11</b>      | -3411.981949                       | 0.095802                           | 0.187398                           | -3411.749607                      |                 |
| <b>12-TS</b>   | -2598.8223098                      | 0.105557                           | 0.191945                           | -2598.5621966                     | -293.37         |
| <b>12-TS-a</b> | -1135.0109793                      | 0.099814                           | 0.165638                           | -1134.7708308                     | -244.78         |
| <b>12-TS-b</b> | -1987.3621213                      | 0.113501                           | 0.186287                           | -1987.1367012                     | -289.67         |
| <b>12-TS-c</b> | -2598.8222765                      | 0.105925                           | 0.192413                           | -2598.5608374                     | -290.47         |

---

|                |               |          |          |                |          |
|----------------|---------------|----------|----------|----------------|----------|
| <b>12-TS-d</b> | -1999.4391537 | 0.119081 | 0.202149 | -1999.1671903  | -218.55  |
| <b>12-TS-e</b> | -1999.4576722 | 0.120154 | 0.202260 | -1999.1818126  | -291.81  |
| <b>13</b>      | -2598.8779715 | 0.106539 | 0.194462 | -2598.6049597  |          |
| <b>14-TS</b>   | -2598.8657009 | 0.107014 | 0.193280 | -2598.599306   | -335.80  |
| <b>14-TS-a</b> | -1135.0467091 | 0.101067 | 0.166898 | -1134.8042827  | -333.37  |
| <b>14-TS-b</b> | -1987.4054849 | 0.115304 | 0.187337 | -1987.1794945  | -326.49  |
| <b>14-TS-c</b> | -2598.8516013 | 0.107954 | 0.193144 | -2598.595 1966 | -352.99  |
| <b>14-TS-d</b> | -1999.4734794 | 0.119164 | 0.203091 | -1999.199903   | -310.00  |
| <b>14-TS-e</b> | -1999.4854709 | 0.119747 | 0.202856 | -1999. 2128035 | -302.23  |
| <b>15</b>      | -2598.9391597 | 0.108551 | 0.196314 | -2598.6697845  |          |
| <b>16-TS</b>   | -5158.8408755 | 0.105868 | 0.192196 | -5161.2172 722 | -329.61  |
| <b>17-TS</b>   | -3047.6183915 | 0.107196 | 0.192356 | -3047.3860705  | -373.46  |
| <b>18-TS</b>   | -2547.482441  | 0.074017 | 0.149302 | -2547.3007899  | -367.38  |
| <b>19</b>      | -2547.5112503 | 0.073074 | 0.151426 | -2547.3307522  |          |
| <b>20-TS</b>   | -2253.241558  | 0.000041 | 0.073912 | -2253.1734204  | -229.71  |
| <b>21</b>      | -2253.3128269 | 0.003030 | 0.075179 | -2253.2296295  |          |
| <b>22-TS</b>   | -2598.8326941 | 0.105820 | 0.192623 | -2598.5742274  | -343.07  |
| <b>23</b>      | -3451.2661846 | 0.119381 | 0.215364 | -3451. 0175656 |          |
| <b>24-TS</b>   | -3451.2612624 | 0.117384 | 0.210841 | -3451.0073011  | -571.94  |
| <b>24-TS-a</b> | -3451.2445009 | 0.118804 | 0.210768 | -3451.003 4986 | -534.30  |
| <b>24-TS-b</b> | -1987.452555  | 0.111389 | 0.184260 | -1987.216478   | -989.74  |
| <b>24-TS-c</b> | -2839.8196404 | 0.126859 | 0.205098 | -2839.5945341  | -627.28  |
| <b>24-TS-d</b> | -2598.8840907 | 0.102114 | 0.190169 | -25 98.6281514 | -1243.85 |
| <b>24-TS-e</b> | -2851.8860101 | 0.131234 | 0.220120 | -2851.6 137442 | -1158.23 |
| <b>24-TS-f</b> | -2851.880222  | 0.129684 | 0.220195 | -2851.6226317  | -853.15  |
| <b>24-TS-g</b> | -1388.0733824 | 0.122946 | 0.193933 | -1387.8268039  | -1132.98 |
| <b>24-TS-h</b> | -2240.4056815 | 0.134768 | 0.213870 | -2240.18108 23 | -821.54  |
| <b>25</b>      | -3451.3052711 | 0.121073 | 0.216768 | -3451.0459 854 |          |
| <b>26-TS</b>   | -2638.146608  | 0.131166 | 0.221332 | -2637.8589411  | -293.66  |
| <b>26-TS-a</b> | -1174.3346313 | 0.125235 | 0.194999 | -1174.067259   | -244.84  |
| <b>26-TS-b</b> | -2026.6856271 | 0.138933 | 0.215689 | -2026.4329363  | -289.82  |
| <b>26-TS-c</b> | -2638.1460076 | 0.131426 | 0.221805 | -2637.8569822  | -290.77  |

---

---

|                |                |          |          |               |          |
|----------------|----------------|----------|----------|---------------|----------|
| <b>26-TS-d</b> | -2038.7634226  | 0.144864 | 0.231588 | -2038.4639053 | -223.93  |
| <b>26-TS-e</b> | -2038.7819502  | 0.145374 | 0.231635 | -2038.479401  | -292.14  |
| <b>27</b>      | -2638.2018401  | 0.132482 | 0.223953 | -2637.9015378 |          |
| <b>28-TS</b>   | -2638.1895989  | 0.132242 | 0.222689 | -2637.8956294 | -334.04  |
| <b>28-TS-a</b> | -1174.370625   | 0.126450 | 0.196316 | -1174.1007005 | -333.20  |
| <b>28-TS-b</b> | -2026.7293422  | 0.140557 | 0.216745 | -2026.4760444 | -324.59  |
| <b>28-TS-c</b> | -2638.1759639  | 0.133536 | 0.222566 | -2637.8922091 | -349.65  |
| <b>28-TS-d</b> | -2038.7977797  | 0.144431 | 0.232504 | -2038.4967814 | -307.22  |
| <b>28-TS-e</b> | -2038.8097673  | 0.145326 | 0.232277 | -2038.5097599 | -299.50  |
| <b>29</b>      | -2638.2444546  | 0.136023 | 0.226025 | -2637.9561776 |          |
| <b>30-TS</b>   | -2586.8088208  | 0.100390 | 0.178752 | -2586.5989541 | -370.92  |
| <b>31</b>      | -2586.8403036  | 0.101776 | 0.181015 | -2586.6297513 |          |
| <b>32-TS</b>   | -2638.1570145  | 0.130729 | 0.222068 | -2637.8712702 | -335.60  |
| <b>33</b>      | -3606.3746031  | 0.197108 | 0.302451 | -3606.040 028 |          |
| <b>34-TS</b>   | -3606.3548919  | 0.191011 | 0.298303 | -3606.0228643 | -591.65  |
| <b>34'-TS</b>  | -3606.3071069  | 0.194444 | 0.297941 | -3605.9902926 | -1146.25 |
| <b>34-TS-a</b> | -3606.3220482  | 0.189858 | 0.298455 | -3606.008153  | -415.78  |
| <b>34-TS-b</b> | -2994.9152877  | 0.201796 | 0.292812 | -2994.6166911 | -529.24  |
| <b>34-TS-c</b> | -2142.5277638  | 0.184627 | 0.271774 | -2142.2235033 | -349.12  |
| <b>34-TS-d</b> | -2753.9519228  | 0.175921 | 0.277821 | -2753.6239915 | -446.52  |
| <b>35</b>      | -3491.8292735  | 0.160820 | 0.265336 | -3491.5298123 |          |
| <b>36-TS</b>   | -3606.3498116  | 0.192076 | 0.297334 | -3606.0155348 | -249.68  |
| <b>36-TS-a</b> | -2142.537272   | 0.188421 | 0.271331 | -2142.537272  | -173.99  |
| <b>36-TS-b</b> | -299 4.9180625 | 0.202762 | 0.292690 | -2994.6126184 | -226.20  |
| <b>36-TS-c</b> | -3606.3445918  | 0.195548 | 0.298568 | -3606.0148355 | -197.32  |
| <b>36-TS-d</b> | -2753.966901   | 0.178809 | 0.277102 | -2753.6278906 | -143.80  |
| <b>37-TS</b>   | -3491.8216506  | 0.162040 | 0.264470 | -3491.5311284 | -709.21  |
| <b>37-TS-a</b> | -3606.3415943  | 0.192576 | 0.298531 | -3606.0137481 | -860.85  |
| <b>37-TS-b</b> | -1163.5707785  | 0.136795 | 0.201790 | -1163.3314716 | -649.61  |
| <b>37-TS-c</b> | -20 15.9111292 | 0.149704 | 0.222567 | -2015.6936226 | -662.04  |
| <b>37-TS-d</b> | -2627.371817   | 0.143522 | 0.228716 | -2627.112794  | -642.75  |
| <b>37-TS-e</b> | -2627.3664528  | 0.143502 | 0.228733 | -2627.1157578 | -652.25  |

---

---

|                |               |          |          |               |          |
|----------------|---------------|----------|----------|---------------|----------|
| <b>37-TS-f</b> | -2741.9039397 | 0.166896 | 0.261476 | -2741.6052645 | -714.35  |
| <b>38-TS-a</b> | -3502.6120759 | 0.150708 | 0.256121 | -3502.2969025 | -1408.19 |
| <b>38-TS-b</b> | -3502.6160799 | 0.151461 | 0.255665 | -3502.3008842 | -1414.99 |
| <b>38-TS-c</b> | -4354.9945515 | 0.167520 | 0.276832 | -4354.6818385 | -1295.20 |
| <b>39</b>      | -3490.6008201 | 0.146091 | 0.245732 | -3490.3127968 |          |
| <b>40-TS</b>   | -3490.5779422 | 0.145219 | 0.240286 | -3490.2943351 | -908.12  |
| <b>40-TS-a</b> | -3490.5616062 | 0.144172 | 0.240160 | -3490.285863  | -1167.41 |
| <b>40-TS-b</b> | -2026.7660414 | 0.139226 | 0.214143 | -2026.5044856 | -1237.01 |
| <b>40-TS-c</b> | -2879.1200902 | 0.152828 | 0.234314 | -2878.8775986 | -901.43  |
| <b>40-TS-d</b> | -2638.2002097 | 0.130313 | 0.219716 | -2637.9096409 | -1189.36 |
| <b>41</b>      | -3490.6297018 | 0.148664 | 0.246303 | -3490.3421126 |          |
| <b>42-TS</b>   | -3490.5871201 | 0.147714 | 0.243933 | -3490.3200663 | -480.25  |
| <b>42-TS-a</b> | -1162.3388063 | 0.119531 | 0.181903 | -1162.1189826 | -519.16  |
| <b>42-TS-b</b> | -2026.7825539 | 0.139824 | 0.218263 | -2026.5329189 | -479.86  |
| <b>42-TS-c</b> | -1415.3302536 | 0.145208 | 0.212805 | -1415.1090541 | -500.58  |
| <b>42-TS-d</b> | -3490.5827507 | 0.145794 | 0.244771 | -3490.3134465 | -470.97  |
| <b>42-TS-e</b> | -2014.6691375 | 0.130140 | 0.202264 | -2014.4732285 | -517.66  |
| <b>42-TS-f</b> | -2879.1221651 | 0.150653 | 0.238731 | -2878.8952816 | -481.01  |
| <b>42-TS-g</b> | -2626.135724  | 0.124852 | 0.208605 | -2625.89585   | -492.84  |
| <b>42-TS-h</b> | -2626.144793  | 0.128822 | 0.208651 | -2625.9073282 | -492.26  |
| <b>43</b>      | -1312.8538741 | 0.121152 | 0.194020 | -1312.6076865 |          |
| <b>44-TS</b>   | -1312.8157951 | 0.121195 | 0.188159 | -1312.5695897 | -1367.53 |
| <b>45</b>      | -1312.8524688 | 0.123011 | 0.194118 | -1312.6076436 |          |
| <b>46</b>      | -2141.3684432 | 0.159991 | 0.253333 | -2141.0694209 |          |
| <b>47-TS</b>   | -1912.1963161 | 0.106253 | 0.182254 | -1911.9729595 | -371.31  |
| <b>48</b>      | -1912.2296641 | 0.108470 | 0.184521 | -1912.006178  |          |
| <b>49-TS</b>   | -1617.9569882 | 0.031269 | 0.106802 | -1617.8465304 | -202.59  |
| <b>50</b>      | -1618.0083962 | 0.030969 | 0.107835 | -1617.8764173 |          |
| <b>51-TS</b>   | -1963.5267851 | 0.138035 | 0.225602 | -1963.23766   | -342.66  |
| <b>52</b>      | -1963.5804911 | 0.145531 | 0.227775 | -1963.2741354 |          |
| <b>53-TS</b>   | -1963.5602276 | 0.138002 | 0.226148 | -1963.2618902 | -325.45  |
| <b>53-TS-a</b> | -1963.5590798 | 0.141051 | 0.226444 | -1963.2575543 | -341.92  |

---

|                |               |          |          |               |          |
|----------------|---------------|----------|----------|---------------|----------|
| <b>53-TS-b</b> | -1352.1304358 | 0.150511 | 0.220634 | -1351.8576867 | -336.51  |
| <b>53-TS-c</b> | -1135.0467091 | 0.101067 | 0.166898 | -1134.8042827 | -333.37  |
| <b>54</b>      | -1963.6168847 | 0.137494 | 0.228746 | -1963.3202179 |          |
| <b>55-TS</b>   | -1963.526195  | 0.134430 | 0.225012 | -1963.2268352 | -298.81  |
| <b>55-TS-a</b> | -1963.5252388 | 0.137698 | 0.225159 | -1963.2220735 | -241.14  |
| <b>55-TS-b</b> | -1352.0960995 | 0.146692 | 0.219554 | -1351.8201053 | -244.78  |
| <b>55-TS-c</b> | -1135.0109793 | 0.099814 | 0.165638 | -1134.7708308 | -244.78  |
| <b>55-TS-d</b> | -752.7108779  | 0.160393 | 0.229545 | -752.4235472  | -282.78  |
| <b>56-TS</b>   | -4523.5454701 | 0.135983 | 0.225243 | -4525.8829958 | -323.52  |
| <b>57-TS</b>   | -2412.3249647 | 0.140692 | 0.225582 | -2412.0556372 | -378.87  |
| <b>58</b>      | -2180.6945663 | 0.185462 | 0.282158 | -2180.3667268 |          |
| <b>59-TS</b>   | -2180.6733023 | 0.183152 | 0.276875 | -2180.3432415 | -1199.11 |
| <b>59-TS-a</b> | -2180.6659098 | 0.183264 | 0.276923 | -2180.3352966 | -1208.77 |
| <b>59-TS-b</b> | -1352.1548517 | 0.144914 | 0.217457 | -1351.8862885 | -1292.34 |
| <b>59-TS-c</b> | -1569.2357577 | 0.194397 | 0.271193 | 1568.9315248  | -1209.46 |
| <b>59-TS-d</b> | -1963.5921956 | 0.137746 | 0.223370 | 1963.2893829  | -1166.99 |
| <b>60</b>      | -2180.6919947 | 0.185388 | 0.282726 | -2180.3655027 |          |
| <b>61-TS</b>   | -1951.5231177 | 0.132596 | 0.211867 | -1951.2702346 | -371.74  |
| <b>62</b>      | -1951.5558558 | 0.133205 | 0.214116 | -1951.3034173 |          |
| <b>63-TS</b>   | -2002.8512449 | 0.163153 | 0.255074 | -2002.5348419 | -336.04  |
| <b>64</b>      | -2002.9045897 | 0.170673 | 0.257186 | -2002.5707973 |          |
| <b>65-TS</b>   | -2002.8842137 | 0.163300 | 0.255565 | -2002.5586039 | -323.55  |
| <b>65-TS-a</b> | -2002.8836382 | 0.166423 | 0.255855 | -2002.5545166 | -339.61  |
| <b>65-TS-b</b> | -1174.370625  | 0.126450 | 0.196316 | -1174.1007005 | -333.20  |
| <b>65-TS-c</b> | -1391.4535714 | 0.175384 | 0.250034 | -1391.1520217 | -321.54  |
| <b>65-TS-d</b> | -1785.8017003 | 0.117090 | 0.201934 | -1785.5037051 | -318.60  |
| <b>66</b>      | -2002.9373683 | 0.164200 | 0.256876 | -2002.6157626 |          |
| <b>67-TS</b>   | -2002.8500515 | 0.160088 | 0.254422 | -2002.5227985 | -299.38  |
| <b>67-TS-a</b> | -2002.848855  | 0.163180 | 0.254570 | -2002.5179244 | -243.08  |
| <b>67-TS-b</b> | -1174.3346313 | 0.125235 | 0.194999 | -1174.067259  | -244.84  |
| <b>67-TS-c</b> | -1391.419487  | 0.171917 | 0.248944 | -1391.1160514 | -244.94  |
| <b>67-TS-d</b> | -1785.7671975 | 0.115248 | 0.200937 | -1785.4678361 | -253.76  |



---

|                |               |          |          |               |          |
|----------------|---------------|----------|----------|---------------|----------|
| <b>68</b>      | -2220.0338632 | 0.216551 | 0.312242 | -2219.6723957 |          |
| <b>69-TS</b>   | -2219.9953678 | 0.213204 | 0.306689 | -2219.6339333 | -1291.66 |
| <b>69-TS-a</b> | -2219.9774142 | 0.212008 | 0.306937 | -2219.6231275 | -1210.95 |
| <b>69-TS-b</b> | -1391.4642581 | 0.172743 | 0.247382 | -1391.1727921 | -1322.59 |
| <b>69-TS-c</b> | -1608.5475918 | 0.221607 | 0.301090 | -1608.2194355 | -1236.44 |
| <b>69-TS-d</b> | -2002.9142238 | 0.167744 | 0.253099 | -2002.5802176 | -1300.05 |
| <b>70</b>      | -1990.8930143 | 0.161856 | 0.243204 | -1990.5991065 |          |
| <b>71-TS</b>   | -1990.8611747 | 0.161107 | 0.241485 | -1990.5829132 | -507.58  |
| <b>71-TS-a</b> | -1162.3388063 | 0.119531 | 0.181903 | -1162.1189826 | -519.16  |
| <b>71-TS-b</b> | -1379.4128965 | 0.166451 | 0.235907 | -1379.1612461 | -495.26  |
| <b>71-TS-c</b> | -1990.8502517 | 0.161910 | 0.241774 | -1990.5677121 | -480.64  |
| <b>71-TS-d</b> | -1391.4749549 | 0.177731 | 0.251753 | -1391.1852022 | -498.05  |
| <b>71-TS-e</b> | -2219.9848153 | 0.216823 | 0.310547 | 2219.6402104  | -483.94  |
| <b>71-TS-f</b> | -1773.7745287 | 0.113134 | 0.187759 | -1773.5252501 | -505.49  |
| <b>72</b>      | -2335.7673202 | 0.262170 | 0.367935 | -2335.3655427 |          |
| <b>73-TS</b>   | -2335.7411399 | 0.256611 | 0.364500 | -2335.3387822 | -369.38  |
| <b>73'-TS</b>  | -2335.723019  | 0.262172 | 0.365225 | -2335.3288795 | -1283.61 |
| <b>73-TS-a</b> | -1507.2236129 | 0.222655 | 0.305346 | -1507.2236129 | -403.93  |
| <b>73-TS-b</b> | -1724.3010313 | 0.268670 | 0.358933 | -1723.923972  | -536.49  |
| <b>73-TS-c</b> | -2335.7260571 | 0.259159 | 0.365052 | -2335.32562   | -500.88  |
| <b>73-TS-d</b> | -2118.6669475 | 0.215507 | 0.310938 | -2118.2879743 | -486.00  |
| <b>73-TS-e</b> | -2335.72196   | 0.260515 | 0.363323 | -2335.3196429 | -294.55  |
| <b>73-TS-f</b> | -1724.2885461 | 0.268387 | 0.357559 | -1723.9171314 | -350.84  |
| <b>73-TS-g</b> | -1507.2064875 | 0.219940 | 0.304261 | -1506.8713905 | -126.96  |
| <b>73-TS-h</b> | -2118.6339869 | 0.207820 | 0.309335 | -2118.2695948 | -196.74  |
| <b>74</b>      | -2221.2163561 | 0.232138 | 0.332130 | -2220.8508426 |          |
| <b>75-TS</b>   | -2221.2107861 | 0.227000 | 0.330278 | -2220.8512761 | -621.39  |
| <b>75-TS-a</b> | -2335.7398111 | 0.255506 | 0.364814 | -2335.3418153 | -564.50  |
| <b>75-TS-b</b> | -1163.5707785 | 0.136795 | 0.201790 | -1163.3314716 | -694.61  |
| <b>75-TS-c</b> | -1380.6472197 | 0.183737 | 0.255850 | -1380.3750974 | -700.47  |
| <b>75-TS-d</b> | -1992.0795569 | 0.175252 | 0.261845 | -1991.781866  | -596.93  |
| <b>75-TS-e</b> | -1495.1652009 | 0.212758 | 0.289098 | -1494.859839  | -796.25  |

---

|                |               |          |          |               |          |
|----------------|---------------|----------|----------|---------------|----------|
| <b>75-TS-f</b> | -1507.2135644 | 0.215028 | 0.304718 | -1506.8785728 | -614.84  |
| <b>75-TS-g</b> | -1392.6947221 | 0.191131 | 0.271384 | -1392.3922597 | -688.55  |
| <b>75-TS-h</b> | -1992.0837209 | 0.177607 | 0.261576 | -1991.7877436 | -602.03  |
| <b>75-TS-i</b> | -2106.6146302 | 0.203505 | 0.295037 | -2106.2817908 | -586.94  |
| <b>76-TS</b>   | -2335.7171282 | 0.256207 | 0.362920 | -2335.3237558 | -294.77  |
| <b>77-TS-a</b> | -2232.0271277 | 0.220477 | 0.321675 | -2231.6361653 | -1405.30 |
| <b>77-TS-b</b> | -1620.5842307 | 0.229603 | 0.316123 | -1620.2157098 | -1255.71 |
| <b>77-TS-c</b> | -1403.5033653 | 0.180540 | 0.262157 | -1403.176055  | -1426.92 |

<sup>1</sup>The electronic energy calculated at B3LYP-D3/BSI level (BSI designates the basis set combination of LanL2DZ for Pd and I atoms, and 6-31G(d,p) for other atoms) in gas phase. <sup>2</sup>The thermal correction to Gibbs free energy calculated at B3LYP-D3/BSI level in gas phase. <sup>3</sup>The thermal correction to enthalpy calculated at B3LYP-D3/BSI level in gas phase. <sup>4</sup>The electronic energy calculated at M06-D3/BSII (BSII designates the basis set combination of LANL2DZ for Pd and I atoms, and 6-311++G(d,p) for other atoms) level in DMAc solvent. <sup>5</sup>The B3LYP-D3/BSI calculated imaginary frequencies for the transition states.

**Table 2. B3LYP-D3 geometries for all the optimized compounds and transition states.** The atomic coordinates are given at B3LYP-D3/BSI level. (BSI designates the basis set combination of LanL2DZ for Pd and I atoms, and 6-31G(d,p) for other atoms in the gas phase.

|           |             |             |             |           |             |             |             |
|-----------|-------------|-------------|-------------|-----------|-------------|-------------|-------------|
| <b>Ib</b> |             |             |             | C         | 0.62799700  | 2.38765300  | -0.04160200 |
| C         | -0.28023300 | -0.03634600 | 0.03887300  | C         | -0.77574400 | 2.41467300  | -0.02209500 |
| C         | 1.11558500  | -0.05602700 | 0.04054800  | C         | -1.45695300 | 1.19237000  | 0.00560800  |
| C         | 1.82626600  | 1.14409000  | -0.00850600 | H         | -1.30326800 | -0.95599300 | 0.04034400  |
| C         | 1.15223500  | 2.37196200  | -0.05198900 | H         | 1.17855800  | -0.95638600 | 0.03044700  |
| C         | -0.24768000 | 2.37552000  | -0.05191600 | H         | -2.54393600 | 1.19340300  | 0.02740600  |
| C         | -0.96241600 | 1.18072200  | -0.00613600 | O         | 1.32201900  | 3.58914300  | -0.02129800 |
| H         | -0.82785900 | -0.97299000 | 0.07831300  | C         | 1.62200500  | 4.11311900  | -1.31279300 |
| H         | 1.64841200  | -0.99954100 | 0.08059000  | H         | 2.15956000  | 5.05106200  | -1.15486700 |
| H         | -0.75210800 | 3.33658700  | -0.07481700 | H         | 2.25648500  | 3.42757900  | -1.89007100 |
| H         | -2.04803700 | 1.20037400  | -0.00114800 | H         | 0.70957500  | 4.31408500  | -1.88968500 |
| O         | 1.82661500  | 3.56556900  | -0.05361700 | C         | 2.86176000  | 1.20516200  | -0.01732200 |
| C         | 2.06434800  | 4.10721100  | -1.35606000 | H         | 3.26369400  | 1.35060400  | -1.02790500 |
| H         | 2.59462300  | 5.04940800  | -1.20632900 | H         | 3.23895700  | 2.02605300  | 0.59806500  |
| H         | 2.68492400  | 3.43301500  | -1.95921500 | H         | 3.26623700  | 0.26263400  | 0.36198400  |
| H         | 1.12049600  | 4.29761100  | -1.88400200 | C         | -1.51225200 | 3.73189700  | -0.02204600 |
| I         | 3.96781500  | 1.10401600  | 0.00430400  | H         | -0.98724400 | 4.47080500  | 0.58885600  |
|           |             |             |             | H         | -1.59035900 | 4.14884700  | -1.03403600 |
| <b>3b</b> |             |             |             | H         | -2.52955700 | 3.61324000  | 0.36121100  |
| C         | -0.76015600 | -0.01563600 | 0.01411100  |           |             |             |             |
| C         | 0.63439500  | -0.01544200 | 0.00731600  | <b>4b</b> |             |             |             |
| C         | 1.35282700  | 1.18535000  | -0.02012700 | C         | -0.19259800 | -0.77585300 | 0.06345100  |

|             |             |             |             |             |            |             |             |
|-------------|-------------|-------------|-------------|-------------|------------|-------------|-------------|
| C           | 1.20777900  | -0.76978000 | 0.06373500  | O           | 7.99320400 | -0.03224000 | 1.26160800  |
| C           | 1.86542400  | 0.45422000  | 0.03156800  | C           | 8.23526000 | 1.37733200  | 1.36122400  |
| C           | 1.12900800  | 1.63805800  | -0.00809300 | H           | 7.50881400 | 1.86882800  | 2.01690000  |
| C           | -0.26642100 | 1.67356700  | -0.01565600 | H           | 8.19345600 | 1.84707600  | 0.37066400  |
| C           | -0.90679800 | 0.42617700  | 0.02160500  | H           | 9.23738200 | 1.48571400  | 1.77996400  |
| H           | -0.72999800 | -1.71876000 | 0.09661400  | I           | 5.80043500 | -0.18495400 | 3.74437200  |
| H           | 1.76654100  | -1.70125900 | 0.09097200  |             |            |             |             |
| H           | -1.99388700 | 0.40176300  | 0.02376000  | <b>cat1</b> |            |             |             |
| O           | 1.90929500  | 2.76400300  | -0.04448300 | Pd          | 4.81466300 | 1.19591500  | 0.07921200  |
| C           | -1.00416300 | 2.98522200  | -0.06008500 | C           | 3.29111400 | 3.04990200  | -1.50449400 |
| H           | -0.68473100 | 3.64355700  | 0.75542600  | C           | 4.56380400 | 3.03780000  | -0.82932100 |
| H           | -0.80025400 | 3.52298500  | -0.99345700 | C           | 4.62763300 | 3.38847300  | 0.55529000  |
| H           | -2.08443400 | 2.83557000  | 0.01847800  | C           | 3.43219400 | 3.74478000  | 1.24318600  |
| C           | 3.27219200  | 2.34571100  | 0.22232000  | C           | 2.22656600 | 3.75930000  | 0.57263200  |
| H           | 3.93215600  | 2.92929400  | -0.42343500 | C           | 2.15753000 | 3.39781100  | -0.79043700 |
| H           | 3.50010200  | 2.58236200  | 1.26949700  | H           | 5.57912400 | 3.65808500  | 1.00206900  |
| C           | 3.33182100  | 0.81928900  | -0.03144200 | H           | 3.49643700 | 4.04597100  | 2.28416100  |
| H           | 3.94513100  | 0.30572400  | 0.71527000  | H           | 1.31684700 | 4.04797500  | 1.09020400  |
| H           | 3.75240900  | 0.58853000  | -1.01859200 | H           | 1.20929300 | 3.37610100  | -1.31779800 |
|             |             |             |             | O           | 3.16376600 | 2.78415400  | -2.83537000 |
| <b>cat0</b> |             |             |             | C           | 3.56513000 | 1.47739700  | -3.26722500 |
| C           | 3.85963300  | 3.16414900  | -1.24517700 | H           | 4.64289000 | 1.32415900  | -3.15184300 |
| C           | 4.19055600  | 3.50341300  | 0.10270400  | H           | 3.03146000 | 0.70586200  | -2.69886000 |
| C           | 3.17736400  | 3.47313800  | 1.09674700  | H           | 3.30092500 | 1.41520200  | -4.32474200 |
| C           | 1.85525100  | 3.13272500  | 0.74219000  | I           | 6.33105200 | 3.69450200  | -2.11391500 |
| C           | 1.54094600  | 2.83986200  | -0.57865700 | O           | 4.99591400 | -0.89262500 | 0.44417400  |
| C           | 2.54089300  | 2.84289600  | -1.56025000 | C           | 6.00313000 | -1.66896600 | 0.58512200  |
| H           | 3.38987200  | 3.85346800  | 2.09011400  | O           | 7.20658900 | -1.36073700 | 0.41107500  |
| H           | 1.08772400  | 3.13562300  | 1.50956200  | C           | 5.65283400 | -3.09304800 | 1.00539400  |
| H           | 0.51894900  | 2.60092900  | -0.85629200 | H           | 5.17033000 | -3.07025200 | 1.98773500  |
| H           | 2.31820000  | 2.60486100  | -2.59528000 | H           | 4.92921300 | -3.51676300 | 0.30285600  |
| O           | 4.77830400  | 3.23256900  | -2.25300900 | H           | 6.54537800 | -3.71887800 | 1.04799600  |
| C           | 5.70455500  | 2.14038500  | -2.32287400 | K           | 7.93253600 | 0.89988500  | -0.33311500 |
| H           | 6.36258500  | 2.11503000  | -1.44728400 |             |            |             |             |
| H           | 5.17272300  | 1.18390300  | -2.38962100 | <b>cat2</b> |            |             |             |
| H           | 6.30001600  | 2.30277700  | -3.22348900 | N           | 4.40441800 | -1.30790500 | 0.56282800  |
| I           | 5.99562800  | 4.67018500  | 0.47728500  | C           | 3.43593900 | -1.32180500 | 1.69504200  |
| Pd          | 4.63229800  | 1.54468900  | 0.99133400  | H           | 3.66498200 | -0.45147700 | 2.31846100  |
| C           | 6.77158400  | -0.39760700 | 0.77515700  | H           | 2.44947200 | -1.13097800 | 1.25773100  |
| C           | 5.58596400  | -0.32326600 | 1.57608800  | C           | 5.80111700 | -1.66722800 | 0.93715500  |
| C           | 4.35832000  | -0.81109400 | 1.04400600  | H           | 6.46343500 | -1.16341200 | 0.22415600  |
| C           | 4.32595800  | -1.36453300 | -0.25592300 | H           | 5.98710200 | -1.19834900 | 1.90993700  |
| C           | 5.48661700  | -1.44193300 | -1.01114300 | C           | 3.91006200 | -1.95912200 | -0.68257900 |
| C           | 6.69793700  | -0.94787100 | -0.50028900 | H           | 3.15304400 | -1.29227700 | -1.11148600 |
| H           | 3.49580200  | -0.91714200 | 1.69286700  | H           | 4.75172000 | -1.96196800 | -1.38508300 |
| H           | 3.38809400  | -1.75710900 | -0.63572200 | C           | 3.29344100 | -3.36724400 | -0.61306000 |
| H           | 5.46619500  | -1.88809100 | -2.00078800 | C           | 2.93883600 | -3.87988500 | -2.01553900 |
| H           | 7.61586500  | -0.99759300 | -1.07714900 | H           | 2.38084500 | -3.33922800 | -0.00478100 |

|             |            |             |             |             |             |             |             |
|-------------|------------|-------------|-------------|-------------|-------------|-------------|-------------|
| H           | 3.97189900 | -4.07641400 | -0.12980600 | C           | 3.23378400  | 3.10804800  | 1.09051500  |
| C           | 2.26816600 | -5.25655200 | -1.99090900 | C           | 2.04582400  | 2.36069900  | 0.89841900  |
| H           | 2.27722400 | -3.15645400 | -2.51141600 | C           | 1.62678600  | 2.03886800  | -0.38220800 |
| H           | 3.85127200 | -3.92587400 | -2.62569200 | C           | 2.39562200  | 2.41559300  | -1.49764400 |
| H           | 2.02905400 | -5.60388500 | -3.00108800 | H           | 3.42530500  | 3.55326700  | 2.06124700  |
| H           | 2.92083000 | -6.00425500 | -1.52603100 | H           | 1.45030000  | 2.08721700  | 1.76453500  |
| H           | 1.33497000 | -5.23003500 | -1.41681900 | H           | 0.70414800  | 1.48619900  | -0.53384300 |
| C           | 6.21547700 | -3.14823600 | 0.98758300  | H           | 2.09597900  | 2.14681800  | -2.50562300 |
| C           | 7.65768100 | -3.29668500 | 1.49086200  | O           | 4.19996400  | 3.55193300  | -2.49718000 |
| H           | 6.14365700 | -3.58469000 | -0.01659800 | C           | 5.56564700  | 3.15873300  | -2.66210800 |
| H           | 5.54680400 | -3.72823000 | 1.63061800  | H           | 6.22527800  | 3.64754900  | -1.93887400 |
| C           | 8.13345100 | -4.75247400 | 1.50391600  | H           | 5.66366300  | 2.06976800  | -2.56028900 |
| H           | 8.32709900 | -2.69531100 | 0.86104600  | H           | 5.84781600  | 3.46503300  | -3.67205800 |
| H           | 7.73251200 | -2.87572000 | 2.50276300  | I           | 5.08175000  | 5.47840800  | 0.16730500  |
| H           | 9.16160300 | -4.83480800 | 1.87054200  | Pd          | 5.19849300  | 1.99907200  | 0.62931600  |
| H           | 7.49763200 | -5.36891200 | 2.14973500  | C           | 8.57143000  | -1.39129200 | 1.66173100  |
| H           | 8.10161700 | -5.18635300 | 0.49793600  | H           | 8.63152100  | -0.31444700 | 1.52155200  |
| C           | 3.36657300 | -2.54947500 | 2.62067800  | H           | 9.00879500  | -1.66098100 | 2.62993200  |
| C           | 2.24426800 | -2.38819300 | 3.65498700  | H           | 9.13916800  | -1.89575400 | 0.87078800  |
| H           | 4.32130600 | -2.66582200 | 3.14829000  | N           | 7.17147900  | -1.80411900 | 1.61675600  |
| H           | 3.20617800 | -3.47188500 | 2.05455300  | C           | 6.94312900  | -3.22533200 | 1.83223300  |
| C           | 2.17169900 | -3.55935800 | 4.63947600  | H           | 5.88613500  | -3.47560200 | 1.78100200  |
| H           | 2.39095900 | -1.45036700 | 4.20774700  | H           | 7.47355800  | -3.81275000 | 1.07242300  |
| H           | 1.28339800 | -2.28581800 | 3.13250900  | H           | 7.32152700  | -3.52426800 | 2.81753900  |
| H           | 1.36270000 | -3.42423800 | 5.36453200  | C           | 6.19829500  | -0.88809100 | 1.36871900  |
| H           | 1.99541400 | -4.50519200 | 4.11449200  | O           | 6.49985700  | 0.30601400  | 1.18049100  |
| H           | 3.10837000 | -3.66201400 | 5.19918300  | C           | 4.75266800  | -1.34459800 | 1.33155300  |
| Pd          | 4.54687100 | 0.91321200  | -0.05694100 | H           | 4.13229600  | -0.46513400 | 1.14959500  |
| C           | 3.38790600 | 3.03969200  | -1.49565900 | H           | 4.58469200  | -2.06856600 | 0.52785500  |
| C           | 4.61857000 | 2.84699200  | -0.77591900 | H           | 4.45351900  | -1.80693200 | 2.27740500  |
| C           | 4.64603000 | 3.13662400  | 0.62457600  |             |             |             |             |
| C           | 3.48773000 | 3.63215400  | 1.26859400  | <b>cat4</b> |             |             |             |
| C           | 2.32492300 | 3.84355000  | 0.54451200  | N           | -2.24044000 | -0.01949500 | 0.01981000  |
| C           | 2.27436500 | 3.53147500  | -0.82502800 | C           | -2.60864200 | -0.94157400 | -1.09420300 |
| H           | 5.59996400 | 3.18497000  | 1.13843100  | H           | -1.89132300 | -0.75674600 | -1.89915700 |
| H           | 3.53825300 | 3.88163600  | 2.32430000  | H           | -2.40625300 | -1.95555700 | -0.73241300 |
| H           | 1.44199000 | 4.24568600  | 1.03237500  | C           | -2.59720800 | 1.40820400  | -0.22751500 |
| H           | 1.36567600 | 3.67114800  | -1.40202400 | H           | -1.88986600 | 2.00816800  | 0.35247800  |
| O           | 3.29026900 | 2.85614700  | -2.84681600 | H           | -2.36911600 | 1.60335900  | -1.28098400 |
| C           | 3.46028900 | 1.52200600  | -3.33089600 | C           | -2.62335100 | -0.51676000 | 1.37332700  |
| H           | 4.46499500 | 1.13683200  | -3.12695600 | H           | -1.92282300 | -1.32057500 | 1.61820400  |
| H           | 2.71882400 | 0.85203800  | -2.87478700 | H           | -2.40886600 | 0.29863400  | 2.07257000  |
| H           | 3.30264200 | 1.56731600  | -4.41089900 | C           | -4.04913000 | -1.04768100 | 1.61259700  |
| I           | 6.52624600 | 3.08200400  | -1.89688400 | C           | -4.24996000 | -1.42766200 | 3.08577500  |
|             |            |             |             | H           | -4.21951800 | -1.93619400 | 0.99200400  |
| <b>cat3</b> |            |             |             | H           | -4.80783400 | -0.31390100 | 1.32459900  |
| C           | 3.56730500 | 3.15004400  | -1.35577800 | C           | -5.63553000 | -2.01949700 | 3.36191400  |
| C           | 4.00598600 | 3.53554200  | -0.03872600 | H           | -3.47534200 | -2.14675500 | 3.38509600  |

|    |             |             |             |             |            |             |             |
|----|-------------|-------------|-------------|-------------|------------|-------------|-------------|
| H  | -4.09741500 | -0.53847500 | 3.71275200  | H           | 4.78633300 | -0.47307900 | -1.27409500 |
| H  | -5.75897800 | -2.27969900 | 4.41832900  | C           | 5.57991800 | -2.40822900 | -3.11699400 |
| H  | -6.42689800 | -1.30847300 | 3.09789400  | H           | 3.41888800 | -2.51554500 | -3.10142200 |
| H  | -5.79942700 | -2.92870700 | 2.77214000  | H           | 4.05065700 | -0.95919500 | -3.61107900 |
| C  | -4.01664700 | 1.90830200  | 0.09997300  | H           | 5.68848600 | -2.78188000 | -4.14050000 |
| C  | -4.18248800 | 3.37729400  | -0.31197500 | H           | 6.38119900 | -1.68167700 | -2.93945500 |
| H  | -4.19904300 | 1.82133900  | 1.17823700  | H           | 5.74172100 | -3.25058600 | -2.43467300 |
| H  | -4.78387900 | 1.30739000  | -0.39724700 | C           | 4.01078100 | 1.88312700  | -0.33314400 |
| C  | -5.55944300 | 3.94419900  | 0.04722400  | C           | 4.19005000 | 3.39104200  | -0.11132800 |
| H  | -3.39916000 | 3.98006200  | 0.16741800  | H           | 4.17152400 | 1.66147900  | -1.39573100 |
| H  | -4.01722900 | 3.47015400  | -1.39416200 | H           | 4.78580000 | 1.34464000  | 0.22035200  |
| H  | -5.65600600 | 4.99097400  | -0.25926200 | C           | 5.55897300 | 3.89957100  | -0.57370900 |
| H  | -6.35912900 | 3.37718900  | -0.44325100 | H           | 3.39643900 | 3.93406100  | -0.64246300 |
| H  | -5.73572800 | 3.89484300  | 1.12792800  | H           | 4.05327100 | 3.61918800  | 0.95462300  |
| C  | -4.02236600 | -0.87691900 | -1.70247000 | H           | 5.66705600 | 4.97577700  | -0.40323900 |
| C  | -4.20498600 | -1.96506300 | -2.76922400 | H           | 6.36932000 | 3.39304800  | -0.03680200 |
| H  | -4.17794200 | 0.10421200  | -2.16815100 | H           | 5.70636900 | 3.71404000  | -1.64385000 |
| H  | -4.79918200 | -0.98843200 | -0.94002700 |             |            |             |             |
| C  | -5.57496500 | -1.90377600 | -3.45160500 | <b>cat5</b> |            |             |             |
| H  | -3.41246700 | -1.87128200 | -3.52409700 | Pd          | 4.60800200 | 1.29550700  | 0.68989700  |
| H  | -4.06800100 | -2.95182900 | -2.30608400 | O           | 4.77415500 | -0.76847400 | 1.12940800  |
| H  | -5.68537100 | -2.69134100 | -4.20429300 | C           | 5.68586300 | -1.48712100 | 0.58675500  |
| H  | -6.38398000 | -2.02301000 | -2.72173400 | O           | 6.56860200 | -1.10020900 | -0.21757300 |
| H  | -5.72231500 | -0.93991800 | -3.95225600 | C           | 5.68258800 | -2.96169000 | 0.98982400  |
| Pd | -0.00165200 | -0.02499100 | 0.02682100  | H           | 4.76587300 | -3.23422900 | 1.51664200  |
| N  | 2.23789100  | -0.01467000 | 0.01659600  | H           | 5.81584400 | -3.59065300 | 0.10481800  |
| C  | 2.59721600  | 1.43187700  | 0.07958500  | H           | 6.53598100 | -3.14846900 | 1.65066100  |
| H  | 1.88045800  | 1.95749900  | -0.55809300 | K           | 6.91161300 | 1.29394600  | -1.06500900 |
| H  | 2.38734800  | 1.75545800  | 1.10471500  | C           | 3.44613800 | 3.45578900  | -1.00875600 |
| C  | 2.60035700  | -0.67755400 | -1.26991600 | O           | 4.41483000 | 3.19623500  | -0.21094500 |
| H  | 1.89833200  | -1.50626300 | -1.40046100 | O           | 2.52249200 | 2.67647300  | -1.34850600 |
| H  | 2.37108300  | 0.04351400  | -2.06196400 | C           | 3.43130100 | 4.87429300  | -1.57808700 |
| C  | 2.62093200  | -0.79093800 | 1.23161400  | H           | 3.21194500 | 4.84459300  | -2.64926100 |
| H  | 1.92109000  | -0.49797900 | 2.01972100  | H           | 2.62409000 | 5.43803800  | -1.09789400 |
| H  | 2.40383500  | -1.84067900 | 1.00637300  | H           | 4.37524800 | 5.39206000  | -1.39619200 |
| C  | 4.04682100  | -0.66230300 | 1.79985200  | K           | 2.19384100 | 0.26823100  | -0.53452500 |
| C  | 4.24636400  | -1.60688300 | 2.99292400  |             |            |             |             |
| H  | 4.21829900  | 0.36852700  | 2.13390300  | <b>cat6</b> |            |             |             |
| H  | 4.80661600  | -0.87701600 | 1.04249600  | Pd          | 4.82171100 | 1.35012900  | 0.11999000  |
| C  | 5.63228600  | -1.47270300 | 3.63109000  | O           | 4.87284400 | -0.74148500 | 0.30393700  |
| H  | 3.47243300  | -1.40938900 | 3.74713300  | C           | 6.02124500 | -1.43438100 | 0.69572800  |
| H  | 4.09165700  | -2.64351000 | 2.66349900  | O           | 6.79160200 | -1.83201700 | -0.22690300 |
| H  | 5.75297600  | -2.15641000 | 4.47781600  | K           | 5.67410200 | -0.71758300 | -2.13972300 |
| H  | 6.42316600  | -1.69608800 | 2.90577700  | O           | 6.16369900 | -1.65040700 | 1.93504400  |
| H  | 5.79984400  | -0.45351600 | 3.99795000  | K           | 4.23610600 | -0.32553600 | 2.75926200  |
| C  | 4.02349800  | -1.23317400 | -1.46736900 | C           | 2.10140100 | 3.18133200  | -0.71015700 |
| C  | 4.20322800  | -1.77549500 | -2.89178900 | H           | 2.76279500 | 2.33348200  | -0.48778400 |
| H  | 4.20289500  | -2.04743800 | -0.75427400 | H           | 1.25591300 | 3.17354000  | -0.01060800 |

|             |             |             |             |             |             |             |             |
|-------------|-------------|-------------|-------------|-------------|-------------|-------------|-------------|
| H           | 1.70792900  | 3.07588000  | -1.72949700 | H           | -4.25530300 | 2.01201800  | 1.23725600  |
| N           | 2.83165300  | 4.43861000  | -0.58828700 | C           | -2.10855200 | 3.22140200  | -0.28410800 |
| C           | 2.02823300  | 5.61877900  | -0.87514400 | O           | -0.95479400 | 2.96320000  | -0.73408400 |
| H           | 2.58718300  | 6.53976400  | -0.72800700 | C           | -2.42643000 | 4.59648500  | 0.28367200  |
| H           | 1.66911900  | 5.59447700  | -1.91250100 | H           | -1.49411900 | 5.15854800  | 0.32351000  |
| H           | 1.15084200  | 5.64309400  | -0.21685300 | H           | -3.14001800 | 5.12329900  | -0.36223500 |
| C           | 4.15933500  | 4.47838600  | -0.27802100 | H           | -2.84669800 | 4.54241500  | 1.29045100  |
| O           | 4.85192500  | 3.47433500  | -0.05009400 | C           | 1.18289400  | -0.77512700 | 2.08453300  |
| C           | 4.84546200  | 5.83345500  | -0.19983200 | H           | 1.76656000  | -0.06733800 | 2.67008600  |
| H           | 5.88929200  | 5.64954200  | 0.05085400  | H           | 1.59787300  | -1.78047800 | 2.19541900  |
| H           | 4.79686300  | 6.37175500  | -1.15190800 | H           | 1.23358700  | -0.47289000 | 1.02736500  |
| H           | 4.40188500  | 6.46984200  | 0.57294700  | N           | -0.19727300 | -0.77049400 | 2.56166500  |
| <b>cat7</b> |             |             |             | C           | -1.04647100 | -1.81453800 | 2.00568100  |
| Pd          | 4.99161400  | 1.44831700  | 0.32611200  | H           | -1.96169800 | -1.93097600 | 2.58656000  |
| O           | 4.88004700  | -0.59355600 | 0.70280100  | H           | -1.31523300 | -1.60111100 | 0.95888000  |
| C           | 5.75501300  | -1.50573400 | 0.53477600  | H           | -0.50982600 | -2.76633400 | 2.03545900  |
| O           | 6.91814600  | -1.36625200 | 0.07565600  | C           | -0.72979400 | 0.43914700  | 2.93669800  |
| C           | 5.32480100  | -2.91159200 | 0.95168900  | O           | 0.02014800  | 1.43404200  | 3.14970900  |
| H           | 5.96634000  | -3.25217000 | 1.77135200  | C           | -2.19039500 | 0.47525400  | 3.36192100  |
| H           | 4.28167500  | -2.93594600 | 1.27005300  | H           | -2.40571400 | 1.48875500  | 3.69792200  |
| H           | 5.47830800  | -3.60077000 | 0.11557200  | H           | -2.86691900 | 0.22270800  | 2.54232900  |
| K           | 7.75598400  | 0.89330500  | -0.55717500 | H           | -2.37021000 | -0.22691800 | 4.18569000  |
| C           | 2.32386500  | 3.24797100  | -0.37483200 | Pd          | -0.42989900 | 2.22609600  | 1.21505400  |
| H           | 2.98311200  | 2.39417100  | -0.17399300 | <b>int1</b> |             |             |             |
| H           | 1.64427400  | 3.38341400  | 0.47568400  | C           | 2.92818400  | 2.32467600  | -0.90642900 |
| H           | 1.72901200  | 3.03852000  | -1.27095300 | C           | 2.08596500  | 1.46689700  | -0.20999500 |
| N           | 3.10953800  | 4.46276700  | -0.58397300 | C           | 0.80048000  | 1.82178200  | 0.14004300  |
| C           | 2.29929300  | 5.63770200  | -0.88057800 | C           | 0.40668300  | 3.11726300  | -0.25931200 |
| H           | 2.90634700  | 6.49397000  | -1.16536400 | C           | 1.27166000  | 3.96732600  | -0.96050800 |
| H           | 1.62141900  | 5.41231800  | -1.71151500 | C           | 2.58585700  | 3.59855800  | -1.31706800 |
| H           | 1.68719000  | 5.91641400  | -0.01231600 | H           | 0.12278900  | 1.17036500  | 0.68367700  |
| C           | 4.45553500  | 4.50730400  | -0.38792300 | H           | -0.59267000 | 3.46636400  | -0.01804600 |
| O           | 5.15490800  | 3.52807500  | -0.07485500 | H           | 0.91607000  | 4.95430300  | -1.24331600 |
| C           | 5.16827300  | 5.83862300  | -0.57178400 | H           | 3.24832300  | 4.26305500  | -1.85978100 |
| H           | 6.22496700  | 5.66938600  | -0.36783900 | O           | 4.02939000  | 1.48116100  | -0.97397800 |
| H           | 5.06057500  | 6.22222300  | -1.59175000 | C           | 3.22696300  | 0.46962300  | -0.22796500 |
| H           | 4.79340100  | 6.60125000  | 0.11810700  | H           | 3.09596300  | -0.43409200 | -0.83048300 |
| <b>cat8</b> |             |             |             | H           | 3.70428000  | 0.23232200  | 0.72732100  |
| C           | -2.83918700 | 1.04463700  | -1.04772800 | <b>int2</b> |             |             |             |
| H           | -2.00899500 | 1.11803800  | -1.74799100 | C           | 2.90674300  | 2.29118200  | -0.92068700 |
| H           | -2.53143200 | 0.37916500  | -0.22494300 | C           | 2.07515200  | 1.45041700  | -0.19766700 |
| H           | -3.71463200 | 0.62315500  | -1.54921100 | C           | 0.79793300  | 1.82146000  | 0.17222300  |
| N           | -3.16487600 | 2.37517100  | -0.54927100 | C           | 0.41580600  | 3.11312000  | -0.24338500 |
| C           | -4.38686500 | 2.45711900  | 0.23818200  | C           | 1.27905000  | 3.94139800  | -0.97478900 |
| H           | -4.71062900 | 3.49102800  | 0.35845100  | C           | 2.58673400  | 3.56749100  | -1.35586000 |
| H           | -5.18416400 | 1.91654400  | -0.27892500 | H           | 0.12270200  | 1.18657200  | 0.73755700  |

|             |             |             |             |              |             |             |             |
|-------------|-------------|-------------|-------------|--------------|-------------|-------------|-------------|
| H           | -0.57456500 | 3.48153100  | 0.00678600  | C            | 0.70042200  | 2.72789200  | 0.18639400  |
| H           | 0.92687300  | 4.92781200  | -1.26821300 | C            | 1.62528300  | 2.77452800  | -0.86449200 |
| O           | 4.00467900  | 1.43950200  | -1.00129300 | H            | 2.81607400  | 3.14092800  | 2.81270900  |
| C           | 3.20988000  | 0.44532100  | -0.22542900 | H            | 0.39722300  | 2.81161000  | 2.32123000  |
| H           | 3.06097900  | -0.46624000 | -0.81184600 | H            | -0.35433100 | 2.61560600  | -0.04595900 |
| H           | 3.70436400  | 0.21802100  | 0.72369400  | H            | 1.27215600  | 2.69141000  | -1.88559300 |
| C           | 3.52304300  | 4.44796800  | -2.13780700 | O            | 3.95121100  | 3.00715800  | -1.56309200 |
| H           | 4.42231100  | 4.68518400  | -1.55765200 | C            | 3.56133200  | 2.90845400  | -2.92518500 |
| H           | 3.85774100  | 3.95341500  | -3.05656400 | H            | 3.09313400  | 1.93918000  | -3.14075000 |
| H           | 3.04076900  | 5.38955600  | -2.41456500 | H            | 2.87295000  | 3.71478400  | -3.20838900 |
|             |             |             |             | H            | 4.48126500  | 3.00129200  | -3.50396800 |
| <b>5</b>    |             |             |             | I            | 5.44390600  | 4.19111000  | 1.17490500  |
| Pd          | 5.44334500  | 1.59907000  | -0.43053400 |              |             |             |             |
| O           | 6.16448200  | -0.45599400 | -0.33275500 | <b>6-TS'</b> |             |             |             |
| C           | 5.30622100  | -0.87088400 | 0.62940200  | Pd           | 0.55803800  | 0.33599600  | 0.07699400  |
| O           | 5.63609100  | -0.69447300 | 1.86508500  | C            | -1.89332500 | 1.76443200  | 0.62092700  |
| K           | 7.83676000  | 0.46506400  | 1.35234600  | C            | -1.31459400 | 0.83787000  | -0.30143900 |
| C           | 2.94139100  | 2.29637100  | -1.12215400 | C            | -1.13498700 | 1.21740800  | -1.66119500 |
| O           | 3.82217700  | 3.03929100  | -0.40912600 | C            | -1.43337600 | 2.51629900  | -2.08159300 |
| O           | 2.13836700  | 1.52189400  | -0.50304800 | C            | -1.98088700 | 3.42027000  | -1.16995800 |
| K           | 3.21567600  | 0.76609700  | 1.74826500  | C            | -2.19904000 | 3.05104900  | 0.15737200  |
| O           | 4.18230600  | -1.36993800 | 0.28753000  | H            | -0.84117300 | 0.46431500  | -2.38384200 |
| O           | 2.98523300  | 2.36186300  | -2.41059300 | H            | -1.27898000 | 2.79617500  | -3.11895000 |
| K           | 4.94190400  | 3.98658500  | -2.48746600 | H            | -2.24453700 | 4.42400500  | -1.49040400 |
| K           | 3.44936200  | -0.39300900 | -2.01218900 | H            | -2.60972000 | 3.75240500  | 0.87736100  |
|             |             |             |             | O            | -2.18643400 | 1.53847700  | 1.92349000  |
| <b>6-TS</b> |             |             |             | C            | -1.49134100 | 0.55618600  | 2.68673900  |
| C           | 6.34204900  | -0.46595100 | -0.30279700 | H            | -1.90212600 | -0.44433400 | 2.53509300  |
| C           | 6.31260800  | -0.18046500 | 1.09760200  | H            | -0.42270700 | 0.54128500  | 2.41270900  |
| C           | 5.29132200  | -0.75250300 | 1.89903300  | H            | -1.61259500 | 0.85173200  | 3.73200500  |
| C           | 4.34569400  | -1.63125900 | 1.31949600  | I            | -2.17234500 | -1.52733000 | -0.20106900 |
| C           | 4.41329800  | -1.93131600 | -0.03216000 | O            | 2.41945100  | -0.55780900 | 0.59324000  |
| C           | 5.39611500  | -1.33489600 | -0.83818000 | C            | 3.40303300  | -0.86070100 | -0.35737300 |
| H           | 5.34174100  | -0.65565900 | 2.97848600  | O            | 3.37009600  | -2.01702200 | -0.86122900 |
| H           | 3.59128200  | -2.08316800 | 1.95522800  | K            | 1.34768100  | -2.96700800 | 0.21676100  |
| H           | 3.70065600  | -2.61925700 | -0.47639900 | O            | 4.25697700  | 0.04301400  | -0.58919200 |
| H           | 5.45228700  | -1.53668600 | -1.90290100 | K            | 3.47271400  | 1.76348400  | 1.00099400  |
| O           | 7.30021700  | 0.03679400  | -1.13126800 |              |             |             |             |
| C           | 7.20663600  | 1.44806200  | -1.39919800 | <b>7</b>     |             |             |             |
| H           | 7.42698100  | 2.04709400  | -0.51113600 | C            | 7.19638900  | 0.03084300  | 0.28843400  |
| H           | 6.20217500  | 1.70671700  | -1.75276200 | C            | 6.12659300  | 0.16721200  | 1.18403200  |
| H           | 7.94765600  | 1.65524500  | -2.17333800 | C            | 4.80225100  | 0.19630100  | 0.71443100  |
| I           | 8.11237000  | 0.52918700  | 2.07142600  | C            | 4.52913700  | 0.06136300  | -0.66781800 |
| Pd          | 4.69878500  | 1.44498500  | 1.20508800  | C            | 5.60846100  | -0.09758500 | -1.56054000 |
| C           | 2.98984400  | 2.92487800  | -0.60429200 | C            | 6.91538400  | -0.09865900 | -1.09385600 |
| C           | 3.42181300  | 2.99739900  | 0.74975800  | H            | 3.98340100  | 0.23880900  | 1.42249700  |
| C           | 2.47887200  | 2.99123100  | 1.79313700  | H            | 3.50672700  | -0.01196500 | -1.01909700 |
| C           | 1.11743600  | 2.83218400  | 1.50937900  | H            | 5.41625700  | -0.20679600 | -2.62249300 |

|          |             |             |             |               |             |             |             |
|----------|-------------|-------------|-------------|---------------|-------------|-------------|-------------|
| H        | 7.73075700  | -0.20027200 | -1.79925200 | K             | 2.34258700  | 2.24150300  | 1.71250200  |
| O        | 8.44414000  | 0.03549100  | 0.80101600  |               |             |             |             |
| C        | 9.56279900  | -0.03982800 | -0.07809100 | <b>9-TS</b>   |             |             |             |
| H        | 9.57825000  | 0.80359900  | -0.77882200 | Pd            | -1.13619000 | -0.79871200 | 0.46240500  |
| H        | 9.57289700  | -0.98386300 | -0.63666300 | C             | -3.90127000 | -0.39873400 | -0.24733700 |
| H        | 10.44206100 | 0.00821300  | 0.56446200  | C             | -2.70841300 | 0.33846300  | -0.03717100 |
| I        | 6.47994600  | 0.40021300  | 3.26680300  | C             | -2.75242400 | 1.72556600  | -0.23394600 |
| Pd       | 4.66391000  | 2.42347700  | -0.30253000 | C             | -3.92309800 | 2.35997100  | -0.66405300 |
| C        | 1.75049400  | 2.27614900  | -0.56193900 | C             | -5.08270600 | 1.61201900  | -0.88339900 |
| C        | 2.79638200  | 2.60006000  | 0.31726700  | C             | -5.07750900 | 0.23629400  | -0.66782900 |
| C        | 2.53937700  | 2.97652100  | 1.62934600  | H             | -1.86088900 | 2.31692700  | -0.06135200 |
| C        | 1.21862400  | 3.00469700  | 2.09991700  | H             | -3.92439200 | 3.43474700  | -0.82341700 |
| C        | 0.17549800  | 2.67913100  | 1.23823800  | H             | -5.99720500 | 2.10027400  | -1.20891600 |
| C        | 0.43307400  | 2.31537600  | -0.08701300 | H             | -5.97180200 | -0.36480200 | -0.80102600 |
| H        | 3.35755500  | 3.25953300  | 2.28315400  | O             | -3.95578800 | -1.74611200 | -0.07083900 |
| H        | 1.01915300  | 3.29662700  | 3.12637100  | C             | -2.82299900 | -2.29652000 | 0.59751600  |
| H        | -0.85212400 | 2.70812700  | 1.58844000  | H             | -1.83083800 | -2.51867300 | -0.25369500 |
| H        | -0.39317400 | 2.06613500  | -0.74298500 | H             | -2.79578000 | -1.98842100 | 1.65468100  |
| O        | 2.09933000  | 1.90822200  | -1.83515200 | H             | -2.95104200 | -3.38393300 | 0.61662200  |
| C        | 1.06521300  | 1.75741100  | -2.79736200 | C             | 0.24230800  | -2.85747800 | -0.76166200 |
| H        | 0.40620800  | 0.91146400  | -2.55909900 | O             | -0.96635800 | -3.07977300 | -1.22601000 |
| H        | 0.46224000  | 2.66980100  | -2.88409400 | O             | 1.25069200  | -2.89449800 | -1.53597200 |
| H        | 1.56600600  | 1.56489900  | -3.74736200 | O             | 0.36163600  | -2.48125900 | 0.49511600  |
| I        | 4.93724500  | 5.00586100  | -0.66822800 | K             | 2.83889100  | -1.88746700 | 0.29207900  |
|          |             |             |             | I             | 0.86006200  | 1.08385600  | 0.13432700  |
| <b>8</b> |             |             |             | K             | -0.67232800 | -1.04056700 | -2.80968300 |
| Pd       | 0.44613200  | -0.50654400 | -0.47152000 |               |             |             |             |
| C        | -0.96646500 | 1.95999000  | 0.28093700  | <b>9-TS-a</b> |             |             |             |
| C        | -0.79732700 | 1.01691300  | -0.74444700 | Pd            | -1.14959300 | -0.64136700 | 0.24083700  |
| C        | -1.41213200 | 1.28591700  | -1.97470600 | C             | -4.03396600 | -0.27277600 | 0.10635100  |
| C        | -2.14171700 | 2.46201400  | -2.18000300 | C             | -2.83145600 | 0.41360300  | 0.36484700  |
| C        | -2.28149000 | 3.39415400  | -1.15008500 | C             | -2.87357100 | 1.77618400  | 0.65277500  |
| C        | -1.69610700 | 3.13502500  | 0.09011300  | C             | -4.08911100 | 2.47240800  | 0.62400400  |
| H        | -1.31729500 | 0.56810900  | -2.78389900 | C             | -5.27030100 | 1.78475800  | 0.33374800  |
| H        | -2.60161100 | 2.64741500  | -3.14736400 | C             | -5.25240400 | 0.41243100  | 0.08410700  |
| H        | -2.84741300 | 4.30839500  | -1.30484700 | H             | -1.95136200 | 2.31724800  | 0.86711500  |
| H        | -1.79855700 | 3.82843500  | 0.92132500  | H             | -4.10767300 | 3.54170800  | 0.81338400  |
| O        | -0.37949100 | 1.77497300  | 1.54926800  | H             | -6.21681500 | 2.31732700  | 0.31497900  |
| C        | -1.13854600 | 0.89129900  | 2.38895100  | H             | -6.16483300 | -0.14190000 | -0.11150400 |
| H        | -2.13328100 | 1.30978400  | 2.58729100  | O             | -4.03150400 | -1.61127200 | -0.14621000 |
| H        | -1.24306400 | -0.09464800 | 1.92355400  | C             | -2.85955200 | -2.28642600 | 0.25923400  |
| H        | -0.59103200 | 0.79591700  | 3.33204800  | H             | -1.88168300 | -2.18959100 | -0.51251500 |
| I        | -1.48326100 | -2.43284700 | -0.57401800 | H             | -2.71475500 | -2.25303200 | 1.34640000  |
| O        | 2.14379300  | 0.65400200  | -0.20840200 | H             | -2.95754300 | -3.33710600 | -0.02997200 |
| C        | 2.84577100  | -0.31763900 | 0.38231500  | C             | 0.44334000  | -2.70166800 | -0.95346400 |
| O        | 2.37970900  | -1.52070900 | 0.14532100  | O             | -0.71966500 | -2.85222200 | -1.44579300 |
| K        | 1.67710100  | -3.82730200 | -0.08996500 | O             | 1.46897900  | -3.37729600 | -1.25448900 |
| O        | 3.79352000  | -0.04395800 | 1.14307100  | O             | 0.61359400  | -1.71439600 | -0.01096700 |



|               |             |             |             |           |             |             |             |
|---------------|-------------|-------------|-------------|-----------|-------------|-------------|-------------|
| K             | 3.07519000  | -2.26748700 | 0.25072800  | C         | -4.68384100 | -0.26439100 | -0.74653400 |
|               |             |             |             | H         | -1.95973100 | 2.20638900  | 0.56387500  |
| <b>9-TS-b</b> |             |             |             | H         | -3.50642500 | 2.90029800  | -1.26826300 |
| Pd            | -1.20862400 | -0.60173100 | 0.41831700  | H         | -5.22773100 | 1.31134700  | -2.10704900 |
| C             | -3.99532800 | -0.23145500 | -0.31577900 | H         | -5.45131300 | -0.95544500 | -1.08071000 |
| C             | -2.86376800 | 0.51475300  | 0.08376100  | O         | -3.86101800 | -1.87612900 | 0.83215300  |
| C             | -3.02595000 | 1.89733600  | 0.23359100  | C         | -3.07208600 | -1.90591800 | 2.05805700  |
| C             | -4.24170200 | 2.53315000  | -0.04414300 | H         | -2.54784200 | -2.89351600 | -0.41147100 |
| C             | -5.33401800 | 1.77522900  | -0.46788300 | H         | -3.73318600 | -1.67889600 | 2.90284700  |
| C             | -5.21678200 | 0.39251200  | -0.59356200 | H         | -2.64460400 | -2.90930200 | 2.13357900  |
| H             | -2.19154900 | 2.51689100  | 0.55700400  | C         | -0.62273000 | -3.04967500 | -0.46423600 |
| H             | -4.32717600 | 3.61089000  | 0.06326000  | O         | -1.83595300 | -2.71081700 | -1.05091800 |
| H             | -6.28294200 | 2.25611600  | -0.68779100 | O         | 0.38193700  | -2.58564600 | -1.08257100 |
| H             | -6.05856300 | -0.22396300 | -0.89321600 | O         | -0.63969300 | -3.70513200 | 0.60088700  |
| O             | -3.94707600 | -1.58514700 | -0.45111600 | K         | 1.80762600  | -2.88548100 | 1.12008700  |
| C             | -2.86683600 | -2.21441300 | 0.21985100  | I         | 1.09968800  | 0.53158800  | 1.86151500  |
| H             | -1.75476200 | -2.25888500 | -0.39513600 | K         | -0.79066500 | -0.26475300 | -1.64404000 |
| H             | -2.94023700 | -2.08042000 | 1.30973500  |           |             |             |             |
| H             | -2.95426400 | -3.28982600 | 0.03744800  | <b>11</b> |             |             |             |
| C             | 0.37011600  | -2.97045100 | -0.08040500 | Pd        | 8.91556400  | 1.95526700  | -1.43011300 |
| O             | -0.54231900 | -2.99217700 | -0.97575200 | C         | 6.42362900  | 1.13940100  | -2.55315600 |
| O             | 1.31144900  | -3.80383500 | 0.03927000  | C         | 5.23431500  | 1.12944000  | -3.28022300 |
| O             | 0.31948600  | -1.96902700 | 0.84560800  | C         | 4.78993600  | 2.32593500  | -3.85789000 |
| K             | 2.14758100  | -2.99697500 | 2.25887400  | C         | 5.50909200  | 3.50863700  | -3.67980200 |
| C             | 1.42708700  | 0.63504300  | 1.46544100  | C         | 6.69843800  | 3.50136000  | -2.93075500 |
| C             | 2.51697000  | 0.37447100  | 0.63577600  | C         | 7.19622000  | 2.31169000  | -2.38462300 |
| C             | 2.41666800  | 0.49583100  | -0.75366900 | H         | 3.86715600  | 2.33129000  | -4.43168800 |
| C             | 1.23781000  | 0.93828900  | -1.33962700 | H         | 5.14982200  | 4.43567900  | -4.11863400 |
| C             | 0.16100800  | 1.31295800  | -0.52602600 | H         | 7.24673800  | 4.42958800  | -2.77810900 |
| C             | 0.23331200  | 1.15000800  | 0.88022400  | O         | 6.90725400  | -0.00811400 | -1.98079100 |
| H             | 3.26966600  | 0.24419600  | -1.37403700 | C         | 7.81682100  | 0.33563700  | -0.90081900 |
| H             | 1.16440400  | 1.02482400  | -2.41752000 | H         | 7.22977500  | 0.57202800  | -0.00242800 |
| H             | -0.69963100 | 1.80362500  | -0.96192800 | H         | 8.44572300  | -0.53945200 | -0.71052400 |
| H             | -0.49823200 | 1.63122600  | 1.51891300  | C         | 10.43021300 | 3.04748900  | -3.76331400 |
| O             | 1.55052900  | 0.37778700  | 2.78764700  | O         | 9.35851300  | 2.92700700  | -4.62921000 |
| I             | 4.40727100  | -0.18851500 | 1.48703900  | O         | 10.21198000 | 3.56386600  | -2.61858200 |
| C             | 0.40344400  | 0.54386100  | 3.62496500  | H         | 8.56107700  | 3.24553000  | -4.16851000 |
| H             | -0.43574700 | -0.06035800 | 3.25826800  | C         | 11.07542100 | -0.01859300 | -0.75115500 |
| H             | 0.71121700  | 0.20451000  | 4.61468800  | O         | 10.73903700 | 1.22292200  | -0.43695100 |
| H             | 0.10104300  | 1.59513300  | 3.68677800  | O         | 11.04066700 | -0.92214800 | 0.15826300  |
| <b>10</b>     |             |             |             | K         | 12.69242200 | 2.52543000  | -1.80376000 |
| Pd            | -1.51957100 | -0.57943700 | 2.01792100  | I         | 14.59942500 | 0.82004700  | 0.91774000  |
| C             | -3.80938500 | -0.64118700 | 0.27480900  | K         | 11.17497500 | 0.83983500  | 2.08452200  |
| C             | -2.79265900 | 0.22665800  | 0.73032400  | O         | 11.49942700 | 2.55669600  | -4.18756500 |
| C             | -2.71247000 | 1.51524000  | 0.19279200  | K         | 9.77799400  | 0.15194600  | -3.90115700 |
| C             | -3.58216600 | 1.90310900  | -0.84297100 | O         | 11.50488500 | -0.27474400 | -1.94580700 |
| C             | -4.55200800 | 1.00952100  | -1.31158400 | K         | 13.23147300 | -1.92956500 | -0.81317000 |
|               |             |             |             | H         | 4.66472000  | 0.20959500  | -3.37628600 |

**12-TS**

|    |            |             |             |
|----|------------|-------------|-------------|
| C  | 3.74065900 | 2.45120700  | -3.44920400 |
| C  | 3.27775500 | 2.49731300  | -2.11705000 |
| C  | 2.01024300 | 1.96357100  | -1.85234100 |
| C  | 1.27770200 | 1.31771900  | -2.86282900 |
| C  | 1.80215700 | 1.22139800  | -4.15715700 |
| C  | 3.03380800 | 1.80641300  | -4.46483700 |
| H  | 1.60474900 | 2.02939400  | -0.84728500 |
| H  | 0.30003600 | 0.89821500  | -2.63808500 |
| H  | 1.23777500 | 0.71978800  | -4.93837300 |
| H  | 3.43300400 | 1.78750100  | -5.47420300 |
| O  | 4.93516700 | 3.06048700  | -3.72210500 |
| C  | 5.22012600 | 4.03535300  | -2.69187000 |
| H  | 4.64145100 | 4.94670100  | -2.88648400 |
| Pd | 4.64195000 | 3.31700600  | -0.83504500 |
| C  | 4.81356700 | 5.45213400  | 0.45805100  |
| H  | 3.89136300 | 5.29489900  | -0.09706400 |
| H  | 4.72300200 | 5.27222300  | 1.52171900  |
| H  | 5.36874000 | 6.33109700  | 0.15546800  |
| H  | 6.28784200 | 4.26480300  | -2.74795500 |
| I  | 7.05992200 | 4.11030400  | 0.33851300  |
| K  | 3.47553800 | -0.83147200 | -1.22049400 |
| I  | 3.56609700 | 2.12936600  | 1.56328800  |
| C  | 6.34671900 | -0.64536900 | -1.03434600 |
| O  | 5.73067500 | -1.24310100 | -0.05977000 |
| O  | 7.44066900 | 0.02612200  | -0.80204800 |
| K  | 6.73154800 | 0.36368000  | 1.65103800  |
| O  | 5.82392400 | -0.64287400 | -2.22909400 |
| K  | 7.19101900 | 1.34671000  | -2.97503900 |

**12-TS-a**

|    |            |             |             |
|----|------------|-------------|-------------|
| C  | 5.07977100 | 1.76794300  | -3.08755800 |
| C  | 4.25926800 | 1.75690600  | -1.93472300 |
| C  | 3.39166800 | 0.66360300  | -1.77007800 |
| C  | 3.41373300 | -0.41349100 | -2.66719500 |
| C  | 4.27252300 | -0.39008700 | -3.77231800 |
| C  | 5.10189700 | 0.70875300  | -4.00079300 |
| H  | 2.70916300 | 0.64899900  | -0.92500800 |
| H  | 2.75353200 | -1.26197400 | -2.50853500 |
| H  | 4.27996400 | -1.22045600 | -4.47311700 |
| H  | 5.74296300 | 0.76620700  | -4.87486500 |
| O  | 5.88926300 | 2.83964100  | -3.26971300 |
| C  | 5.42271900 | 3.95991600  | -2.52337900 |
| H  | 4.60497300 | 4.45769300  | -3.06218300 |
| Pd | 4.54221400 | 3.40153200  | -0.72826900 |
| C  | 4.06954600 | 5.57597300  | 0.18341800  |
| H  | 3.31207500 | 5.15371700  | -0.48873300 |

|   |            |            |             |
|---|------------|------------|-------------|
| H | 3.76249500 | 5.57026800 | 1.22211600  |
| H | 4.49545700 | 6.50076400 | -0.18750200 |
| H | 6.26606700 | 4.63401100 | -2.37360500 |
| I | 6.47635700 | 4.76250800 | 0.76927300  |
| K | 5.89552400 | 0.68028600 | 0.36163900  |
| I | 3.17393800 | 2.33008100 | 1.62323100  |

**12-TS-b**

|    |            |             |             |
|----|------------|-------------|-------------|
| C  | 4.24384900 | 2.11434000  | -3.40266300 |
| C  | 3.93808700 | 2.06317000  | -2.02453700 |
| C  | 2.71879500 | 1.49296200  | -1.63851200 |
| C  | 1.88314400 | 0.88222800  | -2.58988100 |
| C  | 2.24638000 | 0.88052400  | -3.93941600 |
| C  | 3.42024500 | 1.51248600  | -4.35855300 |
| H  | 2.42411600 | 1.49767700  | -0.58995000 |
| H  | 0.94962000 | 0.42502300  | -2.27203800 |
| H  | 1.59830700 | 0.41490100  | -4.67732300 |
| H  | 3.68938500 | 1.56983600  | -5.40880100 |
| O  | 5.36370100 | 2.77489800  | -3.77661900 |
| C  | 5.78724200 | 3.68674700  | -2.74426600 |
| H  | 5.28979900 | 4.65511000  | -2.89341300 |
| Pd | 5.33713900 | 2.98062900  | -0.87056700 |
| C  | 4.34896000 | 5.10562200  | 0.21378200  |
| H  | 4.00587800 | 4.39267500  | 0.97257100  |
| H  | 4.54635600 | 6.11220300  | 0.55838300  |
| H  | 3.90674600 | 5.06006300  | -0.77404600 |
| H  | 6.86906100 | 3.80796900  | -2.84021900 |
| I  | 7.02455000 | 4.97709600  | 0.31016300  |
| C  | 3.83826900 | 1.93032000  | 1.68255200  |
| O  | 3.60631500 | 2.97392000  | 2.38627200  |
| O  | 3.06749200 | 0.93490800  | 1.56039400  |
| O  | 5.05366900 | 1.88049800  | 1.04782100  |
| K  | 4.47819300 | -0.37930400 | -0.12195700 |
| K  | 6.01220700 | 3.11125200  | 3.15078700  |

**12-TS-c**

|   |            |             |             |
|---|------------|-------------|-------------|
| C | 3.40948700 | 2.88753600  | -3.31520800 |
| C | 3.57325400 | 2.18596900  | -2.10026700 |
| C | 2.90678100 | 0.96192000  | -1.95954900 |
| C | 2.03095400 | 0.49285500  | -2.95164800 |
| C | 1.84767800 | 1.24039900  | -4.11960600 |
| C | 2.54748900 | 2.43371400  | -4.31846800 |
| H | 3.05309600 | 0.37268800  | -1.05558500 |
| H | 1.50325200 | -0.44696100 | -2.81262700 |
| H | 1.17566800 | 0.88057100  | -4.89408200 |
| H | 2.44969900 | 2.99986800  | -5.23963500 |
| O | 4.11506800 | 4.03212100  | -3.47539900 |
| C | 5.24776400 | 4.06119400  | -2.58143500 |

|                |            |             |             |           |             |             |             |
|----------------|------------|-------------|-------------|-----------|-------------|-------------|-------------|
| H              | 5.52352200 | 5.10886500  | -2.44427100 | C         | 3.53960200  | 2.54816400  | -3.24899200 |
| Pd             | 4.82985600 | 3.12496500  | -0.80988200 | C         | 3.21095400  | 2.66233800  | -1.88176700 |
| C              | 4.27970500 | 5.29442500  | 0.33916700  | C         | 1.87020200  | 2.49298300  | -1.51591900 |
| H              | 3.79306200 | 5.36391900  | -0.62851100 | C         | 0.90378800  | 2.13580300  | -2.47365300 |
| H              | 3.77066700 | 4.73882100  | 1.12753100  | C         | 1.27351600  | 1.97466200  | -3.81359400 |
| H              | 4.73862700 | 6.22585500  | 0.64193300  | C         | 2.59570100  | 2.19496600  | -4.21503600 |
| H              | 6.08160300 | 3.50865900  | -3.03440000 | H         | 1.58241800  | 2.60516200  | -0.47410300 |
| I              | 6.78296700 | 4.43569400  | 0.62879700  | H         | -0.13031600 | 1.99176600  | -2.17130900 |
| C              | 3.92709700 | 2.30123000  | 2.14024800  | H         | 0.52815900  | 1.70205800  | -4.55566400 |
| O              | 4.19630000 | 1.88905900  | 0.91075900  | H         | 2.89478000  | 2.10743000  | -5.25479800 |
| O              | 3.03535300 | 3.22284900  | 2.31633500  | O         | 4.84357900  | 2.73911600  | -3.59781700 |
| K              | 4.78959900 | -0.47230000 | 1.71677400  | C         | 5.54836900  | 3.48800000  | -2.58452700 |
| I              | 1.15725300 | -0.47540100 | 2.46579200  | H         | 5.44442100  | 4.56042100  | -2.78654200 |
| K              | 1.51728200 | 2.40460100  | 0.28245400  | Pd        | 4.82307000  | 3.06561100  | -0.70784900 |
| O              | 4.47971000 | 1.69399400  | 3.12472100  | C         | 4.66237000  | 5.38672700  | 0.23151200  |
| K              | 2.42064900 | 2.09948600  | 4.61075700  | H         | 4.46876300  | 5.67096400  | -0.79547600 |
| <b>12-TS-d</b> |            |             |             | H         | 3.87187200  | 4.86557700  | 0.76199900  |
| C              | 3.68591200 | 2.57083200  | -3.35372300 | H         | 5.15205800  | 6.15010200  | 0.81925600  |
| C              | 3.91956700 | 1.85539000  | -2.15480900 | H         | 6.58847200  | 3.16357500  | -2.60398700 |
| C              | 3.47513900 | 0.52614600  | -2.11569600 | I         | 7.03734000  | 4.23897100  | 0.55016700  |
| C              | 2.73198600 | -0.03341100 | -3.17094500 | K         | 3.05356300  | -0.46389200 | -1.29900400 |
| C              | 2.45679600 | 0.73441000  | -4.30930400 | I         | 3.76272800  | 1.73528300  | 1.71126600  |
| C              | 2.94922900 | 2.04108200  | -4.41819200 | C         | 6.03130600  | -0.14157300 | -1.76061100 |
| H              | 3.69663500 | -0.10408500 | -1.25480000 | O         | 5.62550600  | -1.00719100 | -0.93140800 |
| H              | 2.38351600 | -1.06066000 | -3.10717100 | O         | 7.00029600  | 0.64176900  | -1.65452500 |
| H              | 1.88818400 | 0.30643600  | -5.13021100 | K         | 6.97091000  | 0.33350400  | 0.96256200  |
| H              | 2.79068300 | 2.63410500  | -5.31333300 | O         | 5.22642000  | -0.03027000 | -2.89219000 |
| O              | 4.18038500 | 3.83343900  | -3.42426500 | H         | 5.47667000  | 0.79588600  | -3.34444300 |
| C              | 5.25003100 | 4.01335500  | -2.49194000 | <b>13</b> |             |             |             |
| H              | 5.36898100 | 5.08317400  | -2.32388300 | C         | 3.59478700  | 2.52675900  | -3.01072200 |
| Pd             | 4.84464700 | 3.03662200  | -0.75056200 | C         | 4.05968800  | 1.84264000  | -1.87315500 |
| C              | 3.42728800 | 5.08618200  | 0.02329800  | C         | 3.40007100  | 0.70095900  | -1.42260500 |
| H              | 3.09816000 | 4.82744600  | -0.97129300 | C         | 2.27426400  | 0.24684900  | -2.12277400 |
| H              | 3.06437800 | 4.54027800  | 0.88098600  | C         | 1.81725800  | 0.93246500  | -3.25333500 |
| H              | 3.68253100 | 6.12580300  | 0.16994900  | C         | 2.47497900  | 2.07472400  | -3.71197100 |
| H              | 6.17305700 | 3.55891300  | -2.86985700 | H         | 3.74211100  | 0.17668600  | -0.53497500 |
| I              | 6.12942500 | 4.81518300  | 0.88147300  | H         | 1.74958900  | -0.63917800 | -1.77577500 |
| C              | 2.69270200 | 2.12158900  | 1.59322400  | H         | 0.94163900  | 0.57333100  | -3.78689800 |
| O              | 3.88075100 | 1.58934100  | 1.05946200  | H         | 2.14072300  | 2.61307600  | -4.59296000 |
| O              | 2.84884300 | 2.97482400  | 2.48078100  | O         | 4.24791600  | 3.65656200  | -3.39235200 |
| K              | 0.87808700 | 2.24081000  | -1.41194400 | C         | 5.56726700  | 3.70405400  | -2.87126800 |
| I              | 0.11950000 | 5.41949300  | -0.21630500 | H         | 5.86879000  | 4.74455500  | -2.75922200 |
| O              | 1.61535400 | 1.69299700  | 1.08107900  | Pd        | 5.74629000  | 2.63961600  | -1.13462900 |
| K              | 0.42295400 | 3.74413100  | 2.76533400  | C         | 4.52788700  | 4.01913500  | -0.21202300 |
| H              | 3.60505200 | 0.85544900  | 0.49136400  | H         | 4.22984800  | 3.49706800  | 0.69779700  |
| <b>12-TS-e</b> |            |             |             | H         | 5.21716700  | 4.84655300  | -0.04241500 |
|                |            |             |             | H         | 3.69348400  | 4.29965200  | -0.84970000 |

|   |            |             |             |
|---|------------|-------------|-------------|
| H | 6.26236600 | 3.15441600  | -3.52259300 |
| I | 8.40005100 | 3.64047900  | -0.71153100 |
| C | 5.10789600 | 0.93961800  | 1.44325700  |
| O | 6.04103500 | 1.28788000  | 0.55826200  |
| O | 4.70505900 | -0.28132900 | 1.43988600  |
| K | 7.23318300 | 2.83846400  | 2.48848200  |
| I | 7.78639600 | -0.41783400 | 4.02908500  |
| K | 7.10115900 | -1.07052800 | 0.53882000  |
| O | 4.72743900 | 1.79993100  | 2.31369800  |
| K | 4.23705000 | -0.16938200 | 3.98826300  |

**14-TS**

|    |            |             |             |
|----|------------|-------------|-------------|
| C  | 3.68285000 | 2.55506200  | -3.02644500 |
| C  | 3.90532000 | 2.11175100  | -1.70573900 |
| C  | 3.23117800 | 0.98742500  | -1.21865600 |
| C  | 2.33602700 | 0.31630200  | -2.05797400 |
| C  | 2.10300200 | 0.77515900  | -3.36033000 |
| C  | 2.77597900 | 1.89413900  | -3.85514500 |
| H  | 3.40111000 | 0.66816400  | -0.19168400 |
| H  | 1.80282700 | -0.55388700 | -1.68519900 |
| H  | 1.39529200 | 0.25487700  | -3.99942500 |
| H  | 2.62445400 | 2.25175400  | -4.86823800 |
| O  | 4.35666400 | 3.65305300  | -3.44525300 |
| C  | 5.66022800 | 3.71577700  | -2.86152400 |
| H  | 5.95820700 | 4.76273000  | -2.78925900 |
| Pd | 5.72068300 | 2.80066900  | -1.02819100 |
| C  | 3.82485100 | 3.70230200  | -0.38880400 |
| H  | 3.31590500 | 3.14093600  | 0.38881800  |
| H  | 4.51851600 | 4.42713700  | 0.05571200  |
| H  | 3.14887700 | 4.21232000  | -1.06828900 |
| H  | 6.36172400 | 3.13921700  | -3.47154500 |
| I  | 8.51521100 | 2.79896600  | -1.10802500 |
| C  | 5.11162500 | 1.38501400  | 1.85684800  |
| O  | 5.93483900 | 1.86162100  | 0.92819300  |
| O  | 4.42908300 | 0.32347400  | 1.59783800  |
| K  | 7.76155600 | 2.59184700  | 2.62234900  |
| I  | 7.96469900 | -1.04077200 | 3.23620700  |
| K  | 6.49727800 | -0.54598900 | -0.03464200 |
| O  | 5.13024600 | 1.93601600  | 3.01223500  |
| K  | 4.61715900 | -0.36784300 | 4.11281500  |

**14-TS-a**

|   |            |            |             |
|---|------------|------------|-------------|
| C | 3.63747400 | 2.74137700 | -3.24925600 |
| C | 3.69916100 | 2.11502400 | -1.98572300 |
| C | 2.95076500 | 0.94907000 | -1.76915500 |
| C | 2.15587000 | 0.43779300 | -2.79379800 |
| C | 2.09062900 | 1.08613900 | -4.03492900 |
| C | 2.83316000 | 2.24091700 | -4.27337400 |

|    |            |             |             |
|----|------------|-------------|-------------|
| H  | 2.98494500 | 0.46479900  | -0.80032800 |
| H  | 1.57608700 | -0.46399800 | -2.62172600 |
| H  | 1.46191700 | 0.68319400  | -4.82356900 |
| H  | 2.81490200 | 2.74895100  | -5.23173300 |
| O  | 4.36314800 | 3.87675300  | -3.42243100 |
| C  | 5.57954200 | 3.81991100  | -2.70595400 |
| H  | 5.91910600 | 4.83204800  | -2.49332300 |
| Pd | 5.40995800 | 2.68269400  | -0.98805000 |
| C  | 3.42927100 | 3.56052100  | -0.52295000 |
| H  | 2.70756900 | 2.94413900  | 0.00174100  |
| H  | 4.04604800 | 4.10880700  | 0.19734000  |
| H  | 2.98524300 | 4.24206800  | -1.24243100 |
| H  | 6.32294900 | 3.23056000  | -3.25304500 |
| I  | 8.10960700 | 3.43587300  | -0.51159300 |
| K  | 8.29467200 | 1.12788900  | 1.89544300  |
| I  | 5.05602900 | 0.88549300  | 1.34161700  |

**14-TS-b**

|    |            |             |             |
|----|------------|-------------|-------------|
| C  | 3.66329300 | 2.58824500  | -3.03031000 |
| C  | 3.92412900 | 2.07545900  | -1.73967900 |
| C  | 3.21734500 | 0.95842900  | -1.27690400 |
| C  | 2.26872700 | 0.35679500  | -2.11011800 |
| C  | 2.00846900 | 0.87918600  | -3.38304300 |
| C  | 2.70426300 | 1.99427300  | -3.85266400 |
| H  | 3.39717000 | 0.57175300  | -0.27546500 |
| H  | 1.71676800 | -0.50731800 | -1.75162700 |
| H  | 1.25890900 | 0.41383200  | -4.01683800 |
| H  | 2.52603100 | 2.40607600  | -4.84059200 |
| O  | 4.33969300 | 3.68894600  | -3.43067700 |
| C  | 5.65221000 | 3.74472000  | -2.86316500 |
| H  | 5.93652000 | 4.79209800  | -2.75317900 |
| Pd | 5.76935900 | 2.71335800  | -1.09232000 |
| C  | 3.90907900 | 3.61164900  | -0.32400700 |
| H  | 3.64079200 | 3.04753500  | 0.56656700  |
| H  | 4.57728100 | 4.44863100  | -0.08833500 |
| H  | 3.06102000 | 3.99039300  | -0.88449800 |
| H  | 6.35216000 | 3.21262900  | -3.51636000 |
| I  | 8.54160000 | 3.01327000  | -1.07810000 |
| C  | 5.06965400 | 1.08958000  | 1.53493800  |
| O  | 4.69736800 | 1.92396000  | 2.41310000  |
| O  | 4.63277500 | -0.09131100 | 1.36842600  |
| O  | 6.07793400 | 1.49224600  | 0.68733500  |
| K  | 6.31687800 | -0.71850000 | -0.50463500 |
| K  | 6.88770000 | 3.28341300  | 2.32527400  |

**14-TS-c**

|   |            |            |             |
|---|------------|------------|-------------|
| C | 3.92533300 | 2.31092800 | -3.25112900 |
| C | 3.78661400 | 2.02904100 | -1.87143100 |

|                |            |             |             |                |            |             |             |
|----------------|------------|-------------|-------------|----------------|------------|-------------|-------------|
| C              | 2.76987300 | 1.14168600  | -1.47189900 | C              | 4.96047700 | 1.70725700  | 1.91544200  |
| C              | 1.94191400 | 0.54129600  | -2.42092500 | O              | 5.88060600 | 1.38425000  | 0.86249700  |
| C              | 2.10699300 | 0.82746500  | -3.78709000 | O              | 4.09036500 | 0.85224700  | 2.15631600  |
| C              | 3.09792900 | 1.71194600  | -4.20843800 | K              | 7.92872500 | 2.89657900  | 2.59816300  |
| H              | 2.64157200 | 0.93070600  | -0.41580100 | I              | 7.29149300 | 1.64289500  | 5.73472200  |
| H              | 1.15711300 | -0.13649800 | -2.09770200 | O              | 5.20144100 | 2.81107200  | 2.44701200  |
| H              | 1.45629400 | 0.36205500  | -4.52179500 | K              | 4.07818400 | 1.76145400  | 4.72430700  |
| H              | 3.24949300 | 1.94475900  | -5.25721800 | H              | 5.68174600 | 0.47502800  | 0.58875500  |
| O              | 4.87944700 | 3.19222500  | -3.63181600 |                |            |             |             |
| C              | 6.02114200 | 3.12544600  | -2.79024300 |                |            |             |             |
| H              | 6.54001500 | 4.08123300  | -2.82889600 | <b>14-TS-e</b> |            |             |             |
| Pd             | 5.55733900 | 2.46630600  | -0.89035900 | C              | 3.91049600 | 2.43029800  | -3.24390800 |
| C              | 3.76366300 | 3.75988300  | -0.76461900 | C              | 3.85866500 | 2.07945200  | -1.87644300 |
| H              | 2.95205800 | 3.41100300  | -0.13506100 | C              | 3.02159700 | 1.03342500  | -1.46600700 |
| H              | 4.47416600 | 4.34882000  | -0.17619200 | C              | 2.28579000 | 0.31871600  | -2.41865600 |
| H              | 3.43041800 | 4.32392400  | -1.63119800 | C              | 2.36269500 | 0.66323700  | -3.77457800 |
| H              | 6.63220700 | 2.25505700  | -3.06549100 | C              | 3.17161300 | 1.72132100  | -4.19426100 |
| I              | 8.11505400 | 3.34142900  | -0.10724600 | H              | 2.94913800 | 0.78961100  | -0.41143200 |
| K              | 5.21519000 | -0.95903000 | -2.30377200 | H              | 1.63741500 | -0.49078100 | -2.09652100 |
| I              | 5.00772400 | 0.91863300  | 1.45765600  | H              | 1.78436500 | 0.10972800  | -4.50843900 |
| C              | 8.10328900 | -0.58010700 | -1.91036900 | H              | 3.24522600 | 2.00549000  | -5.23875400 |
| O              | 7.42163800 | -1.43342100 | -1.21327900 | O              | 4.67937000 | 3.48343700  | -3.60193200 |
| O              | 9.30307200 | -0.25573000 | -1.54166400 | C              | 5.84897900 | 3.59598300  | -2.78814100 |
| K              | 8.39332400 | -0.33392400 | 0.92649200  | H              | 6.10701100 | 4.65003400  | -2.67881200 |
| K              | 9.48031700 | 1.72593900  | -3.06135900 | Pd             | 5.55405700 | 2.74216000  | -0.91258600 |
| O              | 7.54996600 | 0.01088700  | -2.94663800 | C              | 3.66182800 | 3.82751600  | -0.71354700 |
|                |            |             |             | H              | 2.90839300 | 3.37017500  | -0.08136700 |
|                |            |             |             | H              | 4.29592100 | 4.49955000  | -0.12247300 |
|                |            |             |             | H              | 3.26045100 | 4.34272900  | -1.58175300 |
|                |            |             |             | H              | 6.66213700 | 3.02909600  | -3.24582700 |
| <b>14-TS-d</b> |            |             |             | I              | 8.31434500 | 2.56573100  | -0.72859600 |
| C              | 3.68564400 | 2.56329700  | -2.98829600 | K              | 5.97192100 | -0.56178800 | -1.86856300 |
| C              | 3.94424600 | 2.08760000  | -1.68791500 | I              | 5.05139600 | 1.49044500  | 1.63536900  |
| C              | 3.26799000 | 0.95443400  | -1.21636600 | C              | 8.55080500 | -1.61228300 | -0.51013500 |
| C              | 2.34992300 | 0.31274600  | -2.04723400 | O              | 7.38944200 | -1.63230500 | -0.01427600 |
| C              | 2.09182800 | 0.80592800  | -3.33444700 | O              | 9.64687600 | -1.45393000 | 0.05520200  |
| C              | 2.75567700 | 1.93339500  | -3.81575600 | K              | 8.28796900 | 0.00377200  | 1.89484700  |
| H              | 3.42150300 | 0.61377500  | -0.19603300 | O              | 8.55359400 | -1.72398700 | -1.91400600 |
| H              | 1.82091400 | -0.56403800 | -1.68651500 | H              | 9.47957900 | -1.62328300 | -2.17851800 |
| H              | 1.36819200 | 0.30329900  | -3.96908500 |                |            |             |             |
| H              | 2.58012600 | 2.32029400  | -4.81389200 |                |            |             |             |
| O              | 4.34991600 | 3.67970200  | -3.39281400 |                |            |             |             |
| C              | 5.65240500 | 3.74286200  | -2.85039200 | <b>15</b>      |            |             |             |
| H              | 5.96738100 | 4.78274500  | -2.78234200 | C              | 3.59838400 | 2.48023200  | -1.81646100 |
| Pd             | 5.76154600 | 2.79135000  | -1.04661000 | C              | 2.36303600 | 2.51224400  | -1.12505600 |
| C              | 3.87215600 | 3.70141400  | -0.34404000 | C              | 1.62569200 | 1.32865800  | -1.02883600 |
| H              | 3.17535500 | 3.13444500  | 0.26467200  | C              | 2.08735900 | 0.12351300  | -1.58375000 |
| H              | 4.56148200 | 4.25259000  | 0.30286800  | C              | 3.31123800 | 0.11007000  | -2.25669500 |
| H              | 3.38066100 | 4.35349200  | -1.05976300 | C              | 4.06781500 | 1.28214100  | -2.37679500 |
| H              | 6.34626400 | 3.12493300  | -3.42981900 | H              | 0.66718900 | 1.35206300  | -0.51425400 |
| I              | 8.45015400 | 3.42172400  | -0.87456500 | H              | 1.49091400 | -0.78046600 | -1.50448600 |

|              |             |             |             |              |            |             |             |
|--------------|-------------|-------------|-------------|--------------|------------|-------------|-------------|
| H            | 3.68263800  | -0.81243800 | -2.69411500 | O            | 4.54127900 | -0.47689400 | -2.67377300 |
| H            | 5.01547800  | 1.26757600  | -2.90045200 | K            | 6.08029900 | 1.10453900  | -3.89310200 |
| O            | 4.25202900  | 3.66445900  | -1.86919600 |              |            |             |             |
| C            | 5.56918500  | 3.75039000  | -2.38804000 | <b>17-TS</b> |            |             |             |
| H            | 5.79111700  | 4.81701400  | -2.45546300 | C            | 3.52468900 | 3.42736200  | -3.30342400 |
| Pd           | 6.90843200  | 2.96365100  | -1.09632400 | C            | 3.20737500 | 3.17998100  | -1.95119900 |
| C            | 1.90709300  | 3.80468600  | -0.50071600 | C            | 2.02872300 | 2.47185200  | -1.68614300 |
| H            | 0.95815200  | 3.67696200  | 0.02786200  | C            | 1.24748200 | 1.95210600  | -2.73226300 |
| H            | 2.66336600  | 4.17562900  | 0.19997700  | C            | 1.61990200 | 2.17098300  | -4.06131000 |
| H            | 1.78153700  | 4.58467400  | -1.25892300 | C            | 2.75466900 | 2.93165000  | -4.35716200 |
| H            | 5.65054800  | 3.27665200  | -3.37162200 | H            | 1.72537900 | 2.31162400  | -0.65529100 |
| I            | 8.87333900  | 3.05197800  | -2.97392600 | H            | 0.34335400 | 1.39249700  | -2.50501900 |
| C            | 6.51850100  | 2.00633100  | 1.30807700  | H            | 1.01276000 | 1.77650500  | -4.87122500 |
| O            | 7.72706500  | 1.87886800  | 0.81974400  | H            | 3.02894800 | 3.16042300  | -5.38332600 |
| O            | 5.61513600  | 2.52224000  | 0.50612600  | O            | 4.65262100 | 4.15570100  | -3.57305200 |
| K            | 8.35244100  | 0.31840300  | 2.92732200  | C            | 5.07441500 | 4.89848900  | -2.40211500 |
| I            | 6.61583000  | -2.12886800 | 0.97505100  | H            | 4.56823000 | 5.87197900  | -2.39812200 |
| K            | 7.96153800  | 0.01165300  | -1.38463000 | Pd           | 4.59870700 | 3.90135500  | -0.66987400 |
| O            | 6.18841300  | 1.59535300  | 2.46206600  | C            | 4.35166500 | 5.91661200  | 0.81995900  |
| K            | 4.03192300  | 0.50355000  | 1.25016600  | H            | 3.44294000 | 5.66459000  | 0.28339300  |
|              |             |             |             | H            | 4.35620100 | 5.62517600  | 1.86162700  |
|              |             |             |             | H            | 4.78501300 | 6.87446400  | 0.56518800  |
| <b>16-TS</b> |             |             |             | H            | 6.15613900 | 5.03858300  | -2.46966600 |
| C            | 3.40483400  | 3.19415500  | -3.54804000 | Cl           | 6.45730400 | 5.01796700  | 0.54600300  |
| C            | 2.92059700  | 3.17397100  | -2.22365900 | K            | 3.79312000 | -0.29310500 | -1.15535400 |
| C            | 1.56772500  | 2.86381500  | -2.03883800 | I            | 3.84281600 | 2.34704700  | 1.64359000  |
| C            | 0.75555800  | 2.49606800  | -3.12536400 | C            | 6.49767400 | 0.42088000  | -1.78347700 |
| C            | 1.28510500  | 2.46907000  | -4.41880900 | O            | 6.31661800 | -0.19960500 | -0.66043700 |
| C            | 2.61407000  | 2.84013300  | -4.64223400 | O            | 7.40453900 | 1.35748100  | -1.87604100 |
| H            | 1.14984800  | 2.89254900  | -1.03655300 | K            | 7.39127200 | 1.68113400  | 0.69548900  |
| H            | -0.28940200 | 2.24556200  | -2.95895300 | O            | 5.72009200 | 0.16601100  | -2.79943000 |
| H            | 0.65775800  | 2.18964800  | -5.26059600 | K            | 6.52393300 | 2.15081000  | -4.12833500 |
| H            | 3.02824700  | 2.87883200  | -5.64580200 |              |            |             |             |
| O            | 4.71363700  | 3.54896500  | -3.74258400 | <b>18-TS</b> |            |             |             |
| C            | 5.22202300  | 4.26250400  | -2.58923100 | Pd           | 2.99172300 | 0.60482600  | 1.77232700  |
| H            | 4.98726100  | 5.32886300  | -2.69632900 | C            | 2.88036800 | 2.32732200  | -0.80195000 |
| Pd           | 4.36113800  | 3.58023500  | -0.84731400 | C            | 2.21743500 | 1.36884300  | -0.01829600 |
| C            | 4.57012700  | 5.69053400  | 0.49516400  | C            | 0.81352400 | 1.42968100  | 0.05202100  |
| H            | 3.64714200  | 5.61350000  | -0.07088000 | C            | 0.18818700 | 2.57676600  | -0.47480200 |
| H            | 4.45172900  | 5.53739200  | 1.55921400  | C            | 0.91530200 | 3.57877800  | -1.13487500 |
| H            | 5.23306200  | 6.48542600  | 0.17980100  | C            | 2.30158400 | 3.45258600  | -1.35216500 |
| H            | 6.30504500  | 4.11964000  | -2.56358600 | H            | 0.22927300 | 0.65664700  | 0.53880000  |
| Br           | 6.48453900  | 4.19873700  | 0.50407100  | H            | 0.88866400 | 2.68333300  | -0.37399800 |
| K            | 2.38335300  | -0.22753200 | -1.29278000 | H            | 0.39201100 | 4.44052800  | -1.53897000 |
| I            | 2.98536500  | 2.47407800  | 1.44479100  | H            | 2.85991900 | 4.17048300  | -1.94315200 |
| C            | 5.23172100  | -0.43185100 | -1.56804300 | O            | 4.12783800 | 1.75763500  | -0.97573400 |
| O            | 4.72533200  | -0.90104500 | -0.47095500 | C            | 3.71567800 | 0.48263500  | -0.36490000 |
| O            | 6.39725900  | 0.15859400  | -1.55139200 | H            | 3.45967000 | -0.24205100 | -1.13753200 |
| K            | 6.16398800  | 0.62136900  | 0.98710300  |              |            |             |             |

|              |             |             |             |              |             |             |             |
|--------------|-------------|-------------|-------------|--------------|-------------|-------------|-------------|
| H            | 4.53533900  | 0.09376900  | 0.26447300  | O            | 6.40226000  | -2.28486200 | 2.67779800  |
| K            | 6.10584100  | 3.33538900  | 0.22728800  | K            | 6.98015200  | 0.02107600  | 1.73006600  |
| I            | 2.58498100  | 0.50551200  | 4.45965000  |              |             |             |             |
| C            | 4.82485900  | 4.30082200  | 2.65090600  | <b>21</b>    |             |             |             |
| O            | 6.00432700  | 3.73852700  | 2.72840500  | Pd           | 3.97614700  | -0.12229700 | 1.92314500  |
| O            | 4.12180400  | 4.48417700  | 3.72404500  | C            | 2.48405300  | 1.06428700  | 1.19847400  |
| K            | 5.36276500  | 2.64098300  | 4.96511400  | H            | 1.60096000  | 0.43139900  | 1.07873800  |
| O            | 4.32515700  | 4.60065700  | 1.48574600  | H            | 2.29598000  | 1.88220200  | 1.89327300  |
| K            | 1.96559800  | 3.99863600  | 2.38742200  | H            | 2.81125900  | 1.43465400  | 0.22367000  |
|              |             |             |             | I            | 3.79972700  | -1.65642000 | -0.32803200 |
| <b>19</b>    |             |             |             | K            | 3.72147700  | -2.92533300 | 3.47603300  |
| Pd           | 1.96397800  | 1.11750400  | 1.83426300  | I            | 4.15128800  | 1.40404800  | 4.20958500  |
| C            | 2.97546900  | 2.35539000  | -0.81192600 | C            | 6.34085200  | -1.49339200 | 3.68087900  |
| C            | 2.39451900  | 1.17117700  | -0.30348300 | O            | 5.88717200  | -2.10716600 | 4.71962100  |
| C            | 0.98518200  | 1.09589500  | -0.12258300 | O            | 7.41121200  | -0.77662800 | 3.72155100  |
| C            | 0.28820000  | 2.33540100  | -0.35099800 | K            | 6.74189100  | -0.13247400 | 6.11216200  |
| C            | 0.92725200  | 3.48529000  | -0.80009100 | O            | 5.67123200  | -1.57920700 | 2.54259300  |
| C            | 2.32561900  | 3.52643900  | -1.09216900 | K            | 7.10750200  | 0.06321800  | 1.24479100  |
| H            | 0.42770600  | 0.16356200  | -0.08687900 |              |             |             |             |
| H            | -0.78772000 | 2.35135200  | -0.20490400 | <b>22-TS</b> |             |             |             |
| H            | 0.33370200  | 4.37750600  | -0.98448600 | Pd           | 0.53355100  | -0.36496300 | -0.70891400 |
| H            | 2.80012500  | 4.39674800  | -1.53041600 | C            | 0.55848800  | -2.13775600 | 0.53426200  |
| O            | 4.22500600  | 1.80274300  | -1.12499200 | C            | 0.53594100  | -1.65974000 | 1.85298800  |
| C            | 3.67188100  | 0.46371700  | -0.74954200 | C            | 1.05277700  | -3.42376000 | 0.29178900  |
| H            | 3.59774700  | -0.16127600 | -1.64453600 | C            | 1.13393500  | -2.45332300 | 2.84568700  |
| H            | 4.28447900  | -0.01252500 | 0.01871800  | H            | 0.16103200  | -0.66929100 | 2.09154300  |
| K            | 6.14487500  | 3.26188600  | 0.23594600  | C            | 1.62619800  | -4.24274800 | 1.25207100  |
| I            | 2.06770200  | 0.98102100  | 4.55133800  | C            | 1.67886500  | -3.71120600 | 2.54727400  |
| C            | 4.94046700  | 4.31608500  | 2.66369700  | H            | 1.20723900  | -2.06758400 | 3.85873800  |
| O            | 6.01305500  | 3.56781600  | 2.74630100  | H            | 1.97663900  | -5.24229400 | 1.01945900  |
| O            | 4.26694700  | 4.60166900  | 3.73254100  | H            | 2.13142400  | -4.29640700 | 3.34231800  |
| K            | 5.18213400  | 2.58694500  | 4.97832000  | C            | -0.19504200 | -2.54853900 | -1.09149200 |
| O            | 4.50862500  | 4.70373100  | 1.49800900  | H            | -1.22671500 | -2.75463400 | -0.80412800 |
| K            | 2.06757000  | 4.39840700  | 2.38769400  | H            | -0.13768000 | -2.10492500 | -2.09055700 |
|              |             |             |             | I            | 1.05045900  | 2.28388900  | -1.11290600 |
| <b>20-TS</b> |             |             |             | C            | 2.42966300  | -0.78419100 | -1.35933700 |
| Pd           | 3.69481500  | 0.35165900  | 2.13244400  | H            | 2.48509500  | -1.86351500 | -1.52094700 |
| C            | 1.94197300  | 0.94237000  | 0.17286300  | H            | 2.60514600  | -0.23415300 | -2.28420800 |
| H            | 1.02201900  | 0.48449300  | 0.51911100  | H            | 3.12600900  | -0.46220700 | -0.58294000 |
| H            | 2.33368800  | 1.70138400  | 0.84979600  | O            | 0.68076700  | -3.68140200 | -0.99591300 |
| H            | 1.90805200  | 1.27989500  | -0.85685100 | C            | -2.58385700 | -0.49272000 | -0.71693900 |
| I            | 3.36883500  | -0.94585400 | -0.20791400 | O            | -1.57588200 | -0.08718900 | 0.05284600  |
| K            | 4.04482100  | -2.62207800 | 3.61229000  | O            | -3.11529700 | -1.64742600 | -0.46566600 |
| I            | 4.27156800  | 1.38993900  | 4.55096300  | K            | -2.35688100 | 2.45621600  | -0.28303200 |
| C            | 6.83287400  | -1.92765900 | 3.85025700  | I            | -5.19622700 | 1.06069100  | 1.79768700  |
| O            | 6.25659900  | -2.39304000 | 4.92410600  | K            | -2.66766200 | -1.43909300 | 2.09968100  |
| O            | 7.77174100  | -1.02742500 | 3.95154100  | O            | -3.05217400 | 0.28814900  | -1.61366600 |
| K            | 6.97135500  | -0.36300700 | 6.27001200  | K            | -5.42165400 | -0.70423600 | -1.30383500 |

|              |             |             |             |                |             |             |             |
|--------------|-------------|-------------|-------------|----------------|-------------|-------------|-------------|
| <b>23</b>    |             |             |             | H              | 7.26337100  | 0.25923500  | -0.41560300 |
| Pd           | 8.94305600  | 1.50553900  | -2.09859700 | H              | 8.36798200  | -0.85241600 | -1.30557100 |
| C            | 6.25898700  | 0.99566400  | -3.00289900 | C              | 4.06881500  | 0.07301700  | -3.07202300 |
| C            | 4.88893700  | 1.30797700  | -2.95526200 | H              | 3.03488900  | 0.36906300  | -3.27084100 |
| C            | 4.51750800  | 2.60723700  | -3.31003600 | H              | 4.33865500  | -0.72049000 | -3.77843000 |
| C            | 5.45324700  | 3.58393500  | -3.68966900 | H              | 4.11895600  | -0.37121200 | -2.07223500 |
| C            | 6.79905100  | 3.25441000  | -3.76065700 | C              | 10.49536900 | 2.86617200  | -3.72397300 |
| C            | 7.20723400  | 1.94409500  | -3.44869500 | O              | 9.59026200  | 2.28868000  | -4.47953200 |
| H            | 3.46346700  | 2.87265900  | -3.26405000 | O              | 10.12857500 | 3.37587800  | -2.56879500 |
| H            | 5.11567800  | 4.58610500  | -3.93564900 | H              | 8.37799000  | 2.06803600  | -3.62169400 |
| H            | 7.55969500  | 3.96304300  | -4.06905000 | C              | 11.21564500 | -0.07750400 | -0.77795000 |
| O            | 6.67708800  | -0.23033200 | -2.58349800 | O              | 10.49084000 | 0.98114200  | -0.44160200 |
| C            | 7.82008100  | -0.12962300 | -1.70541300 | O              | 11.33182000 | -1.02333000 | 0.08048000  |
| H            | 7.44703900  | 0.02048200  | -0.67867900 | K              | 12.44105800 | 2.92002000  | -1.46833100 |
| H            | 8.37677000  | -1.06737400 | -1.77937000 | I              | 14.21456800 | 1.45421800  | 1.47617300  |
| C            | 3.89293400  | 0.27275900  | -2.49917700 | K              | 10.77766000 | 0.59174000  | 2.08555000  |
| H            | 2.89169500  | 0.70199500  | -2.40429100 | O              | 11.72827100 | 2.82635400  | -4.05549900 |
| H            | 3.83979600  | -0.56492900 | -3.20388000 | K              | 11.15376300 | 0.21727600  | -4.40569900 |
| H            | 4.18568200  | -0.15159300 | -1.53328500 | O              | 11.86496300 | -0.08709600 | -1.89532000 |
| C            | 10.75856600 | 2.93813100  | -3.69072200 | K              | 13.80935400 | -1.35854700 | -0.56333900 |
| O            | 10.17677800 | 2.27745200  | -4.62498600 |                |             |             |             |
| O            | 10.06831500 | 3.27734800  | -2.60183300 | <b>24-TS-a</b> |             |             |             |
| H            | 8.17734600  | 1.61622700  | -3.90050300 | C              | -2.79926500 | -0.25021800 | 0.27978500  |
| C            | 11.28326900 | -0.07906600 | -0.95921900 | C              | -4.02982700 | 0.41064800  | 0.09022900  |
| O            | 10.36848100 | 0.84357900  | -0.67151700 | C              | -3.98763700 | 1.75523400  | -0.28100200 |
| O            | 11.35463900 | -1.10019700 | -0.18565400 | C              | -2.76970200 | 2.43443700  | -0.45980400 |
| K            | 12.14633800 | 3.12875800  | -1.07214900 | C              | -1.57247900 | 1.76605600  | -0.22393000 |
| I            | 13.50265200 | 1.50947500  | 2.05433300  | C              | -1.54917000 | 0.41022400  | 0.18612200  |
| K            | 10.18871600 | 0.16008800  | 1.80596500  | H              | -4.92494900 | 2.28205300  | -0.44636800 |
| O            | 12.02198100 | 3.19368000  | -3.71132100 | H              | -2.77428900 | 3.48510500  | -0.74067800 |
| K            | 12.14320500 | 0.67328500  | -4.49332200 | H              | -0.62482900 | 2.29433300  | -0.30634700 |
| O            | 12.13251900 | 0.12266900  | -1.90643000 | H              | -0.65179800 | 0.18120800  | 1.01850700  |
| K            | 13.93665600 | -1.03815000 | -0.29181200 | O              | -2.81665700 | -1.57893300 | 0.55435400  |
|              |             |             |             | C              | -1.82927200 | -2.30645100 | -0.18929400 |
| <b>24-TS</b> |             |             |             | H              | -2.27821700 | -2.64481300 | -1.13097000 |
| Pd           | 8.93394900  | 1.68532400  | -1.72912900 | Pd             | -0.28079100 | -1.15520400 | -0.73714600 |
| C            | 6.36897100  | 1.10201800  | -2.87791300 | C              | -5.32321100 | -0.34517000 | 0.25420900  |
| C            | 5.00502800  | 1.24897100  | -3.18641500 | H              | -6.18496600 | 0.28400800  | 0.01350600  |
| C            | 4.57059100  | 2.52507500  | -3.54964800 | H              | -5.34410600 | -1.23136700 | -0.38878000 |
| C            | 5.43917800  | 3.62837900  | -3.59367900 | H              | -5.43680900 | -0.70695400 | 1.28206200  |
| C            | 6.78573700  | 3.45416200  | -3.30888800 | H              | -1.46508900 | -3.12452000 | 0.43160600  |
| C            | 7.29259000  | 2.17240700  | -2.99324900 | K              | 2.43158200  | 1.59228900  | 0.86631300  |
| H            | 3.51713700  | 2.66682900  | -3.78191000 | C              | 1.17350600  | -0.73104700 | 1.94010500  |
| H            | 5.05378500  | 4.60601400  | -3.86854500 | O              | 0.68491100  | -1.84846900 | 1.52112200  |
| H            | 7.49544200  | 4.27219400  | -3.38311700 | O              | 0.40329400  | 0.33400200  | 2.00372000  |
| O            | 6.80562300  | -0.09645400 | -2.40729100 | O              | 2.43684300  | -0.60372500 | 2.18631000  |
| C            | 7.78957100  | 0.07367300  | -1.36430900 | C              | 2.27171700  | 0.23827500  | -2.05891000 |
|              |             |             |             | O              | 2.13206900  | 0.54782000  | -3.30528200 |



|                |             |             |             |                |             |             |             |
|----------------|-------------|-------------|-------------|----------------|-------------|-------------|-------------|
| O              | 1.27455000  | 0.47942700  | -1.22983100 | H              | 6.97589900  | 0.16989800  | -0.60339500 |
| K              | 3.58570500  | -1.41626100 | -3.97598400 | H              | 8.30782500  | -0.81347800 | -1.30600700 |
| I              | 0.61786500  | -3.06290900 | -2.71473900 | C              | 4.29375800  | -0.10733900 | -3.60925600 |
| K              | -0.48570600 | 0.79450300  | -3.17989100 | H              | 3.24962600  | 0.09413200  | -3.86443500 |
| O              | 3.35134400  | -0.31059700 | -1.61131300 | H              | 4.71370800  | -0.75768000 | -4.38559500 |
| K              | 2.87467600  | -2.34988000 | 0.28507300  | H              | 4.32172300  | -0.67904300 | -2.67595800 |
|                |             |             |             | C              | 10.44154800 | 3.35452000  | -3.24019500 |
| <b>24-TS-b</b> |             |             |             | O              | 9.65576500  | 2.71088600  | -4.07992300 |
| Pd             | 8.92405000  | 1.53493200  | -1.83009500 | O              | 9.99218100  | 3.55711200  | -2.01351100 |
| C              | 6.33316500  | 1.12038000  | -3.02024700 | H              | 8.37515300  | 2.41114000  | -3.37147000 |
| C              | 4.97321800  | 1.31436700  | -3.32040700 | K              | 13.46559900 | 2.20665100  | -2.80151600 |
| C              | 4.55832400  | 2.62801900  | -3.54527300 | O              | 11.59996100 | 3.72575500  | -3.57017100 |
| C              | 5.44177300  | 3.71786400  | -3.46184200 | K              | 9.89258900  | 0.09065700  | -3.95573700 |
| C              | 6.78320800  | 3.49659200  | -3.18637200 | C              | 11.51499000 | 1.03331500  | -0.96213700 |
| C              | 7.27402300  | 2.18020100  | -3.01907200 | O              | 11.60277300 | 0.43176000  | -2.09526400 |
| H              | 3.50829100  | 2.80929900  | -3.76490400 | O              | 10.35612100 | 1.09036500  | -0.30600000 |
| H              | 5.06993400  | 4.72476100  | -3.62941500 | O              | 12.51666500 | 1.64769500  | -0.43951400 |
| H              | 7.50313100  | 4.30889100  | -3.15945000 | K              | 10.94909300 | 3.58714000  | 0.36108300  |
| O              | 6.75877000  | -0.12368200 | -2.67736800 |                |             |             |             |
| C              | 7.73375800  | -0.07611800 | -1.62096000 | <b>24-TS-d</b> |             |             |             |
| H              | 7.22155600  | 0.08549300  | -0.66255000 | Pd             | 8.96135400  | 1.51134900  | -1.67927300 |
| H              | 8.26699500  | -1.02770400 | -1.62644800 | C              | 6.31018800  | 1.16478600  | -2.73608000 |
| C              | 4.02092900  | 0.14608600  | -3.33478000 | C              | 4.95208000  | 1.40873600  | -3.01721700 |
| H              | 2.99502300  | 0.47399400  | -3.52485000 | C              | 4.60306000  | 2.69648500  | -3.42738600 |
| H              | 4.29618300  | -0.58170400 | -4.10661800 | C              | 5.55729600  | 3.71771000  | -3.55064100 |
| H              | 4.04438300  | -0.38932800 | -2.37961100 | C              | 6.89522400  | 3.44025500  | -3.29425800 |
| C              | 10.39670100 | 2.92832000  | -3.76272800 | C              | 7.31805300  | 2.14164700  | -2.92272900 |
| O              | 9.49757100  | 2.36982400  | -4.54400400 | H              | 3.55761700  | 2.91182500  | -3.63619600 |
| O              | 10.02109700 | 3.40271500  | -2.60427800 | H              | 5.24959700  | 4.70990100  | -3.86941900 |
| H              | 8.36075300  | 2.13564800  | -3.73447500 | H              | 7.65477600  | 4.20017600  | -3.46625900 |
| I              | 11.20879600 | 0.31447900  | -0.73170400 | O              | 6.64995600  | -0.04852000 | -2.22925400 |
| K              | 12.37247200 | 3.59200500  | -1.65366300 | C              | 7.66599700  | 0.04812400  | -1.21635900 |
| O              | 11.63171200 | 2.90002800  | -4.09782500 | H              | 7.20235700  | 0.33783500  | -0.26480900 |
| K              | 11.07186600 | 0.30429400  | -4.57251400 | H              | 8.15165900  | -0.92511500 | -1.13987100 |
|                |             |             |             | C              | 3.93283700  | 0.31544500  | -2.82383000 |
| <b>24-TS-c</b> |             |             |             | H              | 2.92111800  | 0.67499900  | -3.03108600 |
| Pd             | 8.78006300  | 1.77616600  | -1.52242600 | H              | 4.13693400  | -0.53681900 | -3.48163300 |
| C              | 6.41445300  | 1.14745300  | -3.04506300 | H              | 3.96448400  | -0.07039800 | -1.79957100 |
| C              | 5.08056900  | 1.17255100  | -3.48034200 | C              | 10.45831500 | 2.85962400  | -3.76525600 |
| C              | 4.52080300  | 2.42731700  | -3.74014000 | O              | 9.48899700  | 2.28189700  | -4.45480200 |
| C              | 5.24319000  | 3.61593500  | -3.56073400 | O              | 10.25245900 | 3.15508900  | -2.51997100 |
| C              | 6.56874500  | 3.56050900  | -3.14723600 | H              | 8.46359700  | 2.00523600  | -3.62895800 |
| C              | 7.19902000  | 2.31947700  | -2.91610300 | K              | 12.85635300 | 3.42088300  | -1.91569800 |
| H              | 3.48472900  | 2.47558900  | -4.06818400 | I              | 12.05381100 | 6.36713500  | -0.32480300 |
| H              | 4.76652900  | 4.57119400  | -3.76137200 | K              | 9.23583200  | 4.48571100  | -0.44753900 |
| H              | 7.16593400  | 4.46244900  | -3.05044600 | O              | 11.57876500 | 3.08541500  | -4.32835100 |
| O              | 6.96279000  | -0.05715900 | -2.67860100 | K              | 10.90084500 | 1.97724300  | -6.52974100 |
| C              | 7.69880600  | 0.08647200  | -1.42514300 | I              | 10.85747700 | 0.80770900  | 0.16088100  |

**24-TS-e**

|    |             |             |             |
|----|-------------|-------------|-------------|
| Pd | 8.86678500  | 1.83969700  | -1.45506400 |
| C  | 6.43127500  | 1.16350000  | -2.84446600 |
| C  | 5.10109200  | 1.16978900  | -3.28205300 |
| C  | 4.55201400  | 2.41880900  | -3.59314100 |
| C  | 5.28370500  | 3.60683200  | -3.45896700 |
| C  | 6.60779200  | 3.56145400  | -3.03463600 |
| C  | 7.23259900  | 2.32719600  | -2.75156900 |
| H  | 3.51819800  | 2.46269500  | -3.92817300 |
| H  | 4.81540500  | 4.55647200  | -3.70092300 |
| H  | 7.20050800  | 4.46996200  | -2.97212400 |
| O  | 6.99533400  | -0.02722300 | -2.43920500 |
| C  | 7.77228700  | 0.18469400  | -1.24303600 |
| H  | 7.10325900  | 0.34916600  | -0.39066100 |
| H  | 8.40880300  | -0.68868500 | -1.08862600 |
| C  | 4.30751700  | -0.10957000 | -3.36438200 |
| H  | 3.26302800  | 0.08871300  | -3.61951800 |
| H  | 4.71842400  | -0.78664600 | -4.12269900 |
| H  | 4.33728900  | -0.65057600 | -2.41299400 |
| C  | 10.43780000 | 2.91525600  | -3.82364300 |
| O  | 9.37508000  | 2.38328500  | -4.34030100 |
| O  | 10.16065200 | 3.62326900  | -2.67700600 |
| H  | 8.38870600  | 2.33930800  | -3.45966100 |
| C  | 11.49232300 | 0.68873300  | -0.92048400 |
| O  | 10.42175700 | 1.12423500  | -0.24914000 |
| O  | 12.62072600 | 0.75619100  | -0.32626200 |
| I  | 12.89964300 | 4.92818600  | -0.81244800 |
| K  | 11.85901200 | 2.52764600  | 1.42935200  |
| O  | 11.58868800 | 2.78867000  | -4.24030400 |
| K  | 9.78370100  | -0.22529300 | -3.99518300 |
| O  | 11.37543900 | 0.29456500  | -2.13736100 |
| K  | 13.54181800 | 1.91359200  | -2.59783900 |
| H  | 10.98037600 | 4.02906600  | -2.30428600 |

**24-TS-f**

|   |             |             |             |
|---|-------------|-------------|-------------|
| C | -2.76713000 | -0.22790300 | 0.34811400  |
| C | -3.98670800 | 0.48755000  | 0.33108000  |
| C | -3.93193800 | 1.82673500  | -0.04430600 |
| C | -2.72236600 | 2.46854500  | -0.38238600 |
| C | -1.53211300 | 1.75872700  | -0.31474500 |
| C | -1.52123100 | 0.39610400  | 0.07998400  |
| H | -4.86037700 | 2.39307500  | -0.07769600 |
| H | -2.72845200 | 3.52109600  | -0.65295700 |
| H | -0.57564800 | 2.23744400  | -0.51238800 |
| H | -0.62130700 | 0.23705100  | 1.01377000  |
| O | -2.79509300 | -1.53346800 | 0.62849900  |
| C | -1.65639600 | -2.28250300 | 0.13175200  |

|    |             |             |             |
|----|-------------|-------------|-------------|
| H  | -2.00871300 | -2.89226800 | -0.70677200 |
| Pd | -0.20176100 | -1.09544400 | -0.62885800 |
| C  | -5.27160700 | -0.21420100 | 0.68323500  |
| H  | -6.13058900 | 0.45640200  | 0.59060600  |
| H  | -5.43345000 | -1.08438200 | 0.03752000  |
| H  | -5.23657700 | -0.59442700 | 1.71010500  |
| H  | -1.28400200 | -2.89803700 | 0.95136800  |
| K  | 2.71308100  | 0.02187600  | 0.72253600  |
| C  | 0.30822000  | -0.71242300 | 2.75111400  |
| O  | -0.62873200 | -1.41951800 | 3.08583200  |
| O  | 0.33400600  | 0.33018300  | 1.99115300  |
| O  | 1.60754800  | -1.03957200 | 3.17416300  |
| C  | 2.14236300  | 0.24310000  | -2.28174700 |
| O  | 1.83583500  | 0.12290000  | -3.53078300 |
| O  | 1.17871000  | 0.51720700  | -1.40927300 |
| K  | 3.58320500  | -1.76476100 | -3.63939900 |
| I  | 1.25330400  | -3.30351300 | -1.45230600 |
| K  | -0.69566700 | 0.51539700  | -3.26155600 |
| O  | 3.34087900  | 0.07193700  | -1.85819000 |
| H  | 1.49893300  | -1.83187000 | 3.72060200  |

**24-TS-g**

|    |             |             |             |
|----|-------------|-------------|-------------|
| C  | -2.66403800 | -0.20550900 | 0.24497500  |
| C  | -3.93685800 | 0.35781100  | 0.40844600  |
| C  | -4.09613800 | 1.66464200  | -0.05394300 |
| C  | -3.04494900 | 2.38248700  | -0.64972100 |
| C  | -1.78863300 | 1.80384000  | -0.76634100 |
| C  | -1.55052000 | 0.49636100  | -0.27881400 |
| H  | -5.07240600 | 2.13406900  | 0.04192400  |
| H  | -3.21913100 | 3.39631400  | -0.99799700 |
| H  | -0.96257000 | 2.37222600  | -1.18626800 |
| H  | -0.59682800 | 0.48375600  | 0.69261200  |
| O  | -2.44354800 | -1.49300900 | 0.63626700  |
| C  | -1.54410800 | -2.15327300 | -0.22795700 |
| H  | -2.03742800 | -2.45019000 | -1.16153900 |
| Pd | -0.13047200 | -0.92484900 | -0.98814000 |
| C  | -5.05342600 | -0.43474400 | 1.03523700  |
| H  | -5.99342700 | 0.12314500  | 1.01970900  |
| H  | -5.20411000 | -1.38599500 | 0.51441700  |
| H  | -4.81719000 | -0.68050500 | 2.07690500  |
| H  | -1.10583700 | -2.99966700 | 0.30051900  |
| K  | 2.10879700  | -1.46760600 | 1.76582600  |
| C  | -0.32882500 | -0.02499500 | 2.79969300  |
| O  | -1.58881100 | 0.40142900  | 3.06171800  |
| O  | 0.18870200  | 0.47330900  | 1.72297300  |
| O  | 0.23693500  | -0.83317600 | 3.55170700  |
| I  | 1.84055600  | -2.72048700 | -1.57160400 |
| H  | -1.87582000 | -0.08448100 | 3.84914900  |

**24-TS-h**

|    |             |             |             |
|----|-------------|-------------|-------------|
| C  | -2.77367600 | -0.36467200 | 0.24160800  |
| C  | -3.95738000 | 0.37125100  | 0.44408200  |
| C  | -3.93448900 | 1.70617400  | 0.04940000  |
| C  | -2.80211400 | 2.30408900  | -0.54086200 |
| C  | -1.63762000 | 1.57504200  | -0.70767000 |
| C  | -1.57246400 | 0.23570700  | -0.23730700 |
| H  | -4.83915400 | 2.29733600  | 0.17746900  |
| H  | -2.85360500 | 3.34183900  | -0.85952000 |
| H  | -0.74855100 | 1.99466000  | -1.17077600 |
| H  | -0.67023800 | 0.17986700  | 0.71685400  |
| O  | -2.74149400 | -1.67219100 | 0.51985600  |
| C  | -1.76502500 | -2.34910500 | -0.30862900 |
| H  | -2.28372400 | -2.69637900 | -1.21570900 |
| Pd | -0.27405600 | -1.16247500 | -0.99666800 |
| C  | -5.17964300 | -0.30043800 | 1.01360200  |
| H  | -6.02741900 | 0.38939200  | 1.05539500  |
| H  | -5.46673900 | -1.16875200 | 0.41050400  |
| H  | -4.98909000 | -0.67346100 | 2.02627200  |
| H  | -1.38764000 | -3.19433300 | 0.27490400  |
| C  | 1.79941600  | 0.92267600  | -2.11181600 |
| O  | 0.89256100  | 1.65927500  | -2.62322700 |
| O  | 3.03046700  | 1.34360400  | -1.97290500 |
| O  | 1.53704100  | -0.28893300 | -1.67873000 |
| C  | 1.27625700  | -0.01920100 | 1.74438200  |
| O  | 1.60341000  | -1.17603200 | 1.46587900  |
| O  | 0.13183900  | 0.54116600  | 1.76255000  |
| O  | 2.33614700  | 0.85451600  | 2.04312800  |
| K  | 3.62589300  | -0.44716600 | -0.15092200 |
| K  | 2.46751400  | 3.51032400  | -3.12579200 |
| H  | 1.92330000  | 1.72001900  | 2.17880700  |

**25**

|    |            |             |             |
|----|------------|-------------|-------------|
| Pd | 8.91392200 | 1.95462400  | -1.42744000 |
| C  | 6.42261100 | 1.14513600  | -2.55306400 |
| C  | 5.22817900 | 1.11537300  | -3.28316100 |
| C  | 4.80049000 | 2.32367200  | -3.85495800 |
| C  | 5.51745900 | 3.50796500  | -3.67767800 |
| C  | 6.70486000 | 3.50634600  | -2.92892500 |
| C  | 7.19535200 | 2.31296100  | -2.38243400 |
| H  | 3.87835400 | 2.33117300  | -4.43165500 |
| H  | 5.15370300 | 4.43196900  | -4.11953500 |
| H  | 7.25346600 | 4.43389900  | -2.77522900 |
| O  | 6.90202900 | -0.00567800 | -1.97679400 |
| C  | 7.81389300 | 0.33645200  | -0.89791900 |
| H  | 7.22784600 | 0.57346100  | 0.00096400  |
| H  | 8.44123700 | -0.54008000 | -0.70835000 |

|   |             |             |             |
|---|-------------|-------------|-------------|
| C | 4.44871000  | -0.16762100 | -3.42457700 |
| H | 3.51172400  | -0.00561400 | -3.96544700 |
| H | 5.02445600  | -0.93058000 | -3.96338400 |
| H | 4.21471600  | -0.59461900 | -2.44313500 |
| C | 10.42407900 | 3.04628000  | -3.76295400 |
| O | 9.35124300  | 2.92617600  | -4.62696500 |
| O | 10.20848200 | 3.56257000  | -2.61766900 |
| H | 8.55373000  | 3.24481700  | -4.16556500 |
| C | 11.07621700 | -0.01869400 | -0.75042000 |
| O | 10.74011700 | 1.22247600  | -0.43576600 |
| O | 11.04321800 | -0.92249400 | 0.15906200  |
| K | 12.69005200 | 2.52567800  | -1.80689300 |
| I | 14.60240800 | 0.82263600  | 0.91278500  |
| K | 11.17963300 | 0.84136500  | 2.08418800  |
| O | 11.49274300 | 2.55524400  | -4.18894200 |
| K | 9.77365100  | 0.15149200  | -3.89803100 |
| O | 11.50404900 | -0.27489200 | -1.94575200 |
| K | 13.23297900 | -1.92826300 | -0.81548400 |

**26-TS**

|    |            |             |             |
|----|------------|-------------|-------------|
| C  | 3.72774900 | 2.45317200  | -3.42936200 |
| C  | 3.25619200 | 2.52159300  | -2.10450900 |
| C  | 1.98534100 | 1.99622200  | -1.83619900 |
| C  | 1.26607100 | 1.33893200  | -2.84631300 |
| C  | 1.80942900 | 1.21445800  | -4.13098800 |
| C  | 3.04794500 | 1.78249600  | -4.45594600 |
| H  | 1.57211100 | 2.07629800  | -0.83570500 |
| H  | 0.28342700 | 0.92571000  | -2.63128500 |
| H  | 1.25178700 | 0.69517900  | -4.90685600 |
| O  | 4.92182400 | 3.06789200  | -3.70511400 |
| C  | 5.19554600 | 4.05583600  | -2.68361900 |
| H  | 4.60870300 | 4.95936600  | -2.88918900 |
| Pd | 4.62308100 | 3.34102700  | -0.82503200 |
| C  | 4.81402700 | 5.45954200  | 0.48932500  |
| H  | 3.88965700 | 5.31467500  | -0.06596200 |
| H  | 4.72581400 | 5.26320800  | 1.55036300  |
| H  | 5.37066600 | 6.34183600  | 0.19938800  |
| H  | 6.26136600 | 4.29439800  | -2.73976500 |
| I  | 7.05593300 | 4.11635800  | 0.33504400  |
| K  | 3.46205900 | -0.79836200 | -1.27927100 |
| I  | 3.56756600 | 2.12696600  | 1.56783900  |
| C  | 6.33683100 | -0.62887300 | -1.11009500 |
| O  | 5.72150100 | -1.23477600 | -0.14030400 |
| O  | 7.43434300 | 0.03530800  | -0.87339900 |
| K  | 6.72876700 | 0.35236500  | 1.58589300  |
| O  | 5.81020600 | -0.61057900 | -2.30326700 |
| K  | 7.18378700 | 1.38608100  | -3.02422900 |
| C  | 3.64159700 | 1.70212400  | -5.83889700 |

H 3.90758400 2.69724500 -6.21075300  
H 4.56279000 1.10574000 -5.83962400  
H 2.94433800 1.24135300 -6.54418300

**26-TS-a**

C 4.98357700 1.80154300 -3.13313700  
C 4.19141900 1.78418500 -1.96444600  
C 3.33237900 0.68659000 -1.77920400  
C 3.34785700 -0.38395800 -2.68167800  
C 4.18540600 -0.34956900 -3.80305700  
C 5.00839900 0.74993600 -4.06554900  
H 2.66699000 0.66582100 -0.92094600  
H 2.69864300 -1.24010500 -2.51748100  
H 4.18359900 -1.18092400 -4.50426600  
O 5.78288600 2.88129900 -3.33212300  
C 5.33266900 3.99326300 -2.56402400  
H 4.49524900 4.48892700 -3.07364600  
Pd 4.51061600 3.41520500 -0.74832100  
C 4.11298700 5.57604900 0.23387000  
H 3.85063300 5.55524400 1.28461300  
H 4.53645100 6.50141900 -0.13849700  
H 3.32010700 5.17757400 -0.41183800  
H 6.17636500 4.67158800 -2.43580000  
I 6.52648100 4.70948000 0.69909800  
C 5.88139200 0.84187600 -5.29086700  
H 5.62046800 1.72010400 -5.89153000  
H 6.93770400 0.95582900 -5.02082200  
H 5.77964800 -0.04841800 -5.91769100  
K 5.83994900 0.63724200 0.26847200  
I 3.20071500 2.32879300 1.63265600

**26-TS-b**

C 4.28857400 2.08041500 -3.40662100  
C 3.97638000 2.03420600 -2.03320400  
C 2.76395000 1.44772000 -1.64664300  
C 1.95063000 0.82108300 -2.60400900  
C 2.32738400 0.81786200 -3.95022300  
C 3.49190300 1.46235600 -4.38466800  
H 2.46091700 1.45544200 -0.60079000  
H 1.02013800 0.35008300 -2.29701400  
H 1.69039300 0.33662600 -4.68918500  
O 5.40122100 2.75921800 -3.77995300  
C 5.80723700 3.68050900 -2.74839300  
H 5.29777100 4.64146400 -2.90466100  
Pd 5.35568800 2.97581600 -0.87511000  
C 4.33867800 5.09327100 0.20035100  
H 4.00271900 4.37858200 0.96078600  
H 4.52081200 6.10385700 0.54160500

H 3.90092300 5.03756600 -0.78896800  
H 6.88789300 3.81596800 -2.83932700  
I 7.01451800 4.99997400 0.30701800  
C 3.86023600 1.91837700 1.68044700  
O 3.61561800 2.96317400 2.37840600  
O 3.10217000 0.91261200 1.56507900  
O 5.07600600 1.88008200 1.04570600  
K 4.52640500 -0.39285900 -0.11233000  
K 6.01802000 3.12731800 3.14716000  
C 3.88748300 1.53747600 -5.83722500  
H 3.98742500 2.57946400 -6.16088600  
H 4.86222300 1.06647200 -6.01035400  
H 3.14897800 1.04457300 -6.47630700

**26-TS-c**

C 3.40451600 2.87589900 -3.31372900  
C 3.57072500 2.17990100 -2.09988700  
C 2.90556700 0.95493300 -1.95094000  
C 2.03278200 0.49008200 -2.94482800  
C 1.85117900 1.23800200 -4.11317500  
C 2.54340300 2.43517500 -4.33299900  
H 3.05261500 0.36685100 -1.04671000  
H 1.50294900 -0.44945800 -2.81074300  
H 1.17872200 0.87383900 -4.88660700  
O 4.11133100 4.02236900 -3.47991200  
C 5.24357500 4.05645100 -2.58538000  
H 5.51680200 5.10522300 -2.45049400  
Pd 4.82835500 3.12211500 -0.81274900  
C 4.28199500 5.29314700 0.33732800  
H 3.79480500 5.36305900 -0.63003200  
H 3.77335600 4.73677900 1.12548200  
H 4.74034000 6.22468000 0.64069100  
H 6.07866300 3.50514500 -3.03748800  
I 6.78501300 4.43524500 0.62170900  
C 3.93031500 2.30012000 2.13906200  
O 4.19871800 1.88706000 0.90989100  
O 3.04076200 3.22399300 2.31495600  
K 4.77623800 -0.47802500 1.71560400  
I 1.14814200 -0.46600300 2.48056700  
K 1.51881300 2.40239700 0.28198800  
O 4.48121800 1.69154400 3.12376200  
K 2.42731900 2.10948100 4.61282300  
C 2.40922000 3.23096600 -5.60579100  
H 2.01658600 4.23514600 -5.40761000  
H 3.38595400 3.37070300 -6.08181000  
H 1.74248300 2.73511900 -6.31711200

**26-TS-d**

|                |             |             |             |           |            |             |             |
|----------------|-------------|-------------|-------------|-----------|------------|-------------|-------------|
| C              | 3.68030200  | 2.56260800  | -3.35318000 | H         | 3.87389700 | 4.87408900  | 0.77273500  |
| C              | 3.91467600  | 1.85308700  | -2.15517200 | H         | 5.15865900 | 6.15258400  | 0.84599200  |
| C              | 3.47273100  | 0.52228400  | -2.10765500 | H         | 6.57894000 | 3.18504000  | -2.59987300 |
| C              | 2.73146200  | -0.03174000 | -3.16432300 | I         | 7.03822500 | 4.23907900  | 0.55777600  |
| C              | 2.45596800  | 0.73820700  | -4.30206900 | K         | 3.03756900 | -0.44586500 | -1.32327300 |
| C              | 2.94269000  | 2.04782600  | -4.43324800 | I         | 3.76520600 | 1.72973500  | 1.71059600  |
| H              | 3.69592400  | -0.10702700 | -1.24683100 | C         | 6.01611700 | -0.13397400 | -1.79951700 |
| H              | 2.38072700  | -1.05879000 | -3.10598300 | O         | 5.60849500 | -1.00397000 | -0.97594700 |
| H              | 1.88576400  | 0.30646200  | -5.12122600 | O         | 6.98718100 | 0.64607700  | -1.68870900 |
| O              | 4.17938100  | 3.82648500  | -3.42987400 | K         | 6.95868900 | 0.32564000  | 0.92603900  |
| C              | 5.24760900  | 4.00729400  | -2.49745200 | O         | 5.21175200 | -0.01213500 | -2.93103300 |
| H              | 5.36915500  | 5.07738500  | -2.33204200 | H         | 5.46050400 | 0.82227800  | -3.36954100 |
| Pd             | 4.84033700  | 3.03633900  | -0.75314200 | C         | 3.03485600 | 2.02837500  | -5.65594400 |
| C              | 3.45195500  | 5.09159700  | 0.03096800  | H         | 3.51736400 | 2.94196500  | -6.01872000 |
| H              | 3.10237900  | 4.82813000  | -0.95599100 | H         | 3.77241100 | 1.22374100  | -5.76217600 |
| H              | 3.07836500  | 4.56282800  | 0.89548600  | H         | 2.18515700 | 1.80136800  | -6.30592600 |
| H              | 3.70676900  | 6.13355200  | 0.16283300  |           |            |             |             |
| H              | 6.17006000  | 3.54946900  | -2.87281000 | <b>27</b> |            |             |             |
| I              | 6.13169200  | 4.81180200  | 0.87784200  |           |            |             |             |
| C              | 2.69371700  | 2.12442800  | 1.59959600  | C         | 3.68261900 | 2.46560700  | -3.06432100 |
| O              | 3.88330000  | 1.59726100  | 1.06311800  | C         | 4.12096700 | 1.80137400  | -1.90805800 |
| O              | 2.84790700  | 2.98767400  | 2.47792100  | C         | 3.45601600 | 0.66328300  | -1.45399800 |
| K              | 0.87228900  | 2.19051400  | -1.39999200 | C         | 2.35277900 | 0.20211500  | -2.18119400 |
| I              | 0.08418800  | 5.37044700  | -0.26147000 | C         | 1.92500600 | 0.87392000  | -3.33160400 |
| O              | 1.61734900  | 1.68050600  | 1.09884700  | C         | 2.57786800 | 2.01688300  | -3.80398600 |
| K              | 0.41425700  | 3.74887600  | 2.74213400  | H         | 3.77494400 | 0.15317200  | -0.55010800 |
| H              | 3.61011000  | 0.85744800  | 0.50112500  | H         | 1.81800300 | -0.68111000 | -1.84199000 |
| C              | 2.72370900  | 2.88005200  | -5.67035400 | H         | 1.06366600 | 0.50278100  | -3.88186900 |
| H              | 2.22451100  | 3.82536100  | -5.43040200 | O         | 4.34471800 | 3.59314200  | -3.44814300 |
| H              | 3.68101100  | 3.14489700  | -6.13204000 | C         | 5.65009900 | 3.65120200  | -2.89518600 |
| H              | 2.11961400  | 2.34444400  | -6.40799700 | H         | 5.94856000 | 4.69369200  | -2.79353700 |
|                |             |             |             | Pd        | 5.78611500 | 2.61501600  | -1.13878600 |
| <b>26-TS-e</b> |             |             |             | C         | 4.54237900 | 4.00520300  | -0.26773200 |
| C              | 3.52956200  | 2.55588500  | -3.23784800 | H         | 4.23032900 | 3.49937800  | 0.64657500  |
| C              | 3.20272700  | 2.67759300  | -1.87439400 | H         | 5.22331800 | 4.84010500  | -0.10131500 |
| C              | 1.86315800  | 2.50591900  | -1.50231200 | H         | 3.71793600 | 4.26759200  | -0.92584300 |
| C              | 0.90550700  | 2.13809800  | -2.46198900 | H         | 6.36158600 | 3.09075200  | -3.51915400 |
| C              | 1.28200400  | 1.96352400  | -3.79897000 | I         | 8.42654000 | 3.63778200  | -0.66560400 |
| C              | 2.60106600  | 2.18222600  | -4.22083000 | C         | 5.08878300 | 0.95825200  | 1.45229200  |
| H              | 1.57402500  | 2.62352500  | -0.46181900 | O         | 6.04119700 | 1.28695700  | 0.58062900  |
| H              | -0.13055200 | 1.99221700  | -2.16657900 | O         | 4.68173500 | -0.26126900 | 1.46388200  |
| H              | 0.53716600  | 1.67736900  | -4.53790900 | K         | 7.19642700 | 2.86720000  | 2.51183500  |
| O              | 4.83383300  | 2.75639300  | -3.59125300 | I         | 7.70144000 | -0.36336400 | 4.12201300  |
| C              | 5.53789100  | 3.50643800  | -2.57800700 | K         | 7.08482300 | -1.07951200 | 0.62745400  |
| H              | 5.43082000  | 4.57850600  | -2.78029100 | O         | 4.69284000 | 1.83585000  | 2.29846600  |
| Pd             | 4.81594300  | 3.07928600  | -0.70185300 | K         | 4.15370800 | -0.09790000 | 3.99704000  |
| C              | 4.66873700  | 5.39607700  | 0.24959700  | C         | 2.14224600 | 2.76003900  | -5.04030000 |
| H              | 4.47973400  | 5.69020300  | -0.77546100 | H         | 1.82443700 | 3.78041900  | -4.79673200 |

H 2.96694600 2.85304600 -5.75517700  
H 1.31000300 2.25099700 -5.53431200

**28-TS**

C 3.64966100 2.59281400 -3.00382000  
C 3.88390700 2.13716100 -1.69229800  
C 3.21182900 1.01095400 -1.20503200  
C 2.30962000 0.35764500 -2.04771800  
C 2.06827500 0.83427100 -3.34237100  
C 2.72985500 1.95793600 -3.85025400  
H 3.38815600 0.68146200 -0.18277200  
H 1.77427500 -0.51619200 -1.68621700  
H 1.35299900 0.32007900 -3.97954400  
O 4.32800900 3.69273800 -3.41995200  
C 5.63792900 3.74167300 -2.84951800  
H 5.94359700 4.78604200 -2.77070100  
Pd 5.71152200 2.80876200 -1.02683000  
C 3.82741700 3.71628100 -0.36104500  
H 3.31943300 3.15102200 0.41438100  
H 4.53027200 4.43042300 0.08652400  
H 3.15050100 4.23949200 -1.02945800  
H 6.32919000 3.16639600 -3.47237800  
I 8.50627400 2.78537500 -1.13749200  
C 5.12661000 1.37628200 1.85593100  
O 5.94089800 1.84862000 0.91743200  
O 4.43013000 0.32255400 1.60269500  
K 7.79760100 2.55252600 2.59149800  
I 7.97635000 -1.08631800 3.18075300  
K 6.46246600 -0.55569100 -0.06755000  
O 5.16755800 1.92207100 3.01321800  
K 4.64924100 -0.38229700 4.10971300  
C 2.49851800 2.48569600 -5.24273100  
H 2.03322400 3.47790000 -5.21732700  
H 3.44481500 2.59848000 -5.78151100  
H 1.84789900 1.81844700 -5.81438800

**28-TS-a**

C 3.59450500 2.72294400 -3.19262100  
C 3.67307300 2.16768900 -1.89959600  
C 2.89457600 1.04166600 -1.59279000  
C 2.05675100 0.50973000 -2.56891600  
C 1.97773800 1.09506200 -3.84029800  
C 2.74328300 2.21154800 -4.18282200  
H 2.94039400 0.60858900 -0.60080300  
H 1.45106400 -0.36174400 -2.33858700  
H 1.31185300 0.66927000 -4.58660700  
O 4.35705400 3.82091400 -3.44990100  
C 5.59141700 3.75791400 -2.76565700

H 5.97482400 4.76662300 -2.62193700  
Pd 5.43132600 2.72777100 -0.98138200  
C 3.49568700 3.70095900 -0.51739800  
H 2.76502400 3.14323400 0.05794700  
H 4.15142900 4.26253700 0.15689500  
H 3.05808300 4.36022300 -1.26109200  
H 6.29552900 3.10997400 -3.29800000  
I 8.17483600 3.40039700 -0.63344100  
C 2.69345300 2.85666100 -5.54380200  
H 2.32642300 3.88731300 -5.47990400  
H 3.69125500 2.90699300 -5.99218400  
H 2.03701000 2.30066800 -6.21841600  
K 8.35193800 1.21367500 1.88210600  
I 5.08733300 1.08275200 1.45806800

**28-TS-b**

C 3.64774000 2.59875600 -3.02539900  
C 3.91141900 2.07999000 -1.74067300  
C 3.19849000 0.96775100 -1.27395500  
C 2.24370800 0.38430500 -2.10988200  
C 1.98450000 0.91784400 -3.37855300  
C 2.67642400 2.03206300 -3.86449600  
H 3.37768100 0.57583600 -0.27483100  
H 1.68289700 -0.47772600 -1.75971100  
H 1.22788100 0.45901400 -4.01029600  
O 4.33592000 3.69550800 -3.42638100  
C 5.65208100 3.73532200 -2.86620600  
H 5.94841600 4.77923000 -2.75442900  
Pd 5.76790800 2.69559000 -1.10146400  
C 3.92133200 3.61113900 -0.31909300  
H 3.65503600 3.04698200 0.57200600  
H 4.59879300 4.44145000 -0.08629700  
H 3.07221900 3.99875000 -0.87175500  
H 6.34251400 3.19808100 -3.52535600  
I 8.54402700 2.97141800 -1.09974700  
C 5.06781000 1.07188300 1.52897400  
O 4.71329800 1.91252000 2.40868100  
O 4.61694600 -0.10464000 1.37067100  
O 6.07182400 1.46146600 0.67022800  
K 6.26123900 -0.74912300 -0.52886400  
K 6.91904800 3.24261800 2.30260600  
C 2.41823600 2.62679400 -5.22490000  
H 1.99605700 3.63489300 -5.14160000  
H 3.34854100 2.72503200 -5.79373200  
H 1.72022500 2.01108400 -5.79857900

**28-TS-c**

C 3.92415400 2.30400400 -3.24506300

|                |            |             |             |                |            |             |             |
|----------------|------------|-------------|-------------|----------------|------------|-------------|-------------|
| C              | 3.78565700 | 2.02843200  | -1.86681400 | H              | 3.39151300 | 4.35630400  | -1.06432400 |
| C              | 2.76937900 | 1.14331000  | -1.45965700 | H              | 6.34656000 | 3.10803900  | -3.42915400 |
| C              | 1.94832900 | 0.54361300  | -2.41229200 | I              | 8.45278700 | 3.40671300  | -0.87660300 |
| C              | 2.11898700 | 0.82650100  | -3.77876100 | C              | 4.96095800 | 1.70654200  | 1.92049300  |
| C              | 3.10329600 | 1.71174900  | -4.22325200 | O              | 5.87429900 | 1.37766500  | 0.86395900  |
| H              | 2.63876600 | 0.93631200  | -0.40341700 | O              | 4.09042800 | 0.85443700  | 2.16979400  |
| H              | 1.16199000 | -0.13559500 | -2.09507700 | K              | 7.93295700 | 2.89272600  | 2.59391600  |
| H              | 1.46937900 | 0.35372100  | -4.51112600 | I              | 7.30299900 | 1.66522800  | 5.74332400  |
| O              | 4.88209500 | 3.18454200  | -3.62776300 | O              | 5.20760200 | 2.81160800  | 2.44737300  |
| C              | 6.02253300 | 3.11895700  | -2.78546500 | K              | 4.08908100 | 1.77534400  | 4.73186900  |
| H              | 6.54422400 | 4.07320400  | -2.82799300 | H              | 5.66801100 | 0.46981600  | 0.59109800  |
| Pd             | 5.55601900 | 2.46873400  | -0.88492400 | C              | 2.50438900 | 2.48423700  | -5.21517900 |
| C              | 3.76547700 | 3.76594900  | -0.76704200 | H              | 2.09375700 | 3.49919500  | -5.17037900 |
| H              | 2.94864500 | 3.42077200  | -0.14232600 | H              | 3.43822300 | 2.54843000  | -5.78339700 |
| H              | 4.47374300 | 4.35384200  | -0.17472800 | H              | 1.80334100 | 1.85452600  | -5.76884000 |
| H              | 3.43925300 | 4.32918800  | -1.63675700 |                |            |             |             |
| H              | 6.63083300 | 2.24511900  | -3.05583500 |                |            |             |             |
| I              | 8.12005300 | 3.33805200  | -0.10776200 | <b>28-TS-e</b> |            |             |             |
| K              | 5.19486100 | -0.95430400 | -2.28556100 | C              | 3.91173500 | 2.42434000  | -3.24103400 |
| I              | 5.01115500 | 0.92646200  | 1.46818200  | C              | 3.86359200 | 2.07844300  | -1.87511100 |
| C              | 8.09054800 | -0.58836500 | -1.92216000 | C              | 3.03314900 | 1.03000000  | -1.45587700 |
| O              | 7.41097100 | -1.44045000 | -1.22149400 | C              | 2.30599000 | 0.31385400  | -2.41148700 |
| O              | 9.29198800 | -0.26473000 | -1.55790300 | C              | 2.38366400 | 0.65825000  | -3.76757300 |
| K              | 8.39000100 | -0.33882700 | 0.91467400  | C              | 3.17784500 | 1.72204200  | -4.21090300 |
| K              | 9.46592000 | 1.72068000  | -3.07008400 | H              | 2.96029300 | 0.78928300  | -0.40092200 |
| O              | 7.53395500 | 0.00250300  | -2.95685300 | H              | 1.66135700 | -0.50102400 | -2.09475100 |
| C              | 3.31316600 | 2.04067400  | -5.67865200 | H              | 1.80888900 | 0.09545300  | -4.49857100 |
| H              | 3.11252100 | 3.09972100  | -5.87460400 | O              | 4.68089300 | 3.48020800  | -3.60241900 |
| H              | 4.35134800 | 1.85890800  | -5.97584600 | C              | 5.85152100 | 3.59519300  | -2.79088500 |
| H              | 2.65614200 | 1.44375000  | -6.31663500 | H              | 6.10955200 | 4.64960600  | -2.68444600 |
|                |            |             |             | Pd             | 5.55964700 | 2.74667700  | -0.91416100 |
|                |            |             |             | C              | 3.66658300 | 3.82978200  | -0.71671800 |
| <b>28-TS-d</b> |            |             |             | H              | 2.91258700 | 3.37258900  | -0.08508600 |
| C              | 3.68266900 | 2.55312000  | -2.98619300 | H              | 4.29873700 | 4.50309800  | -0.12498000 |
| C              | 3.94106100 | 2.08099000  | -1.68718500 | H              | 3.26575600 | 4.34392200  | -1.58577500 |
| C              | 3.26500100 | 0.95002200  | -1.20873800 | H              | 6.66407200 | 3.02701100  | -3.24776100 |
| C              | 2.34892700 | 0.31494700  | -2.04390100 | I              | 8.32146700 | 2.55786700  | -0.74036400 |
| C              | 2.09453900 | 0.80968500  | -3.33132300 | K              | 5.94023900 | -0.56941600 | -1.84472200 |
| C              | 2.75007500 | 1.93699000  | -3.83321100 | I              | 5.06320900 | 1.51121100  | 1.64425600  |
| H              | 3.41595800 | 0.61083900  | -0.18787200 | C              | 8.53168000 | -1.62213600 | -0.50801900 |
| H              | 1.81513500 | -0.56154000 | -1.68900100 | O              | 7.37505500 | -1.63702800 | -0.00112100 |
| H              | 1.37029000 | 0.30412500  | -3.96450900 | O              | 9.63358100 | -1.46477700 | 0.04622400  |
| O              | 4.35219100 | 3.66881800  | -3.39394400 | K              | 8.29418300 | 0.00999700  | 1.88852200  |
| C              | 5.65442600 | 3.72963000  | -2.85154800 | O              | 8.52105100 | -1.73904100 | -1.91151800 |
| H              | 5.97292000 | 4.76870600  | -2.78626700 | H              | 9.44486100 | -1.64112200 | -2.18456500 |
| Pd             | 5.76074000 | 2.78164900  | -1.04729800 | C              | 3.26636000 | 2.12856300  | -5.65936000 |
| C              | 3.87441800 | 3.69946000  | -0.34714000 | H              | 2.76138100 | 1.40472700  | -6.30439000 |
| H              | 3.16986000 | 3.13640600  | 0.25622500  | H              | 2.80478500 | 3.10952200  | -5.81951800 |
| H              | 4.56384400 | 4.24401800  | 0.30527400  | H              | 4.30913400 | 2.21990600  | -5.97970800 |

**29**

|    |            |             |             |
|----|------------|-------------|-------------|
| C  | 3.69602500 | 2.49417000  | -2.65770800 |
| C  | 2.73032000 | 2.56226700  | -1.63899800 |
| C  | 1.68474900 | 1.63113600  | -1.67245300 |
| C  | 1.57611400 | 0.70251500  | -2.70868200 |
| C  | 2.50606000 | 0.71350900  | -3.75163100 |
| C  | 3.58346800 | 1.61395200  | -3.75296700 |
| H  | 0.94382000 | 1.64842400  | -0.87820400 |
| H  | 0.74984100 | -0.00273200 | -2.72450900 |
| H  | 2.38807000 | 0.03669300  | -4.59489200 |
| O  | 4.73671500 | 3.41105800  | -2.60864400 |
| C  | 6.04006700 | 2.94001400  | -2.53926500 |
| H  | 6.67191700 | 3.65819700  | -3.06213100 |
| Pd | 6.79347100 | 2.92488400  | -0.65895900 |
| C  | 2.77709600 | 3.64316600  | -0.59060000 |
| H  | 2.28896100 | 3.31357700  | 0.32910100  |
| H  | 3.79965500 | 3.93058500  | -0.34968700 |
| H  | 2.25431500 | 4.53573900  | -0.95743000 |
| H  | 6.17076600 | 1.89333900  | -2.83762200 |
| I  | 9.27299400 | 3.79365300  | -1.44133200 |
| K  | 4.81506600 | -0.88503000 | -1.89102200 |
| I  | 5.22191300 | 1.32891900  | 0.92150500  |
| C  | 7.72053800 | -0.64959900 | -2.49955800 |
| O  | 7.26575000 | -1.36982900 | -1.52722600 |
| O  | 8.97717500 | -0.32729600 | -2.53320200 |
| K  | 8.87741000 | -0.04932500 | 0.03688600  |
| K  | 8.79315800 | 1.41436500  | -4.30689100 |
| O  | 6.89973900 | -0.17673800 | -3.41187800 |
| C  | 4.55063400 | 1.63961600  | -4.91551600 |
| H  | 4.94893500 | 2.64718700  | -5.06759200 |
| H  | 5.39059900 | 0.95569600  | -4.74826000 |
| H  | 4.04004800 | 1.33431900  | -5.83362300 |

**30-TS**

|    |             |             |             |
|----|-------------|-------------|-------------|
| Pd | 2.94709500  | 0.56452300  | 1.77231600  |
| C  | 2.85804300  | 2.28522100  | -0.76602400 |
| C  | 2.17726300  | 1.31062800  | -0.02445300 |
| C  | 0.77150400  | 1.36517700  | 0.00980500  |
| C  | 0.16581500  | 2.51877100  | -0.52139100 |
| C  | 0.91689700  | 3.53963300  | -1.12668600 |
| C  | 2.31395600  | 3.44184000  | -1.29930600 |
| H  | 0.17508900  | 0.58760900  | 0.47365100  |
| H  | -0.91418800 | 2.62473200  | -0.46054000 |
| H  | 0.40534600  | 4.41332200  | -1.52361100 |
| O  | 4.11414400  | 1.72365600  | -0.92493600 |
| C  | 3.69994200  | 0.43617600  | -0.34693600 |
| H  | 3.45789100  | -0.27549700 | -1.13612400 |

|   |            |            |             |
|---|------------|------------|-------------|
| H | 4.51221500 | 0.03907200 | 0.28643100  |
| K | 6.13782900 | 3.27317300 | 0.13592900  |
| I | 2.60730900 | 0.57996700 | 4.47380800  |
| C | 4.80486800 | 4.36792500 | 2.48007900  |
| O | 5.99364100 | 3.83241900 | 2.59321700  |
| O | 4.09549400 | 4.59420900 | 3.54075000  |
| K | 5.34031600 | 2.80384000 | 4.86310000  |
| O | 4.30422700 | 4.59441600 | 1.29811800  |
| K | 1.94360200 | 3.97489900 | 2.28103500  |
| C | 3.15406500 | 4.49894200 | -1.96279200 |
| H | 2.54038900 | 5.18695300 | -2.55092800 |
| H | 3.68299000 | 5.07751300 | -1.19510300 |
| H | 3.89704900 | 4.05271900 | -2.63460500 |

**31**

|    |             |             |             |
|----|-------------|-------------|-------------|
| Pd | 2.14008800  | 1.00770600  | 1.68215000  |
| C  | 2.93889600  | 2.10544900  | -1.00049000 |
| C  | 2.25193900  | 0.98657900  | -0.48294100 |
| C  | 0.87437800  | 1.08341700  | -0.15538100 |
| C  | 0.32148500  | 2.39852300  | -0.33292200 |
| C  | 1.06814000  | 3.46850500  | -0.82193000 |
| C  | 2.44190200  | 3.36772400  | -1.20664100 |
| H  | 0.21644300  | 0.22731500  | -0.03772700 |
| H  | -0.73281100 | 2.54766100  | -0.11620700 |
| H  | 0.57404000  | 4.42825800  | -0.96601000 |
| O  | 4.10434800  | 1.41929800  | -1.38101600 |
| C  | 3.40096500  | 0.14527000  | -1.03684600 |
| H  | 3.18634100  | -0.40797400 | -1.95624000 |
| H  | 3.98414000  | -0.46129400 | -0.34083200 |
| K  | 5.62624700  | 2.41968800  | 0.94088000  |
| I  | 3.40442700  | 0.92401700  | 4.09233900  |
| C  | 4.77401100  | 4.66761200  | 2.55576800  |
| O  | 5.94855800  | 4.16929200  | 2.82427700  |
| O  | 4.03720400  | 5.15733600  | 3.51224800  |
| K  | 5.31949900  | 3.84270000  | 5.26639900  |
| O  | 4.29453800  | 4.58018800  | 1.34981200  |
| K  | 1.91584700  | 4.27922400  | 2.29867300  |
| C  | 3.24894300  | 4.51868000  | -1.73846100 |
| H  | 2.60747500  | 5.26523400  | -2.21718300 |
| H  | 3.79088400  | 4.99554500  | -0.91196000 |
| H  | 3.98266600  | 4.17788800  | -2.47695200 |

**32-TS**

|    |            |             |             |
|----|------------|-------------|-------------|
| Pd | 0.53527400 | -0.36475700 | -0.71480700 |
| C  | 0.56201300 | -2.13117700 | 0.54083000  |
| C  | 0.53965400 | -1.64454300 | 1.85809900  |
| C  | 1.05537300 | -3.41559000 | 0.30784100  |
| C  | 1.13340800 | -2.44259900 | 2.84732400  |



|           |             |             |             |              |             |             |             |
|-----------|-------------|-------------|-------------|--------------|-------------|-------------|-------------|
| H         | 0.17556600  | -0.64970400 | 2.09426600  | O            | -1.11934400 | 2.51376000  | -1.28168800 |
| C         | 1.62824900  | -4.25372300 | 1.25955000  | C            | 4.14867600  | 0.88808100  | -0.47699100 |
| C         | 1.67097700  | -3.70494900 | 2.55009700  | H            | 3.24404400  | 0.98051100  | -1.09184900 |
| H         | 1.21140300  | -2.05947500 | 3.86121900  | H            | 3.98278400  | 1.23892800  | 0.58256600  |
| H         | 2.11559600  | -4.29191900 | 3.34979500  | H            | 4.85583600  | 1.63022800  | -0.85320500 |
| C         | -0.19137100 | -2.55284100 | -1.08167900 | C            | 2.81739200  | 4.04342200  | 0.00448600  |
| H         | -1.22285000 | -2.75714000 | -0.79262500 | H            | 3.44326400  | 4.16247200  | 0.90759800  |
| H         | -0.13449500 | -2.11435300 | -2.08303300 | H            | 2.50473400  | 5.05814600  | -0.30112000 |
| I         | 1.04181700  | 2.28196200  | -1.14815600 | O            | 1.70722400  | 3.21628600  | 0.22372600  |
| C         | 2.43357000  | -0.78570500 | -1.35591400 | H            | 3.48095200  | 3.67286500  | -0.79929100 |
| H         | 2.49062400  | -1.86608400 | -1.51030400 | H            | 1.20538400  | 2.53189600  | -1.12831800 |
| H         | 2.61256000  | -0.24151300 | -2.28357700 | C            | -0.77074600 | 0.50714000  | 1.37861100  |
| H         | 3.12669500  | -0.45834000 | -0.57877100 | O            | -0.54720500 | -0.51518600 | 0.63753800  |
| O         | 0.68416700  | -3.68499600 | -0.98061700 | O            | 0.22083300  | 1.22904400  | 1.87497500  |
| C         | -2.58941900 | -0.50018100 | -0.71908000 | K            | 0.49984500  | -1.30560400 | -1.61984200 |
| O         | -1.57709800 | -0.08614400 | 0.03969800  | I            | -3.00135600 | -3.10796900 | -1.07590600 |
| O         | -3.11412400 | -1.65582400 | -0.45731800 | K            | -0.72749000 | 3.54012300  | 1.07645100  |
| K         | -2.36329700 | 2.45060900  | -0.30397500 | O            | -1.96760400 | 0.86363600  | 1.69036000  |
| I         | -5.18391600 | 1.05998200  | 1.81439200  | O            | -0.78562900 | 0.74426500  | -2.63568400 |
| K         | -2.64038400 | -1.43131400 | 2.10429400  | K            | -2.32129900 | -1.86271200 | 2.01351600  |
| O         | -3.06963500 | 0.27435400  | -1.61536000 | K            | -2.92468500 | 0.51247000  | -1.09300800 |
| K         | -5.43188100 | -0.72162100 | -1.27234800 |              |             |             |             |
| C         | 2.10903600  | -5.63711900 | 0.91356400  |              |             |             |             |
| H         | 2.43925400  | -6.17511600 | 1.80585100  | <b>34-TS</b> |             |             |             |
| H         | 1.31520600  | -6.21887700 | 0.43218400  | C            | 7.36795700  | 0.40939200  | -5.37833400 |
| H         | 2.94674000  | -5.59836800 | 0.20841500  | C            | 7.03349000  | -0.00120900 | -6.68107700 |
|           |             |             |             | C            | 7.44369000  | -1.27383500 | -7.09444100 |
| <b>33</b> |             |             |             | C            | 8.16788500  | -2.10593600 | -6.24212500 |
| C         | 3.96186000  | -1.62352300 | -0.11789000 | C            | 8.50894300  | -1.66340900 | -4.96489800 |
| C         | 4.47834400  | -2.92770800 | -0.17099700 | C            | 8.12318100  | -0.39601600 | -4.50978800 |
| C         | 5.79265900  | -3.10104700 | -0.61804400 | H            | 7.19776800  | -1.60647300 | -8.09988600 |
| C         | 6.57167600  | -2.00643100 | -0.99135500 | H            | 8.47617100  | -3.09222200 | -6.57686000 |
| C         | 6.03771500  | -0.72014600 | -0.92889000 | H            | 9.08568200  | -2.30531400 | -4.30371200 |
| C         | 4.72302200  | -0.50391800 | -0.49862300 | O            | 6.99427600  | 1.68035900  | -4.96077000 |
| H         | 6.20684100  | -4.10476300 | -0.66490100 | C            | 5.60202800  | 1.85019000  | -4.61584600 |
| H         | 7.59222900  | -2.15436800 | -1.33118900 | H            | 4.99903200  | 1.09507400  | -5.12086900 |
| H         | 6.64155900  | 0.13295800  | -1.22672000 | Pd           | 5.36148300  | 1.82664300  | -2.59611600 |
| O         | 2.63755900  | -1.50188400 | 0.27082900  | C            | 6.27833600  | 0.91459200  | -7.61478700 |
| C         | 2.36629600  | -0.74064700 | 1.46815100  | H            | 6.49802700  | 0.67009400  | -8.65791700 |
| H         | 3.20827100  | -0.84151500 | 2.16712700  | H            | 5.19355200  | 0.83168300  | -7.47843600 |
| Pd        | 2.07910200  | 1.18663500  | 0.96460500  | H            | 6.54244400  | 1.96028000  | -7.43436300 |
| C         | 3.61468200  | -4.09348200 | 0.24286100  | H            | 5.32982900  | 2.87137300  | -4.89045700 |
| H         | 4.18711100  | -5.02464400 | 0.24456100  | C            | 7.97946200  | 3.43993100  | -0.32145600 |
| H         | 3.19584400  | -3.93947000 | 1.24227300  | O            | 7.81267700  | 2.09535600  | -0.53715400 |
| H         | 2.76241100  | -4.22261900 | -0.43489600 | O            | 7.22122200  | 4.00862600  | 0.52343600  |
| H         | 1.43337400  | -1.12640500 | 1.87188200  | C            | 8.54178200  | 0.09883000  | -3.14844700 |
| C         | -0.37896700 | 1.71979800  | -1.94234600 | H            | 9.42219500  | 0.75296700  | -3.21415700 |
| O         | 0.97277900  | 1.87096300  | -1.86672300 | H            | 7.75638600  | 0.66929000  | -2.64799600 |
|           |             |             |             | H            | 8.82282900  | -0.73364700 | -2.49729800 |

|   |            |             |             |   |            |            |             |
|---|------------|-------------|-------------|---|------------|------------|-------------|
| C | 4.87864800 | 0.21841000  | -1.01987700 | H | 6.40518800 | 4.33198000 | -4.07627000 |
| H | 3.86662200 | -0.20701400 | -1.07497900 | H | 5.62093000 | 4.70492700 | -2.52869600 |
| H | 5.67755100 | -0.53558300 | -0.98291500 | O | 2.75651700 | 0.15408900 | -0.49580700 |
| O | 5.04805600 | 1.33769000  | -0.38336600 | C | 5.39805700 | 3.98245600 | 0.04072500  |
| H | 4.92592200 | 0.26609500  | -2.65684600 | O | 4.44893000 | 3.37911400 | -0.67343600 |
| H | 6.96359300 | 1.81709900  | -0.14251200 | O | 5.26518600 | 5.25200600 | 0.25348000  |
| C | 5.57743900 | 4.96533900  | -2.94737800 | K | 2.64676700 | 4.91684000 | 0.40034300  |
| O | 5.65631700 | 5.02015900  | -4.21570700 | I | 3.40698200 | 3.67044700 | 3.60207900  |
| O | 5.90043400 | 3.84763300  | -2.31095800 | O | 6.34451500 | 3.29645700 | 0.55682100  |
| K | 8.36152800 | 3.76632800  | -3.66248400 | K | 4.73676200 | 1.11822300 | 1.07840200  |
| I | 8.95533500 | 7.64738700  | -3.78194100 | K | 6.53504700 | 4.98810300 | 2.51275200  |
| K | 4.67546800 | 4.00768600  | -0.02455100 |   |            |            |             |
| O | 5.27156700 | 5.98036100  | -2.20010200 |   |            |            |             |
| O | 8.87199200 | 3.98754700  | -1.01885500 |   |            |            |             |
| K | 5.57720800 | 7.56172400  | -4.38319200 |   |            |            |             |
| K | 7.80156300 | 6.37877500  | -0.72788700 |   |            |            |             |

**34'-TS**

|    |             |             |             |
|----|-------------|-------------|-------------|
| C  | 3.21459900  | 4.87387400  | -3.64940800 |
| C  | 3.04035500  | 6.00600400  | -2.83070500 |
| C  | 1.75352300  | 6.26435800  | -2.32794000 |
| C  | 0.67383600  | 5.42836100  | -2.62447100 |
| C  | 0.86905500  | 4.33187100  | -3.47057700 |
| C  | 2.13271600  | 4.04330800  | -4.00715900 |
| H  | 1.59280500  | 7.16677900  | -1.73928900 |
| H  | -0.31947300 | 5.66415700  | -2.25125800 |
| H  | 0.01355200  | 3.73386000  | -3.78413200 |
| O  | 4.42230500  | 4.62904300  | -4.25746700 |
| C  | 5.51573900  | 4.15746300  | -3.46686900 |
| Pd | 5.16490000  | 2.28955500  | -2.42759900 |
| C  | 4.18992900  | 6.92837300  | -2.51267500 |
| H  | 3.82446400  | 7.93530400  | -2.28712800 |
| H  | 4.74907700  | 6.56158400  | -1.64164200 |
| H  | 4.87990600  | 6.98956900  | -3.35832800 |
| C  | 3.50527100  | 0.13084500  | -1.53807200 |
| O  | 2.98867500  | -0.08886300 | -2.71324600 |
| O  | 4.78788900  | 0.38733400  | -1.43614100 |
| C  | 2.33505800  | 2.92479600  | -4.99596800 |
| H  | 2.74769000  | 3.31620800  | -5.93137000 |
| H  | 3.04444700  | 2.16849500  | -4.64800300 |
| H  | 1.38431800  | 2.43258500  | -5.23006100 |
| C  | 5.68171600  | 0.98536200  | -4.15057400 |
| H  | 6.31234200  | 1.35584600  | -4.96613600 |
| H  | 5.67078400  | 2.64695400  | -3.87257800 |
| H  | 6.25216600  | 0.34086200  | -3.47484700 |
| O  | 4.52035000  | 0.48298800  | -4.63417600 |
| H  | 3.94269800  | 0.13923900  | -3.84834400 |
| K  | 0.89332300  | 1.10050700  | -1.97052700 |

**34-TS-a**

|    |             |             |             |
|----|-------------|-------------|-------------|
| C  | 5.42408700  | -0.77952700 | -4.27048500 |
| C  | 4.71141900  | -0.23401100 | -5.35955700 |
| C  | 3.43338800  | 0.29213200  | -5.11985400 |
| C  | 2.86698100  | 0.26250500  | -3.84136100 |
| C  | 3.58962100  | -0.28813400 | -2.77929000 |
| C  | 4.87744700  | -0.80940900 | -2.97092000 |
| H  | 2.86711400  | 0.69608500  | -5.95599000 |
| H  | 1.86042300  | 0.64168000  | -3.68126600 |
| H  | 3.15802500  | -0.31688800 | -1.78183000 |
| O  | 6.63296400  | -1.41096400 | -4.45620100 |
| C  | 7.79363000  | -0.66001100 | -4.80077200 |
| H  | 7.66976600  | -0.13397300 | -5.74845800 |
| Pd | 8.35242100  | 0.80835900  | -3.47859300 |
| C  | 5.28240900  | -0.24371100 | -6.75565100 |
| H  | 4.48321200  | -0.18967100 | -7.50083500 |
| H  | 5.94857100  | 0.61204900  | -6.91569900 |
| H  | 5.86184000  | -1.15418200 | -6.93189700 |
| H  | 8.59422100  | -1.39590900 | -4.87735100 |
| C  | 6.34747600  | 2.28474500  | 0.02852400  |
| O  | 7.65018600  | 2.53994400  | 0.44430000  |
| O  | 6.22426300  | 1.83110800  | -1.14532100 |
| C  | 5.66755600  | -1.34637700 | -1.80633100 |
| H  | 5.00406700  | -1.79511600 | -1.06007400 |
| H  | 6.39976000  | -2.08655900 | -2.13213300 |
| H  | 6.19907000  | -0.51397700 | -1.33270200 |
| C  | 9.65911000  | 0.62879100  | -1.56399200 |
| H  | 9.26082600  | 0.03754500  | -0.72661100 |
| H  | 10.60112500 | 0.25470500  | -1.98674100 |
| O  | 9.39086100  | 1.88364800  | -1.62296800 |
| H  | 8.61772500  | -0.42833300 | -2.50732500 |
| H  | 8.23818800  | 2.18351400  | -0.25924100 |
| K  | 8.15244400  | 4.32291300  | -1.94635100 |
| I  | 7.79392400  | 2.92295400  | -5.26701400 |
| O  | 5.45118200  | 2.57133600  | 0.85091500  |
| C  | 5.75824200  | 6.14108600  | -1.38733200 |

|                |            |             |             |                |             |             |             |
|----------------|------------|-------------|-------------|----------------|-------------|-------------|-------------|
| O              | 4.98168300 | 6.85125000  | -0.61211200 | <b>34-TS-c</b> |             |             |             |
| O              | 5.41721500 | 4.93393900  | -1.71016400 | C              | 9.15538000  | 2.83893800  | -3.45158900 |
| O              | 6.89410900 | 6.63212500  | -1.78897400 | C              | 9.45039300  | 3.60524100  | -4.58969900 |
| K              | 4.93068400 | 2.80130400  | -3.12144400 | C              | 10.79183700 | 3.92035800  | -4.83592500 |
| K              | 6.37428300 | 8.91921500  | -0.94505700 | C              | 11.79605600 | 3.47434500  | -3.97656200 |
| K              | 4.15477700 | 4.70161700  | 0.62657700  | C              | 11.47181900 | 2.70457800  | -2.85923600 |
|                |            |             |             | C              | 10.14228600 | 2.36943500  | -2.57007100 |
| <b>34-TS-b</b> |            |             |             | H              | 11.04530400 | 4.51571800  | -5.70949500 |
| C              | 7.20633200 | 0.41443300  | -5.68330000 | H              | 12.83357500 | 3.72417400  | -4.17968600 |
| C              | 6.68594900 | 0.22905600  | -6.97803300 | H              | 12.25752800 | 2.35317400  | -2.19553900 |
| C              | 6.64840000 | -1.07200000 | -7.49384800 | O              | 7.81386700  | 2.60058800  | -3.15229200 |
| C              | 7.12492700 | -2.15460300 | -6.75794400 | C              | 7.22867200  | 1.40619400  | -3.70868900 |
| C              | 7.67825500 | -1.94062300 | -5.49664900 | H              | 8.02005600  | 0.70789900  | -3.98445900 |
| C              | 7.73786400 | -0.65701600 | -4.94171400 | Pd             | 5.94803500  | 0.69266600  | -2.28569600 |
| H              | 6.25202900 | -1.22819200 | -8.49418200 | C              | 8.34502300  | 4.05259500  | -5.51511300 |
| H              | 7.08432700 | -3.15736800 | -7.17307900 | H              | 8.68343000  | 4.85592600  | -6.17527800 |
| H              | 8.07728800 | -2.77797500 | -4.92964100 | H              | 8.00049000  | 3.22534800  | -6.14674200 |
| O              | 7.27297200 | 1.68834200  | -5.14577400 | H              | 7.46849000  | 4.39812800  | -4.95860900 |
| C              | 6.00868600 | 2.29606200  | -4.77453100 | H              | 6.61172600  | 1.66447500  | -4.57324100 |
| H              | 5.21755300 | 1.97868800  | -5.45526500 | C              | 6.81204900  | 2.38408200  | 0.85252000  |
| Pd             | 5.43690100 | 1.94024000  | -2.85806300 | O              | 7.03744400  | 1.06211100  | 1.17048200  |
| C              | 6.22431900 | 1.39604100  | -7.81972800 | O              | 5.61191400  | 2.69100400  | 0.53625100  |
| H              | 6.41570600 | 1.20033300  | -8.87907200 | C              | 9.77531400  | 1.54546000  | -1.36093000 |
| H              | 5.14933400 | 1.58190100  | -7.71208900 | H              | 9.29141600  | 2.14197500  | -0.57857000 |
| H              | 6.74340400 | 2.31477300  | -7.53564700 | H              | 9.06997600  | 0.75124900  | -1.61958100 |
| H              | 6.16250200 | 3.37563900  | -4.81174300 | H              | 10.66695200 | 1.08630300  | -0.92479600 |
| C              | 8.01559100 | 3.05794700  | -0.03874300 | C              | 5.99316400  | -1.15401600 | -0.85079300 |
| O              | 7.76908000 | 1.78606500  | -0.53415300 | H              | 5.76896500  | -2.01074100 | -1.49962200 |
| O              | 7.11292100 | 3.59911500  | 0.65664200  | H              | 6.91649600  | -1.22745300 | -0.26141100 |
| C              | 8.41784800 | -0.43377800 | -3.61297200 | O              | 5.03817400  | -0.40797500 | -0.43248000 |
| H              | 9.41371900 | 0.01157500  | -3.75190700 | H              | 7.08600700  | -0.40338800 | -2.08702800 |
| H              | 7.83793700 | 0.21795500  | -2.95644400 | H              | 6.22829000  | 0.58916300  | 0.91116300  |
| H              | 8.57162800 | -1.38047400 | -3.08768900 | I              | 3.98003200  | 2.60971800  | -3.01102000 |
| C              | 5.14459700 | 0.10429000  | -1.53781900 | K              | 3.38868800  | 1.52630500  | 0.22251100  |
| H              | 4.22450500 | -0.42112700 | -1.82668800 | O              | 7.79813000  | 3.14440000  | 0.85357100  |
| H              | 6.02497000 | -0.54727600 | -1.44757700 | K              | 6.79730100  | 4.32274200  | -1.29019000 |
| O              | 5.05189900 | 1.13421100  | -0.75094000 |                |             |             |             |
| H              | 5.54914300 | 0.35506700  | -3.16494000 | <b>34-TS-d</b> |             |             |             |
| H              | 6.82908300 | 1.55933200  | -0.35721800 | C              | 5.99420300  | -0.99644800 | -4.70725900 |
| C              | 5.96775900 | 4.89095200  | -2.22831700 | C              | 4.79212500  | -0.62644400 | -5.34259900 |
| O              | 7.13973200 | 4.85375800  | -2.74633900 | C              | 3.68345600  | -1.47664300 | -5.20138700 |
| O              | 5.06795300 | 3.94994100  | -2.51148200 | C              | 3.76669700  | -2.66515300 | -4.46990800 |
| K              | 8.72613800 | 2.86985800  | -3.01964400 | C              | 4.98204400  | -3.02982600 | -3.87874800 |
| K              | 4.51313700 | 3.73397900  | 0.05678800  | C              | 6.11259400  | -2.20974700 | -3.99685100 |
| O              | 5.60841700 | 5.77556800  | -1.37332700 | H              | 2.75327500  | -1.21095200 | -5.69770600 |
| O              | 9.11432500 | 3.55401900  | -0.39943900 | H              | 2.90257100  | -3.31939300 | -4.39114900 |
| K              | 8.02039800 | 6.02461500  | -0.45211700 | H              | 5.06346500  | -3.97056800 | -3.33965300 |
|                |            |             |             | O              | 7.13885900  | -0.24103400 | -4.82486300 |

|                    |            |             |             |                    |             |             |             |
|--------------------|------------|-------------|-------------|--------------------|-------------|-------------|-------------|
| C                  | 7.17541400 | 1.04688600  | -4.20889100 | H                  | 5.30521100  | -3.64714300 | -2.91382600 |
| H                  | 6.55064900 | 1.76475900  | -4.74424700 | H                  | 4.53558000  | -2.47950000 | -1.83101100 |
| Pd                 | 6.47684300 | 1.09718700  | -2.27396800 | H                  | 3.60044700  | -3.87562000 | -2.45663700 |
| C                  | 4.70026100 | 0.61744400  | -6.18948400 | I                  | 3.95092700  | 2.92226600  | -3.33209800 |
| H                  | 3.90579100 | 0.51744700  | -6.93418000 | K                  | 1.58365000  | 0.32796000  | -2.83264000 |
| H                  | 4.47626800 | 1.49932500  | -5.57938800 | C                  | 3.39496000  | -0.68998200 | 0.00285100  |
| H                  | 5.64380400 | 0.80017600  | -6.71090000 | O                  | 2.73604900  | 0.28491800  | -0.53561700 |
| H                  | 8.22202900 | 1.35223100  | -4.23351700 | O                  | 4.65670000  | -0.84156100 | -0.45138700 |
| C                  | 7.74732400 | 3.42274800  | 0.31647700  | O                  | 2.95398300  | -1.48625300 | 0.86752800  |
| O                  | 8.19201700 | 2.17656700  | 0.69736900  | K                  | 5.14281100  | -2.74967200 | 1.11650600  |
| O                  | 6.49602200 | 3.64664900  | 0.47195400  |                    |             |             |             |
| C                  | 7.44971500 | -2.63310700 | -3.44211600 | <b>34-TS-partB</b> |             |             |             |
| H                  | 8.09120200 | -3.01326800 | -4.24572800 | C                  | -0.43716700 | -0.78649700 | 0.68500900  |
| H                  | 7.98044800 | -1.79160100 | -2.99351600 | O                  | -0.34530800 | -0.22569100 | -0.56502400 |
| H                  | 7.33644800 | -3.42944000 | -2.70053900 | O                  | 0.64122300  | -1.17804700 | 1.23781100  |
| C                  | 6.96018300 | -0.38020600 | -0.51292200 | C                  | 1.40684200  | 2.17779200  | 0.88646100  |
| H                  | 6.71420400 | -1.37864200 | -0.90109400 | H                  | 1.29452200  | 1.37118500  | 1.62550500  |
| H                  | 7.97800400 | -0.27516000 | -0.11498200 | H                  | 0.59994600  | 2.91099000  | 1.05268700  |
| O                  | 6.02695700 | 0.38311400  | -0.07052400 | O                  | 1.40705500  | 1.67196000  | -0.44114100 |
| H                  | 7.70491700 | 0.11769700  | -2.02489900 | H                  | 2.35678800  | 2.69588800  | 1.06637400  |
| H                  | 7.38899200 | 1.64915100  | 0.83750600  | H                  | 0.62071000  | 1.03417900  | -0.50361200 |
| K                  | 3.50084000 | -0.61206000 | -1.83214300 | K                  | 2.18583800  | -0.93868900 | -0.69580900 |
| I                  | 1.86322500 | -0.01763800 | 1.03633000  | O                  | -1.59602800 | -0.87057000 | 1.20843100  |
| K                  | 4.41405000 | 2.27577300  | 1.15412600  | K                  | -2.78160700 | 0.33974800  | -0.56912400 |
| I                  | 4.37452900 | 2.89652400  | -2.76983100 |                    |             |             |             |
| O                  | 8.58688000 | 4.19802300  | -0.17701800 | <b>35</b>          |             |             |             |
| K                  | 6.72412400 | 5.34168700  | -1.53671200 | C                  | 3.69742100  | 3.78964800  | -4.57610600 |
|                    |            |             |             | C                  | 2.61548000  | 4.15357900  | -3.74407400 |
| <b>34-TS-partA</b> |            |             |             | C                  | 1.41254400  | 3.44459800  | -3.86907600 |
| C                  | 4.78895500 | -1.24781000 | -4.31977400 | C                  | 1.26394300  | 2.43954200  | -4.82537000 |
| C                  | 4.47717500 | -0.49785700 | -5.47017000 | C                  | 2.34291000  | 2.10302700  | -5.65282000 |
| C                  | 3.24184400 | -0.72907800 | -6.09389400 | C                  | 3.57769600  | 2.75150900  | -5.52723800 |
| C                  | 2.36020400 | -1.70683200 | -5.62815300 | H                  | 0.57184500  | 3.72098600  | -3.23795500 |
| C                  | 2.72631100 | -2.49717400 | -4.53139200 | H                  | 0.30369800  | 1.94398900  | -4.94930700 |
| C                  | 3.94211300 | -2.28398700 | -3.86966900 | H                  | 2.22319500  | 1.34492500  | -6.42542600 |
| H                  | 2.98719700 | -0.14733500 | -6.97630700 | O                  | 4.86356000  | 4.52520600  | -4.57545400 |
| H                  | 1.42073100 | -1.88697300 | -6.14437400 | C                  | 5.76177600  | 4.33094500  | -3.44225900 |
| H                  | 2.07291000 | -3.29867700 | -4.19323100 | Pd                 | 5.09363400  | 2.71952500  | -2.42744000 |
| O                  | 5.96130300 | -1.07152500 | -3.62289300 | C                  | 2.74596800  | 5.31231400  | -2.78558100 |
| C                  | 6.19063800 | 0.19276300  | -2.95989500 | H                  | 1.76270100  | 5.70132600  | -2.50734800 |
| H                  | 6.44860800 | 0.97385000  | -3.67688100 | H                  | 3.26488800  | 5.01575800  | -1.86704500 |
| Pd                 | 4.58444700 | 0.72065700  | -1.85226900 | H                  | 3.33162200  | 6.11616400  | -3.24054500 |
| C                  | 5.45303500 | 0.49301200  | -6.04927000 | C                  | 5.69726100  | -1.08803800 | -2.96145800 |
| H                  | 5.27702200 | 0.62142500  | -7.12129300 | O                  | 4.87328000  | -2.00663400 | -3.22384300 |
| H                  | 5.35181800 | 1.47325100  | -5.57250400 | O                  | 5.77178500  | -0.09830400 | -3.92240600 |
| H                  | 6.48137800 | 0.15072000  | -5.90335300 | C                  | 4.76393200  | 2.37024800  | -6.37378800 |
| H                  | 7.02301200 | 0.00153900  | -2.27661700 | H                  | 4.46200500  | 1.73948200  | -7.21482200 |
| C                  | 4.36440700 | -3.12871500 | -2.69567800 | H                  | 5.27492200  | 3.25753400  | -6.75528200 |

|              |             |             |             |                |             |             |             |
|--------------|-------------|-------------|-------------|----------------|-------------|-------------|-------------|
| H            | 5.48815400  | 1.80741900  | -5.77491600 | H              | 5.84046900  | 4.93137900  | -2.03113900 |
| H            | 6.52563900  | 2.77379700  | -1.85131200 | O              | 5.50607100  | 0.33753300  | -1.00184200 |
| H            | 6.21358600  | 0.66984700  | -3.51643600 | C              | 5.49474900  | 3.08544900  | 0.79738100  |
| K            | 2.76820900  | -0.38142700 | -3.51125700 | O              | 4.75640700  | 3.23932900  | -0.27329400 |
| H            | 6.76479400  | 4.24177400  | -3.86548900 | O              | 4.89767100  | 2.95358000  | 1.93903000  |
| H            | 5.71175000  | 5.21843200  | -2.79863600 | K              | 7.99835600  | 1.17955500  | -0.61204700 |
| O            | 6.41004300  | -0.97088400 | -1.92835700 | I              | 8.87850000  | 0.56121000  | 2.97714600  |
| C            | 3.58598200  | 0.58132100  | -0.59380100 | K              | 5.47476600  | 0.28125600  | 2.19674600  |
| O            | 3.95187100  | 1.03069800  | -1.76943300 | O              | 6.77817700  | 3.04593400  | 0.70785000  |
| O            | 2.85326400  | -0.49613300 | -0.56436300 | K              | 7.26152000  | 3.69563100  | 3.13093300  |
| K            | 6.57351100  | 0.76738200  | 0.06677800  |                |             |             |             |
| I            | 5.64165600  | -2.02690300 | 2.60260800  | <b>36-TS-a</b> |             |             |             |
| K            | 4.72367900  | -2.74165400 | -0.68730900 | C              | 3.04470100  | 4.51665000  | -3.04963200 |
| O            | 3.98612100  | 1.16413800  | 0.47295100  | C              | 2.67620800  | 5.42548200  | -2.03591400 |
| K            | 2.68935200  | -0.26442600 | 2.12758900  | C              | 1.39022000  | 5.31574800  | -1.48377400 |
|              |             |             |             | C              | 0.47687800  | 4.36605100  | -1.94892200 |
| <b>36-TS</b> |             |             |             | C              | 0.84482900  | 3.51262700  | -2.99629400 |
| C            | 3.15637100  | 4.61532000  | -2.84596400 | C              | 2.12711100  | 3.57173100  | -3.56189800 |
| C            | 2.84455300  | 5.41539400  | -1.72922000 | H              | 1.09527700  | 6.01502800  | -0.70525000 |
| C            | 1.55671500  | 5.31658300  | -1.18153800 | H              | -0.52728500 | 4.32396400  | -1.53439500 |
| C            | 0.60248700  | 4.45028600  | -1.72468500 | H              | 0.12469000  | 2.80485300  | -3.40100800 |
| C            | 0.93493100  | 3.66719000  | -2.83504900 | O              | 4.26765000  | 4.57360300  | -3.66944400 |
| C            | 2.20996300  | 3.73714300  | -3.41515900 | C              | 5.46459400  | 4.31274900  | -2.92947200 |
| H            | 1.29840100  | 5.94690900  | -0.33338500 | Pd             | 5.53874100  | 2.51037200  | -1.98611300 |
| H            | -0.40073800 | 4.41058200  | -1.30726800 | C              | 3.59765200  | 6.53466100  | -1.59517100 |
| H            | 0.19420100  | 3.00400900  | -3.27475800 | H              | 3.02066300  | 7.37054200  | -1.18902800 |
| O            | 4.36037900  | 4.72806500  | -3.50484100 | H              | 4.28980600  | 6.19769200  | -0.81677400 |
| C            | 5.57770700  | 4.30749900  | -2.88971600 | H              | 4.19036900  | 6.90041300  | -2.43817900 |
| Pd           | 5.50933100  | 2.44984200  | -2.10033600 | C              | 4.37576400  | 0.00465000  | -0.80083200 |
| C            | 3.85896100  | 6.35077600  | -1.12500900 | O              | 3.94639300  | -0.08916300 | 0.38107600  |
| H            | 3.36825500  | 7.13067900  | -0.53511100 | O              | 3.46084400  | -0.14219100 | -1.78390500 |
| H            | 4.52957400  | 5.78652900  | -0.46772000 | C              | 2.52088200  | 2.66491400  | -4.69811200 |
| H            | 4.46540600  | 6.82943200  | -1.89924800 | H              | 3.07449300  | 3.21901000  | -5.46041900 |
| C            | 4.26527800  | 0.05559900  | -0.78842200 | H              | 3.17005700  | 1.84844900  | -4.36626900 |
| O            | 3.76344600  | -0.12557600 | 0.35461500  | H              | 1.63532900  | 2.21796200  | -5.15992200 |
| O            | 3.41540900  | 0.03119300  | -1.82118600 | C              | 5.57622800  | 0.53961800  | -4.18346800 |
| C            | 2.56535600  | 2.90678300  | -4.62039500 | H              | 5.91670300  | 1.01813900  | -5.11808100 |
| H            | 3.13436600  | 3.49696000  | -5.34339000 | H              | 5.59916200  | 1.93309700  | -3.49723200 |
| H            | 3.18494300  | 2.04235100  | -4.35297100 | H              | 6.37681700  | 0.14777800  | -3.54078900 |
| H            | 1.66211700  | 2.52695300  | -5.10692800 | O              | 4.41752900  | 0.04068000  | -4.13582000 |
| C            | 5.65183900  | 0.59419700  | -4.19504800 | H              | 3.90216100  | -0.13351200 | -2.70907700 |
| H            | 6.02254700  | 0.97545700  | -5.16436500 | K              | 2.23973200  | 1.95852000  | -0.47161800 |
| H            | 5.92932000  | 1.85514500  | -3.58715500 | I              | 5.29588000  | 3.65956600  | 0.65248200  |
| H            | 6.42516200  | 0.03446600  | -3.63738600 | H              | 6.26404300  | 4.36265600  | -3.67055600 |
| O            | 4.43374500  | 0.21739900  | -4.12154200 | H              | 5.62534600  | 5.05680000  | -2.14706100 |
| H            | 3.89355500  | 0.06687100  | -2.74011400 | O              | 5.58250100  | 0.30167200  | -1.12314700 |
| K            | 2.39853700  | 2.23958700  | 0.02079700  | K              | 6.32915500  | 0.45741700  | 1.38145200  |
| H            | 6.32838500  | 4.38775100  | -3.67764700 |                |             |             |             |

**36-TS-b**

|    |            |             |             |
|----|------------|-------------|-------------|
| C  | 4.21178800 | 4.86194000  | -4.47649000 |
| C  | 3.16378400 | 5.42569100  | -3.71524000 |
| C  | 1.85917400 | 5.33539300  | -4.22842600 |
| C  | 1.58977500 | 4.71871300  | -5.45294900 |
| C  | 2.64446400 | 4.17753000  | -6.19624800 |
| C  | 3.96005900 | 4.24050200  | -5.72147800 |
| H  | 1.04646500 | 5.77252300  | -3.65345400 |
| H  | 0.57252400 | 4.67660300  | -5.83228900 |
| H  | 2.44976700 | 3.70173900  | -7.15440600 |
| O  | 5.52835100 | 4.93369200  | -4.12494800 |
| C  | 6.01056400 | 4.44899800  | -2.86023300 |
| Pd | 5.48907800 | 2.60974700  | -2.19638700 |
| C  | 3.41236200 | 6.11454700  | -2.39810900 |
| H  | 2.53389700 | 6.69273600  | -2.09809200 |
| H  | 3.63008300 | 5.38599600  | -1.61035400 |
| H  | 4.26484000 | 6.79720700  | -2.47101200 |
| C  | 4.21702400 | -0.00524700 | -0.80661900 |
| O  | 3.84897800 | -0.20917000 | 0.37594300  |
| O  | 3.34812200 | -0.38769500 | -1.79112200 |
| C  | 5.11462200 | 3.66565000  | -6.50110600 |
| H  | 5.73309400 | 3.03396300  | -5.85850700 |
| H  | 4.76184500 | 3.07874500  | -7.35394800 |
| H  | 5.76827500 | 4.46199300  | -6.87414900 |
| C  | 5.58485300 | 0.49483900  | -4.21381500 |
| H  | 6.05264000 | 0.84033700  | -5.14813300 |
| H  | 6.04496200 | 1.99156800  | -3.59167300 |
| H  | 6.25287000 | 0.00032700  | -3.49795700 |
| O  | 4.34419700 | 0.26925100  | -4.18709700 |
| H  | 3.80095200 | -0.25772800 | -2.67221500 |
| K  | 2.60045900 | 2.19415400  | -3.40359700 |
| H  | 7.09705400 | 4.45489500  | -2.97921700 |
| H  | 5.71311400 | 5.10619300  | -2.04071400 |
| O  | 5.31162700 | 0.54200800  | -1.16181300 |
| C  | 3.44107100 | 3.08937100  | -0.05404100 |
| O  | 4.64812400 | 3.48907400  | -0.43092700 |
| O  | 2.53779900 | 2.81720200  | -0.93296800 |
| K  | 5.63953500 | 1.75921600  | 1.30703700  |
| K  | 1.55427400 | 0.99635100  | 0.67615200  |
| O  | 3.23567600 | 2.92196200  | 1.20264700  |

**36-TS-c**

|   |            |            |             |
|---|------------|------------|-------------|
| C | 5.34416800 | 4.25500100 | -5.40866400 |
| C | 4.09147300 | 4.69643300 | -5.87867600 |
| C | 3.60890700 | 4.13329000 | -7.07253100 |
| C | 4.34567200 | 3.17734600 | -7.77501800 |
| C | 5.60993200 | 2.80104700 | -7.31366800 |
| C | 6.13526800 | 3.34721700 | -6.13799900 |

|    |            |             |             |
|----|------------|-------------|-------------|
| H  | 2.65070400 | 4.47255100  | -7.46062700 |
| H  | 3.95267000 | 2.75505300  | -8.69568700 |
| H  | 6.20356700 | 2.08595900  | -7.87741800 |
| O  | 5.89789400 | 4.76465800  | -4.25838600 |
| C  | 5.27875800 | 4.44724200  | -3.02188800 |
| Pd | 5.52164800 | 2.62040600  | -2.14943200 |
| C  | 3.28921600 | 5.75465600  | -5.15703000 |
| H  | 2.71874600 | 6.35030000  | -5.87677200 |
| H  | 2.58036900 | 5.30318400  | -4.45225200 |
| H  | 3.94918700 | 6.42693300  | -4.60152400 |
| C  | 4.30500000 | -0.07962100 | -0.90472500 |
| O  | 3.81191800 | -0.21666200 | 0.24943000  |
| O  | 3.51333600 | -0.47973800 | -1.92645300 |
| C  | 7.52900000 | 3.02730900  | -5.65906100 |
| H  | 7.53072800 | 2.76902200  | -4.59661700 |
| H  | 7.96455400 | 2.20459800  | -6.23358300 |
| H  | 8.18009600 | 3.90176300  | -5.77062100 |
| C  | 5.59966700 | 0.46365900  | -4.25900300 |
| H  | 6.06666900 | 0.87292300  | -5.16381300 |
| H  | 5.54822000 | 1.97382100  | -3.65216200 |
| H  | 6.28387500 | 0.11581400  | -3.47536300 |
| O  | 4.42680800 | -0.00390600 | -4.32638800 |
| H  | 3.94174000 | -0.33863400 | -2.82465400 |
| K  | 2.35629900 | 5.05995000  | -0.81072700 |
| H  | 5.68012700 | 5.16956600  | -2.30983500 |
| H  | 4.18566300 | 4.48382900  | -3.09678100 |
| O  | 5.46302200 | 0.39949500  | -1.16217800 |
| C  | 1.20215200 | 2.78903600  | -2.26492500 |
| O  | 1.81141400 | 3.72411600  | -2.95012200 |
| O  | 1.01255500 | 2.94392200  | -0.98441200 |
| K  | 5.93277600 | 0.69707400  | 1.43140100  |
| I  | 5.49646600 | 3.93089300  | 0.49055500  |
| K  | 1.23015800 | 0.38130100  | -0.63136800 |
| O  | 0.84575600 | 1.68678500  | -2.84227400 |
| K  | 2.50086600 | 1.90408000  | -4.77246500 |

**36-TS-d**

|   |             |            |             |
|---|-------------|------------|-------------|
| C | 2.99397000  | 4.45860700 | -3.29668400 |
| C | 2.62969500  | 5.42959400 | -2.34180000 |
| C | 1.32965900  | 5.37953700 | -1.81436900 |
| C | 0.40143600  | 4.43191400 | -2.25230900 |
| C | 0.76891600  | 3.51532700 | -3.24479700 |
| C | 2.06517100  | 3.51093200 | -3.78121000 |
| H | 1.03608700  | 6.12573100 | -1.08049100 |
| H | -0.61286200 | 4.43920900 | -1.86146800 |
| H | 0.03783300  | 2.80918000 | -3.63225300 |
| O | 4.23260100  | 4.44846400 | -3.89682200 |
| C | 5.40903600  | 4.24048600 | -3.12434600 |

|              |            |             |             |                |             |             |             |
|--------------|------------|-------------|-------------|----------------|-------------|-------------|-------------|
| Pd           | 5.41696400 | 2.48163500  | -2.09287000 | H              | 5.08443400  | 1.44969500  | -6.69240300 |
| C            | 3.56477600 | 6.54169300  | -1.93768200 | H              | 5.45806000  | 3.17937500  | -6.87166100 |
| H            | 2.99591600 | 7.40726500  | -1.58688600 | H              | 5.92726600  | 2.33515500  | -5.40429500 |
| H            | 4.23266600 | 6.23255500  | -1.12705800 | H              | 6.38648100  | 3.01529600  | -2.96185600 |
| H            | 4.18178800 | 6.85614100  | -2.78403900 | H              | 5.49884100  | 0.62729000  | -3.69654400 |
| C            | 4.23784500 | 0.06737900  | -0.80090700 | K              | 2.23566300  | 0.11858900  | -2.94941600 |
| O            | 3.72573700 | 0.03943100  | 0.34457200  | H              | 6.57506500  | 4.84199800  | -3.31080500 |
| O            | 3.37894600 | -0.11202100 | -1.83340800 | H              | 5.11042600  | 5.00214300  | -2.34088900 |
| C            | 2.45920000 | 2.53252100  | -4.85656700 | O              | 5.96734700  | -1.11197800 | -2.25910100 |
| H            | 3.03850200 | 3.02845100  | -5.63962600 | C              | 3.87988900  | 0.62485300  | -0.10372200 |
| H            | 3.08207500 | 1.72133900  | -4.46606000 | O              | 3.85798100  | 1.15108700  | -1.30742700 |
| H            | 1.57240500 | 2.07990300  | -5.30951100 | O              | 3.08127600  | -0.37000300 | 0.13134300  |
| C            | 5.50141700 | 0.48618700  | -4.35387500 | K              | 6.97779400  | 0.47244100  | -0.41335800 |
| H            | 5.71146600 | 1.04662500  | -5.28166400 | I              | 6.53384500  | -2.37511300 | 2.21232700  |
| H            | 5.61590800 | 1.81325900  | -3.56486000 | K              | 4.46327700  | -2.72291100 | -0.60916800 |
| H            | 6.40195200 | 0.06321300  | -3.87157600 | O              | 4.69936300  | 1.07046900  | 0.77549300  |
| O            | 4.38053400 | -0.05856000 | -4.19302200 | K              | 3.82568500  | -0.27645200 | 2.74260900  |
| H            | 3.85924900 | -0.16523200 | -2.72390900 |                |             |             |             |
| K            | 2.02455500 | 1.99586000  | -0.64599400 | <b>37-TS-a</b> |             |             |             |
| H            | 6.22620600 | 4.24327800  | -3.84697900 | C              | 3.27820600  | 3.99789600  | -3.64317000 |
| H            | 5.55612800 | 5.01680500  | -2.37287500 | C              | 2.77934200  | 4.46496900  | -2.40528300 |
| O            | 5.46433800 | 0.33234100  | -1.06917500 | C              | 1.48283000  | 4.08642500  | -2.02968000 |
| K            | 8.02237700 | 0.82807700  | -1.17326900 | C              | 0.68351800  | 3.28627900  | -2.85008300 |
| I            | 8.93980800 | -0.28879900 | 1.84930400  | C              | 1.18763600  | 2.85259600  | -4.07760800 |
| K            | 5.63426700 | 0.46981900  | 2.09236700  | C              | 2.48254600  | 3.19740400  | -4.49168300 |
| I            | 5.15280400 | 3.68518600  | 0.43454600  | H              | 1.09124900  | 4.44914200  | -1.08244900 |
|              |            |             |             | H              | -0.32923400 | 3.03119700  | -2.54917900 |
|              |            |             |             | H              | 0.56992200  | 2.24905500  | -4.73888100 |
| <b>37-TS</b> |            |             |             | O              | 4.49219600  | 4.39967900  | -4.15494100 |
| C            | 3.75407000 | 3.80271300  | -4.59478400 | C              | 5.72784800  | 4.23670500  | -3.46377400 |
| C            | 2.54119200 | 4.17343000  | -3.98493100 | Pd             | 6.02431500  | 2.25605000  | -2.63088900 |
| C            | 1.38287700 | 3.46598700  | -4.33516900 | C              | 3.58130200  | 5.34935100  | -1.48527100 |
| C            | 1.42470000 | 2.43062100  | -5.27405900 | H              | 2.91928400  | 5.86751000  | -0.78493600 |
| C            | 2.64328400 | 2.07924800  | -5.86525100 | H              | 4.27986200  | 4.73419900  | -0.90641900 |
| C            | 3.82221800 | 2.75629200  | -5.53342800 | H              | 4.14098900  | 6.10678500  | -2.04167100 |
| H            | 0.43473900 | 3.75578600  | -3.88787100 | C              | 6.40181500  | -0.54906200 | -1.04516700 |
| H            | 0.50820500 | 1.92306000  | -5.56734000 | O              | 6.76718600  | -1.04889200 | 0.05009600  |
| H            | 2.68489600 | 1.27401800  | -6.59433400 | O              | 5.26751600  | -1.08844700 | -1.59063800 |
| O            | 4.91421500 | 4.52338200  | -4.38491100 | C              | 2.99219200  | 2.69972700  | -5.82223900 |
| C            | 5.59165600 | 4.40485000  | -3.12951200 | H              | 2.21219700  | 2.77343400  | -6.58685400 |
| Pd           | 5.12213600 | 2.60552700  | -2.15578200 | H              | 3.86237100  | 3.26588500  | -6.15406100 |
| C            | 2.48647100 | 5.30789000  | -2.99395700 | H              | 3.27766900  | 1.64508400  | -5.74067900 |
| H            | 1.47222400 | 5.70863600  | -2.91146000 | C              | 5.53523300  | 0.84750100  | -4.24601400 |
| H            | 2.79655700 | 4.97321600  | -1.99659900 | H              | 5.34163500  | 1.51570400  | -5.09362400 |
| H            | 3.15888600 | 6.11756600  | -3.29150400 | H              | 6.68206500  | 3.07289700  | -3.79850300 |
| C            | 4.99064300 | -1.11165100 | -3.05547100 | H              | 6.51613700  | 0.35186300  | -4.25784800 |
| O            | 4.02620600 | -1.92241500 | -3.09158600 | O              | 4.53680100  | 0.24231500  | -3.70381000 |
| O            | 4.90605500 | -0.09230200 | -3.98631800 | H              | 5.07198700  | -0.64656900 | -2.47517900 |
| C            | 5.14375500 | 2.40392300  | -6.16388600 |                |             |             |             |

|                |             |             |             |                |             |            |             |
|----------------|-------------|-------------|-------------|----------------|-------------|------------|-------------|
| K              | 2.80260600  | 0.88645600  | -1.72506600 | H              | -0.50627500 | 5.00532000 | -1.52311100 |
| H              | 6.42765900  | 4.81666800  | -4.06760100 | H              | -0.02453500 | 3.22745900 | -3.20445600 |
| H              | 5.72867700  | 4.67073900  | -2.46283500 | O              | 4.12033000  | 4.81959500 | -3.99288900 |
| O              | 6.97857400  | 0.41338700  | -1.63733100 | C              | 5.36052000  | 4.42070100 | -3.40479100 |
| C              | 4.66332700  | 1.98640400  | 0.46041000  | Pd             | 5.22665300  | 3.21205600 | -1.70261300 |
| O              | 4.62962200  | 2.37839500  | -0.77053700 | C              | 3.80331300  | 6.80887500 | -1.84101700 |
| O              | 3.75430100  | 1.12801300  | 0.88044400  | H              | 3.36017100  | 7.74326600 | -1.48453600 |
| K              | 7.80256100  | 1.19367100  | 1.02146700  | H              | 4.37504600  | 6.37718200 | -1.00882700 |
| I              | 6.16092100  | -0.36788800 | 4.38780800  | H              | 4.48304900  | 7.03986200 | -2.66469300 |
| K              | 4.62977300  | -1.43053900 | 1.40362500  | C              | 2.30751700  | 2.84208700 | -4.60850800 |
| O              | 5.55030900  | 2.43588700  | 1.27894900  | H              | 2.53713200  | 3.30361600 | -5.57428400 |
| K              | 4.10956900  | 2.16261300  | 3.36128400  | H              | 3.19382600  | 2.27045600 | -4.31312000 |
|                |             |             |             | H              | 1.47019400  | 2.15115400 | -4.74226900 |
|                |             |             |             | H              | 5.35824300  | 2.80810000 | -3.19381800 |
| <b>37-TS-b</b> |             |             |             | H              | 6.02022900  | 4.24382300 | -4.25607200 |
| C              | 2.96156200  | 4.80356300  | -3.17903200 | H              | 5.80271500  | 5.22901300 | -2.80327200 |
| C              | 2.76160900  | 5.82450900  | -2.22811800 | K              | 2.46411500  | 3.26067300 | 0.11439400  |
| C              | 1.56440000  | 5.81967800  | -1.49448600 | C              | 5.18347900  | 4.03724000 | 1.09297900  |
| C              | 0.58726900  | 4.84129300  | -1.70403900 | O              | 5.04022100  | 2.83623000 | 0.38898700  |
| C              | 0.80017300  | 3.84464800  | -2.66559500 | O              | 4.20517100  | 4.84218800 | 1.04809300  |
| C              | 1.98588900  | 3.81112000  | -3.41272500 | O              | 6.26769700  | 4.19782500 | 1.72250200  |
| H              | 1.39175900  | 6.61007300  | -0.76826200 | K              | 7.49824400  | 2.27383600 | 0.71291700  |
| H              | -0.34643000 | 4.87500100  | -1.14915300 |                |             |            |             |
| H              | 0.03249700  | 3.09779800  | -2.85489100 |                |             |            |             |
| O              | 4.06573200  | 4.76703700  | -3.98515700 | <b>37-TS-d</b> |             |            |             |
| C              | 5.35971100  | 4.47159800  | -3.42984400 | C              | 3.80982500  | 6.18376400 | -2.69473300 |
| Pd             | 5.57931200  | 3.53942100  | -1.54314000 | C              | 4.35845100  | 7.48546100 | -2.72428500 |
| C              | 3.79637100  | 6.89952300  | -2.01881900 | C              | 3.87458300  | 8.43729800 | -1.81559200 |
| H              | 3.35407100  | 7.78358200  | -1.55192600 | C              | 2.85541100  | 8.11471800 | -0.91304300 |
| H              | 4.60484100  | 6.54289400  | -1.37037900 | C              | 2.31312700  | 6.82753000 | -0.91612800 |
| H              | 4.24471900  | 7.19329900  | -2.97205600 | C              | 2.77904900  | 5.83850600 | -1.79728500 |
| C              | 2.24494100  | 2.75407300  | -4.45587200 | H              | 4.27729800  | 9.44727400 | -1.84274800 |
| H              | 2.38724100  | 3.20821000  | -5.44124900 | H              | 2.47193500  | 8.86900700 | -0.23095100 |
| H              | 3.16526900  | 2.20396600  | -4.23298900 | H              | 1.51534800  | 6.57168300 | -0.22317700 |
| H              | 1.41511700  | 2.04431600  | -4.51534700 | O              | 4.22769700  | 5.26084200 | -3.62623300 |
| H              | 5.14666500  | 2.91872800  | -2.89777500 | C              | 5.48804600  | 4.61043200 | -3.40015600 |
| I              | 5.90092200  | 3.24156800  | 1.17468100  | Pd             | 5.58489300  | 3.57384800 | -1.55955100 |
| H              | 5.94958200  | 4.11387200  | -4.27454400 | C              | 5.41162600  | 7.85614300 | -3.74193500 |
| H              | 5.83233400  | 5.38710500  | -3.04447400 | H              | 5.37563900  | 8.92643500 | -3.96496200 |
| K              | 2.79470500  | 2.86172000  | -0.16571800 | H              | 6.42440400  | 7.62874300 | -3.38746000 |
|                |             |             |             | H              | 5.26228300  | 7.29661600 | -4.66850000 |
|                |             |             |             | C              | 2.20702300  | 4.44559800 | -1.73845000 |
| <b>37-TS-c</b> |             |             |             | H              | 2.50565900  | 3.85833000 | -2.60667600 |
| C              | 2.96878900  | 4.84657900  | -3.23709600 | H              | 2.57701300  | 3.94590700 | -0.83526400 |
| C              | 2.73253600  | 5.83847000  | -2.26625800 | H              | 1.11281100  | 4.48190900 | -1.68662600 |
| C              | 1.46672700  | 5.87012300  | -1.65737800 | H              | 5.35846100  | 3.05272300 | -2.99367700 |
| C              | 0.47449200  | 4.94355900  | -1.98791400 | H              | 5.76394200  | 4.21456500 | -4.37856800 |
| C              | 0.74304500  | 3.95012000  | -2.93769400 | H              | 6.26657000  | 5.33266900 | -3.11724800 |
| C              | 1.98856200  | 3.89037900  | -3.57382200 | K              | 5.23025900  | 6.19545800 | 0.66131700  |
| H              | 1.26513600  | 6.64159700  | -0.91838100 |                |             |            |             |



|   |            |            |            |    |            |            |             |
|---|------------|------------|------------|----|------------|------------|-------------|
| C | 4.74524000 | 3.29578200 | 1.39334600 | H  | 1.90286200 | 1.05958200 | -5.20242500 |
| O | 5.77368800 | 3.48612500 | 0.56309100 | H  | 2.83415500 | 0.21792500 | -7.34759500 |
| O | 3.75316400 | 4.11087600 | 1.36658200 | H  | 4.79708200 | 1.35798600 | -8.37442200 |
| I | 6.55697400 | 5.60246900 | 4.04588400 | O  | 4.94875500 | 4.47013400 | -5.11260900 |
| K | 7.45388600 | 2.54624600 | 2.26277600 | C  | 5.70428200 | 4.46099800 | -3.89219500 |
| O | 4.85295000 | 2.36574400 | 2.27302200 | Pd | 6.48647200 | 2.66156200 | -3.15116200 |
| K | 3.45230900 | 3.77868200 | 3.92833900 | C  | 2.75980300 | 3.14074700 | -3.68485100 |

### 37-TS-e

|    |             |            |             |   |            |             |             |
|----|-------------|------------|-------------|---|------------|-------------|-------------|
| C  | 3.24352200  | 4.24123600 | -4.25008900 | H | 1.70805900 | 2.85715200  | -3.58123900 |
| C  | 2.78727000  | 5.26576800 | -3.39656800 | H | 3.31744100 | 2.67446200  | -2.86304500 |
| C  | 1.48287700  | 5.16170800 | -2.88529500 | H | 2.83778200 | 4.22664500  | -3.58892800 |
| C  | 0.66352600  | 4.07654800 | -3.20719800 | C | 6.14389300 | 3.55844200  | -7.42152100 |
| C  | 1.13960500  | 3.07581900 | -4.06145500 | H | 6.47518100 | 3.07328500  | -8.34392300 |
| C  | 2.43058700  | 3.14494000 | -4.60130100 | H | 5.89445500 | 4.60070200  | -7.64397600 |
| H  | 1.10923300  | 5.95164500 | -2.23801500 | H | 6.98098400 | 3.58090100  | -6.71569800 |
| H  | -0.34683100 | 4.02070700 | -2.81114200 | C | 8.11658200 | 1.80892100  | -0.03413600 |
| H  | 0.50078700  | 2.23683300 | -4.32531300 | H | 8.23060300 | 2.73435600  | -0.62740700 |
| O  | 4.48401500  | 4.32832000 | -4.84171900 | H | 7.02768600 | 3.61508000  | -4.24639500 |
| C  | 5.61991100  | 4.06373800 | -4.01932000 | K | 8.17389800 | -1.24254200 | -1.04534300 |
| Pd | 5.86897400  | 2.12708300 | -3.16401400 | H | 6.29356600 | 5.37913700  | -3.92685200 |
| C  | 3.66971800  | 6.43113400 | -3.02084000 | H | 5.03553100 | 4.52693100  | -3.01915000 |
| H  | 3.06504600  | 7.31611500 | -2.80112400 | C | 5.62396200 | 0.29861500  | -1.48144100 |
| H  | 4.26077100  | 6.19304000 | -2.12702800 | O | 6.73111800 | 0.85778300  | -1.97334800 |
| H  | 4.35993100  | 6.67219000 | -3.83345500 | O | 5.73410100 | -0.37608600 | -0.39528900 |
| C  | 2.95618700  | 2.09786500 | -5.54887600 | I | 6.10878900 | -3.30886000 | -3.23637500 |
| H  | 3.24958000  | 2.55158300 | -6.50096900 | K | 3.70644500 | -1.84495200 | -1.03851800 |
| H  | 3.85165700  | 1.61826800 | -5.13981300 | O | 4.52322200 | 0.38710300  | -2.13896200 |
| H  | 2.20317200  | 1.32922300 | -5.74319400 | K | 5.56487500 | -0.02416400 | -4.59137800 |
| H  | 6.17118000  | 2.57586400 | -4.61168800 |   |            |             |             |

### 38-TS-a

|   |            |            |             |    |             |             |             |
|---|------------|------------|-------------|----|-------------|-------------|-------------|
| I | 5.88734800 | 0.24429800 | -1.11731600 | Pd | 3.01290800  | -0.69484600 | -2.00563000 |
| H | 6.46063400 | 4.53458700 | -4.53104400 | C  | 3.20995900  | 2.52709400  | -3.44126300 |
| H | 5.49762400 | 4.51257800 | -3.02648800 | C  | 1.90425600  | 2.18897400  | -3.85023800 |
| K | 3.13547400 | 2.98825300 | -1.02372900 | C  | 0.85310000  | 3.03118400  | -3.45605400 |
| C | 5.43839300 | 3.93832300 | 0.54033100  | C  | 1.08618500  | 4.20219200  | -2.73090000 |
| O | 6.62618800 | 3.81446000 | 1.06641300  | C  | 2.40066600  | 4.54947900  | -2.39045100 |
| O | 4.40542200 | 3.44737400 | 1.15961100  | C  | 3.47498800  | 3.72113400  | -2.73335900 |
| K | 5.88125900 | 1.72768100 | 2.31652200  | H  | -0.15811300 | 2.78280600  | -3.76958100 |
| O | 5.30269800 | 4.46908800 | -0.64101700 | H  | 0.26094600  | 4.86680800  | -2.48542700 |
| K | 7.78402000 | 3.91116800 | -1.19134000 | H  | 2.60142500  | 5.48292600  | -1.86850600 |
|   |            |            |             | O  | 4.31695500  | 1.80415000  | -3.79053500 |
|   |            |            |             | C  | 4.45450400  | 0.40878200  | -3.48554800 |
|   |            |            |             | H  | 3.92717400  | -0.21218700 | -4.21006700 |
|   |            |            |             | H  | 5.51921700  | 0.19297000  | -3.62797700 |
|   |            |            |             | C  | 1.62693500  | 1.00244200  | -4.74257400 |
|   |            |            |             | H  | 2.41823200  | 0.86081800  | -5.48456000 |
|   |            |            |             | H  | 1.54957700  | 0.07668600  | -4.15854100 |

### 37-TS-f

|   |            |            |             |
|---|------------|------------|-------------|
| C | 4.41351700 | 3.30735600 | -5.60971200 |
| C | 3.31346800 | 2.66952200 | -5.00416100 |
| C | 2.76282900 | 1.55127500 | -5.65102000 |
| C | 3.28741800 | 1.07404900 | -6.85521500 |
| C | 4.38803300 | 1.71789500 | -7.43335200 |
| C | 4.96274300 | 2.83936600 | -6.82181700 |

|                |            |             |             |                |             |             |             |
|----------------|------------|-------------|-------------|----------------|-------------|-------------|-------------|
| H              | 0.68120000 | 1.14112200  | -5.27515600 | O              | 4.88172500  | 2.26554200  | 0.74087800  |
| C              | 4.89628100 | 4.07677700  | -2.38019200 | K              | 2.22112300  | 3.19957300  | 0.26810800  |
| H              | 5.34820400 | 3.30509100  | -1.75249400 | C              | 5.79343100  | -1.68128200 | 1.51367600  |
| H              | 5.50777100 | 4.15585000  | -3.28504800 | O              | 6.96554200  | -1.63607800 | 0.95448000  |
| H              | 4.93791600 | 5.02967300  | -1.84523800 | O              | 5.45904500  | -0.80159700 | 2.41534300  |
| H              | 4.70982400 | 0.41634300  | -2.14123400 | K              | 5.91027000  | -2.59358100 | -1.20556800 |
| C              | 4.16311900 | 1.37444200  | -0.38792700 | I              | 2.72505900  | -2.46705700 | -3.43434800 |
| O              | 2.97577000 | 0.89044200  | -0.75361400 | K              | 7.16167800  | 0.88346700  | 1.50418700  |
| O              | 5.21164000 | 0.83892400  | -0.97646700 | O              | 4.91310900  | -2.55483100 | 1.10878500  |
| O              | 4.20482900 | 2.28968800  | 0.45543700  | K              | 2.95890400  | -1.18375000 | 1.94031900  |
| K              | 1.51740900 | 2.65181700  | 0.19778400  | I              | 0.50971300  | -0.53497800 | -0.67230900 |
| K              | 5.40128500 | -1.81502400 | -0.38190100 |                |             |             |             |
| C              | 4.26339200 | -2.90108300 | -3.45606900 | <b>38-TS-c</b> |             |             |             |
| O              | 3.08637300 | -2.31710500 | -3.22490400 | Pd             | 2.98085400  | -0.72743800 | -1.94479500 |
| O              | 4.27234500 | -3.81921700 | -4.33793200 | C              | 2.67294500  | 1.90805900  | -3.90408700 |
| I              | 4.01366500 | -1.21475800 | -7.50636200 | C              | 1.63280600  | 1.25156300  | -4.59858200 |
| K              | 1.96057800 | -3.06653300 | -5.43731300 | C              | 0.33305500  | 1.77040900  | -4.50130800 |
| O              | 5.32161600 | -2.48003000 | -2.86088100 | C              | 0.06728500  | 2.92409400  | -3.75608300 |
| K              | 6.34300200 | -2.58111100 | -5.38057600 | C              | 1.11588100  | 3.56945900  | -3.09389000 |
| I              | 1.26802600 | -1.94586700 | -0.35012300 | C              | 2.42636100  | 3.07568400  | -3.15125400 |
|                |            |             |             | H              | -0.46861500 | 1.28427500  | -5.05305900 |
| <b>38-TS-b</b> |            |             |             | H              | -0.93856200 | 3.33594900  | -3.72493200 |
| Pd             | 2.98064000 | -0.31373800 | -1.81772400 | H              | 0.92369900  | 4.47842400  | -2.52750500 |
| C              | 4.01714700 | 2.86616000  | -3.10889600 | O              | 3.97741000  | 1.49988400  | -4.01846100 |
| C              | 2.67469600 | 2.89253600  | -3.54655900 | C              | 4.38914300  | 0.22345300  | -3.49920700 |
| C              | 1.87843800 | 3.98148900  | -3.15571100 | H              | 4.05583700  | -0.60009000 | -4.13041900 |
| C              | 2.39623600 | 5.03544000  | -2.39785500 | H              | 5.48223900  | 0.22561600  | -3.58336700 |
| C              | 3.74477300 | 5.01203600  | -2.01973100 | C              | 1.90939400  | 0.04542000  | -5.46031300 |
| C              | 4.57011600 | 3.93540300  | -2.36533300 | H              | 2.84059600  | 0.14607400  | -6.02358500 |
| H              | 0.84621600 | 4.01643700  | -3.49475200 | H              | 2.01399100  | -0.85230200 | -4.84025600 |
| H              | 1.77090700 | 5.89023900  | -2.15141000 | H              | 1.09662900  | -0.11984500 | -6.17384500 |
| H              | 4.17127900 | 5.84577500  | -1.46651000 | C              | 3.53513200  | 3.78042800  | -2.41099200 |
| O              | 4.91377400 | 1.89840500  | -3.46978900 | H              | 3.36428600  | 3.73645200  | -1.33064000 |
| C              | 4.67265200 | 0.49413900  | -3.28094900 | H              | 4.49900000  | 3.31437200  | -2.60986400 |
| H              | 3.95820000 | 0.11633900  | -4.00635000 | H              | 3.58626700  | 4.83522800  | -2.70335700 |
| H              | 5.62959300 | 0.01637800  | -3.52153600 | H              | 4.59967600  | 0.36692000  | -2.18375700 |
| C              | 2.10414400 | 1.85100200  | -4.47863500 | C              | 4.05267600  | 1.35262300  | -0.36109200 |
| H              | 2.83291600 | 1.57370000  | -5.24584900 | O              | 2.85332000  | 1.01943300  | -0.84671900 |
| H              | 1.81196500 | 0.93587900  | -3.95207000 | O              | 5.09019300  | 0.85763100  | -0.98397000 |
| H              | 1.21374800 | 2.23838100  | -4.98072600 | O              | 4.12387200  | 2.07482400  | 0.65785500  |
| C              | 6.03124700 | 3.91135800  | -1.99658400 | K              | 0.22251000  | 0.80227100  | -1.10890000 |
| H              | 6.29090800 | 2.96627600  | -1.51669200 | K              | 5.17548100  | -1.78627000 | 0.00795100  |
| H              | 6.65255700 | 3.99965300  | -2.89512600 | C              | 4.26818300  | -3.11986400 | -3.00208400 |
| H              | 6.27618400 | 4.73754500  | -1.32359200 | O              | 3.08246800  | -2.50813700 | -2.94298400 |
| H              | 4.90814400 | 0.39189700  | -1.93769100 | O              | 4.32599000  | -4.19177800 | -3.69045900 |
| C              | 4.63206500 | 1.38314700  | -0.12064400 | I              | 4.52315500  | -2.43112200 | -7.40057400 |
| O              | 3.36273700 | 1.05964200  | -0.33354900 | K              | 2.22999000  | -3.71059600 | -5.15284200 |
| O              | 5.54276600 | 0.78277200  | -0.83117200 | O              | 5.29566000  | -2.58763200 | -2.44695300 |

|              |             |             |             |                |             |             |             |
|--------------|-------------|-------------|-------------|----------------|-------------|-------------|-------------|
| K            | 6.54364300  | -3.18240900 | -4.72984800 | C              | -3.46513100 | 1.53914900  | -1.14330200 |
| C            | 1.75567900  | -1.09872000 | 0.60196600  | C              | -4.65211200 | 1.46855900  | -0.42273700 |
| O            | 2.87852500  | -1.34126700 | 1.16487500  | C              | -4.77132700 | 0.55405400  | 0.62608600  |
| O            | 1.54555700  | -1.47048900 | -0.67409200 | C              | -3.71262000 | -0.29378600 | 0.95156800  |
| O            | 0.80745200  | -0.45835400 | 1.17743600  | H              | -3.36499300 | 2.26543400  | -1.94529800 |
| K            | 2.62041500  | 0.96336400  | 2.44082900  | H              | -5.48097900 | 2.12375300  | -0.67402500 |
| <b>39</b>    |             |             |             | H              | -5.69577100 | 0.48943800  | 1.19444800  |
| Pd           | 1.45798400  | -0.16215700 | -0.48060900 | O              | -1.52000000 | -1.04677900 | 0.65404700  |
| C            | -2.58750400 | 0.26009600  | 0.05055300  | C              | -0.54365500 | -1.55474900 | -0.25281800 |
| C            | -2.96816900 | 1.16624200  | -0.95248100 | H              | -0.03273400 | -2.36010300 | 0.27864300  |
| C            | -4.34047400 | 1.33409600  | -1.18523400 | H              | -1.03243600 | -1.92460800 | -1.16342700 |
| C            | -5.29079600 | 0.62895200  | -0.44847500 | C              | -1.07143900 | 0.92334700  | -1.58940600 |
| C            | -4.88266800 | -0.26124000 | 0.54656600  | H              | -1.12984900 | 1.79973800  | -2.24316800 |
| C            | -3.52399500 | -0.45928400 | 0.81075100  | H              | -0.79492300 | 0.10355000  | -2.26572300 |
| H            | -4.66012800 | 2.03324800  | -1.95425600 | C              | -3.81162900 | -1.28729600 | 2.08366200  |
| H            | -6.34907000 | 0.77459100  | -0.64605600 | H              | -3.58771600 | -2.30264900 | 1.74080800  |
| H            | -5.62240300 | -0.81130900 | 1.12323100  | H              | -3.08800700 | -1.06994200 | 2.88009800  |
| O            | -1.24714200 | 0.10262800  | 0.36929700  | H              | -4.81184200 | -1.27856700 | 2.52543800  |
| C            | -0.46327700 | -0.74911000 | -0.51827600 | H              | -0.34395400 | 1.57346700  | -0.75729200 |
| H            | -0.52448000 | -1.78336800 | -0.16042500 | C              | 1.39458500  | 2.45180900  | 0.29940000  |
| H            | -0.85398800 | -0.65977400 | -1.53876500 | O              | 2.02290500  | 1.77249300  | -0.64075700 |
| C            | -1.93859000 | 1.92611700  | -1.75417000 | O              | 0.08805600  | 2.55460100  | 0.21815200  |
| H            | -2.33226900 | 2.89823600  | -2.06685400 | O              | 2.01401400  | 2.88847200  | 1.32086200  |
| H            | -1.67006700 | 1.37844500  | -2.66613900 | K              | -0.05988700 | 1.13366600  | 2.40636000  |
| C            | -3.04694100 | -1.39969900 | 1.89089500  | C              | 2.17152300  | -1.55252600 | 1.55834600  |
| H            | -2.30140300 | -2.10337000 | 1.50878600  | O              | 2.30281500  | -1.24543200 | 0.26909700  |
| H            | -2.56494500 | -0.85312400 | 2.71159000  | O              | 2.37958800  | -2.77010200 | 1.89912800  |
| H            | -3.87981600 | -1.97013900 | 2.31162700  | K              | 3.99297300  | 1.18050800  | 0.94614800  |
| H            | -1.00901300 | 2.07895000  | -1.20202000 | I              | 6.21310200  | -1.58464700 | 2.00247400  |
| C            | 2.51162000  | 2.01231800  | -0.01086200 | K              | 3.91127800  | -3.22208900 | -0.18661000 |
| O            | 3.32930200  | 1.05084000  | -0.37304500 | O              | 1.93728600  | -0.62604600 | 2.42249100  |
| O            | 1.31061200  | 1.96725400  | -0.57352500 | K              | 3.44919100  | -2.01145400 | 4.12929400  |
| O            | 2.77811300  | 2.81904700  | 0.92886500  | <b>40-TS-a</b> |             |             |             |
| K            | 0.35505000  | 1.55422000  | 1.93541000  | Pd             | 0.99545300  | -0.11240100 | -0.56889500 |
| C            | 1.92140300  | -1.85483000 | 1.84533000  | C              | -2.38141600 | -0.26901000 | 0.03202600  |
| O            | 1.92257000  | -1.93395500 | 0.52498800  | C              | -2.19730700 | 0.55906800  | -1.09576400 |
| O            | 2.06512600  | -2.96524900 | 2.47604300  | C              | -3.30638200 | 1.32014300  | -1.50625300 |
| K            | 4.55711500  | 0.92505300  | 1.83992600  | C              | -4.52700700 | 1.26420000  | -0.84296900 |
| I            | 5.94929000  | -2.04377700 | 3.18119900  | C              | -4.67182500 | 0.44011300  | 0.27522000  |
| K            | 3.84529300  | -3.66955500 | 0.66448400  | C              | -3.60313700 | -0.33288000 | 0.73011700  |
| O            | 1.86206800  | -0.71802100 | 2.46689900  | H              | -3.18985000 | 1.97630900  | -2.36465000 |
| K            | 2.77207600  | -1.97549600 | 4.68428000  | H              | -5.36408100 | 1.86060000  | -1.19361000 |
| <b>40-TS</b> |             |             |             | H              | -5.62370400 | 0.38754600  | 0.79713100  |
| Pd           | 0.78803000  | -0.09089700 | -0.64358000 | O              | -1.36843500 | -1.01667500 | 0.60971400  |
| C            | -2.52436300 | -0.21475100 | 0.19691900  | C              | -0.34680300 | -1.58321600 | -0.19157100 |
| C            | -2.36749500 | 0.70626100  | -0.86220000 | H              | 0.10175100  | -2.37979200 | 0.39848200  |
|              |             |             |             | H              | -0.75477000 | -1.96090000 | -1.13642400 |

|                |             |             |             |                |             |             |             |
|----------------|-------------|-------------|-------------|----------------|-------------|-------------|-------------|
| C              | -0.86312800 | 0.77214700  | -1.74679100 | K              | 3.88540600  | 1.37932000  | 1.34750900  |
| H              | -0.91332100 | 1.58829700  | -2.47650400 | I              | 2.66301100  | -1.79379700 | 0.55150900  |
| H              | -0.50273300 | -0.08973000 | -2.32290700 | O              | 1.64598200  | 2.79331900  | 1.51786100  |
| C              | -3.73098400 | -1.22978700 | 1.93757600  | K              | -0.97815900 | 2.35166500  | 2.21808700  |
| H              | -3.45940200 | -2.26232100 | 1.69569400  |                |             |             |             |
| H              | -3.05902200 | -0.92148400 | 2.74889900  |                |             |             |             |
| H              | -4.75273800 | -1.21856300 | 2.32599300  | <b>40-TS-c</b> |             |             |             |
| H              | -0.26199700 | 1.53529900  | -0.85985400 | Pd             | 0.80069200  | -0.08967300 | -0.67163300 |
| C              | 1.32563900  | 2.53286200  | 0.20719800  | C              | -2.54294500 | -0.17515300 | 0.15996500  |
| O              | 2.03685800  | 1.92432900  | -0.71589900 | C              | -2.38788600 | 0.67534500  | -0.95436300 |
| O              | 0.01264700  | 2.51635500  | 0.06666300  | C              | -3.50831100 | 1.43431200  | -1.33375100 |
| O              | 1.84963000  | 3.02755000  | 1.24604400  | C              | -4.71759700 | 1.35552600  | -0.65126100 |
| K              | -0.06020800 | 1.31112600  | 2.37703200  | C              | -4.83533000 | 0.51043600  | 0.45426900  |
| C              | 5.25321600  | 1.53198700  | -2.04075600 | C              | -3.75244100 | -0.26138000 | 0.87671900  |
| O              | 5.89416800  | 0.93627400  | -1.07691200 | H              | -3.40964300 | 2.10804300  | -2.18066000 |
| O              | 4.73593700  | 0.81665300  | -3.01454500 | H              | -5.56516600 | 1.95237200  | -0.97540700 |
| K              | 4.48417800  | 2.45043000  | 0.57247300  | H              | -5.77682300 | 0.44196500  | 0.99340700  |
| I              | 2.80913700  | -1.21080200 | 1.16560600  | O              | -1.51412200 | -0.92410000 | 0.70101600  |
| K              | 5.07218500  | -1.34626100 | -1.73018300 | C              | -0.53906800 | -1.51989100 | -0.15277700 |
| O              | 5.03790400  | 2.80689500  | -1.99044700 | H              | -0.04674300 | -2.26720500 | 0.47638200  |
| K              | 2.80390400  | 2.51304700  | -3.16709800 | H              | -1.03670700 | -1.97735100 | -1.02013600 |
|                |             |             |             | C              | -1.07200600 | 0.88791600  | -1.64415000 |
|                |             |             |             | H              | -1.11238100 | 1.74582400  | -2.32289300 |
| <b>40-TS-b</b> |             |             |             | H              | -0.77406700 | 0.04734200  | -2.28754200 |
| Pd             | 0.80291200  | -0.20813500 | -0.72203600 | C              | -3.84784100 | -1.17615800 | 2.07340000  |
| C              | -2.38743700 | -0.33985500 | 0.18476600  | H              | -3.56327500 | -2.20113400 | 1.81417700  |
| C              | -2.25622600 | 0.74371300  | -0.71961700 | H              | -3.16662600 | -0.86706700 | 2.87614600  |
| C              | -3.16429000 | 1.81344400  | -0.56318100 | H              | -4.86339900 | -1.18610700 | 2.47850500  |
| C              | -4.13420000 | 1.83340800  | 0.43512100  | H              | -0.37974800 | 1.54150900  | -0.78800000 |
| C              | -4.22840700 | 0.75431700  | 1.32489300  | C              | 1.34726600  | 2.47495100  | 0.23479800  |
| C              | -3.36692400 | -0.33840600 | 1.20890400  | O              | 1.97828600  | 1.80993400  | -0.71696400 |
| H              | -3.07521300 | 2.65743500  | -1.24179700 | O              | 0.03553600  | 2.51615200  | 0.19612400  |
| H              | -4.82192300 | 2.67096600  | 0.51243800  | O              | 1.97976500  | 2.95473700  | 1.22708100  |
| H              | -4.98961300 | 0.74792000  | 2.10124300  | K              | 0.01427700  | 1.16606600  | 2.47668800  |
| O              | -1.56457600 | -1.42556900 | 0.24501600  | C              | 2.13868200  | -1.46114700 | 1.52690700  |
| C              | -0.55840600 | -1.71232000 | -0.70767900 | O              | 2.40348900  | -1.15980200 | 0.20607200  |
| H              | -0.10929700 | -2.64649500 | -0.37860900 | O              | 2.02636100  | -2.68923100 | 1.81369600  |
| H              | -0.98361600 | -1.81392400 | -1.71298900 | K              | 3.82686500  | 1.10729200  | 0.97238300  |
| C              | -1.10061700 | 0.91758500  | -1.65317100 | K              | 2.36577300  | -3.59277500 | -0.51484900 |
| H              | -1.23936000 | 1.80820400  | -2.27669500 | O              | 2.04886800  | -0.48761900 | 2.34012900  |
| H              | -0.92329900 | 0.11117800  | -2.36291800 |                |             |             |             |
| C              | -3.44637400 | -1.51378700 | 2.15175900  | <b>40-TS-d</b> |             |             |             |
| H              | -3.65886700 | -2.43918600 | 1.60621900  | Pd             | 0.95865300  | -0.01454800 | -0.65019600 |
| H              | -2.49239400 | -1.68033500 | 2.66445500  | C              | -2.38459500 | -0.44313600 | -0.12724700 |
| H              | -4.22916000 | -1.36461100 | 2.90082200  | C              | -2.23568600 | 0.46254000  | -1.19973000 |
| H              | -0.26951500 | 1.64827700  | -0.91497400 | C              | -3.37755200 | 1.19912600  | -1.56438800 |
| C              | 1.28675600  | 2.39422000  | 0.35372900  | C              | -4.59447900 | 1.04793900  | -0.90997300 |
| O              | 2.06132400  | 1.67646300  | -0.40057600 | C              | -4.70449000 | 0.14722200  | 0.15195000  |
| O              | 0.06361800  | 2.64349600  | -0.06100500 | C              | -3.60395400 | -0.60657700 | 0.56043900  |

|           |             |             |             |              |             |             |             |
|-----------|-------------|-------------|-------------|--------------|-------------|-------------|-------------|
| H         | -3.28953900 | 1.91265000  | -2.37897300 | C            | 1.16179000  | 2.64904600  | 0.15476600  |
| H         | -5.45634900 | 1.62863900  | -1.22463800 | O            | 1.73008700  | 1.97778000  | -0.76326600 |
| H         | -5.65408200 | 0.01851400  | 0.66456200  | O            | -0.12984100 | 3.08576200  | -0.09046500 |
| O         | -1.33935400 | -1.17309700 | 0.41744300  | O            | 1.59401900  | 2.91464100  | 1.29781000  |
| C         | -0.26173200 | -1.61139000 | -0.38595200 | K            | -0.47007600 | 0.99758600  | 2.03377800  |
| H         | 0.24651500  | -2.39305900 | 0.17476400  | C            | 1.97567400  | -1.36652100 | 1.62316000  |
| H         | -0.61328200 | -1.97131900 | -1.35907500 | O            | 2.30601700  | -0.94039400 | 0.41754300  |
| C         | -0.91659800 | 0.77276400  | -1.84299400 | O            | 2.06596700  | -2.62033300 | 1.88820800  |
| H         | -1.01353200 | 1.61492500  | -2.53717400 | K            | 3.68386000  | 1.26006200  | 1.13128900  |
| H         | -0.51468100 | -0.04157400 | -2.45696500 | I            | 5.89829300  | -1.44741400 | 2.40469000  |
| C         | -3.69579800 | -1.58813800 | 1.70396000  | K            | 3.76637700  | -3.02960000 | -0.04573900 |
| H         | -3.38906500 | -2.59120400 | 1.39078200  | O            | 1.64645300  | -0.50417700 | 2.53339500  |
| H         | -3.03282000 | -1.31518000 | 2.53501800  | K            | 2.93556300  | -2.02595600 | 4.26004800  |
| H         | -4.71631000 | -1.64026600 | 2.09191800  |              |             |             |             |
| H         | -0.34270300 | 1.56811100  | -0.95541500 | <b>42-TS</b> |             |             |             |
| C         | 1.15009500  | 2.61553900  | 0.22189500  | C            | -0.65631600 | 0.76472400  | 0.59184500  |
| O         | 1.96823600  | 2.06613700  | -0.65025900 | C            | -0.33908200 | 1.30597600  | -0.65700900 |
| O         | -0.13965500 | 2.54708900  | -0.01963600 | C            | -0.52623000 | 2.67686900  | -0.85609800 |
| O         | 1.56531900  | 3.09306900  | 1.31960800  | C            | -1.03308400 | 3.46357300  | 0.18649100  |
| K         | -0.39171700 | 1.23205900  | 2.22565100  | C            | -1.28267400 | 2.89436700  | 1.44539100  |
| K         | 4.13821500  | 2.60294400  | 1.16403300  | C            | -1.07568500 | 1.52924800  | 1.68740500  |
| I         | 2.93070800  | -1.03713200 | 0.89710600  | H            | -0.29908000 | 3.11925900  | -1.82209000 |
| K         | 3.51552000  | 1.28600300  | -2.52507000 | H            | -1.25199900 | 4.51522800  | 0.01567600  |
| I         | 6.33352900  | 2.76364100  | -1.46692600 | H            | -1.66401800 | 3.51468100  | 2.25353000  |
|           |             |             |             | O            | -0.52234000 | -0.59691600 | 0.69310500  |
| <b>41</b> |             |             |             | C            | -0.43852200 | -1.17194600 | -0.61587500 |
| Pd        | 0.62884800  | -0.14338000 | -0.82063100 | H            | -0.18917100 | -2.24011100 | -0.47916400 |
| C         | -2.45207400 | -0.49792600 | 0.10311100  | H            | -1.41553500 | -1.12944300 | -1.10478700 |
| C         | -2.21774800 | 0.49143500  | -0.88683700 | C            | 0.20605500  | 0.32903700  | -1.66076300 |
| C         | -3.06097100 | 1.62054800  | -0.86187400 | H            | 1.22102000  | 0.65980000  | -1.96970900 |
| C         | -4.08882600 | 1.76454300  | 0.06411200  | H            | -0.40718200 | 0.23028100  | -2.55724500 |
| C         | -4.31326000 | 0.75619800  | 1.00766300  | C            | -1.27127500 | 0.89266700  | 3.03821900  |
| C         | -3.50575700 | -0.38255000 | 1.03951500  | H            | -1.83033700 | -0.04495000 | 2.95256300  |
| H         | -2.89265400 | 2.40049000  | -1.60088800 | H            | -0.29897700 | 0.66075600  | 3.49254600  |
| H         | -4.71958100 | 2.64855500  | 0.04681000  | H            | -1.81226200 | 1.55988400  | 3.71488900  |
| H         | -5.12396900 | 0.84990500  | 1.72633100  | Pd           | 1.59883800  | -1.36796000 | -1.34996100 |
| O         | -1.62810200 | -1.56206800 | 0.32693000  | C            | 2.54415300  | 1.16052700  | 2.94173300  |
| C         | -0.48358400 | -1.81128200 | -0.50879700 | O            | 2.83441700  | 2.35718100  | 3.24266500  |
| H         | 0.11388800  | -2.52713900 | 0.06157400  | O            | 2.65499500  | 0.80598700  | 1.60061000  |
| H         | -0.81752600 | -2.25621900 | -1.45335400 | O            | 2.15696800  | 0.24070500  | 3.69595900  |
| C         | -1.07504300 | 0.40454500  | -1.84556900 | K            | 1.86677000  | -1.68937000 | 1.95195400  |
| H         | -0.92728300 | 1.36065100  | -2.36638800 | C            | 4.62401800  | 3.14968900  | 0.77707700  |
| H         | -1.23294800 | -0.35521000 | -2.61791100 | O            | 5.64456600  | 2.39243200  | 1.01131600  |
| C         | -3.70441500 | -1.47133300 | 2.06604500  | O            | 3.61865000  | 2.65257500  | 0.05871600  |
| H         | -3.88212500 | -2.43909800 | 1.58522200  | K            | 5.34662500  | 3.13768400  | 3.48214000  |
| H         | -2.81185700 | -1.60985600 | 2.68947200  | I            | 3.89325300  | -2.84021300 | -1.04429500 |
| H         | -4.55203500 | -1.24498500 | 2.71934000  | K            | 4.94429800  | 0.52304900  | -0.66600600 |
| H         | -0.36567500 | 2.76806800  | -0.97476500 | O            | 4.51041600  | 4.31797900  | 1.29507600  |

|                |             |             |             |                |             |             |             |
|----------------|-------------|-------------|-------------|----------------|-------------|-------------|-------------|
| K              | 1.89442400  | 4.07412600  | 1.35261200  | H              | -2.55354400 | -0.82181300 | 3.22632100  |
| H              | 3.01558900  | 1.56507400  | 1.02325300  | H              | -4.23896600 | -0.31739800 | 3.07021900  |
|                |             |             |             | H              | -0.84929900 | 2.34402200  | 1.34880400  |
| <b>42-TS-a</b> |             |             |             | C              | 1.05678000  | 2.24911800  | 1.15322900  |
| C              | 2.85802600  | 0.51563000  | 0.00631200  | O              | 0.96467400  | 2.92707700  | 0.10637800  |
| C              | 3.07183400  | -0.77613400 | -0.49331800 | O              | -0.11263700 | 1.96997400  | 1.85916700  |
| C              | 4.15886500  | -1.50840500 | -0.00382000 | K              | 3.34336800  | 1.94960500  | -0.63924400 |
| C              | 5.01532300  | -0.93536000 | 0.94118200  | I              | 3.79617200  | -1.55020600 | -0.49764100 |
| C              | 4.78776700  | 0.36863400  | 1.40127500  | O              | 2.08253900  | 1.70868700  | 1.65590800  |
| C              | 3.70219800  | 1.12898400  | 0.94520500  | K              | 0.98376800  | -0.62720600 | 2.14219900  |
| H              | 4.32842500  | -2.52040800 | -0.36086200 |                |             |             |             |
| H              | 5.86668500  | -1.49707400 | 1.31327700  | <b>42-TS-c</b> |             |             |             |
| H              | 5.46594000  | 0.80909200  | 2.12801100  | Pd             | 1.10031200  | 1.22806500  | -0.33053400 |
| O              | 1.69160700  | 1.11869900  | -0.35817800 | C              | -2.32747700 | 0.32256700  | -0.94358400 |
| C              | 0.96523800  | 0.36546400  | -1.33793300 | C              | -2.12779000 | 1.47975200  | -0.18320400 |
| H              | -0.10123900 | 0.60852800  | -1.18054600 | C              | -3.03025600 | 1.76353200  | 0.84604400  |
| H              | 1.24265900  | 0.69293000  | -2.33996900 | C              | -4.11511900 | 0.91169700  | 1.07115600  |
| C              | 2.00995400  | -1.26084200 | -1.42717700 | C              | -4.29607900 | -0.22830400 | 0.27800500  |
| H              | 1.78698200  | -2.33380100 | -1.24761300 | C              | -3.40448300 | -0.55474600 | -0.75206900 |
| H              | 2.26289600  | -1.16973400 | -2.48365700 | H              | -2.88249700 | 2.64494200  | 1.46382000  |
| C              | 3.41237600  | 2.52690700  | 1.42990800  | H              | -4.82570700 | 1.13603000  | 1.86072200  |
| H              | 3.48910100  | 3.24927800  | 0.61000400  | H              | -5.14774200 | -0.87968700 | 0.45780100  |
| H              | 2.39036900  | 2.61693900  | 1.81714100  | O              | -1.33097000 | 0.01181000  | -1.82566000 |
| H              | 4.11005800  | 2.82583500  | 2.21656800  | C              | -0.39204600 | 1.08718200  | -1.96052300 |
| Pd             | -0.02055700 | -1.45390200 | -0.51839000 | H              | 0.55087600  | 0.62259300  | -2.30735300 |
| I              | -1.65942400 | -2.56089900 | 1.36976900  | H              | -0.72714700 | 1.77749600  | -2.73574900 |
| K              | 1.22792300  | -0.91210800 | 2.29804100  | C              | -0.87495800 | 2.22900900  | -0.52015800 |
|                |             |             |             | H              | -0.35552000 | 2.54089100  | 0.41541100  |
| <b>42-TS-b</b> |             |             |             | H              | -1.03884500 | 3.13817000  | -1.09946200 |
| Pd             | 1.17048900  | -1.10044900 | -1.05439800 | C              | -3.55740500 | -1.77755100 | -1.62063400 |
| C              | -2.11295000 | -0.18452800 | 0.39109700  | H              | -3.69698300 | -1.49783700 | -2.67052500 |
| C              | -1.69457900 | 0.63202300  | -0.66029900 | H              | -2.66278100 | -2.41177800 | -1.59335900 |
| C              | -2.18117900 | 1.94074100  | -0.72072100 | H              | -4.41460500 | -2.37963800 | -1.30823900 |
| C              | -3.08904400 | 2.38505400  | 0.24522700  | H              | 4.69543000  | -0.03766200 | 1.67751400  |
| C              | -3.49165400 | 1.53431700  | 1.28305900  | C              | 2.88897200  | -0.48191100 | 1.44350200  |
| C              | -3.00417900 | 0.22712400  | 1.38737900  | O              | 2.85558100  | 0.54142600  | 0.68281300  |
| H              | -1.83742000 | 2.60826400  | -1.50397700 | O              | 4.11130500  | -0.73596700 | 2.00703300  |
| H              | -3.48226900 | 3.39565100  | 0.19398800  | O              | 1.96831800  | -1.27019300 | 1.73614700  |
| H              | -4.19385700 | 1.89303000  | 2.03108100  | K              | -0.38241500 | -1.25003900 | 0.96178000  |
| O              | -1.51867100 | -1.42298200 | 0.44957000  |                |             |             |             |
| C              | -0.91169800 | -1.73704700 | -0.80388400 | <b>42-TS-d</b> |             |             |             |
| H              | -0.28674500 | -2.63166100 | -0.63197200 | C              | -2.06587400 | -0.16334300 | 0.43198000  |
| H              | -1.67637500 | -1.99667800 | -1.53937300 | C              | -1.57236900 | 0.70041300  | -0.54415500 |
| C              | -0.66862300 | 0.03223400  | -1.57335200 | C              | -1.99686100 | 2.03157900  | -0.53633100 |
| H              | 0.19020200  | 0.73246000  | -1.63752900 | C              | -2.92065600 | 2.45209800  | 0.42563500  |
| H              | -1.02823200 | -0.15853000 | -2.58497700 | C              | -3.39529900 | 1.55592000  | 1.39147300  |
| C              | -3.38028100 | -0.70094000 | 2.51308300  | C              | -2.97114200 | 0.22282300  | 1.42452900  |
| H              | -3.62202000 | -1.70023000 | 2.13818500  | H              | -1.59531300 | 2.73133200  | -1.26225200 |

|                |             |             |             |                |             |             |             |
|----------------|-------------|-------------|-------------|----------------|-------------|-------------|-------------|
| H              | -3.26624600 | 3.48123700  | 0.43013700  | H              | -2.98062000 | -1.77619500 | -2.40904200 |
| H              | -4.10533300 | 1.89830800  | 2.13978200  | H              | -2.38768500 | -2.52471200 | -0.93645100 |
| O              | -1.53817300 | -1.43282500 | 0.40394600  | H              | -4.13002800 | -2.43588000 | -1.22458400 |
| C              | -0.92233800 | -1.66825200 | -0.86476900 | C              | 3.48810200  | -0.11466300 | 0.00496900  |
| H              | -0.36413200 | -2.61994900 | -0.75785500 | O              | 2.66489500  | 0.64490000  | 0.82845300  |
| H              | -1.68656300 | -1.81814200 | -1.63202600 | O              | 4.68102700  | 0.29546800  | -0.12928000 |
| C              | -0.53181500 | 0.10878100  | -1.44888100 | O              | 2.99817100  | -1.16205500 | -0.51152300 |
| H              | 0.37577100  | 0.74210600  | -1.36674400 | K              | 0.75496800  | -1.37057000 | 0.52784200  |
| H              | -0.83274000 | 0.06181400  | -2.49623800 | K              | 4.39844600  | 2.45771700  | 1.04253900  |
| C              | -3.42559400 | -0.75785000 | 2.47366900  |                |             |             |             |
| H              | -3.70051000 | -1.71789500 | 2.02564300  | <b>42-TS-f</b> |             |             |             |
| H              | -2.62669600 | -0.96260900 | 3.19910300  | C              | -2.00413000 | -0.13688000 | 0.34025900  |
| H              | -4.28348200 | -0.37127900 | 3.03020700  | C              | -1.72256500 | 0.57986900  | -0.82240200 |
| Pd             | 1.20363900  | -1.22009200 | -1.02910100 | C              | -2.28905500 | 1.84717200  | -0.97916300 |
| H              | -0.61705000 | 2.15030500  | 1.49266800  | C              | -3.14385900 | 2.34641000  | 0.00835800  |
| C              | 1.28678700  | 1.93250500  | 1.53909900  | C              | -3.41054300 | 1.59484100  | 1.15798600  |
| O              | 1.35031300  | 2.51004700  | 0.43098700  | C              | -2.83581000 | 0.33472300  | 1.35881600  |
| O              | 0.02087100  | 1.75415500  | 2.10733500  | H              | -2.05892200 | 2.43712800  | -1.86138600 |
| O              | 2.21115000  | 1.39958400  | 2.21216500  | H              | -3.59795200 | 3.32493700  | -0.11321500 |
| K              | 1.02641300  | -0.98272900 | 2.23328800  | H              | -4.06663000 | 1.99859200  | 1.92462300  |
| C              | 3.76007200  | -2.21111200 | 0.30031000  | O              | -1.33659700 | -1.33393900 | 0.46305200  |
| O              | 3.27143200  | -1.70844800 | -0.82504600 | C              | -0.81480200 | -1.73154800 | -0.80516600 |
| O              | 4.65546000  | -3.12787200 | 0.21395700  | H              | -0.11271700 | -2.56012800 | -0.59754800 |
| K              | 3.67970000  | 1.09057600  | 0.01733000  | H              | -1.61684400 | -2.12604600 | -1.43432200 |
| I              | 7.17028600  | -0.03092400 | -0.41391900 | C              | -0.74620200 | -0.07596100 | -1.75341400 |
| K              | 5.31655100  | -2.48555600 | -2.21061600 | H              | 0.08011000  | 0.64065200  | -1.96184900 |
| O              | 3.41232600  | -1.70641000 | 1.43542100  | H              | -1.18050800 | -0.37628400 | -2.70801900 |
| K              | 5.91007300  | -2.04937100 | 2.22068900  | C              | -3.04171100 | -0.46231900 | 2.62002500  |
|                |             |             |             | H              | -3.10601400 | -1.53372200 | 2.40878800  |
| <b>42-TS-e</b> |             |             |             | H              | -2.20449600 | -0.31327400 | 3.31564300  |
| Pd             | 1.00269900  | 1.63266900  | -0.06993800 | H              | -3.95185100 | -0.15155200 | 3.14039000  |
| C              | -2.21889900 | 0.38105600  | -0.82494500 | Pd             | 1.20431700  | -0.99342600 | -1.25964600 |
| C              | -2.20413700 | 1.63874400  | -0.21433400 | C              | 1.26056800  | 2.13589200  | 1.27105800  |
| C              | -3.26761800 | 1.98029900  | 0.62436100  | O              | 1.44350900  | 2.58607500  | 0.11807700  |
| C              | -4.31919100 | 1.08054700  | 0.81455500  | O              | -0.06028900 | 1.96833500  | 1.70021900  |
| C              | -4.30328800 | -0.16772800 | 0.18342200  | O              | 2.11055400  | 1.72682700  | 2.10842500  |
| C              | -3.24657800 | -0.55222500 | -0.65060700 | K              | 1.14705100  | -0.73238900 | 2.28153000  |
| H              | -3.27285900 | 2.94740400  | 1.11982800  | C              | 3.52378500  | -1.97942600 | 0.15770900  |
| H              | -5.15503400 | 1.35055100  | 1.45300500  | O              | 3.31516000  | -1.26345600 | -1.00052700 |
| H              | -5.12844000 | -0.85920700 | 0.33525000  | O              | 3.81735200  | -3.20530600 | 0.04532600  |
| O              | -1.11300700 | 0.06598500  | -1.57359000 | K              | 3.79414500  | 1.12721700  | 0.13460600  |
| C              | -0.31591200 | 1.22919200  | -1.81488800 | K              | 3.32913200  | -3.37340300 | -2.40803000 |
| H              | 0.67758800  | 0.87046700  | -2.12456800 | O              | 3.41870000  | -1.33877000 | 1.25668700  |
| H              | -0.73928600 | 1.80525500  | -2.64114000 | H              | -0.62638500 | 2.26375200  | 0.97056400  |
| C              | -0.98143700 | 2.46013600  | -0.49711600 |                |             |             |             |
| H              | -0.56152500 | 2.85986600  | 0.46238100  | <b>42-TS-g</b> |             |             |             |
| H              | -1.15288700 | 3.31879100  | -1.14773300 | C              | -1.76066300 | -0.05495400 | 0.45849900  |
| C              | -3.18905400 | -1.89145100 | -1.34052600 | C              | -1.69957100 | 0.53273900  | -0.80861000 |

|                |             |             |             |              |             |             |             |
|----------------|-------------|-------------|-------------|--------------|-------------|-------------|-------------|
| C              | -2.26830500 | 1.79707000  | -0.98028000 | H            | -3.50443100 | -0.19632200 | 3.46669500  |
| C              | -2.89674200 | 2.42849800  | 0.09572600  | Pd           | 0.98901800  | -0.83896400 | -1.28939800 |
| C              | -2.94471300 | 1.80817300  | 1.34868300  | C            | 1.67295300  | 0.36692300  | 3.35326200  |
| C              | -2.37108500 | 0.54917800  | 1.56429900  | O            | 0.41998000  | 0.26182500  | 3.01442900  |
| H              | -2.22215800 | 2.28020500  | -1.95248300 | O            | 2.33263400  | -0.69245300 | 3.72567300  |
| H              | -3.35360100 | 3.40420500  | -0.03961400 | K            | 0.66986400  | 2.13447900  | 1.28834400  |
| H              | -3.44058400 | 2.30624800  | 2.17823600  | I            | 3.55683000  | -0.47958300 | -0.42972300 |
| O              | -1.10227600 | -1.25050600 | 0.59517900  | K            | 0.81366800  | -2.13991000 | 2.20606800  |
| C              | -0.73034300 | -1.78259000 | -0.68090500 | O            | 2.28488500  | 1.50845400  | 3.21869200  |
| H              | 0.07337500  | -2.51118200 | -0.48944700 | K            | 4.53654500  | 0.34700500  | 2.97039200  |
| H              | -1.57577000 | -2.31553500 | -1.12085300 |              |             |             |             |
| C              | -0.95158700 | -0.26448900 | -1.83459600 | <b>43</b>    |             |             |             |
| H              | -0.24064500 | 0.40327000  | -2.38471300 | Pd           | 0.82960100  | 0.07092200  | 0.68211000  |
| H              | -1.58516800 | -0.73346500 | -2.58862200 | C            | 2.63199200  | 2.24909600  | -0.01018800 |
| C              | -2.39602300 | -0.14640500 | 2.90214600  | C            | 1.27384700  | 1.90965400  | 0.09928400  |
| H              | -2.74498000 | -1.17921500 | 2.80252600  | C            | 0.32517600  | 2.85072800  | -0.32439100 |
| H              | -1.39779500 | -0.20011000 | 3.35732500  | C            | 0.72468300  | 4.06137000  | -0.89841000 |
| H              | -3.04877400 | 0.37751100  | 3.60548600  | C            | 2.08208300  | 4.36917100  | -1.01898900 |
| Pd             | 1.14199900  | -0.85282700 | -1.47686500 | C            | 3.04079800  | 3.45950700  | -0.57037100 |
| K              | 1.53072400  | 0.10267700  | 1.43712900  | H            | -0.73161700 | 2.63790000  | -0.19449800 |
| C              | 3.83593200  | -1.46360900 | -0.07970500 | H            | -0.02607400 | 4.77176600  | -1.23321800 |
| O              | 3.25426200  | -0.77657800 | -1.04734500 | H            | 2.39424000  | 5.31645000  | -1.44859500 |
| O              | 5.12316100  | -1.57522700 | -0.12966200 | H            | 4.10366200  | 3.67537800  | -0.64047400 |
| I              | 4.67689600  | 1.69128100  | 2.30106600  | O            | 3.61722900  | 1.36455200  | 0.46308800  |
| K              | 5.28157600  | 0.78483600  | -1.19741800 | C            | 4.16034200  | 0.51279600  | -0.55698000 |
| O              | 3.15487400  | -1.90653100 | 0.91983100  | H            | 3.38579200  | -0.14251500 | -0.97446900 |
| K              | 5.29847400  | -1.86448100 | 2.39894200  | H            | 4.60620000  | 1.10720000  | -1.36281600 |
|                |             |             |             | H            | 4.93041800  | -0.10473300 | -0.08813100 |
| <b>42-TS-h</b> |             |             |             | C            | 1.63629900  | -2.56723700 | 1.55946100  |
| C              | -2.00841000 | -0.19129100 | 0.39806100  | O            | 0.60087500  | -2.02994600 | 1.03922600  |
| C              | -1.80915300 | 0.58884900  | -0.74770100 | O            | 2.69545600  | -1.95203100 | 1.85856600  |
| C              | -2.25228100 | 1.91730100  | -0.74157600 | C            | 1.53801900  | -4.05477900 | 1.86198900  |
| C              | -2.89497500 | 2.42749800  | 0.39151300  | H            | 1.13405500  | -4.17813200 | 2.87349500  |
| C              | -3.07272800 | 1.61858300  | 1.52189100  | H            | 0.85616600  | -4.54796100 | 1.16676800  |
| C              | -2.62500500 | 0.29175500  | 1.56003600  | H            | 2.52590300  | -4.51914400 | 1.82883100  |
| H              | -2.10123500 | 2.53841000  | -1.62082200 | K            | 3.38112800  | 0.19797300  | 2.97631100  |
| H              | -3.26418100 | 3.44913200  | 0.39405800  | I            | -0.08302400 | 1.09090000  | 2.98901100  |
| H              | -3.55950200 | 2.02673700  | 2.40383100  |              |             |             |             |
| O              | -1.47042200 | -1.45441200 | 0.36521200  | <b>44-TS</b> |             |             |             |
| C              | -0.97604200 | -1.78377100 | -0.93530500 | Pd           | 1.09287900  | -0.06274100 | 0.03401700  |
| H              | -0.23263100 | -2.59283900 | -0.80384500 | C            | 2.85253000  | 2.21651700  | -0.24704000 |
| H              | -1.78124500 | -2.18305800 | -1.55402300 | C            | 1.47463500  | 1.89588000  | -0.21496800 |
| C              | -1.02324900 | -0.06600800 | -1.84059600 | C            | 0.56100500  | 2.95108900  | -0.34366800 |
| H              | -0.25730200 | 0.63436500  | -2.23829100 | C            | 0.99898600  | 4.27632600  | -0.44966000 |
| H              | -1.61275900 | -0.39896500 | -2.69491800 | C            | 2.36502100  | 4.56890600  | -0.44314000 |
| C              | -2.70700400 | -0.54810800 | 2.80590500  | C            | 3.30004500  | 3.53782000  | -0.35148500 |
| H              | -2.89499700 | -1.59939100 | 2.56558300  | H            | -0.50118900 | 2.73642700  | -0.33224800 |
| H              | -1.75256800 | -0.47132600 | 3.34258600  | H            | 0.26942400  | 5.07701200  | -0.53184400 |



|           |             |             |             |              |             |             |             |
|-----------|-------------|-------------|-------------|--------------|-------------|-------------|-------------|
| H         | 2.70618200  | 5.59675500  | -0.52875300 | C            | 4.75362600  | 2.75538100  | -3.74820400 |
| H         | 4.36810000  | 3.73020000  | -0.38812300 | C            | 5.85234400  | 3.49502400  | -4.19383000 |
| O         | 3.79721500  | 1.22803400  | -0.13335500 | C            | 7.13673300  | 3.19684800  | -3.71427900 |
| C         | 3.29105500  | -0.05844500 | -0.53502100 | C            | 7.34064200  | 2.18521000  | -2.76700800 |
| H         | 2.86605000  | -0.79352000 | 0.61837000  | H            | 3.75985600  | 2.97523000  | -4.12809600 |
| H         | 2.97235300  | -0.04256200 | -1.58514800 | H            | 5.71225600  | 4.29935800  | -4.91054900 |
| H         | 4.14018000  | -0.74913000 | -0.49221200 | H            | 7.98267400  | 3.78523700  | -4.06173000 |
| C         | 1.96943800  | -2.46411800 | 1.37230000  | O            | 6.38029500  | 0.55579700  | -1.33027100 |
| O         | 1.05879800  | -2.24489800 | 0.54685700  | C            | 7.77026200  | 0.19580100  | -1.15387500 |
| O         | 2.90588900  | -1.59666400 | 1.63999900  | H            | 7.92868200  | -0.00054900 | -0.09168700 |
| C         | 2.03072100  | -3.77628800 | 2.11578800  | H            | 7.99244900  | -0.70274600 | -1.74203800 |
| H         | 1.93136600  | -3.58719700 | 3.18973200  | C            | 10.75488600 | 2.94270900  | -4.01661400 |
| H         | 1.23092700  | -4.43803500 | 1.78462600  | O            | 10.23166000 | 1.92205400  | -4.67118600 |
| H         | 3.00646500  | -4.24410900 | 1.95574800  | O            | 10.43096300 | 3.23679000  | -2.86144600 |
| K         | 2.21137300  | 1.08439200  | 2.70150600  | C            | 11.79480000 | 3.69178300  | -4.79736800 |
| I         | -1.26620000 | 0.28723400  | 1.36633100  | H            | 12.72097700 | 3.10707800  | -4.78444300 |
|           |             |             |             | H            | 11.48513600 | 3.80442200  | -5.83827900 |
|           |             |             |             | H            | 11.97724900 | 4.66429100  | -4.34065800 |
| <b>45</b> |             |             |             | H            | 9.57893700  | 1.47262600  | -4.07469200 |
| Pd        | 1.88010400  | 0.23050700  | 0.74374500  | K            | 10.80358900 | 4.18255700  | -0.30183800 |
| C         | 2.97552200  | 2.42397000  | -0.75792500 | I            | 11.25984900 | 0.72521200  | -0.37682300 |
| C         | 1.82067700  | 2.08631500  | -0.00874000 | C            | 7.81741900  | 6.07679000  | 0.78705500  |
| C         | 0.82869600  | 3.06961200  | 0.13361500  | O            | 8.63477400  | 5.16375500  | 0.40480500  |
| C         | 1.01508700  | 4.36591000  | -0.37548500 | O            | 6.57239500  | 5.95124000  | 0.82900800  |
| C         | 2.18946500  | 4.68142800  | -1.06671400 | C            | 8.44331100  | 7.40608100  | 1.21578100  |
| C         | 3.17236600  | 3.70964000  | -1.27522500 | H            | 9.02378000  | 7.82405800  | 0.38551900  |
| H         | -0.08697500 | 2.82569400  | 0.66635700  | H            | 7.67876300  | 8.12156000  | 1.52138400  |
| H         | 0.24135500  | 5.11713000  | -0.24108700 | H            | 9.13734000  | 7.23464100  | 2.04599000  |
| H         | 2.33426100  | 5.68162000  | -1.46637800 | K            | 6.47913400  | 3.52608100  | -0.11466100 |
| H         | 4.07285600  | 3.92633700  | -1.84181100 | H            | 4.08042500  | 1.13178500  | -2.46822700 |
| O         | 3.92109200  | 1.47192000  | -0.92523700 |              |             |             |             |
| C         | 3.41337100  | 0.16311500  | -0.59048900 |              |             |             |             |
| H         | 0.34781300  | -1.80632900 | 2.53153800  | <b>47-TS</b> |             |             |             |
| H         | 3.03055100  | -0.31937900 | -1.49973700 | Pd           | 2.68593600  | 0.64063500  | 2.11091500  |
| H         | 4.23899900  | -0.41902200 | -0.17186300 | C            | 1.88885000  | 2.89121900  | 0.24594600  |
| C         | 1.71200600  | -2.87495600 | 1.73430800  | C            | 1.70065600  | 1.52134800  | 0.49619000  |
| O         | 2.32584500  | -1.93612900 | 1.22727600  | C            | 0.44001600  | 0.96074100  | 0.23151500  |
| O         | 0.59467400  | -2.75950800 | 2.42876500  | C            | -0.61545700 | 1.85265800  | -0.04659800 |
| C         | 2.17961500  | -4.30106500 | 1.61367700  | C            | -0.40548600 | 3.23557800  | -0.14816800 |
| H         | 1.40950400  | -4.89188000 | 1.10867300  | C            | 0.88374000  | 3.79008700  | -0.04458700 |
| H         | 3.11115000  | -4.34018100 | 1.05089900  | H            | 0.26287300  | -0.10807700 | 0.28938500  |
| H         | 2.31712700  | -4.72881000 | 2.61080200  | H            | -1.61833000 | 1.45790600  | -0.18691500 |
| K         | 2.63153500  | 2.80620100  | 2.66937900  | H            | -1.24680700 | 3.89047200  | -0.34970000 |
| I         | -0.04344600 | 0.61174300  | 2.98626800  | H            | 1.07138300  | 4.84467600  | -0.21170300 |
|           |             |             |             | O            | 3.26733600  | 3.01270300  | 0.22286300  |
| <b>46</b> |             |             |             | C            | 3.47533400  | 1.56131000  | 0.20277900  |
| Pd        | 9.04159200  | 1.60600500  | -1.83908500 | H            | 3.55397200  | 1.19741600  | -0.82205900 |
| C         | 6.20639800  | 1.46082200  | -2.33317400 | H            | 4.38734100  | 1.29574500  | 0.76034000  |
| C         | 4.92091700  | 1.72403200  | -2.81729200 | K            | 3.65199400  | 3.60017000  | 3.20992400  |

|              |             |             |             |              |             |             |             |
|--------------|-------------|-------------|-------------|--------------|-------------|-------------|-------------|
| I            | 2.63677600  | 0.27595800  | 4.80540900  | O            | 8.48398200  | -1.79977400 | 1.75511600  |
| C            | 0.35922500  | 5.27100900  | 3.03365200  | C            | 8.26149200  | -4.19129700 | 1.80649700  |
| O            | 1.39393100  | 4.57431200  | 3.33065300  | H            | 9.25125800  | -4.18023400 | 1.34798400  |
| O            | -0.81812100 | 4.84383700  | 3.04122300  | H            | 8.28697300  | -4.77673300 | 2.73147000  |
| C            | 0.62016300  | 6.71967100  | 2.61803200  | H            | 7.55322700  | -4.68332900 | 1.13015300  |
| H            | -0.31379100 | 7.25412700  | 2.43856300  | K            | 6.91841700  | 0.09299100  | 2.61720400  |
| H            | 1.19815800  | 7.23201100  | 3.39404400  |              |             |             |             |
| H            | 1.22572900  | 6.72823300  | 1.70405900  | <b>50</b>    |             |             |             |
| K            | -0.21770500 | 2.33707700  | 3.44538000  | Pd           | 3.72898600  | 0.14894200  | 1.46875600  |
|              |             |             |             | C            | 1.95820500  | 1.09367200  | 1.23117700  |
| <b>48</b>    |             |             |             | H            | 1.33876400  | 0.43847800  | 0.61878100  |
| Pd           | 1.56092000  | 0.57848500  | 2.10747400  | H            | 1.55530800  | 1.26585600  | 2.22766900  |
| C            | 1.91425900  | 2.91226900  | 0.23733100  | H            | 2.22094400  | 2.01748300  | 0.71235400  |
| C            | 1.96575100  | 1.50006300  | 0.18119400  | I            | 4.07034200  | -0.64570400 | -1.06449200 |
| C            | 0.77288600  | 0.74726600  | 0.03405500  | K            | 4.20634900  | -3.05444300 | 2.12458200  |
| C            | -0.43227600 | 1.53446900  | 0.05339300  | I            | 4.04663200  | 0.38727000  | 4.11458600  |
| C            | -0.42181200 | 2.92293500  | 0.14246900  | C            | 7.88393400  | -2.80957300 | 2.04378600  |
| C            | 0.78388600  | 3.68260500  | 0.21098000  | O            | 6.62161400  | -2.57925200 | 2.01444600  |
| H            | 0.74620500  | -0.28225400 | -0.31160300 | O            | 8.77127700  | -1.94335400 | 1.86646500  |
| H            | -1.38297900 | 1.01870700  | -0.04713300 | C            | 8.30129900  | -4.25555900 | 2.31405500  |
| H            | -1.36427400 | 3.46296500  | 0.13855800  | H            | 9.38729500  | -4.35390700 | 2.33657100  |
| H            | 0.77698200  | 4.76535800  | 0.22173200  | H            | 7.88312400  | -4.58661400 | 3.27099900  |
| O            | 3.29511700  | 3.12855800  | 0.12331700  | H            | 7.89189000  | -4.90654700 | 1.53358800  |
| C            | 3.44868300  | 1.66454900  | -0.14899000 | K            | 7.19347000  | 0.05778900  | 1.48468300  |
| H            | 3.72098500  | 1.52196600  | -1.19897800 |              |             |             |             |
| H            | 4.18747500  | 1.20636700  | 0.51193400  | <b>51-TS</b> |             |             |             |
| K            | 3.40198600  | 3.40736500  | 3.12898500  | Pd           | 0.46590700  | -0.35244100 | -0.74873300 |
| I            | 2.15466300  | 0.34422400  | 4.75028700  | C            | 0.47504000  | -2.04757200 | 0.62189600  |
| C            | 0.38709900  | 5.48509400  | 3.04360700  | C            | 0.43489200  | -1.50809500 | 1.91531600  |
| O            | 1.29853400  | 4.68272900  | 3.45358500  | C            | 1.01701700  | -3.32494900 | 0.43871100  |
| O            | -0.82552300 | 5.19180500  | 2.92291400  | C            | 1.06322900  | -2.23549800 | 2.94146100  |
| C            | 0.85191500  | 6.88908600  | 2.65108500  | H            | 0.01302300  | -0.53501400 | 2.14560200  |
| H            | 0.00554800  | 7.53224300  | 2.40591900  | C            | 1.62199200  | -4.07607000 | 1.43324800  |
| H            | 1.43364500  | 7.33085300  | 3.46628000  | C            | 1.65657100  | -3.48331400 | 2.70269000  |
| H            | 1.51592600  | 6.81916100  | 1.78076000  | H            | 1.11482500  | -1.79398400 | 3.93283100  |
| K            | -0.57088500 | 2.67195700  | 3.59608600  | H            | 2.01237300  | -5.06991900 | 1.24419000  |
|              |             |             |             | H            | 2.13365500  | -4.01263600 | 3.52225200  |
| <b>49-TS</b> |             |             |             | C            | -0.24449000 | -2.56647000 | -1.00394300 |
| Pd           | 3.60353300  | 0.12736200  | 2.24268300  | H            | -1.26214700 | -2.81700900 | -0.70927600 |
| C            | 2.23824000  | 0.82376500  | 0.04269200  | H            | -0.21389000 | -2.17493800 | -2.02516600 |
| H            | 1.36949400  | 0.21510700  | -0.18197300 | I            | 1.10305300  | 2.23933600  | -1.26745000 |
| H            | 2.19206500  | 1.27449100  | 1.03952100  | C            | 2.41797400  | -0.82826300 | -1.21465600 |
| H            | 2.47890700  | 1.55254700  | -0.72324800 | H            | 2.43213800  | -1.90688700 | -1.37896900 |
| I            | 3.99141700  | -0.70803400 | -0.33023900 | H            | 2.69111100  | -0.27677100 | -2.11233500 |
| K            | 4.26456800  | -2.87943200 | 3.31183300  | H            | 3.03723500  | -0.53542900 | -0.36665000 |
| I            | 3.95346300  | 0.35463800  | 4.90440400  | O            | 0.67220600  | -3.65480600 | -0.84202800 |
| C            | 7.77561900  | -2.77234400 | 2.10721800  | K            | -2.59410900 | -1.29499400 | 2.76063100  |
| O            | 6.64678000  | -2.67518800 | 2.70669000  | I            | -2.48722100 | 0.09450000  | -0.38009200 |

|              |             |             |             |                |             |             |             |
|--------------|-------------|-------------|-------------|----------------|-------------|-------------|-------------|
| C            | -0.75609800 | 1.43701200  | 4.44668000  | H              | 2.94412400  | 0.66471800  | -0.60264600 |
| O            | -1.36427600 | 0.67217200  | 3.61020800  | H              | 1.44138400  | -0.35181000 | -2.29958700 |
| O            | -0.37168200 | 2.59965200  | 4.20023400  | H              | 1.39289200  | 0.53783000  | -4.61942100 |
| C            | -0.49141300 | 0.84200800  | 5.83151200  | H              | 2.90164500  | 2.42500800  | -5.27092100 |
| H            | 0.02836200  | 1.55396700  | 6.47368400  | O              | 4.56040200  | 3.62575500  | -3.61023000 |
| H            | -1.43969100 | 0.55258600  | 6.29807800  | C              | 5.77744400  | 3.55753800  | -2.89376300 |
| H            | 0.11232400  | -0.06714000 | 5.73048600  | H              | 6.19463900  | 4.55846900  | -2.79646400 |
| K            | -0.91131400 | 2.71741000  | 1.64028600  | Pd             | 5.53359400  | 2.64071800  | -1.05408700 |
|              |             |             |             | C              | 3.64457800  | 3.72598100  | -0.68719800 |
| <b>52</b>    |             |             |             | H              | 2.89509300  | 3.23179400  | -0.07870200 |
| C            | 3.60443800  | 1.83424400  | -3.32990000 | H              | 4.31346600  | 4.31898200  | -0.05347400 |
| C            | 3.18801000  | 2.21810000  | -2.04252500 | H              | 3.23091700  | 4.34055200  | -1.48111600 |
| C            | 1.82756800  | 2.20354500  | -1.73861800 | H              | 6.46920700  | 2.85960600  | -3.37649500 |
| C            | 0.90689300  | 1.69540200  | -2.67345600 | I              | 8.29305900  | 3.08572900  | -0.68182000 |
| C            | 1.35129200  | 1.24415400  | -3.92113600 | K              | 8.30832800  | -0.26684200 | 0.71714300  |
| C            | 2.70504800  | 1.32668800  | -4.26818600 | I              | 5.12765100  | 1.15544500  | 1.44635800  |
| H            | 1.49103300  | 2.54658500  | -0.76453500 | C              | 9.88417700  | 0.92431900  | 3.87657400  |
| H            | -0.15028200 | 1.66007600  | -2.42485000 | O              | 9.27556500  | 0.61839700  | 2.79057600  |
| H            | 0.63902100  | 0.85594600  | -4.64366800 | O              | 9.68391200  | 1.97087200  | 4.53689400  |
| H            | 3.06010900  | 1.02930000  | -5.24986100 | C              | 10.92238600 | -0.08099000 | 4.37625300  |
| O            | 4.93414300  | 1.94124800  | -3.61889900 | H              | 11.39088300 | 0.26303300  | 5.29935500  |
| C            | 5.56639800  | 2.88114300  | -2.77218600 | H              | 10.44108800 | -1.05004700 | 4.54723700  |
| H            | 5.33992000  | 3.90783300  | -3.06835100 | H              | 11.68857200 | -0.22979300 | 3.60771300  |
| Pd           | 4.80799200  | 2.61488200  | -0.86709200 | K              | 7.85978600  | 3.00063100  | 3.00653200  |
| C            | 4.21663300  | 4.58368100  | -0.79674700 |                |             |             |             |
| H            | 3.47006200  | 4.78832700  | -1.56264600 | <b>53-TS-a</b> |             |             |             |
| H            | 3.80827200  | 4.67386900  | 0.20962200  | C              | 3.79278800  | 2.51668500  | -3.28440900 |
| H            | 5.11756700  | 5.18092900  | -0.92668900 | C              | 3.75681700  | 2.11481100  | -1.93266300 |
| H            | 6.63162100  | 2.67034300  | -2.73650100 | C              | 2.84938100  | 1.11616700  | -1.54438100 |
| I            | 7.31382500  | 3.24818300  | 0.36255300  | C              | 2.03277100  | 0.50724600  | -2.49755300 |
| K            | 2.92289100  | -0.57039000 | -0.71284400 | C              | 2.09876500  | 0.90557900  | -3.84249700 |
| I            | 3.23327000  | 1.86054500  | 1.79348800  | C              | 2.97151300  | 1.91365000  | -4.24250800 |
| C            | 6.41035600  | -0.30552400 | -0.91336200 | H              | 2.75203600  | 0.86292000  | -0.49215500 |
| O            | 5.29211200  | 0.34587800  | -0.83800500 | H              | 1.31816500  | -0.25193600 | -2.19113100 |
| O            | 6.76802100  | -1.11658400 | -0.03379000 | H              | 1.45453700  | 0.43381600  | -4.57828500 |
| C            | 7.30494200  | -0.03155000 | -2.10823100 | H              | 3.03281000  | 2.24168500  | -5.27466000 |
| H            | 7.92531000  | 0.83894200  | -1.86511000 | O              | 4.60566200  | 3.54475900  | -3.62136000 |
| H            | 7.96369700  | -0.88118700 | -2.29559800 | C              | 5.77249100  | 3.60676100  | -2.81497400 |
| H            | 6.70978100  | 0.20887800  | -2.99149200 | H              | 6.09027000  | 4.64436900  | -2.72818200 |
| K            | 6.39163100  | 0.40847200  | 2.08135900  | Pd             | 5.51273000  | 2.67471700  | -1.01315200 |
|              |             |             |             | C              | 3.61001400  | 3.76683100  | -0.68516700 |
| <b>53-TS</b> |             |             |             | H              | 2.89192200  | 3.28868500  | -0.02564400 |
| C            | 3.74940900  | 2.57950400  | -3.30503900 | H              | 4.28311200  | 4.41948900  | -0.12046800 |
| C            | 3.77623100  | 2.09797300  | -1.97855900 | H              | 3.13768500  | 4.32717100  | -1.48628300 |
| C            | 2.93852500  | 1.03232300  | -1.62230000 | H              | 6.55500600  | 2.96588900  | -3.23763700 |
| C            | 2.09132500  | 0.47224900  | -2.57790200 | I              | 8.06140300  | 3.54979000  | -0.30738900 |
| C            | 2.06311000  | 0.97587400  | -3.88566300 | C              | 4.41527800  | 1.26322700  | 1.55456500  |
| C            | 2.89345400  | 2.03080900  | -4.26027500 | O              | 5.41026600  | 1.20338000  | 0.71727500  |

|                |            |             |             |              |             |             |             |
|----------------|------------|-------------|-------------|--------------|-------------|-------------|-------------|
| O              | 3.53345500 | 0.38777200  | 1.62788300  | H            | 1.46191700  | 0.68319400  | -4.82356900 |
| C              | 4.37834500 | 2.45423400  | 2.50323400  | H            | 2.81490200  | 2.74895100  | -5.23173300 |
| H              | 3.35396400 | 2.81747500  | 2.61417100  | O            | 4.36314800  | 3.87675300  | -3.42243100 |
| H              | 4.70683900 | 2.11833400  | 3.49356100  | C            | 5.57954200  | 3.81991100  | -2.70595400 |
| H              | 5.03824700 | 3.25577600  | 2.16591200  | H            | 5.91910600  | 4.83204800  | -2.49332300 |
| K              | 8.00358200 | 0.55536400  | 1.39189000  | Pd           | 5.40995800  | 2.68269400  | -0.98805000 |
| I              | 7.51859800 | -2.69267500 | 0.61721000  | C            | 3.42927100  | 3.56052100  | -0.52295000 |
| K              | 4.50907100 | -1.40128200 | -0.16472600 | H            | 2.70756900  | 2.94413900  | 0.00174100  |
|                |            |             |             | H            | 4.04604800  | 4.10880700  | 0.19734000  |
|                |            |             |             | H            | 2.98524300  | 4.24206800  | -1.24243100 |
|                |            |             |             | H            | 6.32294900  | 3.23056000  | -3.25304500 |
|                |            |             |             | I            | 8.10960700  | 3.43587300  | -0.51159300 |
|                |            |             |             | K            | 8.29467200  | 1.12788900  | 1.89544300  |
|                |            |             |             | I            | 5.05602900  | 0.88549300  | 1.34161700  |
| <b>53-TS-b</b> |            |             |             | <b>54</b>    |             |             |             |
| C              | 3.63485700 | 2.75175100  | -3.22866600 | C            | 3.79282500  | 3.11854900  | -2.13873800 |
| C              | 3.66820000 | 2.09390000  | -1.98312100 | C            | 2.70485100  | 3.34364500  | -1.28259900 |
| C              | 2.99470600 | 0.88222900  | -1.80577600 | C            | 1.87189800  | 2.25187700  | -1.01929000 |
| C              | 2.26519700 | 0.34830800  | -2.86908400 | C            | 2.10246800  | 0.98299300  | -1.57111100 |
| C              | 2.20731500 | 1.02586600  | -4.09511200 | C            | 3.16882800  | 0.78437700  | -2.43963900 |
| C              | 2.89365100 | 2.22596200  | -4.28788000 | C            | 4.00421100  | 1.86934500  | -2.74792700 |
| H              | 3.04858800 | 0.38740500  | -0.84127800 | H            | 1.03188000  | 2.39274600  | -0.34355300 |
| H              | 1.73379800 | -0.59026200 | -2.74225900 | H            | 1.43886900  | 0.16046400  | -1.32349100 |
| H              | 1.62968000 | 0.60762700  | -4.91431700 | H            | 3.36770500  | -0.18107800 | -2.89156200 |
| H              | 2.87929700 | 2.74686900  | -5.23945400 | H            | 4.64611500  | 1.82523900  | -3.64807800 |
| O              | 4.31846400 | 3.91672700  | -3.34100200 | O            | 4.68716600  | 4.13090800  | -2.37829300 |
| C              | 5.50155800 | 3.91499200  | -2.53504000 | C            | 6.01192000  | 3.77096900  | -2.03488700 |
| H              | 5.71919000 | 4.94027700  | -2.23435500 | H            | 6.12136600  | 3.68259100  | -0.94609800 |
| Pd             | 5.31524100 | 2.66117800  | -0.92537500 | Pd           | 6.42998900  | 1.85826400  | -2.62511300 |
| C              | 3.31562200 | 3.45692900  | -0.48006000 | C            | 2.49236000  | 4.70126200  | -0.66393900 |
| H              | 2.66577600 | 2.78247500  | 0.06825100  | H            | 1.65906700  | 4.68537200  | 0.04311900  |
| H              | 3.89921200 | 4.07437400  | 0.21321300  | H            | 3.39040600  | 5.03798100  | -0.13645100 |
| H              | 2.78273900 | 4.09535000  | -1.17827000 | H            | 2.27774400  | 5.45417000  | -1.43016800 |
| H              | 6.32722100 | 3.47403300  | -3.10136200 | H            | 6.68348900  | 4.50918200  | -2.46838000 |
| I              | 8.03635800 | 2.85706800  | -0.37642100 | I            | 6.52651800  | -0.93614100 | -3.48417200 |
| C              | 5.27421200 | 1.11988400  | 1.85930500  | K            | 9.47697900  | -1.13630300 | -1.54350600 |
| O              | 5.82432400 | 0.19805700  | 2.49247000  | I            | 9.08373000  | 2.42070000  | -2.31313500 |
| O              | 5.07286700 | 1.05379200  | 0.57719600  | C            | 11.75271600 | -1.59143500 | -4.45957200 |
| C              | 4.85002200 | 2.38963600  | 2.57768700  | O            | 10.88854100 | -1.36576900 | -3.54006800 |
| H              | 4.92555400 | 2.26001900  | 3.65753900  | O            | 11.69126900 | -1.13417900 | -5.62516400 |
| H              | 5.51378600 | 3.20313300  | 2.26351000  | C            | 12.93043500 | -2.48814000 | -4.07557500 |
| H              | 3.82927300 | 2.66640900  | 2.30111300  | H            | 13.61786300 | -2.61490700 | -4.91300400 |
| K              | 7.19830000 | -0.52073300 | 0.39606300  | H            | 13.46311000 | -2.05017000 | -3.22457000 |
|                |            |             |             | H            | 12.55609400 | -3.46684900 | -3.75617000 |
|                |            |             |             | K            | 9.47288400  | 0.18328300  | -5.35567100 |
| <b>53-TS-c</b> |            |             |             | <b>55-TS</b> |             |             |             |
| C              | 3.63747400 | 2.74137700  | -3.24925600 |              |             |             |             |
| C              | 3.69916100 | 2.11502400  | -1.98572300 |              |             |             |             |
| C              | 2.95076500 | 0.94907000  | -1.76915500 |              |             |             |             |
| C              | 2.15587000 | 0.43779300  | -2.79379800 |              |             |             |             |
| C              | 2.09062900 | 1.08613900  | -4.03492900 |              |             |             |             |
| C              | 2.83316000 | 2.24091700  | -4.27337400 |              |             |             |             |
| H              | 2.98494500 | 0.46479900  | -0.80032800 |              |             |             |             |
| H              | 1.57608700 | -0.46399800 | -2.62172600 |              |             |             |             |

|                |             |             |             |                |            |             |             |
|----------------|-------------|-------------|-------------|----------------|------------|-------------|-------------|
| C              | 3.41945700  | 2.68283200  | -3.47392700 | H              | 4.74117600 | 6.56154200  | 0.25533900  |
| C              | 3.02202900  | 2.68230700  | -2.11616500 | H              | 3.48592300 | 5.43733100  | -0.40707000 |
| C              | 1.74602400  | 2.19069400  | -1.80669700 | H              | 6.20011900 | 4.65223300  | -2.48534600 |
| C              | 0.93333900  | 1.62152600  | -2.80089400 | I              | 6.59601400 | 4.54494100  | 0.78684000  |
| C              | 1.38418100  | 1.57001600  | -4.12578700 | C              | 2.41612900 | 2.46229200  | 1.43336700  |
| C              | 2.62327100  | 2.11336800  | -4.47561700 | O              | 3.63933300 | 2.76566300  | 1.11759700  |
| H              | 1.39920300  | 2.21955700  | -0.77795100 | O              | 2.14994600 | 1.66953400  | 2.35327400  |
| H              | -0.04503400 | 1.22685100  | -2.54042400 | C              | 1.30245300 | 3.12845900  | 0.63717900  |
| H              | 0.75744900  | 1.13036700  | -4.89697300 | H              | 1.40110600 | 2.87336100  | -0.42251800 |
| H              | 2.96851700  | 2.12360600  | -5.50463700 | H              | 0.32665900 | 2.81238600  | 1.00644400  |
| O              | 4.62111300  | 3.21486700  | -3.78404800 | H              | 1.39181700 | 4.21694900  | 0.71842400  |
| C              | 5.13331500  | 4.02872800  | -2.71825300 | K              | 6.90584200 | 1.08910100  | -1.42285100 |
| H              | 4.79779800  | 5.06511000  | -2.85282000 | I              | 7.41441700 | -0.53998800 | 1.43426100  |
| Pd             | 4.46534500  | 3.39911900  | -0.86611900 | K              | 4.77575200 | 1.10788200  | 2.83285900  |
| C              | 4.31348100  | 5.59043900  | 0.36434800  |                |            |             |             |
| H              | 3.53390500  | 5.44611900  | -0.37736900 | <b>55-TS-b</b> |            |             |             |
| H              | 4.05912700  | 5.27857100  | 1.36991200  | C              | 4.48768200 | 1.80782300  | -3.07036100 |
| H              | 4.84627100  | 6.52680300  | 0.26376300  | C              | 3.78385500 | 2.01127000  | -1.86310800 |
| H              | 6.22208800  | 3.97092800  | -2.75442000 | C              | 2.72160700 | 1.15417400  | -1.55543300 |
| I              | 6.71429100  | 4.49670000  | 0.40056700  | C              | 2.40127900 | 0.09009200  | -2.40812100 |
| K              | 3.75473700  | -0.21248300 | -1.54265000 | C              | 3.12776400 | -0.10458800 | -3.58940700 |
| I              | 3.46335800  | 2.07356900  | 1.55106700  | C              | 4.17289500 | 0.75554900  | -3.93771600 |
| C              | 7.20110000  | -1.32400600 | -0.78901900 | H              | 2.17110600 | 1.30920000  | -0.63250300 |
| O              | 6.00000300  | -0.87457200 | -0.72986300 | H              | 1.58992700 | -0.58601800 | -2.15301000 |
| O              | 8.12395200  | -0.99812600 | -0.00711200 | H              | 2.87162400 | -0.92606300 | -4.25313800 |
| C              | 7.49518300  | -2.32075700 | -1.91108500 | H              | 4.72683300 | 0.63285600  | -4.86339800 |
| H              | 8.52318600  | -2.68158300 | -1.85802000 | O              | 5.54271200 | 2.62363700  | -3.32482500 |
| H              | 6.80272500  | -3.16684100 | -1.84565500 | C              | 5.45757100 | 3.83573400  | -2.53322400 |
| H              | 7.32940900  | -1.83700900 | -2.88040300 | H              | 4.83977000 | 4.56486000  | -3.07443600 |
| K              | 6.75169700  | 0.71595800  | 1.38287500  | Pd             | 4.53407400 | 3.50114100  | -0.71604000 |
|                |             |             |             | C              | 4.15751800 | 5.65637900  | 0.25514100  |
| <b>55-TS-a</b> |             |             |             | H              | 3.68846400 | 5.32785300  | 1.17545900  |
| C              | 4.58785100  | 1.99068300  | -3.19866900 | H              | 4.66186500 | 6.61333000  | 0.28187700  |
| C              | 3.99209200  | 1.95586100  | -1.91801000 | H              | 3.55567200 | 5.52275400  | -0.64661000 |
| C              | 3.17608400  | 0.86124800  | -1.60479000 | H              | 6.47565700 | 4.21559400  | -2.43099600 |
| C              | 2.98235000  | -0.17193200 | -2.52979200 | I              | 6.56403700 | 4.68461700  | 0.76966900  |
| C              | 3.58176800  | -0.10662600 | -3.79258300 | C              | 3.73495800 | 1.91834200  | 1.74486400  |
| C              | 4.38757200  | 0.97980800  | -4.14408800 | O              | 4.64957200 | 1.11238800  | 1.45375900  |
| H              | 2.71392200  | 0.79341400  | -0.62510900 | O              | 3.39551400 | 2.95175900  | 1.06859500  |
| H              | 2.37042800  | -1.02880300 | -2.26366500 | K              | 6.13901800 | 0.72592500  | -0.52305600 |
| H              | 3.41800500  | -0.90379100 | -4.51209500 | C              | 2.92724000 | 1.65758700  | 3.01241600  |
| H              | 4.84829700  | 1.05459700  | -5.12422400 | H              | 2.43902200 | 0.68102900  | 2.93037600  |
| O              | 5.46907000  | 3.00078200  | -3.45213700 | H              | 3.60864500 | 1.60728000  | 3.86712100  |
| C              | 5.25589900  | 4.10798600  | -2.55410900 | H              | 2.17648400 | 2.43056300  | 3.18139700  |
| H              | 4.47254300  | 4.75705000  | -2.96826600 |                |            |             |             |
| Pd             | 4.51554300  | 3.52080600  | -0.72889500 | <b>55-TS-c</b> |            |             |             |
| C              | 4.22838300  | 5.61564300  | 0.37837300  | C              | 5.07977100 | 1.76794300  | -3.08755800 |
| H              | 3.87204900  | 5.39290700  | 1.37704300  | C              | 4.25926800 | 1.75690600  | -1.93472300 |

|                |             |             |             |   |            |            |            |
|----------------|-------------|-------------|-------------|---|------------|------------|------------|
| C              | 3.39166800  | 0.66360300  | -1.77007800 | H | 4.78793800 | 0.82806600 | 3.70604400 |
| C              | 3.41373300  | -0.41349100 | -2.66719500 | H | 3.26572800 | 1.76855700 | 3.70070700 |
| C              | 4.27252300  | -0.39008700 | -3.77231800 |   |            |            |            |
| C              | 5.10189700  | 0.70875300  | -4.00079300 |   |            |            |            |
| H              | 2.70916300  | 0.64899900  | -0.92500800 |   |            |            |            |
| H              | 2.75353200  | -1.26197400 | -2.50853500 |   |            |            |            |
| H              | 4.27996400  | -1.22045600 | -4.47311700 |   |            |            |            |
| H              | 5.74296300  | 0.76620700  | -4.87486500 |   |            |            |            |
| O              | 5.88926300  | 2.83964100  | -3.26971300 |   |            |            |            |
| C              | 5.42271900  | 3.95991600  | -2.52337900 |   |            |            |            |
| H              | 4.60497300  | 4.45769300  | -3.06218300 |   |            |            |            |
| Pd             | 4.54221400  | 3.40153200  | -0.72826900 |   |            |            |            |
| C              | 4.06954600  | 5.57597300  | 0.18341800  |   |            |            |            |
| H              | 3.31207500  | 5.15371700  | -0.48873300 |   |            |            |            |
| H              | 3.76249500  | 5.57026800  | 1.22211600  |   |            |            |            |
| H              | 4.49545700  | 6.50076400  | -0.18750200 |   |            |            |            |
| H              | 6.26606700  | 4.63401100  | -2.37360500 |   |            |            |            |
| I              | 6.47635700  | 4.76250800  | 0.76927300  |   |            |            |            |
| K              | 5.89552400  | 0.68028600  | 0.36163900  |   |            |            |            |
| I              | 3.17393800  | 2.33008100  | 1.62323100  |   |            |            |            |
| <b>55-TS-d</b> |             |             |             |   |            |            |            |
| C              | 4.03536700  | 2.22427300  | -3.21550000 |   |            |            |            |
| C              | 3.73315400  | 2.06450300  | -1.84505100 |   |            |            |            |
| C              | 2.80198500  | 1.08463600  | -1.48196500 |   |            |            |            |
| C              | 2.19043400  | 0.28503400  | -2.45426900 |   |            |            |            |
| C              | 2.51818100  | 0.45622200  | -3.80303900 |   |            |            |            |
| C              | 3.44480100  | 1.42260700  | -4.19602400 |   |            |            |            |
| H              | 2.52960100  | 0.95542700  | -0.43819500 |   |            |            |            |
| H              | 1.45624400  | -0.46020600 | -2.16185300 |   |            |            |            |
| H              | 2.04820800  | -0.16848400 | -4.55761500 |   |            |            |            |
| H              | 3.71137200  | 1.56456800  | -5.23823600 |   |            |            |            |
| O              | 4.89146700  | 3.21024200  | -3.56748800 |   |            |            |            |
| C              | 5.60572200  | 3.73875300  | -2.45028700 |   |            |            |            |
| H              | 5.72754000  | 4.81433200  | -2.60052100 |   |            |            |            |
| Pd             | 4.73405300  | 3.34481900  | -0.64903100 |   |            |            |            |
| C              | 3.88821100  | 5.55484500  | 0.04669900  |   |            |            |            |
| H              | 3.27917400  | 5.06048500  | 0.79612700  |   |            |            |            |
| H              | 4.18704900  | 6.56210500  | 0.30226500  |   |            |            |            |
| H              | 3.56230700  | 5.45595800  | -0.98352100 |   |            |            |            |
| H              | 6.58723400  | 3.25359400  | -2.37287000 |   |            |            |            |
| I              | 6.37144300  | 5.02348100  | 0.82354200  |   |            |            |            |
| H              | 4.98968900  | 0.99620900  | 0.16374000  |   |            |            |            |
| C              | 4.17017600  | 1.51009000  | 1.78703200  |   |            |            |            |
| O              | 4.85681100  | 0.62906500  | 1.06582800  |   |            |            |            |
| O              | 3.82892400  | 2.61278900  | 1.36369400  |   |            |            |            |
| C              | 3.85349900  | 1.02089300  | 3.17065100  |   |            |            |            |
| H              | 3.30783800  | 0.07504000  | 3.11148000  |   |            |            |            |
| <b>56-TS</b>   |             |             |             |   |            |            |            |
| C              | 3.39404000  | 2.63481900  | -3.49376400 |   |            |            |            |
| C              | 2.97991500  | 2.63664800  | -2.14042400 |   |            |            |            |
| C              | 1.69027900  | 2.16830100  | -1.85014500 |   |            |            |            |
| C              | 0.87791600  | 1.62345300  | -2.85747000 |   |            |            |            |
| C              | 1.34212800  | 1.57408300  | -4.17770700 |   |            |            |            |
| C              | 2.59641900  | 2.09250100  | -4.50901100 |   |            |            |            |
| H              | 1.33190400  | 2.19801300  | -0.82533700 |   |            |            |            |
| H              | -0.11109900 | 1.24652500  | -2.61132800 |   |            |            |            |
| H              | 0.71501700  | 1.15404000  | -4.95945100 |   |            |            |            |
| H              | 2.95453100  | 2.10138400  | -5.53364200 |   |            |            |            |
| O              | 4.61459800  | 3.13443600  | -3.78791900 |   |            |            |            |
| C              | 5.14828800  | 3.91233800  | -2.70754700 |   |            |            |            |
| H              | 4.85780800  | 4.96384800  | -2.83028900 |   |            |            |            |
| Pd             | 4.43318700  | 3.29182300  | -0.87479100 |   |            |            |            |
| C              | 4.47307600  | 5.45636100  | 0.36221700  |   |            |            |            |
| H              | 3.56390600  | 5.29764500  | -0.21096800 |   |            |            |            |
| H              | 4.37042300  | 5.28633600  | 1.42574200  |   |            |            |            |
| H              | 5.05565400  | 6.31384500  | 0.05256800  |   |            |            |            |
| H              | 6.23408700  | 3.80825300  | -2.72540100 |   |            |            |            |
| K              | 3.68986600  | -0.24963000 | -1.49364900 |   |            |            |            |
| I              | 3.34530100  | 2.06646600  | 1.55503300  |   |            |            |            |
| C              | 7.18172200  | -1.20702100 | -0.76441800 |   |            |            |            |
| O              | 5.96076400  | -0.82034900 | -0.67924800 |   |            |            |            |
| O              | 8.09976800  | -0.84922000 | 0.00912000  |   |            |            |            |
| C              | 7.50898000  | -2.16418800 | -1.91191400 |   |            |            |            |
| H              | 8.54973900  | -2.48814100 | -1.87007200 |   |            |            |            |
| H              | 6.84775200  | -3.03623000 | -1.86876000 |   |            |            |            |
| H              | 7.32463500  | -1.66079900 | -2.86794200 |   |            |            |            |
| K              | 6.68597000  | 0.81300200  | 1.42152000  |   |            |            |            |
| Br             | 6.54881900  | 4.18855900  | 0.31879900  |   |            |            |            |
| <b>57-TS</b>   |             |             |             |   |            |            |            |
| C              | 3.70826500  | 2.03377500  | -3.25064300 |   |            |            |            |
| C              | 3.15724200  | 2.33553600  | -1.98323200 |   |            |            |            |
| C              | 1.77903100  | 2.15525800  | -1.80684300 |   |            |            |            |
| C              | 0.98920400  | 1.59618900  | -2.82595700 |   |            |            |            |
| C              | 1.57689300  | 1.23841800  | -4.04525400 |   |            |            |            |
| C              | 2.93760200  | 1.46641300  | -4.27235000 |   |            |            |            |
| H              | 1.32694500  | 2.41822200  | -0.85468500 |   |            |            |            |
| H              | -0.07534300 | 1.44673200  | -2.66672900 |   |            |            |            |
| H              | 0.97000800  | 0.80401600  | -4.83506000 |   |            |            |            |
| H              | 3.39993100  | 1.23446600  | -5.22664700 |   |            |            |            |
| O              | 5.02540600  | 2.27030000  | -3.44614500 |   |            |            |            |
| C              | 5.58539200  | 3.10480400  | -2.41574900 |   |            |            |            |

|           |             |             |             |                |             |             |             |
|-----------|-------------|-------------|-------------|----------------|-------------|-------------|-------------|
| H         | 5.56542200  | 4.15159400  | -2.74227500 | O              | 9.64947200  | 5.50585600  | 0.30263700  |
| Pd        | 4.55244700  | 2.93666400  | -0.64759600 | O              | 7.75461600  | 6.56384800  | -0.27985200 |
| C         | 4.64235300  | 5.30940300  | 0.16883300  | C              | 9.55217500  | 7.87229400  | 0.63008200  |
| H         | 3.94275800  | 5.20695700  | -0.65365200 | H              | 10.45385700 | 8.06672900  | 0.03864200  |
| H         | 4.22001700  | 5.21146200  | 1.16102800  | H              | 8.85439200  | 8.70273200  | 0.51406100  |
| H         | 5.39477200  | 6.07232100  | 0.02511800  | H              | 9.86301400  | 7.79264300  | 1.67698100  |
| H         | 6.60989800  | 2.77191500  | -2.23723400 | K              | 7.56917000  | 4.02812500  | -0.80889000 |
| K         | 3.15314200  | -0.49780500 | -0.90326900 | H              | 8.17072500  | 1.16422100  | -3.96671200 |
| I         | 3.08885800  | 2.17365800  | 1.77744400  |                |             |             |             |
| C         | 6.74415700  | -0.39677500 | -0.91705200 | <b>59-TS</b>   |             |             |             |
| O         | 5.59048400  | -0.56704300 | -0.37373800 | Pd             | 8.95698700  | 1.48430000  | -1.65018500 |
| O         | 7.77294800  | -0.04012800 | -0.29889000 | C              | 6.33696900  | 1.16682500  | -2.80549300 |
| C         | 6.81701400  | -0.59974500 | -2.43043100 | C              | 4.98595200  | 1.45065300  | -3.07923700 |
| H         | 7.85154800  | -0.59763700 | -2.77709500 | C              | 4.66237500  | 2.77110200  | -3.40286200 |
| H         | 6.33562300  | -1.54300300 | -2.71151400 | C              | 5.63492800  | 3.78101600  | -3.45175800 |
| H         | 6.27222200  | 0.21479800  | -2.92231200 | C              | 6.96906300  | 3.46468400  | -3.21068700 |
| K         | 6.46695600  | 0.81141100  | 1.78657600  | C              | 7.36255600  | 2.13745500  | -2.91696900 |
| Cl        | 6.44254900  | 3.93100900  | 0.62408400  | H              | 3.62264100  | 3.01934600  | -3.60223400 |
|           |             |             |             | H              | 5.34754900  | 4.79877000  | -3.69903600 |
| <b>58</b> |             |             |             | H              | 7.73433200  | 4.23249300  | -3.29281800 |
| Pd        | 8.74133000  | 1.14805800  | -1.86628900 | O              | 6.66269500  | -0.07182500 | -2.35525700 |
| C         | 6.20035300  | 0.76516800  | -3.11992600 | C              | 7.64592200  | -0.01461100 | -1.31088800 |
| C         | 4.87284600  | 1.21280500  | -2.99391400 | H              | 7.14088600  | 0.16241200  | -0.35170400 |
| C         | 4.59933600  | 2.52615000  | -3.38894100 | H              | 8.17300200  | -0.96957800 | -1.28923700 |
| C         | 5.59407900  | 3.37447500  | -3.90503100 | C              | 3.94705300  | 0.36407900  | -2.97082100 |
| C         | 6.89697800  | 2.90651600  | -4.04952700 | H              | 2.93957000  | 0.76213100  | -3.11902400 |
| C         | 7.20514600  | 1.59131200  | -3.65562900 | H              | 4.11962100  | -0.41976200 | -3.71662300 |
| H         | 3.58350800  | 2.89982300  | -3.28455800 | H              | 3.99206000  | -0.12530300 | -1.99231300 |
| H         | 5.33590900  | 4.38416500  | -4.21056100 | C              | 10.40275800 | 2.96533000  | -3.76882000 |
| H         | 7.68715000  | 3.51423800  | -4.47612000 | O              | 9.52089400  | 2.34396800  | -4.44253600 |
| O         | 6.53439600  | -0.49227000 | -2.69196900 | O              | 10.41083100 | 3.04405400  | -2.50101900 |
| C         | 7.48452800  | -0.43360900 | -1.62044700 | C              | 11.51917100 | 3.64985700  | -4.53045900 |
| H         | 6.95574700  | -0.24600400 | -0.67934400 | H              | 12.46713800 | 3.16078000  | -4.28410400 |
| H         | 8.02859400  | -1.37872000 | -1.59740700 | H              | 11.35081500 | 3.59743800  | -5.60583000 |
| C         | 3.81971800  | 0.29569600  | -2.42777800 | H              | 11.59036100 | 4.69519300  | -4.21419300 |
| H         | 2.87389600  | 0.82308300  | -2.27946500 | H              | 8.54542400  | 1.99729700  | -3.63749600 |
| H         | 3.63896500  | -0.55148100 | -3.09811000 | K              | 11.29160300 | 4.19698000  | -0.32158200 |
| H         | 4.14052400  | -0.12729800 | -1.47080200 | I              | 10.42432800 | 0.87184600  | 0.59293100  |
| C         | 10.26929400 | 3.30670600  | -3.33142100 | C              | 8.30408900  | 6.25011700  | 0.52732100  |
| O         | 9.99777400  | 2.63015100  | -4.32502800 | O              | 9.16936300  | 5.33434500  | 0.28781800  |
| O         | 9.94237300  | 3.00624100  | -2.10156500 | O              | 7.06831000  | 6.06059300  | 0.61636200  |
| C         | 11.05080100 | 4.61567400  | -3.47124600 | C              | 8.85130600  | 7.66723700  | 0.70922200  |
| H         | 12.10750000 | 4.43614600  | -3.23295000 | H              | 9.36332300  | 7.98212700  | -0.20703800 |
| H         | 11.00125600 | 4.97813400  | -4.49911400 | H              | 8.05112600  | 8.37221300  | 0.93844800  |
| H         | 10.66695400 | 5.37575900  | -2.78307700 | H              | 9.59226900  | 7.67534200  | 1.51582300  |
| K         | 11.38517000 | 3.76322300  | 0.06432100  | K              | 7.12725800  | 3.49871000  | 0.18686300  |
| I         | 9.75693800  | 0.66099800  | 0.60346900  |                |             |             |             |
| C         | 8.92157800  | 6.55384300  | 0.18015300  | <b>59-TS-a</b> |             |             |             |

|                |             |             |             |                |             |             |             |
|----------------|-------------|-------------|-------------|----------------|-------------|-------------|-------------|
| Pd             | 8.88389800  | 1.61605100  | -1.60669400 | O              | 6.64267500  | -0.12264100 | -2.34736300 |
| C              | 6.27575500  | 1.14481300  | -2.72329000 | C              | 7.58426600  | -0.00546800 | -1.27734500 |
| C              | 4.94456600  | 1.33216300  | -3.13312700 | H              | 7.06647700  | 0.28694700  | -0.35550800 |
| C              | 4.59939000  | 2.59897900  | -3.60607300 | H              | 8.09205900  | -0.96369900 | -1.16859700 |
| C              | 5.52557200  | 3.65140700  | -3.65508200 | C              | 3.97744000  | 0.16707400  | -3.20667900 |
| C              | 6.84027200  | 3.43045300  | -3.26684400 | H              | 2.98028800  | 0.50134700  | -3.50654300 |
| C              | 7.26952300  | 2.14958400  | -2.84607700 | H              | 4.27841000  | -0.65379500 | -3.86708300 |
| H              | 3.57340300  | 2.77496400  | -3.92070900 | H              | 3.91647300  | -0.25325800 | -2.19715200 |
| H              | 5.21505700  | 4.62776800  | -4.01506300 | C              | 10.31507400 | 3.02816500  | -3.77018800 |
| H              | 7.57598100  | 4.22514300  | -3.35581800 | O              | 9.46310200  | 2.35476900  | -4.42938500 |
| O              | 6.61381300  | -0.03069000 | -2.13348000 | O              | 10.28835600 | 3.17265500  | -2.50755800 |
| C              | 7.58454500  | 0.17018600  | -1.10014500 | C              | 11.44626800 | 3.67484300  | -4.54158800 |
| H              | 7.07730800  | 0.51118600  | -0.18564400 | H              | 12.35835700 | 3.09374000  | -4.36816100 |
| H              | 8.09439000  | -0.78293400 | -0.93488900 | H              | 11.23174200 | 3.69077100  | -5.61014100 |
| C              | 3.94549300  | 0.21154300  | -3.00272500 | H              | 11.62146700 | 4.68903500  | -4.17257300 |
| H              | 2.94810900  | 0.53267100  | -3.31492200 | H              | 8.49654000  | 1.99721000  | -3.62918200 |
| H              | 4.23587600  | -0.65057100 | -3.61335900 | I              | 10.68765800 | 0.59204100  | 0.28850400  |
| H              | 3.88970300  | -0.14369600 | -1.96821700 | K              | 10.66741900 | 3.92533200  | -0.13459900 |
| C              | 10.32203100 | 2.98608100  | -3.79094300 |                |             |             |             |
| O              | 9.41961200  | 2.35330500  | -4.41975700 |                |             |             |             |
| O              | 10.37024300 | 3.09359600  | -2.52277500 | <b>59-TS-c</b> |             |             |             |
| C              | 11.40672200 | 3.66756200  | -4.59912700 | Pd             | 8.87667400  | 1.64242700  | -1.55154500 |
| H              | 12.38780500 | 3.36379800  | -4.22275400 | C              | 6.28900700  | 1.13268400  | -2.70664200 |
| H              | 11.31818500 | 3.42297800  | -5.65731200 | C              | 4.96370500  | 1.30124500  | -3.14498100 |
| H              | 11.32289900 | 4.75130600  | -4.46676000 | C              | 4.61462200  | 2.55667600  | -3.64388400 |
| H              | 8.43367300  | 2.01250000  | -3.57398900 | C              | 5.53221400  | 3.61668300  | -3.69122700 |
| C              | 11.08453800 | -0.04898700 | -0.27175400 | C              | 6.84106100  | 3.41385400  | -3.27291300 |
| O              | 10.31336800 | 0.99823200  | -0.11303600 | C              | 7.27445300  | 2.14534400  | -2.82190900 |
| O              | 11.44639800 | -0.74690100 | 0.68697100  | H              | 3.59329800  | 2.71709400  | -3.98189600 |
| C              | 11.52466100 | -0.38642400 | -1.68735700 | H              | 5.22026000  | 4.58433300  | -4.07359300 |
| H              | 11.75765700 | 0.52582500  | -2.24343100 | H              | 7.57180800  | 4.21357700  | -3.35872200 |
| H              | 12.38279400 | -1.05940200 | -1.66564000 | O              | 6.62831500  | -0.03208800 | -2.10120700 |
| H              | 10.69877600 | -0.87908900 | -2.21211100 | C              | 7.59059100  | 0.18339700  | -1.05990700 |
| K              | 11.07303900 | 3.69825500  | -0.08459600 | H              | 7.07618600  | 0.52923400  | -0.15294700 |
| I              | 10.67919700 | 3.69137100  | 3.27331600  | H              | 8.10556200  | -0.76266700 | -0.88554300 |
| K              | 10.00743200 | 0.44216500  | 2.58687300  | C              | 3.97491600  | 0.17117600  | -3.01738500 |
|                |             |             |             | H              | 2.98092900  | 0.47432700  | -3.35796000 |
|                |             |             |             | H              | 4.28950900  | -0.69845600 | -3.60504800 |
|                |             |             |             | H              | 3.89998500  | -0.16675300 | -1.97820800 |
| <b>59-TS-b</b> |             |             |             | C              | 10.33969700 | 2.98131700  | -3.77288500 |
| Pd             | 8.89412000  | 1.48033500  | -1.64594000 | O              | 9.43490400  | 2.33324900  | -4.38403600 |
| C              | 6.30120000  | 1.09000200  | -2.85185000 | O              | 10.38204200 | 3.14777400  | -2.51340900 |
| C              | 4.97138900  | 1.29854500  | -3.25877100 | C              | 11.46122700 | 3.57114700  | -4.60739000 |
| C              | 4.62340300  | 2.59027800  | -3.65679600 | H              | 12.35605900 | 2.95180100  | -4.47788400 |
| C              | 5.54849700  | 3.64414700  | -3.63875600 | H              | 11.19524800 | 3.58763800  | -5.66444500 |
| C              | 6.86194700  | 3.40030300  | -3.25490400 | H              | 11.69619900 | 4.58064700  | -4.25912100 |
| C              | 7.29121300  | 2.10058400  | -2.90383800 | H              | 8.45868200  | 2.00484700  | -3.52790300 |
| H              | 3.59864700  | 2.78189100  | -3.96679300 | C              | 11.39857100 | 0.37663000  | -0.34510200 |
| H              | 5.23944300  | 4.63930200  | -3.94618700 | O              | 10.40012200 | 1.17753600  | -0.11552700 |
| H              | 7.59789800  | 4.20000900  | -3.29371800 |                |             |             |             |



|                |             |             |             |              |             |             |             |
|----------------|-------------|-------------|-------------|--------------|-------------|-------------|-------------|
| O              | 12.58536900 | 0.74196500  | -0.23431000 | H            | 5.70929000  | 4.28488200  | -4.91991300 |
| C              | 11.07097100 | -1.05051500 | -0.75651200 | H            | 7.98621100  | 3.78631500  | -4.06888600 |
| H              | 10.59635400 | -1.04303300 | -1.74303600 | O            | 6.37959400  | 0.55483400  | -1.33579900 |
| H              | 11.97654400 | -1.65703600 | -0.78976200 | C            | 7.76941100  | 0.19969600  | -1.15227400 |
| H              | 10.35276100 | -1.48250800 | -0.05371700 | H            | 7.92395900  | 0.00508300  | -0.08909900 |
| K              | 11.94238300 | 3.28812400  | -0.41676000 | H            | 7.99690000  | -0.69911700 | -1.73810300 |
|                |             |             |             | C            | 3.74603200  | 0.88815100  | -2.31727700 |
| <b>59-TS-d</b> |             |             |             | H            | 2.81783200  | 1.16729500  | -2.82371300 |
| Pd             | 8.90113200  | 1.54668800  | -1.61796200 | H            | 3.92318000  | -0.18050300 | -2.47833900 |
| C              | 6.29492000  | 1.12361600  | -2.77387900 | H            | 3.59686300  | 1.01375500  | -1.23760700 |
| C              | 4.93416100  | 1.36868100  | -3.03772700 | C            | 10.74889400 | 2.94341500  | -4.01961300 |
| C              | 4.57542400  | 2.67324000  | -3.39070400 | O            | 10.20883400 | 1.93366600  | -4.67728300 |
| C              | 5.52333900  | 3.70421200  | -3.47783000 | O            | 10.43411900 | 3.23613100  | -2.86159100 |
| C              | 6.86833100  | 3.42632600  | -3.24428900 | C            | 11.79652800 | 3.68165500  | -4.80049300 |
| C              | 7.29505800  | 2.11645400  | -2.91963000 | H            | 12.71629300 | 3.08686100  | -4.78795600 |
| H              | 3.52799200  | 2.89123100  | -3.58536600 | H            | 11.48786600 | 3.79864400  | -5.84117400 |
| H              | 5.21063200  | 4.70793400  | -3.75046100 | H            | 11.99011100 | 4.65162900  | -4.34291300 |
| H              | 7.61241000  | 4.21152100  | -3.34944100 | H            | 9.54987300  | 1.49213000  | -4.08165200 |
| O              | 6.65506600  | -0.09323400 | -2.29005000 | K            | 10.81401100 | 4.19641500  | -0.31153100 |
| C              | 7.62640200  | 0.02374500  | -1.23899000 | I            | 11.25209400 | 0.73837800  | -0.35652100 |
| H              | 7.10548000  | 0.20119100  | -0.28800200 | C            | 7.82478300  | 6.08110300  | 0.79502000  |
| H              | 8.18670100  | -0.91132300 | -1.18865200 | O            | 8.64747100  | 5.17958200  | 0.39757400  |
| C              | 3.92269700  | 0.26055300  | -2.89231800 | O            | 6.58125100  | 5.94362000  | 0.84519500  |
| H              | 2.90275000  | 0.63544000  | -3.01278700 | C            | 8.44178700  | 7.41163900  | 1.23263100  |
| H              | 4.08993900  | -0.52266700 | -3.63998500 | H            | 9.01683400  | 7.84065800  | 0.40429900  |
| H              | 4.00832800  | -0.22347300 | -1.91403200 | H            | 7.67279100  | 8.11869600  | 1.54659500  |
| C              | 10.32793200 | 2.98535400  | -3.77770900 | H            | 9.13945000  | 7.23851000  | 2.05946200  |
| O              | 9.45154800  | 2.34283600  | -4.43680100 | K            | 6.50146400  | 3.52939100  | -0.12924800 |
| O              | 10.35412700 | 3.06437700  | -2.50860800 |              |             |             |             |
| C              | 11.39445000 | 3.72556800  | -4.55780700 | <b>61-TS</b> |             |             |             |
| H              | 12.38056300 | 3.49738800  | -4.14324000 | Pd           | 2.68994900  | 0.56641500  | 2.06112500  |
| H              | 11.36201800 | 3.45862400  | -5.61391000 | C            | 1.91721500  | 2.91976500  | 0.35694700  |
| H              | 11.22410500 | 4.80274800  | -4.45330400 | C            | 1.70549800  | 1.54154900  | 0.50315200  |
| H              | 8.47834600  | 1.98695100  | -3.62083800 | C            | 0.43141900  | 1.02559600  | 0.20861200  |
| K              | 11.39180500 | 4.31893500  | -0.45640200 | C            | -0.59790900 | 1.96253900  | -0.00239700 |
| I              | 8.70704700  | 6.31355200  | 0.09505500  | C            | -0.35513200 | 3.34579900  | 0.00577900  |
| K              | 6.89875400  | 3.49568100  | 0.06719100  | C            | 0.94090500  | 3.88127600  | 0.15780700  |
| I              | 10.28907200 | 1.12769500  | 0.71393500  | H            | 0.22752100  | -0.03960400 | 0.19798000  |
|                |             |             |             | H            | -1.61071800 | 1.60713400  | -0.17398600 |
| <b>60</b>      |             |             |             | H            | -1.18313100 | 4.03172500  | -0.15211300 |
| Pd             | 9.03992300  | 1.61052600  | -1.83569500 | O            | 3.30010300  | 3.02378400  | 0.32972400  |
| C              | 6.20732100  | 1.46315500  | -2.34032500 | C            | 3.48484100  | 1.57448000  | 0.20392600  |
| C              | 4.90887400  | 1.70804900  | -2.81693700 | H            | 3.54594000  | 1.28363800  | -0.84517400 |
| C              | 4.76069100  | 2.74190500  | -3.75171500 | H            | 4.39854100  | 1.25529200  | 0.72922700  |
| C              | 5.85671600  | 3.48448700  | -4.19996200 | K            | 3.76249600  | 3.49145700  | 3.26285100  |
| C              | 7.14169400  | 3.19631000  | -3.72162900 | I            | 2.66446600  | 0.14874800  | 4.74977500  |
| C              | 7.34035800  | 2.18556100  | -2.77114400 | C            | 0.54854300  | 5.33213700  | 3.75004400  |
| H              | 3.76702600  | 2.96110800  | -4.13521600 | O            | 1.58599900  | 4.62396000  | 3.48726800  |

|              |             |             |             |           |             |             |             |
|--------------|-------------|-------------|-------------|-----------|-------------|-------------|-------------|
| O            | -0.61280800 | 4.87950300  | 3.87280100  | C         | 1.60505200  | -4.11419300 | 1.37342600  |
| C            | 0.76684800  | 6.84046400  | 3.87844200  | C         | 1.63417100  | -3.52473900 | 2.64689100  |
| H            | -0.08253400 | 7.31538900  | 4.37206800  | H         | 1.11224300  | -1.85218000 | 3.90522300  |
| H            | 1.69010800  | 7.05163000  | 4.42596100  | H         | 2.10584300  | -4.06939800 | 3.46094900  |
| H            | 0.87218000  | 7.27190700  | 2.87596600  | C         | -0.26727100 | -2.55627400 | -1.03121800 |
| K            | -0.11066500 | 2.36192200  | 3.46344000  | H         | -1.28431800 | -2.80508500 | -0.73321100 |
| C            | 1.25934600  | 5.34995600  | 0.11995200  | H         | -0.24046800 | -2.15572600 | -2.04899300 |
| H            | 2.06792900  | 5.56407800  | -0.58760700 | I         | 1.10368100  | 2.24428600  | -1.27048900 |
| H            | 0.38406100  | 5.93892500  | -0.16582100 | C         | 2.40447300  | -0.83177100 | -1.23218400 |
| H            | 1.58437700  | 5.67480800  | 1.11441000  | H         | 2.41124900  | -1.90863200 | -1.40844200 |
| <b>62</b>    |             |             |             | H         | 2.68243300  | -0.27243100 | -2.12350600 |
| Pd           | 1.56419700  | 0.58983000  | 2.08115500  | H         | 3.02542600  | -0.55296500 | -0.38062100 |
| C            | 2.03073000  | 2.90990500  | 0.23046200  | O         | 0.64606600  | -3.64882100 | -0.88319200 |
| C            | 2.01110700  | 1.49996000  | 0.16204100  | K         | -2.58487900 | -1.29553300 | 2.74879500  |
| C            | 0.78088200  | 0.81136300  | 0.00412300  | I         | -2.49440400 | 0.11301200  | -0.38326100 |
| C            | -0.37429700 | 1.66693500  | 0.01511300  | C         | -0.73468300 | 1.41858300  | 4.44917900  |
| C            | -0.28487800 | 3.05390500  | 0.10865800  | O         | -1.35940100 | 0.66934500  | 3.61100500  |
| C            | 0.95486600  | 3.76178400  | 0.19425600  | O         | -0.33656200 | 2.57816600  | 4.20989100  |
| H            | 0.69841000  | -0.21402600 | -0.34415300 | C         | -0.46645600 | 0.80749600  | 5.82638100  |
| H            | -1.35312500 | 1.21037000  | -0.10194900 | H         | 0.06289600  | 1.50872200  | 6.47259200  |
| H            | -1.19982600 | 3.64203100  | 0.07304800  | H         | -1.41404300 | 0.52032900  | 6.29567200  |
| O            | 3.42334800  | 3.06000500  | 0.12298400  | H         | 0.12991800  | -0.10498600 | 5.71196100  |
| C            | 3.50321700  | 1.59174000  | -0.15648900 | K         | -0.89071900 | 2.71115900  | 1.65235100  |
| H            | 3.77520800  | 1.44014200  | -1.20524300 | C         | 2.14557800  | -5.48408700 | 1.06353700  |
| H            | 4.21123100  | 1.09299200  | 0.50840500  | H         | 2.46790000  | -5.99660500 | 1.97349900  |
| K            | 3.49067700  | 3.38075700  | 3.12030700  | H         | 1.38969500  | -6.10151800 | 0.56638200  |
| I            | 2.18660200  | 0.32829100  | 4.71209300  | H         | 3.00354400  | -5.42369600 | 0.38457300  |
| C            | 0.55515600  | 5.59548900  | 3.86068900  | <b>64</b> |             |             |             |
| O            | 1.47966200  | 4.76121300  | 3.54909700  | C         | 3.59418500  | 2.07182400  | -3.27694500 |
| O            | -0.65697100 | 5.30435600  | 3.98286700  | C         | 3.19149100  | 2.39145200  | -1.97150500 |
| C            | 0.99184400  | 7.04770100  | 4.05504400  | C         | 1.83373100  | 2.36347800  | -1.65256100 |
| H            | 0.18752700  | 7.64453400  | 4.48749400  | C         | 0.91319300  | 1.89868300  | -2.60701300 |
| H            | 1.87986400  | 7.09411600  | 4.69285000  | C         | 1.35225400  | 1.50642600  | -3.87691500 |
| H            | 1.26625200  | 7.47243600  | 3.08215300  | C         | 2.70086300  | 1.60321600  | -4.25054700 |
| K            | -0.46774600 | 2.74500800  | 3.53882900  | H         | 1.50440700  | 2.66031900  | -0.66122700 |
| C            | 1.06727200  | 5.26088300  | 0.22391300  | H         | -0.14364700 | 1.84760800  | -2.35882000 |
| H            | 1.83885900  | 5.61386400  | -0.46920900 | H         | 0.63259500  | 1.14953800  | -4.60968100 |
| H            | 0.11964400  | 5.73256900  | -0.04976100 | O         | 4.92393400  | 2.19572400  | -3.57459000 |
| H            | 1.33567600  | 5.59611900  | 1.23138400  | C         | 5.56432700  | 3.08978200  | -2.68618900 |
| <b>63-TS</b> |             |             |             | H         | 5.33582400  | 4.13021900  | -2.92725400 |
| Pd           | 0.45619100  | -0.34751600 | -0.76060500 | Pd        | 4.82276000  | 2.72876900  | -0.79213400 |
| C            | 0.45999200  | -2.05343300 | 0.59708800  | C         | 4.23164500  | 4.69191100  | -0.62362600 |
| C            | 0.42556100  | -1.52541600 | 1.89687200  | H         | 3.48080900  | 4.93374200  | -1.37437800 |
| C            | 0.99589800  | -3.32791800 | 0.40147200  | H         | 3.82801500  | 4.73126400  | 0.38785600  |
| C            | 1.05105100  | -2.27526100 | 2.90615100  | H         | 5.13130400  | 5.29607800  | -0.72803100 |
| H            | 0.01774000  | -0.54975800 | 2.13981500  | H         | 6.62981300  | 2.87771800  | -2.66915700 |
|              |             |             |             | I         | 7.34674700  | 3.30304000  | 0.43425400  |

|              |             |             |             |                |            |             |             |
|--------------|-------------|-------------|-------------|----------------|------------|-------------|-------------|
| K            | 2.92058200  | -0.43677600 | -0.76352800 |                |            |             |             |
| I            | 3.26996500  | 1.86109100  | 1.85358700  | <b>65-TS-a</b> |            |             |             |
| C            | 6.42020800  | -0.19209800 | -0.98761100 | C              | 3.79205000 | 2.50345800  | -3.27875500 |
| O            | 5.30333900  | 0.45305600  | -0.85493900 | C              | 3.75671200 | 2.10881900  | -1.92771800 |
| O            | 6.80570300  | -1.03445400 | -0.15067700 | C              | 2.84966500 | 1.11247800  | -1.53024300 |
| C            | 7.27975900  | 0.12816000  | -2.19703300 | C              | 2.03721200 | 0.50647900  | -2.48612200 |
| H            | 7.92402400  | 0.97438200  | -1.93137300 | C              | 2.10630300 | 0.90284500  | -3.83159700 |
| H            | 7.91750500  | -0.72148900 | -2.44723800 | C              | 2.97240600 | 1.91106900  | -4.25612800 |
| H            | 6.66172000  | 0.42239400  | -3.04753500 | H              | 2.74936700 | 0.86471500  | -0.47733000 |
| K            | 6.42940500  | 0.39426000  | 2.03045000  | H              | 1.32015100 | -0.25270000 | -2.18470900 |
| C            | 3.19568400  | 1.25468400  | -5.63079100 | H              | 1.46077900 | 0.42575500  | -4.56413000 |
| H            | 3.62623100  | 2.13347500  | -6.12327000 | O              | 4.60979000 | 3.52995100  | -3.62036500 |
| H            | 3.99059300  | 0.50171400  | -5.58956000 | C              | 5.77567400 | 3.59456800  | -2.81308900 |
| H            | 2.38576600  | 0.87153000  | -6.25741100 | H              | 6.09483000 | 4.63222200  | -2.73091000 |
| <b>65-TS</b> |             |             |             | Pd             | 5.51365700 | 2.66952600  | -1.00984000 |
| C            | 3.74599900  | 2.56940000  | -3.30501300 | C              | 3.61308000 | 3.76848900  | -0.68944900 |
| C            | 3.77655400  | 2.08816200  | -1.98097800 | H              | 2.88873000 | 3.29552100  | -0.03316600 |
| C            | 2.93791000  | 1.02489300  | -1.61802900 | H              | 4.28609000 | 4.41860400  | -0.12167200 |
| C            | 2.08974900  | 0.47510100  | -2.57595900 | H              | 3.14828800 | 4.32951300  | -1.49446700 |
| C            | 2.06059300  | 0.98454700  | -3.88158500 | H              | 6.55799400 | 2.95100300  | -3.23210700 |
| C            | 2.88539400  | 2.04002000  | -4.27746500 | I              | 8.06275000 | 3.54612400  | -0.30059600 |
| H            | 2.94510100  | 0.65534800  | -0.59942800 | C              | 4.41802900 | 1.26330200  | 1.56426000  |
| H            | 1.43641500  | -0.34874100 | -2.30438100 | O              | 5.40776600 | 1.20067400  | 0.72100000  |
| H            | 1.38536200  | 0.54725800  | -4.61259000 | O              | 3.54335200 | 0.38244900  | 1.65378600  |
| O            | 4.56382400  | 3.61332400  | -3.61236800 | C              | 4.37597300 | 2.46620300  | 2.49782000  |
| C            | 5.78228500  | 3.53867700  | -2.89949600 | H              | 3.35389800 | 2.84407600  | 2.57890400  |
| H            | 6.20570600  | 4.53725200  | -2.80411400 | H              | 4.67438400 | 2.13842400  | 3.50008200  |
| Pd           | 5.53931900  | 2.62405000  | -1.06043200 | H              | 5.05292000 | 3.25552900  | 2.16596300  |
| C            | 3.65460000  | 3.71700300  | -0.69055000 | K              | 8.00092400 | 0.53765400  | 1.37413800  |
| H            | 2.90149300  | 3.22606600  | -0.08391200 | I              | 7.51090000 | -2.70204900 | 0.56636900  |
| H            | 4.32623700  | 4.30435900  | -0.05439700 | K              | 4.49102700 | -1.39746200 | -0.16178200 |
| H            | 3.24541300  | 4.33603100  | -1.48329600 | C              | 3.05178500 | 2.37819500  | -5.68580300 |
| H            | 6.46861600  | 2.83638200  | -3.38364200 | H              | 2.73957600 | 3.42482100  | -5.77350000 |
| I            | 8.30351000  | 3.05992700  | -0.69499500 | H              | 4.07978300 | 2.32635300  | -6.05856100 |
| K            | 8.31070600  | -0.28047100 | 0.72811300  | H              | 2.41346900 | 1.77337400  | -6.33454700 |
| I            | 5.13395600  | 1.14704600  | 1.44627900  |                |            |             |             |
| C            | 9.88713000  | 0.92975300  | 3.88081600  | <b>65-TS-b</b> |            |             |             |
| O            | 9.28047100  | 0.61629800  | 2.79594700  | C              | 3.59450500 | 2.72294400  | -3.19262100 |
| O            | 9.68718600  | 1.98175500  | 4.53260100  | C              | 3.67307300 | 2.16768900  | -1.89959600 |
| C            | 10.92240600 | -0.07344200 | 4.39082500  | C              | 2.89457600 | 1.04166600  | -1.59279000 |
| H            | 11.39079200 | 0.27790000  | 5.31122500  | C              | 2.05675100 | 0.50973000  | -2.56891600 |
| H            | 10.43843200 | -1.03962100 | 4.57032900  | C              | 1.97773800 | 1.09506200  | -3.84029800 |
| H            | 11.68893200 | -0.23137800 | 3.62447800  | C              | 2.74328300 | 2.21154800  | -4.18282200 |
| K            | 7.86650700  | 3.00175500  | 2.99115900  | H              | 2.94039400 | 0.60858900  | -0.60080300 |
| C            | 2.88496400  | 2.60463500  | -5.67457900 | H              | 1.45106400 | -0.36174400 | -2.33858700 |
| H            | 2.55786600  | 3.65053000  | -5.67768700 | H              | 1.31185300 | 0.66927000  | -4.58660700 |
| H            | 3.89152400  | 2.59035700  | -6.10533100 | O              | 4.35705400 | 3.82091400  | -3.44990100 |
| H            | 2.21865500  | 2.03586300  | -6.32831600 | C              | 5.59141700 | 3.75791400  | -2.76565700 |

|    |            |            |             |
|----|------------|------------|-------------|
| H  | 5.97482400 | 4.76662300 | -2.62193700 |
| Pd | 5.43132600 | 2.72777100 | -0.98138200 |
| C  | 3.49568700 | 3.70095900 | -0.51739800 |
| H  | 2.76502400 | 3.14323400 | 0.05794700  |
| H  | 4.15142900 | 4.26253700 | 0.15689500  |
| H  | 3.05808300 | 4.36022300 | -1.26109200 |
| H  | 6.29552900 | 3.10997400 | -3.29800000 |
| I  | 8.17483600 | 3.40039700 | -0.63344100 |
| C  | 2.69345300 | 2.85666100 | -5.54380200 |
| H  | 2.32642300 | 3.88731300 | -5.47990400 |
| H  | 3.69125500 | 2.90699300 | -5.99218400 |
| H  | 2.03701000 | 2.30066800 | -6.21841600 |
| K  | 8.35193800 | 1.21367500 | 1.88210600  |
| I  | 5.08733300 | 1.08275200 | 1.45806800  |

**65-TS-c**

|    |            |             |             |
|----|------------|-------------|-------------|
| C  | 3.67950300 | 2.72710100  | -3.14892000 |
| C  | 3.69760500 | 2.19498600  | -1.84422400 |
| C  | 2.99894700 | 1.01841700  | -1.55245600 |
| C  | 2.30538300 | 0.37307100  | -2.58045800 |
| C  | 2.29030400 | 0.91464400  | -3.87286400 |
| C  | 2.97016900 | 2.09828200  | -4.18541600 |
| H  | 3.02318100 | 0.61125200  | -0.54927900 |
| H  | 1.76128500 | -0.54301800 | -2.36944800 |
| H  | 1.73773900 | 0.40795700  | -4.66011500 |
| O  | 4.36514700 | 3.86906600  | -3.38250000 |
| C  | 5.53226800 | 3.98918800  | -2.54134100 |
| H  | 5.64847400 | 5.03975300  | -2.26482900 |
| Pd | 5.36631500 | 2.82611200  | -0.84772600 |
| C  | 3.40589900 | 3.69300100  | -0.43393000 |
| H  | 2.78347400 | 3.07034200  | 0.20039600  |
| H  | 4.01883200 | 4.36502500  | 0.18144400  |
| H  | 2.85335400 | 4.26589700  | -1.17293300 |
| H  | 6.40052800 | 3.64181400  | -3.10512000 |
| I  | 8.11933200 | 2.47785300  | -0.80928200 |
| C  | 5.21736600 | 0.48484400  | 1.12443500  |
| O  | 5.34995800 | -0.33686400 | 0.18705600  |
| O  | 5.07422600 | 1.75007900  | 0.99392400  |
| C  | 2.96998200 | 2.70145200  | -5.56657700 |
| H  | 2.42198000 | 3.65044900  | -5.58083200 |
| H  | 3.98906100 | 2.92789100  | -5.89667100 |
| H  | 2.50494300 | 2.02878000  | -6.29227800 |
| C  | 5.24145600 | -0.01993100 | 2.56086100  |
| H  | 4.89832800 | -1.05551300 | 2.60743700  |
| H  | 6.27711300 | 0.01716100  | 2.91692900  |
| H  | 4.63989500 | 0.61771500  | 3.21152400  |
| K  | 6.12304400 | -0.18742500 | -2.18027400 |

**65-TS-d**

|    |            |             |             |
|----|------------|-------------|-------------|
| C  | 3.75372900 | 2.57335600  | -3.29585500 |
| C  | 3.78962400 | 2.09681100  | -1.97038900 |
| C  | 2.96294200 | 1.02648400  | -1.60179600 |
| C  | 2.12177600 | 0.46242500  | -2.55788100 |
| C  | 2.08791000 | 0.96556400  | -3.86579300 |
| C  | 2.90004400 | 2.02934600  | -4.26626800 |
| H  | 2.97180400 | 0.66283700  | -0.58101000 |
| H  | 1.47696300 | -0.36686800 | -2.28267300 |
| H  | 1.41818800 | 0.51713700  | -4.59502000 |
| O  | 4.55834200 | 3.62681200  | -3.60596300 |
| C  | 5.77669800 | 3.57128400  | -2.89184000 |
| H  | 6.18567700 | 4.57600400  | -2.79653200 |
| Pd | 5.54267000 | 2.65933800  | -1.04962200 |
| C  | 3.64940600 | 3.73353400  | -0.68248500 |
| H  | 2.90523500 | 3.23475700  | -0.07123300 |
| H  | 4.31440600 | 4.33533100  | -0.05266600 |
| H  | 3.22910700 | 4.34032500  | -1.47878700 |
| H  | 6.47407700 | 2.87915400  | -3.37456200 |
| I  | 8.30845200 | 3.05748400  | -0.69057400 |
| K  | 8.14147200 | -0.51336700 | 0.30904400  |
| I  | 5.17444700 | 1.18390600  | 1.45817400  |
| K  | 7.95218600 | 2.88943400  | 2.92415700  |
| C  | 2.89256700 | 2.58799800  | -5.66571200 |
| H  | 2.55058500 | 3.62907100  | -5.67312200 |
| H  | 3.89947800 | 2.58618300  | -6.09582600 |
| H  | 2.23473900 | 2.00718400  | -6.31734800 |
| I  | 9.86720500 | 0.11440400  | 3.13803700  |

**66**

|    |            |             |             |
|----|------------|-------------|-------------|
| C  | 3.54262300 | 2.87481000  | -2.79949500 |
| C  | 2.72072400 | 3.00253600  | -1.65068800 |
| C  | 1.98760900 | 1.88341400  | -1.24744900 |
| C  | 2.05299400 | 0.68946200  | -1.96379700 |
| C  | 2.84258100 | 0.58889300  | -3.10890000 |
| C  | 3.59722100 | 1.67565200  | -3.55664900 |
| H  | 1.36366200 | 1.95142800  | -0.36129500 |
| H  | 1.48607600 | -0.17166000 | -1.62483100 |
| H  | 2.87666400 | -0.34334100 | -3.66471500 |
| O  | 4.14386900 | 4.03451600  | -3.32420400 |
| C  | 5.47729400 | 4.10048700  | -2.82517900 |
| H  | 5.63773000 | 5.02473000  | -2.26370600 |
| Pd | 5.58212200 | 2.50350000  | -1.58605600 |
| C  | 2.58686200 | 4.33795800  | -0.96174100 |
| H  | 1.99143800 | 4.24496400  | -0.05013100 |
| H  | 3.55952900 | 4.75983800  | -0.69661400 |
| H  | 2.09660400 | 5.06020800  | -1.62409200 |
| H  | 6.20967900 | 3.96552000  | -3.62727500 |

|              |             |             |             |                |            |             |             |
|--------------|-------------|-------------|-------------|----------------|------------|-------------|-------------|
| I            | 8.11026900  | 3.25636500  | -0.91591400 | H              | 4.10871500 | 1.60562700  | -5.99175700 |
| K            | 8.76062100  | -0.28839900 | -0.28971600 | H              | 2.42956000 | 1.61035300  | -6.57405600 |
| I            | 5.26111600  | 0.09395000  | 0.00533300  |                |            |             |             |
| C            | 9.59602400  | 0.52933200  | 3.24709300  | <b>67-TS-a</b> |            |             |             |
| O            | 9.16681000  | 0.27317000  | 2.06664300  | C              | 4.62942500 | 1.81813600  | -3.16642700 |
| O            | 9.02646500  | 1.29011700  | 4.06474400  | C              | 4.03178300 | 1.80804200  | -1.88898500 |
| C            | 10.90196600 | -0.15351000 | 3.65497300  | C              | 3.23524100 | 0.70813300  | -1.54366700 |
| H            | 11.17824400 | 0.10466200  | 4.67819800  | C              | 3.06913200 | -0.34754400 | -2.44544600 |
| H            | 10.79338600 | -1.23955900 | 3.56430800  | C              | 3.67394500 | -0.30089200 | -3.70669600 |
| H            | 11.70207500 | 0.15152800  | 2.97156400  | C              | 4.46452400 | 0.78426800  | -4.10315600 |
| K            | 7.05758000  | 2.01302900  | 2.53868700  | H              | 2.77154300 | 0.65612500  | -0.56412800 |
| C            | 4.38714900  | 1.63111900  | -4.84093900 | H              | 2.47388100 | -1.21181200 | -2.16516500 |
| H            | 4.08524600  | 2.45003700  | -5.50188800 | H              | 3.52756800 | -1.12233600 | -4.40381300 |
| H            | 5.46007600  | 1.74608400  | -4.66023400 | O              | 5.48939300 | 2.84280400  | -3.44842300 |
| H            | 4.23080000  | 0.68240200  | -5.36000700 | C              | 5.25246000 | 3.96882900  | -2.58043300 |
|              |             |             |             | H              | 4.45985000 | 4.59240200  | -3.01562200 |
| <b>67-TS</b> |             |             |             | Pd             | 4.51270600 | 3.41855900  | -0.74427500 |
| C            | 3.42145400  | 2.67839300  | -3.46136000 | C              | 4.15274600 | 5.53883100  | 0.29824900  |
| C            | 3.02421400  | 2.68506700  | -2.10708700 | H              | 3.79157600 | 5.33295600  | 1.29874800  |
| C            | 1.75001800  | 2.18986700  | -1.79174800 | H              | 4.63738600 | 6.49630400  | 0.15378700  |
| C            | 0.94968100  | 1.61119200  | -2.78774100 | H              | 3.42618000 | 5.31494400  | -0.49006200 |
| C            | 1.40882600  | 1.55251100  | -4.11013900 | H              | 6.18626500 | 4.53221600  | -2.52243600 |
| C            | 2.64330600  | 2.09914800  | -4.48103800 | I              | 6.54551100 | 4.55347700  | 0.75870200  |
| H            | 1.39954000  | 2.22465200  | -0.76468100 | C              | 5.12070500 | 0.86606900  | -5.45826900 |
| H            | -0.02867000 | 1.21132300  | -2.53424900 | H              | 4.81451400 | 1.77444400  | -5.98805100 |
| H            | 0.78544400  | 1.10126100  | -4.87872200 | H              | 6.21360700 | 0.91160500  | -5.37607600 |
| O            | 4.62036300  | 3.22153800  | -3.77575800 | H              | 4.86210300 | 0.00121700  | -6.07521000 |
| C            | 5.12485400  | 4.04447200  | -2.71331900 | C              | 2.41896800 | 2.37540200  | 1.42968900  |
| H            | 4.77891100  | 5.07683700  | -2.85253000 | O              | 3.63809500 | 2.69921000  | 1.11859000  |
| Pd           | 4.46325900  | 3.41498700  | -0.85971800 | O              | 2.16132500 | 1.59732000  | 2.36459800  |
| C            | 4.29930300  | 5.60586200  | 0.37184800  | C              | 1.29847700 | 2.99630800  | 0.60693600  |
| H            | 3.52306800  | 5.45887200  | -0.37282900 | H              | 1.40566500 | 2.70367700  | -0.44226800 |
| H            | 4.04468500  | 5.28769500  | 1.37540100  | H              | 0.32621700 | 2.67801100  | 0.98354900  |
| H            | 4.82457300  | 6.54703500  | 0.27707500  | H              | 1.37073300 | 4.08822200  | 0.64845900  |
| H            | 6.21425200  | 3.99773000  | -2.74943900 | K              | 6.95254700 | 1.03562700  | -1.34774300 |
| I            | 6.70763400  | 4.53280700  | 0.40361300  | I              | 7.48886500 | -0.52143300 | 1.54475300  |
| K            | 3.72206700  | -0.21483500 | -1.51341000 | K              | 4.79181400 | 1.09509700  | 2.87211100  |
| I            | 3.47819600  | 2.08403000  | 1.56332900  |                |            |             |             |
| C            | 7.18560600  | -1.32341600 | -0.81949700 | <b>67-TS-b</b> |            |             |             |
| O            | 5.98722800  | -0.86859300 | -0.75022600 | C              | 4.98357700 | 1.80154300  | -3.13313700 |
| O            | 8.11974000  | -0.99259300 | -0.05316700 | C              | 4.19141900 | 1.78418500  | -1.96444600 |
| C            | 7.46148500  | -2.33407800 | -1.93383400 | C              | 3.33237900 | 0.68659000  | -1.77920400 |
| H            | 8.48834000  | -2.69927900 | -1.88902600 | C              | 3.34785700 | -0.38395800 | -2.68167800 |
| H            | 6.76582100  | -3.17596600 | -1.85069800 | C              | 4.18540600 | -0.34956900 | -3.80305700 |
| H            | 7.28636300  | -1.86034800 | -2.90646200 | C              | 5.00839900 | 0.74993600  | -4.06554900 |
| K            | 6.77062700  | 0.73925900  | 1.33928300  | H              | 2.66699000 | 0.66582100  | -0.92094600 |
| C            | 3.13786000  | 2.10677100  | -5.90469800 | H              | 2.69864300 | -1.24010500 | -2.51748100 |
| H            | 3.28841000  | 3.13253700  | -6.25875500 | H              | 4.18359900 | -1.18092400 | -4.50426600 |

|                |             |             |             |   |            |            |             |
|----------------|-------------|-------------|-------------|---|------------|------------|-------------|
| O              | 5.78288600  | 2.88129900  | -3.33212300 | K | 6.07320600 | 0.71839900 | -0.60480300 |
| C              | 5.33266900  | 3.99326300  | -2.56402400 |   |            |            |             |
| H              | 4.49524900  | 4.48892700  | -3.07364600 |   |            |            |             |
| Pd             | 4.51061600  | 3.41520500  | -0.74832100 |   |            |            |             |
| C              | 4.11298700  | 5.57604900  | 0.23387000  |   |            |            |             |
| H              | 3.85063300  | 5.55524400  | 1.28461300  |   |            |            |             |
| H              | 4.53645100  | 6.50141900  | -0.13849700 |   |            |            |             |
| H              | 3.32010700  | 5.17757400  | -0.41183800 |   |            |            |             |
| H              | 6.17636500  | 4.67158800  | -2.43580000 |   |            |            |             |
| I              | 6.52648100  | 4.70948000  | 0.69909800  |   |            |            |             |
| C              | 5.88139200  | 0.84187600  | -5.29086700 |   |            |            |             |
| H              | 5.62046800  | 1.72010400  | -5.89153000 |   |            |            |             |
| H              | 6.93770400  | 0.95582900  | -5.02082200 |   |            |            |             |
| H              | 5.77964800  | -0.04841800 | -5.91769100 |   |            |            |             |
| K              | 5.83994900  | 0.63724200  | 0.26847200  |   |            |            |             |
| I              | 3.20071500  | 2.32879300  | 1.63265600  |   |            |            |             |
| <b>67-TS-c</b> |             |             |             |   |            |            |             |
| C              | 4.40656100  | 1.89020200  | -3.11524700 |   |            |            |             |
| C              | 3.73412100  | 2.06357200  | -1.88880200 |   |            |            |             |
| C              | 2.67355100  | 1.20418300  | -1.57739200 |   |            |            |             |
| C              | 2.33490000  | 0.17025300  | -2.45668000 |   |            |            |             |
| C              | 3.03454500  | 0.01139000  | -3.65996000 |   |            |            |             |
| C              | 4.07855700  | 0.86959500  | -4.02457800 |   |            |            |             |
| H              | 2.14449500  | 1.33396600  | -0.63849500 |   |            |            |             |
| H              | 1.52710500  | -0.51326400 | -2.20927400 |   |            |            |             |
| H              | 2.75711100  | -0.78993400 | -4.34125100 |   |            |            |             |
| O              | 5.46069700  | 2.70942900  | -3.37471200 |   |            |            |             |
| C              | 5.40669400  | 3.89651200  | -2.54476100 |   |            |            |             |
| H              | 4.78652700  | 4.64889800  | -3.05056100 |   |            |            |             |
| Pd             | 4.51423000  | 3.52153400  | -0.72110700 |   |            |            |             |
| C              | 4.18001800  | 5.66061900  | 0.30581200  |   |            |            |             |
| H              | 3.71957300  | 5.31501900  | 1.22425600  |   |            |            |             |
| H              | 4.69501800  | 6.61137400  | 0.34840500  |   |            |            |             |
| H              | 3.56470500  | 5.55465100  | -0.59048200 |   |            |            |             |
| H              | 6.43098800  | 4.26233400  | -2.45193100 |   |            |            |             |
| I              | 6.58188200  | 4.64946300  | 0.75800000  |   |            |            |             |
| C              | 3.74449100  | 1.90705000  | 1.73394500  |   |            |            |             |
| O              | 4.64180300  | 1.09183400  | 1.41627000  |   |            |            |             |
| O              | 3.40139500  | 2.94854800  | 1.07208700  |   |            |            |             |
| C              | 2.97846000  | 1.66193800  | 3.03023400  |   |            |            |             |
| H              | 2.62045200  | 0.62846600  | 3.05186000  |   |            |            |             |
| H              | 3.66585400  | 1.78494900  | 3.87384400  |   |            |            |             |
| H              | 2.14130700  | 2.35230800  | 3.14232400  |   |            |            |             |
| C              | 4.82716800  | 0.74085800  | -5.32696800 |   |            |            |             |
| H              | 4.75720500  | 1.66508800  | -5.91087700 |   |            |            |             |
| H              | 5.89679800  | 0.56322600  | -5.16161700 |   |            |            |             |
| H              | 4.43310100  | -0.08079200 | -5.93178900 |   |            |            |             |
| <b>67-TS-d</b> |             |             |             |   |            |            |             |
| C              | 3.78703300  | 2.73948300  | -3.59494600 |   |            |            |             |
| C              | 3.29510500  | 2.54144400  | -2.28563100 |   |            |            |             |
| C              | 2.18793400  | 1.69391500  | -2.12998100 |   |            |            |             |
| C              | 1.64989300  | 1.03221700  | -3.23857700 |   |            |            |             |
| C              | 2.18321700  | 1.23427700  | -4.51626400 |   |            |            |             |
| C              | 3.25890200  | 2.10332200  | -4.72942600 |   |            |            |             |
| H              | 1.76952300  | 1.53124600  | -1.14316500 |   |            |            |             |
| H              | 0.81134000  | 0.35404000  | -3.10662600 |   |            |            |             |
| H              | 1.74795500  | 0.72117300  | -5.37046800 |   |            |            |             |
| O              | 4.88800900  | 3.53960800  | -3.73513000 |   |            |            |             |
| C              | 4.98314400  | 4.44463600  | -2.63063300 |   |            |            |             |
| H              | 4.29220800  | 5.28415800  | -2.78019600 |   |            |            |             |
| Pd             | 4.34530100  | 3.57629800  | -0.85522200 |   |            |            |             |
| C              | 4.55718000  | 5.56866800  | 0.53175400  |   |            |            |             |
| H              | 4.48119200  | 5.41350300  | 1.60070900  |   |            |            |             |
| H              | 5.11041500  | 6.44315700  | 0.21015200  |   |            |            |             |
| H              | 3.60360400  | 5.43582300  | 0.01367700  |   |            |            |             |
| H              | 6.01498700  | 4.79451000  | -2.58007700 |   |            |            |             |
| I              | 6.76992400  | 4.17496600  | 0.41352100  |   |            |            |             |
| C              | 3.83230100  | 2.37640800  | -6.09730000 |   |            |            |             |
| H              | 3.79245000  | 3.44544600  | -6.33209000 |   |            |            |             |
| H              | 4.88818700  | 2.08652300  | -6.15949500 |   |            |            |             |
| H              | 3.28364800  | 1.83185700  | -6.87061400 |   |            |            |             |
| K              | 5.84480600  | 0.92598500  | -2.20523800 |   |            |            |             |
| I              | 7.76987400  | -0.65872700 | 0.05783000  |   |            |            |             |
| K              | 6.10347800  | 0.94197700  | 2.47344100  |   |            |            |             |
| I              | 3.15301300  | 2.30204400  | 1.44692700  |   |            |            |             |
| <b>68</b>      |             |             |             |   |            |            |             |
| Pd             | 1.84858000  | -0.03509300 | -0.66506300 |   |            |            |             |
| C              | -1.80138900 | 0.29216700  | 0.75238700  |   |            |            |             |
| C              | -2.15062800 | 1.36318300  | -0.08373800 |   |            |            |             |
| C              | -3.50465400 | 1.72192200  | -0.13290500 |   |            |            |             |
| C              | -4.46198100 | 1.04460000  | 0.62094500  |   |            |            |             |
| C              | -4.08080000 | -0.01450400 | 1.44450900  |   |            |            |             |
| C              | -2.74132900 | -0.41056100 | 1.52097400  |   |            |            |             |
| H              | -3.80372600 | 2.54833100  | -0.77216200 |   |            |            |             |
| H              | -5.50515600 | 1.34172000  | 0.56636400  |   |            |            |             |
| H              | -4.82595100 | -0.54738100 | 2.02934600  |   |            |            |             |
| O              | -0.46522300 | -0.08932600 | 0.89619500  |   |            |            |             |
| C              | 0.10540600  | -0.87768700 | -0.14795700 |   |            |            |             |
| H              | 0.32448800  | -1.87790000 | 0.23467600  |   |            |            |             |
| H              | -0.55200000 | -0.91688800 | -1.02096500 |   |            |            |             |
| C              | -1.11323200 | 2.09915000  | -0.89332000 |   |            |            |             |
| H              | -1.53871900 | 3.00559400  | -1.33225600 |   |            |            |             |

|              |             |             |             |                |             |             |             |
|--------------|-------------|-------------|-------------|----------------|-------------|-------------|-------------|
| H            | -0.73244300 | 1.47974200  | -1.71399900 | O              | 2.82213000  | 1.70020800  | -0.90428700 |
| C            | -2.29970400 | -1.55489900 | 2.40110200  | O              | 1.19443400  | 2.47055000  | 0.42440600  |
| H            | -1.69100600 | -2.27524700 | 1.84607900  | C              | 3.28365100  | 3.61416300  | 0.48099200  |
| H            | -1.68862400 | -1.20546100 | 3.24333200  | H              | 2.70309700  | 4.49168500  | 0.76850700  |
| H            | -3.16107900 | -2.08323400 | 2.81781400  | H              | 3.76617600  | 3.19981800  | 1.37398500  |
| H            | -0.24577600 | 2.36984300  | -0.28696000 | H              | 4.04607900  | 3.88551500  | -0.25323100 |
| C            | 3.08559800  | 2.14491400  | 0.20099400  | K              | 5.14585200  | 0.50066300  | -0.07380100 |
| O            | 3.78357900  | 1.38263300  | -0.52766700 | I              | 3.15209100  | -2.03261300 | -1.20246400 |
| O            | 1.86783000  | 1.84656100  | 0.47934800  | C              | 4.00392400  | 0.94221200  | 3.43553900  |
| C            | 3.66065700  | 3.40099500  | 0.80540100  | O              | 2.99591700  | 0.60576200  | 4.09535900  |
| H            | 2.97121500  | 4.23521900  | 0.64986500  | O              | 4.08540600  | 0.91568100  | 2.15360400  |
| H            | 3.76058700  | 3.24917300  | 1.88657600  | C              | 5.25115300  | 1.42398700  | 4.18050100  |
| H            | 4.63321400  | 3.63134400  | 0.36844300  | H              | 5.55847500  | 2.40309900  | 3.79760400  |
| K            | 4.87933100  | -0.84354900 | 0.45335100  | H              | 5.06849700  | 1.48830000  | 5.25396800  |
| I            | 2.53588500  | -2.24726700 | -2.03657900 | H              | 6.07800800  | 0.72834600  | 3.99655800  |
| C            | 4.28893400  | 0.98576900  | 3.40974300  | K              | 1.35810100  | 0.00226700  | 2.15620600  |
| O            | 3.48394000  | 1.81468100  | 3.90210100  |                |             |             |             |
| O            | 3.96293700  | -0.02613000 | 2.69781400  |                |             |             |             |
| C            | 5.78857500  | 1.22834200  | 3.61799900  | <b>69-TS-a</b> |             |             |             |
| H            | 6.19355900  | 1.71953600  | 2.72319600  | Pd             | 0.82022100  | -0.16554600 | -0.73136100 |
| H            | 5.96349100  | 1.88652100  | 4.47060300  | C              | -2.44496000 | -0.71236900 | -0.04729600 |
| H            | 6.32181900  | 0.28306400  | 3.75713300  | C              | -2.28600300 | 0.52519400  | -0.70380200 |
| K            | 1.28472000  | 0.80815700  | 2.86742400  | C              | -3.35180400 | 1.43920000  | -0.59806600 |
|              |             |             |             | C              | -4.51299200 | 1.14071600  | 0.10251200  |
| <b>69-TS</b> |             |             |             | C              | -4.63713300 | -0.09689700 | 0.73945200  |
| Pd           | 1.24024800  | -0.05767600 | -1.12785800 | C              | -3.60882700 | -1.03446900 | 0.67963000  |
| C            | -1.69387700 | -0.21983200 | 0.62521300  | H              | -3.25109800 | 2.40543900  | -1.08555200 |
| C            | -1.62837400 | 1.01602800  | -0.05350400 | H              | -5.31864400 | 1.86685200  | 0.15585600  |
| C            | -2.48461200 | 2.03481300  | 0.40654700  | H              | -5.54131500 | -0.33952500 | 1.29148400  |
| C            | -3.36199200 | 1.83843700  | 1.46571000  | O              | -1.47366700 | -1.68652800 | 0.00518700  |
| C            | -3.40111500 | 0.60097100  | 2.11437100  | C              | -0.45719600 | -1.72277300 | -0.95579600 |
| C            | -2.56768900 | -0.44098500 | 1.71011600  | H              | 0.11304000  | -2.63431000 | -0.76122900 |
| H            | -2.44575500 | 3.00082100  | -0.08957200 | H              | -0.86589200 | -1.72442100 | -1.97379400 |
| H            | -4.01569700 | 2.64380200  | 1.78691100  | C              | -1.03341000 | 0.94682900  | -1.41543300 |
| H            | -4.08796600 | 0.43808100  | 2.94067300  | H              | -1.12962400 | 1.99320600  | -1.72988800 |
| O            | -0.85052300 | -1.28081600 | 0.36572700  | H              | -0.84204000 | 0.41938600  | -2.35354700 |
| C            | -0.24463100 | -1.43778700 | -0.89899100 | C              | -3.70596800 | -2.36979200 | 1.37318400  |
| H            | 0.18209700  | -2.43780800 | -0.90695100 | H              | -3.58236300 | -3.19547200 | 0.66398000  |
| H            | -0.97244700 | -1.30602800 | -1.70621800 | H              | -2.91498300 | -2.48453200 | 2.12292800  |
| C            | -0.61447000 | 1.31938500  | -1.11217500 | H              | -4.67212500 | -2.48214200 | 1.87212400  |
| H            | -0.64942400 | 2.38270900  | -1.37477500 | H              | -0.18314200 | 1.54921000  | -0.46595200 |
| H            | -0.77193200 | 0.79954900  | -2.05970700 | C              | 1.53286400  | 2.55268500  | 0.24508600  |
| C            | -2.58205400 | -1.78395600 | 2.39858700  | O              | 2.21967000  | 1.60635000  | -0.25075000 |
| H            | -2.75661900 | -2.59357200 | 1.68282300  | O              | 0.26464700  | 2.55944500  | 0.26680700  |
| H            | -1.62235300 | -2.00626200 | 2.88156100  | C              | 2.26371700  | 3.74107300  | 0.83324100  |
| H            | -3.36011400 | -1.82014400 | 3.16537400  | H              | 3.01236800  | 3.39221000  | 1.55041200  |
| H            | 0.51093100  | 1.68739600  | -0.33661600 | H              | 2.79169100  | 4.26833900  | 0.03179300  |
| C            | 2.38380200  | 2.52876600  | -0.06055000 | H              | 1.56972400  | 4.42526300  | 1.32084100  |
|              |             |             |             | C              | 2.39811800  | -2.28606100 | 0.78337600  |

|                |             |             |             |                |             |             |             |
|----------------|-------------|-------------|-------------|----------------|-------------|-------------|-------------|
| O              | 2.42151400  | -1.54240000 | -0.29680800 | C              | -4.50744300 | 1.16698300  | 0.19280400  |
| O              | 2.98618900  | -3.37767000 | 0.83298700  | C              | -4.65003600 | -0.09105300 | 0.78424700  |
| C              | 1.60718100  | -1.77708400 | 1.97600800  | C              | -3.63515100 | -1.04025700 | 0.68961800  |
| H              | 0.53568100  | -1.85617600 | 1.75954000  | H              | -3.22607900 | 2.45430600  | -0.94915800 |
| H              | 1.84227500  | -2.36785800 | 2.86211800  | H              | -5.30215200 | 1.90296000  | 0.27264300  |
| H              | 1.82023600  | -0.71851500 | 2.15184500  | H              | -5.55770800 | -0.34071600 | 1.32769000  |
| K              | 4.31759400  | 0.32444700  | -1.04362600 | O              | -1.51221700 | -1.70055500 | -0.00680900 |
| I              | 5.73170500  | -1.81380900 | -3.24839900 | C              | -0.47655000 | -1.70651200 | -0.94823200 |
| K              | 3.45593300  | -3.78685300 | -1.72744300 | H              | 0.10402400  | -2.61276300 | -0.77760800 |
|                |             |             |             | H              | -0.86475400 | -1.66498400 | -1.97301100 |
|                |             |             |             | C              | -1.03094100 | 0.97689600  | -1.33652300 |
| <b>69-TS-b</b> |             |             |             | H              | -1.12520500 | 2.03012100  | -1.62859400 |
| Pd             | 0.80057000  | -0.20438200 | -0.66704100 | H              | -0.84401400 | 0.46862800  | -2.28587300 |
| C              | -2.51647300 | -0.45240900 | 0.18092700  | C              | -3.75064300 | -2.39810900 | 1.33500800  |
| C              | -2.32144900 | 0.69013000  | -0.62130100 | H              | -3.63891000 | -3.19935200 | 0.59642300  |
| C              | -3.36133800 | 1.63927500  | -0.63680100 | H              | -2.95936700 | -2.55086900 | 2.07758800  |
| C              | -4.53460500 | 1.45818900  | 0.08396800  | H              | -4.71769800 | -2.51462000 | 1.83175100  |
| C              | -4.69702900 | 0.31017100  | 0.86473800  | H              | -0.15640200 | 1.58177200  | -0.38847800 |
| C              | -3.69263600 | -0.65283100 | 0.93181100  | C              | 1.56575000  | 2.54669400  | 0.36692700  |
| H              | -3.23076900 | 2.53521900  | -1.23856300 | O              | 2.25736800  | 1.59255000  | -0.09821900 |
| H              | -5.32170000 | 2.20550400  | 0.04050900  | O              | 0.29687000  | 2.58491400  | 0.32719200  |
| H              | -5.61188100 | 0.15959800  | 1.43206700  | C              | 2.28049900  | 3.70077900  | 1.04209500  |
| O              | -1.56356500 | -1.42386200 | 0.37148700  | H              | 2.62215400  | 3.37067200  | 2.02952200  |
| C              | -0.58828500 | -1.69138000 | -0.58480800 | H              | 3.15981400  | 3.99025400  | 0.46023000  |
| H              | -0.07725400 | -2.59792500 | -0.26725800 | H              | 1.61371200  | 4.55383000  | 1.16874900  |
| H              | -1.01176700 | -1.78702900 | -1.59184600 | C              | 2.62292600  | -1.92613800 | 1.05184500  |
| C              | -1.04974300 | 0.97000700  | -1.35502600 | O              | 3.71481900  | -1.76293700 | 1.63037700  |
| H              | -1.07181400 | 1.98581500  | -1.76761900 | O              | 2.41009700  | -1.48900000 | -0.15738800 |
| H              | -0.89231000 | 0.33218300  | -2.23003500 | C              | 1.50219100  | -2.69345800 | 1.73754300  |
| C              | -3.82782200 | -1.88844200 | 1.78529500  | H              | 0.55893300  | -2.14378400 | 1.67943200  |
| H              | -3.71414800 | -2.79866000 | 1.18672700  | H              | 1.35261600  | -3.64454900 | 1.21491700  |
| H              | -3.04669500 | -1.92449300 | 2.55269900  | H              | 1.76335500  | -2.89419300 | 2.77700100  |
| H              | -4.80194000 | -1.91692300 | 2.28110300  | K              | 4.43878100  | 0.16319200  | -0.00630000 |
| H              | -0.17481500 | 1.59112400  | -0.37350400 |                |             |             |             |
| C              | 1.54169200  | 2.65566700  | 0.09901600  |                |             |             |             |
| O              | 2.21962700  | 1.79596400  | -0.53644300 | <b>69-TS-d</b> |             |             |             |
| O              | 0.28855300  | 2.56709900  | 0.29807500  | Pd             | 1.27677800  | -0.08753900 | -1.26825300 |
| C              | 2.25295400  | 3.85326800  | 0.69709800  | C              | -1.71338500 | -0.44672700 | 0.36330600  |
| H              | 2.79683400  | 3.52344800  | 1.58910200  | C              | -1.60139300 | 0.87689300  | -0.11395000 |
| H              | 2.98175100  | 4.25457400  | -0.01272200 | C              | -2.44948500 | 1.83362300  | 0.47591800  |
| H              | 1.54162000  | 4.62746000  | 0.98507700  | C              | -3.36395500 | 1.49730200  | 1.46636000  |
| K              | 4.33017200  | 0.80063000  | -1.48469800 | C              | -3.45211500 | 0.17507000  | 1.91057200  |
| I              | 2.94217900  | -1.97165600 | -0.30100300 | C              | -2.62886800 | -0.81309800 | 1.37196900  |
|                |             |             |             | H              | -2.37521900 | 2.86355100  | 0.13777100  |
|                |             |             |             | H              | -4.01031100 | 2.25948100  | 1.89090500  |
| <b>69-TS-c</b> |             |             |             | H              | -4.17182600 | -0.09674800 | 2.67808600  |
| Pd             | 0.79960000  | -0.17043000 | -0.64865500 | O              | -0.88055300 | -1.47522700 | -0.03202500 |
| C              | -2.46517600 | -0.71073700 | -0.02506100 | C              | -0.24136100 | -1.45220200 | -1.29272200 |
| C              | -2.28797600 | 0.54835800  | -0.63640700 | H              | 0.16375000  | -2.45001200 | -1.44158300 |
| C              | -3.34134500 | 1.47246300  | -0.49689300 |                |             |             |             |



|           |             |             |             |                |             |             |             |
|-----------|-------------|-------------|-------------|----------------|-------------|-------------|-------------|
| H         | -0.94506200 | -1.18270900 | -2.08656100 | C              | 0.59318300  | 2.93142100  | 3.61434100  |
| C         | -0.55262000 | 1.31249600  | -1.08939800 | H              | 0.38213900  | 2.38464700  | 4.53838700  |
| H         | -0.55619800 | 2.40393700  | -1.18531400 | H              | 1.64341200  | 2.75154800  | 3.35607900  |
| H         | -0.69764500 | 0.94744900  | -2.10828800 | H              | 0.44009300  | 4.00073000  | 3.76635200  |
| C         | -2.70288400 | -2.24862400 | 1.83298300  | K              | -1.62143800 | 1.44996100  | -0.03306200 |
| H         | -2.86730600 | -2.92598300 | 0.98905900  |                |             |             |             |
| H         | -1.77068000 | -2.57887300 | 2.30885800  | <b>71-TS</b>   |             |             |             |
| H         | -3.51243200 | -2.38454300 | 2.55454300  | C              | 2.19450800  | 0.89665800  | -0.54757300 |
| H         | 0.56332000  | 1.52687900  | -0.24072600 | C              | 2.68511800  | -0.40377500 | -0.38323700 |
| C         | 2.43106100  | 2.31746600  | 0.15625600  | C              | 3.60467400  | -0.64754800 | 0.64569500  |
| O         | 2.88271300  | 1.58694000  | -0.76918000 | C              | 4.02930600  | 0.40940200  | 1.45701800  |
| O         | 1.24481200  | 2.17534800  | 0.63544500  | C              | 3.54917600  | 1.70527200  | 1.23210900  |
| C         | 3.29626700  | 3.37955000  | 0.78794000  | C              | 2.62027000  | 1.98599500  | 0.22265800  |
| H         | 2.69131100  | 4.24180400  | 1.07326000  | H              | 4.00088600  | -1.65049200 | 0.78815900  |
| H         | 3.73720700  | 2.95233100  | 1.69738000  | H              | 4.75680800  | 0.23211000  | 2.24376600  |
| H         | 4.09444700  | 3.68382000  | 0.10730600  | H              | 3.90529400  | 2.52438400  | 1.85134600  |
| K         | 5.27855500  | 0.28052100  | -0.29928700 | O              | 1.19280000  | 1.04805100  | -1.47520300 |
| I         | 3.14181900  | -2.06471600 | -1.59508400 | C              | 1.01948000  | -0.12843600 | -2.26501000 |
| I         | 4.38428700  | 0.16260300  | 2.98127700  | H              | -0.01095000 | -0.10132400 | -2.66497900 |
| K         | 1.22024500  | -0.59876200 | 1.95139000  | H              | 1.70048200  | -0.11707800 | -3.11654100 |
|           |             |             |             | C              | 2.09423500  | -1.42636300 | -1.30152300 |
| <b>70</b> |             |             |             | H              | 1.88162900  | -2.37636400 | -0.76321800 |
| C         | 2.16045700  | 0.77976700  | -0.53656100 | H              | 2.72440900  | -1.69600100 | -2.14898300 |
| C         | 2.68469500  | -0.52175100 | -0.33411800 | C              | 2.08943500  | 3.37311300  | -0.03047900 |
| C         | 3.60960400  | -0.67761700 | 0.72327500  | H              | 2.00922100  | 3.56801200  | -1.10442000 |
| C         | 4.02370700  | 0.40129500  | 1.50068800  | H              | 1.09391100  | 3.50649200  | 0.40799200  |
| C         | 3.53466800  | 1.68245800  | 1.22170200  | H              | 2.74974300  | 4.12539800  | 0.40976400  |
| C         | 2.60267700  | 1.89480200  | 0.20457600  | Pd             | -0.10075600 | -1.68898200 | -1.16989200 |
| H         | 4.03226300  | -1.66538700 | 0.89547600  | I              | -2.34165400 | -2.41288500 | 0.18823400  |
| H         | 4.75221400  | 0.25532300  | 2.29323600  | K              | 0.51686000  | -1.27369600 | 2.20616500  |
| H         | 3.88055600  | 2.53434900  | 1.80091600  | C              | -0.24202100 | 2.33765200  | 2.43728200  |
| O         | 1.11383700  | 1.02741000  | -1.38995300 | O              | -0.83587800 | 3.12725000  | 1.66035700  |
| C         | 0.66456600  | -0.00434100 | -2.25791400 | O              | -0.23670100 | 1.06497000  | 2.31276800  |
| H         | -0.26856400 | 0.35835700  | -2.70200900 | C              | 0.58196000  | 2.91303000  | 3.58737000  |
| H         | 1.39723600  | -0.18953200 | -3.04692200 | H              | 0.36815600  | 2.37375300  | 4.51517100  |
| C         | 2.25030900  | -1.69826800 | -1.13998700 | H              | 1.64388900  | 2.76592600  | 3.35830500  |
| H         | 2.53858400  | -2.64018900 | -0.65613500 | H              | 0.38729900  | 3.97846500  | 3.71789400  |
| H         | 2.65373700  | -1.70100100 | -2.15527900 | K              | -1.57405700 | 1.30179700  | -0.07244900 |
| C         | 2.06015800  | 3.27172300  | -0.08841000 |                |             |             |             |
| H         | 1.97609200  | 3.43848200  | -1.16623000 | <b>71-TS-a</b> |             |             |             |
| H         | 1.06658500  | 3.41753800  | 0.35011700  | C              | 2.85802600  | 0.51563000  | 0.00631200  |
| H         | 2.71685400  | 4.03865300  | 0.33153700  | C              | 3.07183400  | -0.77613400 | -0.49331800 |
| Pd        | 0.18178100  | -1.72225800 | -1.25108800 | C              | 4.15886500  | -1.50840500 | -0.00382000 |
| I         | -2.32774200 | -2.23950800 | -0.12796300 | C              | 5.01532300  | -0.93536000 | 0.94118200  |
| K         | 0.61436900  | -1.13182200 | 2.15730400  | C              | 4.78776700  | 0.36863400  | 1.40127500  |
| C         | -0.27748900 | 2.40608800  | 2.47541900  | C              | 3.70219800  | 1.12898400  | 0.94520500  |
| O         | -0.85506900 | 3.22783100  | 1.72129900  | H              | 4.32842500  | -2.52040800 | -0.36086200 |
| O         | -0.32594200 | 1.13407700  | 2.33347600  | H              | 5.86668500  | -1.49707400 | 1.31327700  |

|                |             |             |             |                |             |             |             |
|----------------|-------------|-------------|-------------|----------------|-------------|-------------|-------------|
| H              | 5.46594000  | 0.80909200  | 2.12801100  | C              | 2.56973400  | 0.62624800  | -0.03626200 |
| O              | 1.69160700  | 1.11869900  | -0.35817800 | C              | 2.67402700  | -0.65739000 | -0.58536900 |
| C              | 0.96523800  | 0.36546400  | -1.33793300 | C              | 3.69714500  | -1.49989200 | -0.13415300 |
| H              | -0.10123900 | 0.60852800  | -1.18054600 | C              | 4.60049300  | -1.03345800 | 0.82972300  |
| H              | 1.24265900  | 0.69293000  | -2.33996900 | C              | 4.47722500  | 0.26612300  | 1.34134500  |
| C              | 2.00995400  | -1.26084200 | -1.42717700 | C              | 3.46041000  | 1.13385200  | 0.91911600  |
| H              | 1.78698200  | -2.33380100 | -1.24761300 | H              | 3.79677000  | -2.49919900 | -0.55058900 |
| H              | 2.26289600  | -1.16973400 | -2.48365700 | H              | 5.41567300  | -1.66937500 | 1.16366400  |
| C              | 3.41237600  | 2.52690700  | 1.42990800  | H              | 5.18778700  | 0.62272600  | 2.08179800  |
| H              | 3.48910100  | 3.24927800  | 0.61000400  | O              | 1.48521100  | 1.36114000  | -0.44420300 |
| H              | 2.39036900  | 2.61693900  | 1.81714100  | C              | 0.84130500  | 0.75177500  | -1.56693900 |
| H              | 4.11005800  | 2.82583500  | 2.21656800  | H              | -0.18876700 | 1.16183100  | -1.60622600 |
| Pd             | -0.02055700 | -1.45390200 | -0.51839000 | H              | 1.33995000  | 1.04421600  | -2.49209700 |
| I              | -1.65942400 | -2.56089900 | 1.36976900  | C              | 1.60730200  | -1.00806800 | -1.57622000 |
| K              | 1.22792300  | -0.91210800 | 2.29804100  | H              | 1.21403900  | -2.02819400 | -1.37120400 |
|                |             |             |             | H              | 1.93957800  | -1.00611600 | -2.61466800 |
|                |             |             |             | C              | 3.30091500  | 2.52697300  | 1.46427300  |
| <b>71-TS-b</b> |             |             |             | H              | 2.99935600  | 3.22360400  | 0.67654200  |
| C              | 2.87823600  | 0.49604600  | -0.00873000 | H              | 2.53597700  | 2.54442200  | 2.24967600  |
| C              | 3.09168700  | -0.79314900 | -0.50742300 | H              | 4.23382000  | 2.88001600  | 1.91116300  |
| C              | 4.21848600  | -1.49632500 | -0.07261100 | Pd             | -0.50549900 | -0.85552800 | -0.92106000 |
| C              | 5.11125500  | -0.89366400 | 0.81736400  | C              | -1.73171300 | -2.25385400 | 1.40829400  |
| C              | 4.87528400  | 0.40474600  | 1.28488100  | O              | -0.66523900 | -1.98386800 | 2.03542700  |
| C              | 3.74881700  | 1.13500000  | 0.88526700  | O              | -2.09921100 | -1.70583000 | 0.32010300  |
| H              | 4.39398300  | -2.50662100 | -0.43169700 | C              | -2.65803600 | -3.31103700 | 1.99438500  |
| H              | 5.99557900  | -1.43124700 | 1.14550800  | H              | -3.64997900 | -3.26211500 | 1.54346500  |
| H              | 5.58055600  | 0.86589800  | 1.97185800  | H              | -2.23100000 | -4.29951200 | 1.78965600  |
| O              | 1.69052400  | 1.07966000  | -0.35725600 | H              | -2.72039900 | -3.19826700 | 3.07970000  |
| C              | 1.02486200  | 0.33434600  | -1.38643800 | K              | -0.86444200 | 0.83010900  | 1.75752900  |
| H              | -0.04467500 | 0.60869400  | -1.31598000 | I              | 1.17389500  | 0.94724200  | 4.49968500  |
| H              | 1.38577200  | 0.65240800  | -2.36565700 | K              | 1.76410000  | -1.90368200 | 2.74177500  |
| C              | 2.00020100  | -1.30013800 | -1.39984000 |                |             |             |             |
| H              | 1.74261400  | -2.34834400 | -1.12311800 |                |             |             |             |
| H              | 2.25868500  | -1.31305000 | -2.45923200 | <b>71-TS-d</b> |             |             |             |
| C              | 3.45725000  | 2.53283100  | 1.36976900  | Pd             | 1.20514200  | 0.34680700  | -1.62121900 |
| H              | 3.41361700  | 3.23742000  | 0.53225600  | C              | -1.90073000 | 0.44342400  | -0.01209700 |
| H              | 2.48329300  | 2.59862500  | 1.87094000  | C              | -1.88886900 | 0.02160100  | -1.34846100 |
| H              | 4.22376800  | 2.87566900  | 2.06956700  | C              | -2.90009500 | 0.47177800  | -2.20503600 |
| Pd             | -0.09388800 | -1.43705300 | -0.66779700 | C              | -3.90714400 | 1.30761700  | -1.71177500 |
| C              | -2.02057000 | -2.33354600 | 1.52428800  | C              | -3.89983200 | 1.69750000  | -0.36536600 |
| O              | -1.77339000 | -2.34591000 | 0.27444700  | C              | -2.89575900 | 1.27870300  | 0.51847000  |
| O              | -1.32411400 | -1.78984100 | 2.42109800  | H              | -2.89471300 | 0.16668100  | -3.24792400 |
| C              | -3.29455600 | -3.05431500 | 1.96010700  | H              | -4.70348500 | 1.64583000  | -2.36800900 |
| H              | -3.03809300 | -3.83006100 | 2.68863400  | H              | -4.68903600 | 2.34327400  | 0.01164800  |
| H              | -3.95412300 | -2.34275200 | 2.46725100  | O              | -0.82080500 | 0.09691800  | 0.74132500  |
| H              | -3.81542900 | -3.50026700 | 1.11189400  | C              | 0.12727500  | -0.71041600 | 0.03499300  |
| K              | 0.82200300  | -0.55695200 | 2.18949700  | H              | 1.11718600  | -0.43216400 | 0.43243600  |
|                |             |             |             | H              | -0.04414100 | -1.76526500 | 0.24756100  |
|                |             |             |             | C              | -0.69602500 | -0.79045900 | -1.73046200 |
| <b>71-TS-c</b> |             |             |             |                |             |             |             |

|                |             |             |             |                |             |             |             |
|----------------|-------------|-------------|-------------|----------------|-------------|-------------|-------------|
| H              | -0.35970900 | -0.54391300 | -2.76139800 | I              | -2.33916500 | -2.37688300 | -0.27859900 |
| H              | -0.85379500 | -1.86877200 | -1.71004200 | C              | -1.64274200 | 3.17975700  | -0.90086400 |
| C              | -2.82145000 | 1.74225200  | 1.94924600  | O              | -0.54075900 | 3.25103500  | -1.50325900 |
| H              | -2.65485500 | 0.90057600  | 2.62897300  | O              | -2.26032400 | 2.09152600  | -0.63428600 |
| H              | -1.98059500 | 2.43223700  | 2.07818500  | C              | -2.28897000 | 4.47130800  | -0.39733800 |
| H              | -3.74112500 | 2.25287500  | 2.24724300  | H              | -2.19674300 | 4.50930800  | 0.69499800  |
| H              | 2.27539500  | 2.07728500  | 0.34470000  | H              | -1.80051600 | 5.34930000  | -0.82256700 |
| C              | 0.99094000  | 2.39900500  | 1.73462400  | H              | -3.35636300 | 4.47996400  | -0.63728300 |
| O              | 0.26322800  | 3.11822600  | 1.05645000  | K              | -0.32950700 | 0.66261300  | -1.99120500 |
| O              | 2.12852700  | 1.87077100  | 1.29927700  |                |             |             |             |
| C              | 0.66691000  | 1.98071800  | 3.14349500  | <b>71-TS-f</b> |             |             |             |
| H              | 1.57306700  | 1.78854500  | 3.71964800  | C              | 2.05008000  | 0.84470500  | -0.50862800 |
| H              | 0.05278900  | 2.74261700  | 3.62434800  | C              | 2.58176000  | -0.43611800 | -0.31021800 |
| H              | 0.08816200  | 1.05351600  | 3.07619400  | C              | 3.43986100  | -0.64441700 | 0.77753300  |
| I              | 2.85367900  | 2.43611200  | -2.26459100 | C              | 3.76100700  | 0.42635100  | 1.61871200  |
| K              | -0.54303500 | 3.12725700  | -1.43917500 | C              | 3.23018900  | 1.69785800  | 1.37291500  |
|                |             |             |             | C              | 2.36227000  | 1.94240800  | 0.30136900  |
| <b>71-TS-e</b> |             |             |             | H              | 3.86515900  | -1.63085200 | 0.94678900  |
| Pd             | 0.37317800  | -2.27084900 | -0.12173800 | H              | 4.43915400  | 0.27717200  | 2.45375400  |
| C              | 3.03195700  | 0.13348000  | -0.51483800 | H              | 3.48753300  | 2.52352300  | 2.03012400  |
| C              | 3.15458500  | -0.65747200 | 0.62926100  | O              | 1.11125200  | 0.95871300  | -1.51025200 |
| C              | 3.77517100  | -0.10560500 | 1.75228500  | C              | 1.04982400  | -0.22547000 | -2.30552400 |
| C              | 4.27089500  | 1.19891300  | 1.69953400  | H              | 0.06325700  | -0.23804100 | -2.80414800 |
| C              | 4.11448000  | 1.96622000  | 0.54007800  | H              | 1.80671800  | -0.19529300 | -3.08992200 |
| C              | 3.47331700  | 1.45681100  | -0.59502700 | C              | 2.08584600  | -1.48866500 | -1.25029800 |
| H              | 3.86641900  | -0.69401000 | 2.66114800  | H              | 1.86278700  | -2.43405000 | -0.71005500 |
| H              | 4.77597200  | 1.62253300  | 2.56255600  | H              | 2.77550200  | -1.75294000 | -2.05169600 |
| H              | 4.48817500  | 2.98689600  | 0.51421000  | C              | 1.74826000  | 3.29377800  | 0.05363300  |
| O              | 2.33045100  | -0.43143600 | -1.55880200 | H              | 1.60702400  | 3.47506300  | -1.01590500 |
| C              | 2.15297200  | -1.82690400 | -1.34849600 | H              | 0.77268100  | 3.35740100  | 0.55180100  |
| H              | 1.39825700  | -2.17274000 | -2.07423800 | H              | 2.37621900  | 4.08919300  | 0.46377400  |
| H              | 3.07995700  | -2.36491400 | -1.55712200 | Pd             | -0.10731300 | -1.77655400 | -1.24094200 |
| C              | 2.47030300  | -1.99178900 | 0.57581700  | I              | -2.39968000 | -2.48538200 | 0.01539800  |
| H              | 1.82548400  | -2.11603400 | 1.47219500  | K              | 0.28412700  | -1.11467100 | 2.24819700  |
| H              | 3.13687200  | -2.85343300 | 0.53740900  | K              | -1.85876600 | 1.11435200  | -0.61349700 |
| C              | 3.19955500  | 2.29727600  | -1.81652700 | I              | -1.09426400 | 1.95624900  | 2.56859900  |
| H              | 3.27929200  | 1.70566100  | -2.73374700 |                |             |             |             |
| H              | 2.18830900  | 2.72545700  | -1.77820800 | <b>72</b>      |             |             |             |
| H              | 3.90153500  | 3.13325900  | -1.88465700 | C              | 4.90506600  | -1.20496700 | -4.42952800 |
| H              | 0.10764000  | -0.20086600 | 0.90354900  | C              | 3.97846200  | -1.06156500 | -5.48178100 |
| C              | -0.10243700 | 1.56166700  | 1.72907700  | C              | 2.68799400  | -1.58049000 | -5.29141300 |
| O              | -1.06188800 | 1.25048200  | 2.42144500  | C              | 2.34050200  | -2.23284500 | -4.10471000 |
| O              | 0.46962100  | 0.72368400  | 0.85630200  | C              | 3.29016000  | -2.39039800 | -3.09270000 |
| C              | 0.57726400  | 2.90109700  | 1.72075100  | C              | 4.59022100  | -1.88372600 | -3.23555000 |
| H              | 1.64237100  | 2.76416000  | 1.92868100  | H              | 1.96462500  | -1.49872300 | -6.09925500 |
| H              | 0.49236300  | 3.32767500  | 0.71557400  | H              | 1.34032000  | -2.63751400 | -3.97839800 |
| H              | 0.11802300  | 3.55794500  | 2.45874700  | H              | 3.02954500  | -2.89122800 | -2.16619800 |
| K              | -3.31499900 | 0.63752500  | 1.14745100  | O              | 6.19449900  | -0.71172200 | -4.58357200 |

|    |            |             |             |    |            |             |             |
|----|------------|-------------|-------------|----|------------|-------------|-------------|
| C  | 6.34775600 | 0.70379900  | -4.54215600 | H  | 6.53203200 | 1.19020900  | -4.45515200 |
| H  | 5.48525700 | 1.23263800  | -4.95197800 | Pd | 6.55769200 | 0.61479700  | -1.97539300 |
| Pd | 6.73279900 | 0.97556400  | -2.60196100 | C  | 4.86975700 | 0.74992700  | -6.31868300 |
| C  | 4.36910200 | -0.42264600 | -6.79484400 | H  | 4.24824800 | 0.91109700  | -7.20392300 |
| H  | 3.77200400 | -0.83534700 | -7.61252500 | H  | 4.84728000 | 1.66971500  | -5.72250700 |
| H  | 4.21682800 | 0.66324200  | -6.79321000 | H  | 5.90087900 | 0.58864000  | -6.64450200 |
| H  | 5.42544400 | -0.59802900 | -7.01276100 | H  | 8.06292700 | 0.33571600  | -4.08417500 |
| H  | 7.27106800 | 0.95494700  | -5.07687600 | C  | 6.88553900 | 3.88980000  | 0.77966800  |
| C  | 6.99332100 | 3.44394000  | 1.33521000  | O  | 7.75439200 | 2.98031100  | 0.34282000  |
| O  | 7.83009000 | 2.99964800  | 0.43282400  | O  | 5.87594300 | 3.60887200  | 1.41398200  |
| O  | 6.00570600 | 2.82660500  | 1.74796700  | C  | 5.70143200 | -3.10463400 | -3.12793800 |
| C  | 5.60589000 | -2.06226300 | -2.13938400 | H  | 6.50284300 | -3.53563600 | -3.73720300 |
| H  | 6.42742200 | -2.71057000 | -2.46129300 | H  | 6.18416000 | -2.45795200 | -2.39109800 |
| H  | 6.05818400 | -1.10075200 | -1.84966100 | H  | 5.18410800 | -3.91570900 | -2.60819400 |
| H  | 5.13601600 | -2.46849000 | -1.24187300 | C  | 7.27443600 | -0.43946300 | -0.02335500 |
| C  | 8.37920400 | -0.03225600 | -0.28312300 | H  | 6.83023500 | -1.44172800 | 0.01693600  |
| H  | 8.17068000 | -1.09061500 | -0.50972400 | H  | 8.36790800 | -0.40167500 | 0.05979400  |
| H  | 8.69388500 | 0.02088900  | 0.77147500  | O  | 6.57527000 | 0.56803300  | 0.36000600  |
| O  | 7.24423900 | 0.78146200  | -0.50471300 | H  | 7.51880700 | -0.64953500 | -1.81354400 |
| H  | 9.24756400 | 0.27306600  | -0.89243100 | H  | 7.36866400 | 2.07240200  | 0.47420700  |
| H  | 7.53783700 | 2.05169500  | 0.03272700  | I  | 4.83946000 | 2.78024400  | -2.40375900 |
| I  | 5.38555500 | 3.30631400  | -2.53530300 | K  | 4.19149200 | 1.52609700  | 1.37114600  |
| K  | 4.86490400 | 0.66177900  | 0.74839300  | C  | 7.26013000 | 5.29083900  | 0.37779900  |
| C  | 7.33086500 | 4.83413200  | 1.83189300  | H  | 6.72174000 | 6.01185000  | 0.99255800  |
| H  | 6.73752800 | 5.07466500  | 2.71441400  | H  | 8.33928200 | 5.44306100  | 0.44952400  |
| H  | 8.39871100 | 4.91089400  | 2.05239200  | H  | 6.96910000 | 5.42140300  | -0.67041800 |
| H  | 7.10838900 | 5.55307700  | 1.03628000  | K  | 2.66101700 | 0.03521000  | -2.35582600 |
| K  | 2.58766100 | 1.13820700  | -2.90534100 | C  | 2.17549600 | -0.78092500 | 1.20822300  |
| C  | 2.43066700 | -1.01750000 | -0.15279800 | O  | 2.42999300 | -0.23756000 | 0.07283600  |
| O  | 2.46442500 | 0.16683500  | -0.64378000 | O  | 2.66975800 | -0.42768400 | 2.30087700  |
| O  | 3.40097600 | -1.60682500 | 0.37605100  | C  | 1.18744000 | -1.95117600 | 1.18367300  |
| C  | 1.08470800 | -1.74382700 | -0.24966000 | H  | 1.57992500 | -2.74973800 | 0.54371200  |
| H  | 0.83131300 | -1.89971100 | -1.30521900 | H  | 1.01391000 | -2.34195300 | 2.18736200  |
| H  | 1.11852800 | -2.70904900 | 0.25825100  | H  | 0.23757200 | -1.62266300 | 0.74776600  |
| H  | 0.29538100 | -1.12167600 | 0.18357400  |    |            |             |             |

### 73'-TS

|              |            |             |             |    |             |            |             |
|--------------|------------|-------------|-------------|----|-------------|------------|-------------|
| <b>73-TS</b> |            |             |             | C  | 3.03710100  | 4.66163100 | -3.58734500 |
| C            | 5.21138800 | -1.17281600 | -4.67560100 | C  | 2.76039900  | 5.45971600 | -2.46014000 |
| C            | 4.36562500 | -0.43080300 | -5.52607800 | C  | 1.43322200  | 5.52024900 | -2.01354900 |
| C            | 3.02970900 | -0.84797800 | -5.65282100 | C  | 0.40846300  | 4.85721400 | -2.68968400 |
| C            | 2.54737600 | -1.96953300 | -4.97312300 | C  | 0.70098400  | 4.12565000 | -3.84305200 |
| C            | 3.40958900 | -2.69930600 | -4.14624600 | C  | 2.01875500  | 4.01298400 | -4.31320900 |
| C            | 4.74721500 | -2.31438600 | -3.98648700 | H  | 1.20426600  | 6.11379400 | -1.13302500 |
| H            | 2.37264000 | -0.29713800 | -6.32156600 | H  | -0.61205400 | 4.92213500 | -2.32568300 |
| H            | 1.51801300 | -2.29007200 | -5.10909400 | H  | -0.09922300 | 3.64325500 | -4.39984400 |
| H            | 3.04871600 | -3.58529800 | -3.62982900 | O  | 4.32097000  | 4.56678900 | -4.10622000 |
| O            | 6.55151000 | -0.89951500 | -4.55709000 | C  | 5.33966100  | 3.95639400 | -3.34751500 |
| C            | 6.97945400 | 0.32451800  | -3.96835300 | Pd | 4.93525400  | 2.07747200 | -2.17991300 |

|                |             |             |             |                |             |             |             |
|----------------|-------------|-------------|-------------|----------------|-------------|-------------|-------------|
| C              | 3.83192300  | 6.26984500  | -1.77599600 | C              | 5.68160500  | -1.89843300 | -5.10406100 |
| H              | 3.39190300  | 7.14202000  | -1.28522700 | H              | 5.60713800  | -2.96870700 | -5.31686200 |
| H              | 4.34563300  | 5.68434200  | -1.00589800 | H              | 4.66543400  | -1.52711500 | -4.92183200 |
| H              | 4.57712100  | 6.62136700  | -2.49533600 | H              | 6.05940900  | -1.39195000 | -5.99673600 |
| C              | 3.96023700  | -0.26076200 | -0.27439400 | H              | 5.93093600  | 2.24026100  | -5.13294400 |
| O              | 2.86112100  | -0.06342500 | 0.27897500  | C              | 7.45333600  | 2.42449500  | 1.01441000  |
| O              | 4.20846600  | 0.07581700  | -1.50399000 | O              | 7.23276500  | 1.34592000  | 0.28147700  |
| C              | 2.31925900  | 3.21912700  | -5.56271500 | O              | 6.56278300  | 3.17864400  | 1.40290800  |
| H              | 3.22864900  | 3.57620400  | -6.04899200 | C              | 8.82191000  | 1.14861600  | -2.56709100 |
| H              | 2.45173900  | 2.15690000  | -5.32974700 | H              | 9.40085200  | 1.36385600  | -3.47075200 |
| H              | 1.49144100  | 3.29829500  | -6.27355900 | H              | 8.10559100  | 1.96758400  | -2.45132500 |
| C              | 5.10950200  | -0.88856500 | 0.48811500  | H              | 9.49527200  | 1.15481500  | -1.70613600 |
| H              | 4.75750200  | -1.37537000 | 1.39962300  | C              | 4.67863100  | 0.05509000  | -1.20240800 |
| H              | 5.64244500  | -1.60262300 | -0.14417800 | H              | 3.71614000  | -0.46160000 | -1.28430800 |
| H              | 5.80949800  | -0.08712100 | 0.74996400  | H              | 5.55950900  | -0.59601200 | -1.23688300 |
| C              | 4.69784100  | 1.04958900  | -4.14138000 | O              | 4.71723500  | 1.14240100  | -0.47457400 |
| H              | 4.73633900  | 1.53076600  | -5.12212900 | H              | 4.47254600  | 0.18333800  | -3.00182000 |
| H              | 4.96796300  | 2.52875100  | -3.71973100 | H              | 6.25756500  | 1.28774800  | 0.02966200  |
| H              | 5.57331900  | 0.40951900  | -3.99113600 | I              | 5.78042900  | 4.30563400  | -2.71685500 |
| O              | 3.47912000  | 0.40997300  | -3.99959700 | K              | 4.24356200  | 3.61590900  | 0.30056900  |
| H              | 3.53253300  | -0.04585400 | -3.12601600 | C              | 8.91494600  | 2.64520600  | 1.30388700  |
| K              | 1.67793800  | 1.81593400  | -1.56564500 | H              | 9.03566300  | 3.42754600  | 2.05236100  |
| I              | 5.20710400  | 3.14338800  | 0.36221500  | H              | 9.38097800  | 1.71444900  | 1.63689200  |
| H              | 6.22822500  | 3.92997700  | -3.98123700 | H              | 9.40927300  | 2.94643200  | 0.37434200  |
| H              | 5.56410400  | 4.47018600  | -2.41619700 |                |             |             |             |
| C              | -0.04055500 | 3.36452800  | 1.36365700  | <b>73-TS-b</b> |             |             |             |
| O              | 0.48866100  | 2.64600300  | 0.44483000  | C              | 7.46962900  | 1.91416700  | -5.62987600 |
| O              | 0.29923600  | 3.34943900  | 2.57035000  | C              | 7.57049600  | 1.20969800  | -6.84317800 |
| C              | -1.15212100 | 4.31807000  | 0.91925500  | C              | 8.77932300  | 0.56942900  | -7.13428100 |
| H              | -1.62999300 | 4.79469900  | 1.77648300  | C              | 9.85591600  | 0.63823500  | -6.25045900 |
| H              | -0.72147000 | 5.09024200  | 0.27157100  | C              | 9.73731100  | 1.36653300  | -5.06879800 |
| H              | -1.89588300 | 3.77532800  | 0.32717600  | C              | 8.54515000  | 2.02260100  | -4.73456800 |
| K              | 2.30676600  | 1.69798400  | 2.24266800  | H              | 8.87656000  | 0.02475800  | -8.07010000 |
|                |             |             |             | H              | 10.79069500 | 0.14027500  | -6.49185000 |
| <b>73-TS-a</b> |             |             |             | H              | 10.58294800 | 1.43891200  | -4.38897600 |
| C              | 7.23296100  | -0.41715100 | -3.74898100 | O              | 6.28683300  | 2.58888400  | -5.35414000 |
| C              | 6.58339400  | -1.64899300 | -3.92059600 | C              | 5.21422400  | 1.81170800  | -4.86228000 |
| C              | 6.80082300  | -2.64459700 | -2.95839600 | H              | 5.28527700  | 0.77758100  | -5.20322200 |
| C              | 7.64343600  | -2.42187700 | -1.87011900 | Pd             | 5.16182500  | 1.93976500  | -2.82304400 |
| C              | 8.30539800  | -1.19879300 | -1.74333500 | C              | 6.41376700  | 1.17547800  | -7.81310700 |
| C              | 8.12014400  | -0.18029700 | -2.68330200 | H              | 6.75910000  | 0.93131200  | -8.82146300 |
| H              | 6.30560700  | -3.60565000 | -3.07522600 | H              | 5.66516200  | 0.42540400  | -7.53122800 |
| H              | 7.79701300  | -3.20372600 | -1.13170900 | H              | 5.90175100  | 2.14155900  | -7.84121400 |
| H              | 8.96540100  | -1.02088000 | -0.89917400 | H              | 4.28282800  | 2.27777100  | -5.19440700 |
| O              | 7.04683300  | 0.63112000  | -4.63377100 | C              | 8.13043300  | 2.49434900  | 0.30802400  |
| C              | 5.77687200  | 1.26139400  | -4.68086400 | O              | 7.59667800  | 1.38612600  | -0.18628200 |
| H              | 5.04346500  | 0.67827900  | -5.23967200 | O              | 7.47137400  | 3.45356800  | 0.69859300  |
| Pd             | 5.09935500  | 1.61348200  | -2.75335000 | C              | 8.43105800  | 2.81193200  | -3.45442400 |

|   |             |             |             |   |             |             |             |
|---|-------------|-------------|-------------|---|-------------|-------------|-------------|
| H | 7.68817100  | 3.60721500  | -3.53081000 | C | 4.62556900  | 0.55727900  | -1.07352000 |
| H | 8.11730600  | 2.16406300  | -2.62632000 | H | 3.55866500  | 0.36397000  | -1.23601900 |
| H | 9.40000600  | 3.24746000  | -3.18657700 | H | 5.23056400  | -0.34071100 | -0.89052500 |
| C | 4.61715900  | 0.48103700  | -1.16991300 | O | 4.97672400  | 1.66752800  | -0.50049500 |
| H | 3.53974800  | 0.30365800  | -1.26703900 | H | 5.06342400  | 0.36219100  | -2.69228700 |
| H | 5.21726000  | -0.43258900 | -1.06867200 | H | 6.55423800  | 1.58868300  | -0.10321700 |
| O | 5.01251700  | 1.54880300  | -0.53218500 | C | 9.58512000  | 2.51139100  | 0.60940600  |
| H | 4.93847000  | 0.35389400  | -2.82488500 | H | 9.84884600  | 1.62368400  | 1.18997500  |
| H | 6.58971000  | 1.47308200  | -0.24506200 | H | 10.03593900 | 2.40161000  | -0.38225900 |
| C | 9.63769200  | 2.46354500  | 0.31252400  | H | 9.96696400  | 3.41204700  | 1.08881200  |
| H | 9.99852300  | 1.51642800  | 0.72129000  | C | 5.00026200  | 5.12378500  | -3.33578800 |
| H | 9.98848800  | 2.52998600  | -0.72260100 | O | 4.79909900  | 6.22288800  | -2.76452700 |
| H | 10.02695800 | 3.30495800  | 0.88480200  | O | 5.41429800  | 4.09452500  | -2.69322500 |
| C | 4.68271000  | 5.02401600  | -2.98228100 | C | 4.74222300  | 4.99112700  | -4.82610900 |
| O | 4.28629800  | 5.86171300  | -2.15304400 | H | 5.58179400  | 4.48582400  | -5.30725100 |
| O | 5.47005700  | 4.04109500  | -2.65141800 | H | 3.85479600  | 4.36686300  | -4.97847500 |
| C | 4.25813200  | 5.11568300  | -4.43890900 | H | 4.56929700  | 5.96965700  | -5.27699500 |
| H | 5.05104200  | 4.74456400  | -5.09083600 | K | 3.77733600  | 8.28943200  | -1.82268400 |
| H | 3.37482300  | 4.48354500  | -4.58798200 | I | 3.06238400  | 7.14646900  | 1.20285900  |
| H | 3.98686500  | 6.14280400  | -4.68804600 | K | 4.99982200  | 4.48059700  | 0.00388300  |
| K | 5.09951900  | 4.36737200  | -0.04000900 |   |             |             |             |

**73-TS-d**

|                |             |             |             |    |            |             |             |
|----------------|-------------|-------------|-------------|----|------------|-------------|-------------|
| <b>73-TS-c</b> |             |             |             | C  | 5.41370000 | -0.73115300 | -4.11103200 |
| C              | 7.81641600  | 1.72492300  | -5.33967800 | C  | 4.73093300 | -0.21370800 | -5.22937700 |
| C              | 8.04456200  | 0.91057700  | -6.46347500 | C  | 3.45595400 | 0.33803500  | -5.02331100 |
| C              | 9.28061000  | 0.26437000  | -6.56749500 | C  | 2.86785100 | 0.35588100  | -3.75580100 |
| C              | 10.26109800 | 0.43345600  | -5.59022000 | C  | 3.56226700 | -0.17697500 | -2.66417600 |
| C              | 10.01848900 | 1.26898200  | -4.50236800 | C  | 4.84256800 | -0.72261700 | -2.82200900 |
| C              | 8.79444800  | 1.93461600  | -4.35541500 | H  | 2.90882700 | 0.72389200  | -5.87988100 |
| H              | 9.47607700  | -0.36549800 | -7.43168100 | H  | 1.86441900 | 0.75282100  | -3.62533700 |
| H              | 11.21808900 | -0.07124300 | -5.68658900 | H  | 3.10598600 | -0.18122500 | -1.67753800 |
| H              | 10.78929500 | 1.41800200  | -3.75003100 | O  | 6.62175700 | -1.38596900 | -4.23390900 |
| O              | 6.60853400  | 2.40655600  | -5.24961400 | C  | 7.78520600 | -0.69248200 | -4.64101500 |
| C              | 5.48730200  | 1.66294400  | -4.80404400 | H  | 7.65998500 | -0.18688300 | -5.59822700 |
| H              | 5.59374300  | 0.60648100  | -5.05434100 | Pd | 8.38727900 | 0.83004700  | -3.38639800 |
| Pd             | 5.24523400  | 1.95056200  | -2.79939500 | C  | 5.31340500 | -0.28037100 | -6.61923500 |
| C              | 6.99345700  | 0.76534200  | -7.53773300 | H  | 4.51997500 | -0.24260600 | -7.37068300 |
| H              | 7.44375600  | 0.44244000  | -8.48032400 | H  | 5.98992900 | 0.56136400  | -6.80722200 |
| H              | 6.23127700  | 0.02492100  | -7.26704800 | H  | 5.87958900 | -1.20496500 | -6.76190300 |
| H              | 6.47309900  | 1.71299100  | -7.70330900 | H  | 8.57254500 | -1.44262500 | -4.69567700 |
| H              | 4.59736200  | 2.09063600  | -5.27357700 | C  | 6.67137100 | 2.34780900  | 0.01496100  |
| C              | 8.08893700  | 2.60724100  | 0.45122100  | O  | 7.95604600 | 2.50169100  | 0.31902800  |
| O              | 7.54392300  | 1.46608200  | 0.04196800  | O  | 6.29662200 | 1.92604200  | -1.07773400 |
| O              | 7.44742500  | 3.63067600  | 0.65609400  | C  | 5.60499800 | -1.28832800 | -1.65215800 |
| C              | 8.54527700  | 2.83321400  | -3.17013400 | H  | 4.95596900 | -1.39179500 | -0.77813400 |
| H              | 7.81167800  | 3.60968300  | -3.39100400 | H  | 6.03258800 | -2.26409600 | -1.89680400 |
| H              | 8.15211600  | 2.25439700  | -2.32618800 | H  | 6.43206200 | -0.62270100 | -1.38874900 |
| H              | 9.47730200  | 3.30588900  | -2.84245400 | C  | 9.89430200 | 0.73897300  | -1.70990400 |

|   |             |             |             |   |             |            |             |
|---|-------------|-------------|-------------|---|-------------|------------|-------------|
| H | 9.70470800  | 0.11683900  | -0.82650400 | K | 7.16408800  | 1.30951300 | 0.59471800  |
| H | 10.78250600 | 0.45679600  | -2.28602600 | I | 10.29519600 | 2.57854600 | 0.36851500  |
| O | 9.54828300  | 1.99193200  | -1.66396100 | O | 6.39137700  | 5.40018200 | -0.39979900 |
| H | 8.68784500  | -0.38827300 | -2.41151500 | K | 8.82858700  | 5.17773300 | -1.14876500 |
| H | 8.53190000  | 2.22169800  | -0.46567800 | C | 3.28006400  | 0.79985500 | 0.39866600  |
| C | 5.73271800  | 2.78905600  | 1.10084600  | H | 3.66226800  | 0.21079000 | 1.23848400  |
| H | 6.18994000  | 2.70154900  | 2.08741500  | H | 2.19569400  | 0.70639500 | 0.34657400  |
| H | 5.49787600  | 3.84324800  | 0.90617800  | H | 3.56978600  | 1.84454000 | 0.55621000  |
| H | 4.80839600  | 2.21163000  | 1.04555300  | C | 4.18235000  | 5.06816500 | 0.48267500  |
| K | 8.88033500  | 4.55754200  | -2.15687300 | H | 4.25825800  | 6.10916300 | 0.79906300  |
| I | 5.80860200  | 5.86600300  | -1.49605300 | H | 3.40625300  | 4.98729800 | -0.28524500 |
| K | 4.85665700  | 2.92170500  | -3.08912500 | H | 3.88706500  | 4.43546200 | 1.32492100  |
| I | 7.76474500  | 2.89211300  | -5.17867000 |   |             |            |             |

### 73-TS-f

|                |            |             |             |    |            |             |             |
|----------------|------------|-------------|-------------|----|------------|-------------|-------------|
| <b>73-TS-e</b> |            |             |             | C  | 4.97017800 | 5.59717100  | -3.18662900 |
| C              | 4.04163800 | 4.96826100  | -3.57016500 | C  | 5.58928300 | 6.83170300  | -2.92320100 |
| C              | 4.08348500 | 6.27801500  | -3.05882500 | C  | 4.86109400 | 7.79585200  | -2.21591500 |
| C              | 2.92581300 | 6.78712100  | -2.45998800 | C  | 3.55763700 | 7.53877200  | -1.79156200 |
| C              | 1.76539400 | 6.01930000  | -2.37150400 | C  | 2.96432200 | 6.31078500  | -2.07956900 |
| C              | 1.74657500 | 4.73002200  | -2.90066400 | C  | 3.65535600 | 5.31710400  | -2.78275900 |
| C              | 2.87899100 | 4.18158600  | -3.51699800 | H  | 5.32117100 | 8.75933600  | -2.01104000 |
| H              | 2.94025500 | 7.79946300  | -2.06392600 | H  | 3.00253600 | 8.29827500  | -1.24828700 |
| H              | 0.87489300 | 6.43041900  | -1.90458500 | H  | 1.94479700 | 6.11219700  | -1.75835800 |
| H              | 0.83795000 | 4.13475800  | -2.85207300 | O  | 5.64636100 | 4.66141000  | -3.95759200 |
| O              | 5.15916800 | 4.45049900  | -4.21749300 | C  | 6.65512900 | 3.89654400  | -3.33613900 |
| C              | 6.20259300 | 3.99128100  | -3.38704000 | Pd | 5.89062100 | 2.27758700  | -2.38915100 |
| Pd             | 5.75863400 | 2.34665300  | -2.28227700 | C  | 6.98767400 | 7.11905000  | -3.41423500 |
| C              | 5.33218400 | 7.12293600  | -3.13875600 | H  | 7.15888400 | 8.19649200  | -3.49061400 |
| H              | 5.07613500 | 8.18015700  | -3.25808500 | H  | 7.74785500 | 6.71250300  | -2.73632000 |
| H              | 5.91071900 | 7.01974000  | -2.21329800 | H  | 7.15666100 | 6.66658200  | -4.39544700 |
| H              | 5.96068700 | 6.82188900  | -3.98107000 | C  | 3.93615000 | 0.50988300  | -0.89443400 |
| C              | 3.94649900 | 0.35709800  | -0.87919600 | O  | 3.09181400 | 0.34983500  | -1.86265800 |
| O              | 3.15545500 | -0.02287400 | -1.82873500 | C  | 3.01168000 | 3.98662700  | -3.07486300 |
| C              | 2.83117700 | 2.79262400  | -4.10350800 | H  | 3.40903700 | 3.53609000  | -3.98674900 |
| H              | 3.69711100 | 2.58980700  | -4.73176900 | H  | 3.20819000 | 3.28856300  | -2.25399600 |
| H              | 2.81613600 | 2.03114000  | -3.31808500 | H  | 1.92667700 | 4.08958300  | -3.17381600 |
| H              | 1.92245400 | 2.65759700  | -4.69992800 | C  | 5.40817900 | 0.06043200  | -4.12183200 |
| C              | 5.47645600 | 0.03950400  | -4.06232600 | H  | 5.92534500 | 0.12900900  | -5.08852600 |
| H              | 5.96686100 | 0.21531500  | -5.02963100 | H  | 6.26038400 | 1.43387800  | -3.71723500 |
| H              | 5.86040400 | 1.58723200  | -3.69380800 | H  | 5.93403400 | -0.50350100 | -3.33901100 |
| H              | 6.11945900 | -0.35160800 | -3.26347500 | O  | 4.15438100 | 0.17810300  | -4.09268600 |
| O              | 4.23146700 | -0.15156800 | -4.03754400 | H  | 3.57186400 | 0.20116800  | -2.80965100 |
| H              | 3.66784800 | -0.16957100 | -2.76688900 | H  | 7.35306300 | 3.59570300  | -4.11655500 |
| H              | 7.05466600 | 3.79638700  | -4.04255100 | H  | 7.15365500 | 4.44277900  | -2.52753000 |
| H              | 6.43176200 | 4.72537900  | -2.60542900 | O  | 5.17507100 | 0.37027400  | -1.01949500 |
| O              | 5.19493700 | 0.40084800  | -0.98501000 | C  | 6.05284100 | 4.14083700  | 0.07480300  |
| C              | 5.49308800 | 4.58131800  | -0.10889400 | O  | 5.26442800 | 3.45865100  | -0.68248600 |
| O              | 5.58735600 | 3.30415000  | -0.29129900 | O  | 7.25369300 | 3.86034900  | 0.29522500  |

|   |            |            |             |
|---|------------|------------|-------------|
| K | 7.43713300 | 1.30629900 | 0.08670900  |
| C | 3.34772100 | 0.96165900 | 0.41516700  |
| H | 3.82086600 | 0.43115600 | 1.24561700  |
| H | 2.26610100 | 0.83065600 | 0.44427300  |
| H | 3.59791200 | 2.02628200 | 0.49887100  |
| C | 5.42617200 | 5.36984800 | 0.71219300  |
| H | 6.05513000 | 5.75531700 | 1.51622600  |
| H | 5.30920500 | 6.13534300 | -0.06114700 |
| H | 4.42408600 | 5.13783800 | 1.08214200  |

**73-TS-g**

|    |            |             |             |
|----|------------|-------------|-------------|
| C  | 4.48274200 | 4.88101100  | -4.38196800 |
| C  | 4.59582500 | 6.16922200  | -3.84032500 |
| C  | 3.43359000 | 6.76624700  | -3.33629400 |
| C  | 2.20641400 | 6.11053100  | -3.38455400 |
| C  | 2.11892500 | 4.84333600  | -3.96127700 |
| C  | 3.25351500 | 4.20714500  | -4.47389600 |
| H  | 3.50176500 | 7.76223200  | -2.90624800 |
| H  | 1.31654600 | 6.59163900  | -2.98862600 |
| H  | 1.15920100 | 4.33625500  | -4.02080900 |
| O  | 5.58895000 | 4.22742100  | -4.92528200 |
| C  | 6.59354000 | 3.78893300  | -4.05339200 |
| Pd | 5.87256400 | 2.50534300  | -2.63831200 |
| C  | 5.91213600 | 6.90442900  | -3.79532900 |
| H  | 5.74892900 | 7.98599200  | -3.81907200 |
| H  | 6.45729200 | 6.67456300  | -2.87185300 |
| H  | 6.54866800 | 6.63403000  | -4.64270400 |
| C  | 3.77397200 | 0.79089100  | -0.88394900 |
| O  | 2.95724700 | 0.45851700  | -1.84098700 |
| C  | 3.17052100 | 2.84298300  | -5.11095700 |
| H  | 3.68757400 | 2.82564700  | -6.07518800 |
| H  | 3.64440200 | 2.07478500  | -4.49314300 |
| H  | 2.12847500 | 2.55016000  | -5.26664300 |
| C  | 5.36504400 | -0.26166200 | -3.95579400 |
| H  | 5.93782100 | -0.30283300 | -4.89322300 |
| H  | 6.07143100 | 1.39681600  | -3.78343100 |
| H  | 5.90611200 | -0.52512700 | -3.03684400 |
| O  | 4.12145100 | -0.23484900 | -3.98519300 |
| H  | 3.45636100 | 0.11921100  | -2.68150800 |
| H  | 7.35179700 | 3.30466700  | -4.66723800 |
| H  | 7.01183400 | 4.58938300  | -3.43964800 |
| O  | 5.01255900 | 0.65357800  | -0.95730400 |
| C  | 3.12314600 | 1.39997600  | 0.32660300  |
| H  | 3.53727700 | 0.95286300  | 1.23413500  |
| H  | 2.03985000 | 1.28401200  | 0.30405200  |
| H  | 3.38561000 | 2.46482600  | 0.33198400  |
| I  | 5.78235100 | 4.37140200  | -0.49138800 |
| K  | 7.32373700 | 1.38091600  | -0.03776200 |

**73-TS-h**

|    |            |             |             |
|----|------------|-------------|-------------|
| C  | 4.47099500 | 4.65769500  | -5.28506000 |
| C  | 4.78694600 | 5.90540200  | -5.84745600 |
| C  | 3.79346900 | 6.88998700  | -5.85981400 |
| C  | 2.52703700 | 6.63247100  | -5.33615200 |
| C  | 2.23660700 | 5.37813000  | -4.80306700 |
| C  | 3.20149700 | 4.36355100  | -4.76815900 |
| H  | 4.01661700 | 7.86114400  | -6.29419600 |
| H  | 1.76378400 | 7.40501500  | -5.35548800 |
| H  | 1.24557900 | 5.17261800  | -4.40657600 |
| O  | 5.43929000 | 3.65668200  | -5.31432100 |
| C  | 6.42634200 | 3.71278700  | -4.31442000 |
| Pd | 5.96009200 | 2.50448500  | -2.73513900 |
| C  | 6.15278600 | 6.15851400  | -6.43873400 |
| H  | 6.13737600 | 7.03107900  | -7.09717000 |
| H  | 6.90358800 | 6.34662000  | -5.66119900 |
| H  | 6.49570500 | 5.29212800  | -7.01245500 |
| C  | 3.69707100 | 0.95816300  | -1.09323600 |
| O  | 2.96986100 | 0.50794400  | -2.06678900 |
| C  | 2.89397100 | 3.01446200  | -4.17515100 |
| H  | 3.39936400 | 2.20531700  | -4.70669700 |
| H  | 3.23199800 | 2.97164200  | -3.13306200 |
| H  | 1.81800200 | 2.81845800  | -4.17530200 |
| C  | 5.48912700 | -0.21892500 | -3.97752600 |
| H  | 6.11953700 | -0.32907200 | -4.87040500 |
| H  | 6.23533800 | 1.35489200  | -3.81895000 |
| H  | 5.94676000 | -0.48881800 | -3.01661600 |
| O  | 4.24833200 | -0.14344200 | -4.10522700 |
| H  | 3.53829000 | 0.17649700  | -2.89197000 |
| H  | 7.36598700 | 3.38815300  | -4.77429500 |
| H  | 6.50400000 | 4.72135800  | -3.89366400 |
| O  | 4.94640300 | 0.91037700  | -1.06941100 |
| C  | 2.92807800 | 1.59951700  | 0.03483900  |
| H  | 3.19027600 | 1.12414100  | 0.98565000  |
| H  | 1.85175700 | 1.53200700  | -0.12061000 |
| H  | 3.23636500 | 2.65005800  | 0.08707800  |
| I  | 5.93619400 | 4.49445100  | -0.72176600 |
| K  | 6.71164000 | 1.30349400  | 0.90611500  |
| K  | 9.12310100 | 3.34661100  | -2.21457400 |
| I  | 9.94085600 | 0.97851400  | -0.00289600 |

**73-TS-partA**

|   |            |             |             |
|---|------------|-------------|-------------|
| C | 4.51631700 | -1.17667400 | -4.46603700 |
| C | 5.04520300 | -0.79568800 | -5.70944100 |
| C | 4.48399900 | -1.35902400 | -6.86066100 |
| C | 3.43052000 | -2.26801500 | -6.76957500 |
| C | 2.92666400 | -2.62876000 | -5.52091600 |



|                    |             |             |             |              |             |             |             |
|--------------------|-------------|-------------|-------------|--------------|-------------|-------------|-------------|
| C                  | 3.45906600  | -2.09117000 | -4.34179000 | C            | 5.67484800  | -3.26960500 | -2.99615600 |
| H                  | 4.87810000  | -1.07733700 | -7.83351900 | C            | 6.46549400  | -2.12276600 | -3.15598500 |
| H                  | 3.00041600  | -2.69305500 | -7.67161500 | H            | 2.78614400  | -2.20501500 | -4.44842400 |
| H                  | 2.09936200  | -3.32997900 | -5.45200800 | H            | 3.75598100  | -4.20039100 | -3.31996500 |
| O                  | 5.10972600  | -0.65800400 | -3.31369700 | H            | 6.10749600  | -4.13483600 | -2.50377500 |
| C                  | 4.66186300  | 0.66983200  | -2.91162200 | O            | 6.70138100  | 0.09748000  | -3.96033800 |
| H                  | 4.10880000  | 1.12390300  | -3.73329500 | C            | 6.44132900  | 1.28409600  | -3.21260400 |
| Pd                 | 3.61478700  | 0.52317000  | -1.20895300 | H            | 5.57177100  | 1.82497400  | -3.62011600 |
| C                  | 6.18151000  | 0.19381400  | -5.78687400 | Pd           | 5.95460200  | 1.26071000  | -1.21295200 |
| H                  | 6.60501000  | 0.22702000  | -6.79384400 | C            | 3.98125600  | 0.18570000  | -4.97035000 |
| H                  | 5.84836400  | 1.20490100  | -5.52809300 | H            | 3.15872900  | -0.11849500 | -5.62387500 |
| H                  | 6.98022600  | -0.06142400 | -5.08186300 | H            | 3.58886600  | 0.93543200  | -4.27261900 |
| H                  | 5.55797600  | 1.25642800  | -2.67377600 | H            | 4.74476100  | 0.67829300  | -5.57854500 |
| C                  | 2.90354100  | -2.47074700 | -2.99179900 | H            | 7.33863900  | 1.89770400  | -3.34058600 |
| H                  | 3.61532100  | -3.06110400 | -2.39885500 | C            | 9.95104500  | 0.49131600  | -0.57937400 |
| H                  | 2.66004800  | -1.58424000 | -2.39562300 | O            | 9.22563000  | 1.19191800  | -1.45214400 |
| H                  | 1.99883100  | -3.07391400 | -3.10068300 | O            | 9.46573000  | -0.17497400 | 0.32275100  |
| I                  | 2.11656800  | 2.57500800  | -1.99078500 | C            | 7.89975300  | -2.11647000 | -2.68667300 |
| C                  | 3.77635200  | -1.02642100 | 0.93647000  | H            | 8.24363900  | -1.10198100 | -2.48326200 |
| O                  | 2.88682100  | -0.15531200 | 0.88622000  | H            | 8.00547500  | -2.73501500 | -1.79029600 |
| O                  | 4.61554400  | -1.19470700 | -0.03720200 | H            | 8.55612100  | -2.52881200 | -3.46348700 |
| K                  | 6.38908200  | -2.04416800 | -1.50780900 | H            | 6.40204700  | -0.19372800 | -1.30317300 |
| C                  | 3.91709900  | -1.93455400 | 2.14113800  | H            | 8.25953300  | 1.07629800  | -1.26373800 |
| H                  | 3.82580700  | -2.98001600 | 1.82798500  | I            | 4.98078100  | 1.59576000  | 1.36374600  |
| H                  | 3.15168000  | -1.70612700 | 2.88295900  | K            | 7.38854400  | -1.42027700 | 1.34897700  |
| H                  | 4.90944100  | -1.80648500 | 2.58626400  | C            | 11.42906900 | 0.60826900  | -0.84642300 |
| <b>73-TS-partB</b> |             |             |             | H            | 11.98669100 | 0.06807500  | -0.08246800 |
| C                  | -1.55070500 | 0.09889000  | -0.03480500 | H            | 11.65043200 | 0.19431000  | -1.83496200 |
| O                  | -0.69650400 | 0.37106200  | -0.95105000 | H            | 11.72220200 | 1.66166500  | -0.86045000 |
| O                  | -1.43211700 | -0.82282500 | 0.81419300  | K            | 3.73869700  | -1.27004000 | -0.67852200 |
| C                  | 2.18063700  | 1.94251700  | 0.45174300  | C            | 5.92999700  | -3.88813600 | 0.32814400  |
| H                  | 3.17788600  | 1.79200100  | 0.87864400  | O            | 5.17266600  | -2.88376500 | 0.56886800  |
| H                  | 1.49500300  | 2.20663800  | 1.27171600  | O            | 7.18447000  | -3.85207300 | 0.30303800  |
| O                  | 1.79533800  | 0.75030300  | -0.20649700 | C            | 5.22169300  | -5.21866100 | 0.06064100  |
| H                  | 2.23478700  | 2.79808700  | -0.23715700 | H            | 4.53552800  | -5.10683100 | -0.78619600 |
| H                  | 0.85951300  | 0.84314800  | -0.53436700 | H            | 5.93939300  | -6.01284400 | -0.15112900 |
| K                  | 0.82289200  | -1.68081400 | -0.05542000 | H            | 4.61662000  | -5.49120600 | 0.93157300  |
| C                  | -2.80050100 | 0.97738900  | 0.00335100  | <b>75-TS</b> |             |             |             |
| H                  | -3.50684100 | 0.62789200  | 0.75812200  | C            | 5.54903600  | -1.50597000 | -3.99361300 |
| H                  | -2.50813700 | 2.00990500  | 0.22319200  | C            | 4.34204400  | -0.80952400 | -4.20138000 |
| H                  | -3.27399400 | 0.98398800  | -0.98320900 | C            | 3.13715400  | -1.48077200 | -3.94267100 |
| <b>74</b>          |             |             |             | C            | 3.13098900  | -2.81101100 | -3.51162400 |
| C                  | 5.89250400  | -0.99598100 | -3.78060500 | C            | 4.34291700  | -3.48427900 | -3.32233100 |
| C                  | 4.56209100  | -1.00649700 | -4.24857400 | C            | 5.56983200  | -2.84408000 | -3.54860700 |
| C                  | 3.80426100  | -2.17322200 | -4.06608600 | H            | 2.19796300  | -0.96128300 | -4.11668800 |
| C                  | 4.35187400  | -3.29972200 | -3.44124500 | H            | 2.18845400  | -3.32935700 | -3.35541600 |
|                    |             |             |             | H            | 4.34214100  | -4.52370200 | -3.00496700 |

|    |             |             |             |   |            |             |             |
|----|-------------|-------------|-------------|---|------------|-------------|-------------|
| O  | 6.76283400  | -0.94721400 | -4.31705900 | H | 4.10145900 | 1.20790200  | -6.79009400 |
| C  | 7.28871400  | 0.12990900  | -3.54875000 | H | 4.73704300 | 1.80894200  | -5.25244400 |
| H  | 6.90051500  | 1.09937100  | -3.89779600 | H | 5.81052800 | 0.96204600  | -6.37765700 |
| Pd | 6.56219400  | 0.50386200  | -1.60249300 | H | 8.17647200 | 0.57387700  | -4.04052400 |
| C  | 4.34287500  | 0.60633700  | -4.72068200 | C | 6.76739600 | 3.64798000  | 1.39389300  |
| H  | 3.37791800  | 0.85934800  | -5.16793700 | O | 7.57857500 | 2.79217800  | 0.77658100  |
| H  | 4.53664300  | 1.32616100  | -3.91654000 | O | 5.74488700 | 3.30906100  | 1.97691600  |
| H  | 5.12309400  | 0.74048500  | -5.47544000 | C | 6.17765700 | -3.12131600 | -3.34619800 |
| H  | 8.36655200  | 0.11143400  | -3.71319300 | H | 6.99486400 | -3.34949400 | -4.03775300 |
| C  | 10.05492000 | 1.50408900  | -0.04161000 | H | 6.61437800 | -2.54884800 | -2.52293200 |
| O  | 9.29042400  | 2.05627600  | -0.98233600 | H | 5.78282000 | -4.06061600 | -2.94983900 |
| O  | 9.75771700  | 0.48576600  | 0.56687200  | C | 7.14779000 | -0.53323600 | 0.03225600  |
| C  | 6.88103000  | -3.55226000 | -3.31949900 | H | 6.74924400 | -1.55132900 | -0.06137300 |
| H  | 7.59419000  | -3.31995700 | -4.11376500 | H | 8.23680600 | -0.44359800 | 0.13054200  |
| H  | 7.33551900  | -3.24861000 | -2.36954300 | O | 6.38581900 | 0.39931900  | 0.49420000  |
| H  | 6.73676400  | -4.63494500 | -3.27567500 | H | 7.60488200 | -0.42129100 | -2.39292000 |
| H  | 7.50307400  | -0.64417000 | -2.03678100 | H | 7.15476000 | 1.89162600  | 0.76383500  |
| H  | 8.44720200  | 1.53629300  | -1.07876100 | I | 4.64721700 | 2.67208900  | -2.00733500 |
| I  | 5.31198700  | 1.55321500  | 0.57840000  | K | 4.02765200 | 1.27009700  | 1.64704000  |
| K  | 7.94685100  | -1.39620200 | 1.00816500  | C | 7.22845200 | 5.07635100  | 1.27103300  |
| C  | 11.32252900 | 2.28622400  | 0.19162300  | H | 6.70043800 | 5.70099400  | 1.99104900  |
| H  | 11.96697100 | 1.74741900  | 0.88523600  | H | 8.30948300 | 5.14798800  | 1.41163400  |
| H  | 11.83806800 | 2.45589800  | -0.75742100 | H | 6.99985100 | 5.41953600  | 0.25617400  |
| H  | 11.06778500 | 3.26698500  | 0.60522700  | K | 2.81174300 | -0.29512100 | -2.07396300 |
| K  | 4.02778500  | -1.60377200 | -0.54101600 | C | 2.15943700 | -1.16692600 | 1.46027400  |
| C  | 6.55607900  | -3.99879800 | 0.23098300  | O | 2.44022700 | -0.65298800 | 0.31769400  |
| O  | 5.73753300  | -3.06145400 | 0.53728300  | O | 2.56863800 | -0.73814300 | 2.56101800  |
| O  | 7.79881900  | -3.86328100 | 0.12723100  | C | 1.25024400 | -2.39920100 | 1.43447800  |
| C  | 5.94071800  | -5.37384100 | -0.04159900 | H | 1.71388200 | -3.18629300 | 0.82914500  |
| H  | 5.31476000  | -5.31790700 | -0.93951100 | H | 1.06595400 | -2.77426700 | 2.44224700  |
| H  | 6.71447000  | -6.12795900 | -0.19240100 | H | 0.29731100 | -2.14279100 | 0.95857800  |
| H  | 5.28991900  | -5.66286700 | 0.78952500  |   |            |             |             |

#### 75-TS-b

|                |            |             |             |    |             |            |             |
|----------------|------------|-------------|-------------|----|-------------|------------|-------------|
| <b>75-TS-a</b> |            |             |             | C  | 2.96156200  | 4.80356300 | -3.17903200 |
| C              | 5.40903900 | -1.08663600 | -4.62892700 | C  | 2.76160900  | 5.82450900 | -2.22811800 |
| C              | 4.44526900 | -0.32824100 | -5.32131500 | C  | 1.56440000  | 5.81967800 | -1.49448600 |
| C              | 3.14260600 | -0.84713100 | -5.40866800 | C  | 0.58726900  | 4.84129300 | -1.70403900 |
| C              | 2.81011900 | -2.07707400 | -4.83397100 | C  | 0.80017300  | 3.84464800 | -2.66559500 |
| C              | 3.78706700 | -2.81115900 | -4.15128800 | C  | 1.98588900  | 3.81112000 | -3.41272500 |
| C              | 5.09831500 | -2.32938300 | -4.04030200 | H  | 1.39175900  | 6.61007300 | -0.76826200 |
| H              | 2.39232300 | -0.28669900 | -5.96097800 | H  | -0.34643000 | 4.87500100 | -1.14915300 |
| H              | 1.80405900 | -2.47421400 | -4.93968700 | H  | 0.03249700  | 3.09779800 | -2.85489100 |
| H              | 3.53857200 | -3.77637800 | -3.71751000 | O  | 4.06573200  | 4.76703700 | -3.98515700 |
| O              | 6.73355500 | -0.70804900 | -4.60185600 | C  | 5.35971100  | 4.47159800 | -3.42984400 |
| C              | 7.12040300 | 0.41421600  | -3.83132500 | Pd | 5.57931200  | 3.53942100 | -1.54314000 |
| H              | 6.55687800 | 1.31193500  | -4.08702700 | C  | 3.79637100  | 6.89952300 | -2.01881900 |
| Pd             | 6.57119000 | 0.53935500  | -1.74382000 | H  | 3.35407100  | 7.78358200 | -1.55192600 |
| C              | 4.79455300 | 0.98509900  | -5.97434400 | H  | 4.60484100  | 6.54289400 | -1.37037900 |

|                |             |            |             |                |            |             |             |
|----------------|-------------|------------|-------------|----------------|------------|-------------|-------------|
| H              | 4.24471900  | 7.19329900 | -2.97205600 | C              | 2.70399800 | 8.32738700  | -1.57131500 |
| C              | 2.24494100  | 2.75407300 | -4.45587200 | C              | 2.10901700 | 7.06627600  | -1.44665100 |
| H              | 2.38724100  | 3.20821000 | -5.44124900 | C              | 2.59512100 | 5.96741900  | -2.16838800 |
| H              | 3.16526900  | 2.20396600 | -4.23298900 | H              | 4.23770300 | 9.48471200  | -2.55244700 |
| H              | 1.41511700  | 2.04431600 | -4.51534700 | H              | 2.30581500 | 9.17473700  | -1.01960300 |
| H              | 5.14666500  | 2.91872800 | -2.89777500 | H              | 1.25222800 | 6.93067100  | -0.79163200 |
| I              | 5.90092200  | 3.24156800 | 1.17468100  | O              | 4.13456200 | 5.09144100  | -3.76667600 |
| H              | 5.94958200  | 4.11387200 | -4.27454400 | C              | 5.35380400 | 4.46329500  | -3.37741200 |
| H              | 5.83233400  | 5.38710500 | -3.04447400 | Pd             | 5.42222800 | 3.53264200  | -1.47352000 |
| K              | 2.79470500  | 2.86172000 | -0.16571800 | C              | 5.46845100 | 7.62763800  | -4.11913700 |
| <b>75-TS-c</b> |             |            |             | H              | 5.46864700 | 8.64665400  | -4.51667600 |
| C              | 2.92267800  | 4.75848100 | -3.34655200 | H              | 6.42608000 | 7.47254000  | -3.60713900 |
| C              | 2.67200800  | 5.74237900 | -2.36965800 | H              | 5.41440800 | 6.92437400  | -4.95358400 |
| C              | 1.43397600  | 5.71773800 | -1.70872900 | C              | 1.95793400 | 4.60549600  | -2.06988800 |
| C              | 0.46525400  | 4.75794000 | -2.01655600 | H              | 1.61631400 | 4.26594800  | -3.05297500 |
| C              | 0.72719400  | 3.80149500 | -3.00540100 | H              | 2.68284800 | 3.86482800  | -1.71420600 |
| C              | 1.95571200  | 3.78694400 | -3.68023000 | H              | 1.10531700 | 4.61909500  | -1.38584800 |
| H              | 1.22490600  | 6.47608200 | -0.95838500 | H              | 4.86281400 | 2.97568400  | -2.79493900 |
| H              | -0.49655200 | 4.77237500 | -1.51134700 | H              | 5.70497800 | 3.92918100  | -4.25992200 |
| H              | -0.03156900 | 3.06790100 | -3.26829700 | H              | 6.11702300 | 5.19810700  | -3.08952200 |
| O              | 4.07659600  | 4.74218100 | -4.08208400 | K              | 5.19363200 | 6.73135700  | 0.15347600  |
| C              | 5.33235400  | 4.40910200 | -3.45624700 | C              | 5.43983500 | 3.67409900  | 1.60868400  |
| Pd             | 5.49128200  | 3.49287500 | -1.56044400 | O              | 6.13220900 | 3.30865100  | 0.57364200  |
| C              | 3.69875800  | 6.80061100 | -2.05893500 | O              | 4.71627300 | 4.68225100  | 1.66014600  |
| H              | 3.23496800  | 7.66990300 | -1.58494000 | C              | 5.58903500 | 2.77336100  | 2.82781600  |
| H              | 4.46759800  | 6.41332600 | -1.38013000 | H              | 4.96407800 | 3.12458300  | 3.64938900  |
| H              | 4.20405300  | 7.12644100 | -2.97256900 | H              | 5.31404900 | 1.74869200  | 2.56031800  |
| C              | 2.26949800  | 2.77047500 | -4.74886400 | H              | 6.63666700 | 2.75540500  | 3.14790400  |
| H              | 2.47657500  | 3.26222500 | -5.70435300 | I              | 8.38893300 | 6.73035400  | -1.14050000 |
| H              | 3.16913900  | 2.19940300 | -4.49495100 | K              | 8.47280300 | 3.42701900  | -0.52695700 |
| H              | 1.43854700  | 2.07325600 | -4.88849900 | <b>75-TS-e</b> |            |             |             |
| H              | 4.99891600  | 2.93890400 | -2.92170800 | C              | 6.19698500 | 2.18798100  | -5.30619100 |
| H              | 5.95363300  | 4.02823100 | -4.26880800 | C              | 4.86164600 | 2.37213400  | -5.71478500 |
| H              | 5.80833100  | 5.32003200 | -3.06233800 | C              | 4.15895900 | 1.25540900  | -6.19300500 |
| K              | 2.65549800  | 2.64951100 | -0.45882400 | C              | 4.76455400 | -0.00104000 | -6.27939100 |
| C              | 5.31134900  | 3.04507500 | 1.53507900  | C              | 6.09841000 | -0.15767500 | -5.88064900 |
| O              | 5.99844600  | 3.20770500 | 0.46608400  | C              | 6.83059800 | 0.93065000  | -5.38546500 |
| O              | 4.07720700  | 2.83754500 | 1.59654600  | H              | 3.12932900 | 1.38369800  | -6.51645900 |
| C              | 6.12444100  | 3.09834800 | 2.82469600  | H              | 4.21192600 | -0.84584500 | -6.68207700 |
| H              | 5.47499100  | 3.02811400 | 3.69846300  | H              | 6.58448100 | -1.12653700 | -5.97189200 |
| H              | 6.84268700  | 2.27218100 | 2.83208000  | O              | 6.97457000 | 3.24107400  | -4.89744300 |
| H              | 6.70276700  | 4.02631100 | 2.85809000  | C              | 6.70748500 | 3.85411800  | -3.62844900 |
| <b>75-TS-d</b> |             |            |             | H              | 5.84106100 | 4.52201500  | -3.68781800 |
| C              | 3.70470600  | 6.16344800 | -3.01563300 | Pd             | 5.76333800 | 2.72686100  | -2.03675400 |
| C              | 4.30866400  | 7.42664500 | -3.17579700 | C              | 4.22157100 | 3.73488700  | -5.66626300 |
| C              | 3.79062500  | 8.50098300 | -2.43290600 | H              | 3.33965500 | 3.77417800  | -6.31170500 |
|                |             |            |             | H              | 3.91343500 | 3.98539800  | -4.64615400 |

|                |            |             |             |                |             |             |             |
|----------------|------------|-------------|-------------|----------------|-------------|-------------|-------------|
| H              | 4.92993100 | 4.50157900  | -5.99469800 | H              | 2.03225000  | 0.52011800  | -0.69893800 |
| H              | 7.59119400 | 4.45370500  | -3.41144100 | I              | 5.50217900  | 1.95623400  | 0.55597100  |
| C              | 8.26878500 | 0.79562300  | -4.95287900 | H              | 6.02892600  | 4.08563800  | -4.46636100 |
| H              | 8.91299600 | 1.46394900  | -5.53239800 | H              | 5.72025100  | 5.08818200  | -3.02468200 |
| H              | 8.38740100 | 1.08060300  | -3.90241300 | O              | 3.21213300  | -1.46039500 | -0.25352600 |
| H              | 8.62496800 | -0.23055600 | -5.08111400 | K              | 4.80488000  | -0.41232600 | -2.01169400 |
| C              | 4.88394700 | 1.83671500  | -0.14396100 | C              | 2.18679200  | -1.36531300 | 1.92708800  |
| O              | 5.64993700 | 0.94385600  | -0.60431900 | H              | 2.76146100  | -0.72272300 | 2.60312200  |
| K              | 4.51517400 | -0.09942400 | -2.94664600 | H              | 1.13109900  | -1.26383700 | 2.18772000  |
| C              | 2.68479500 | 2.86650000  | -2.51544300 | H              | 2.52014300  | -2.39638600 | 2.04263100  |
| O              | 3.67009000 | 3.64175500  | -2.29229100 |                |             |             |             |
| O              | 2.71790600 | 1.60633000  | -2.48262100 | <b>75-TS-g</b> |             |             |             |
| C              | 1.36932600 | 3.54083400  | -2.89824500 | C              | 2.83675800  | 4.42284700  | -2.94899200 |
| H              | 1.32293600 | 4.56177800  | -2.51492800 | C              | 2.80742700  | 5.70215100  | -2.35780300 |
| H              | 1.30934900 | 3.58349900  | -3.99232100 | C              | 1.63304000  | 6.09940100  | -1.70018200 |
| H              | 0.52062700 | 2.95417800  | -2.53939600 | C              | 0.51544300  | 5.26065800  | -1.63657500 |
| H              | 5.25333600 | 2.54098500  | 0.61861800  | C              | 0.56339300  | 3.99681900  | -2.23680000 |
| H              | 3.80460700 | 1.80655600  | -0.33422300 | C              | 1.72123400  | 3.56198600  | -2.89498300 |
| H              | 7.23591700 | 2.71175200  | -2.59782500 | H              | 1.59189500  | 7.09022500  | -1.25443800 |
|                |            |             |             | H              | -0.39438800 | 5.60007200  | -1.14881500 |
| <b>75-TS-f</b> |            |             |             | H              | -0.30578300 | 3.34429400  | -2.20317100 |
| C              | 3.77685800 | 5.87597300  | -4.32718100 | O              | 3.90619800  | 3.98283100  | -3.68075300 |
| C              | 4.12124000 | 6.44334800  | -5.56274500 | C              | 5.15884600  | 3.69246700  | -3.03403100 |
| C              | 3.82791800 | 7.79727700  | -5.76590500 | Pd             | 5.26278700  | 3.34602400  | -0.94775800 |
| C              | 3.22111600 | 8.55596400  | -4.76622400 | C              | 3.99510200  | 6.62496500  | -2.44960800 |
| C              | 2.88769500 | 7.96546200  | -3.54698500 | H              | 3.69849200  | 7.66329100  | -2.27878700 |
| C              | 3.15661700 | 6.61363400  | -3.30625300 | H              | 4.75279000  | 6.36244300  | -1.70241500 |
| H              | 4.07985500 | 8.25484700  | -6.71927600 | H              | 4.46532600  | 6.55214000  | -3.43438100 |
| H              | 3.00304400 | 9.60601500  | -4.93802700 | C              | 3.21410400  | 0.22329100  | -0.32466700 |
| H              | 2.41044600 | 8.55612100  | -2.76936800 | O              | 3.26505600  | -0.35029400 | -1.53642500 |
| O              | 4.02397400 | 4.52334200  | -4.10865900 | C              | 1.80259100  | 2.20996700  | -3.55584800 |
| C              | 5.34395000 | 4.24918900  | -3.63049000 | H              | 1.79579200  | 2.30333900  | -4.64719500 |
| Pd             | 5.35052400 | 2.94194600  | -1.98184400 | H              | 2.74411000  | 1.71569000  | -3.29827900 |
| C              | 4.78587200 | 5.61062400  | -6.63094000 | H              | 0.95754600  | 1.57842600  | -3.26300000 |
| H              | 4.61015700 | 6.03265200  | -7.62438900 | H              | 4.75643400  | 2.40336400  | -2.06923500 |
| H              | 5.87162700 | 5.56466500  | -6.48137500 | H              | 2.51143100  | -0.00715100 | -2.04661700 |
| H              | 4.41237800 | 4.58311700  | -6.61267800 | I              | 5.57614400  | 3.70161900  | 1.76280700  |
| C              | 2.43742400 | -0.89779800 | 0.51826300  | H              | 5.67666700  | 3.02326900  | -3.72220300 |
| O              | 1.76171100 | 0.19759000  | 0.20847100  | H              | 5.76197600  | 4.60643500  | -2.93043400 |
| C              | 2.77824300 | 5.95030500  | -2.00557800 | O              | 2.30259600  | 0.97952700  | -0.01268800 |
| H              | 1.95800200 | 5.23843800  | -2.15453200 | K              | 2.32666000  | 3.53385600  | 0.59717400  |
| H              | 3.61265300 | 5.38611500  | -1.57617000 | C              | 4.37604400  | -0.13022800 | 0.55157500  |
| H              | 2.45069200 | 6.68843700  | -1.26911500 | H              | 4.85435300  | -1.05656700 | 0.23261400  |
| C              | 2.71163200 | 2.39022700  | -2.15176700 | H              | 5.09726400  | 0.69406700  | 0.48454900  |
| H              | 2.82130500 | 2.97090000  | -3.07483700 | H              | 4.04515700  | -0.19417300 | 1.58921500  |
| H              | 5.28236100 | 2.52587600  | -3.47194900 |                |             |             |             |
| H              | 2.58925200 | 2.95617300  | -1.21583900 | <b>75-TS-h</b> |             |             |             |
| O              | 2.53284500 | 1.15731000  | -2.17306800 | C              | 3.30536200  | 4.38301200  | -3.65740900 |

|                |            |             |             |              |             |             |             |
|----------------|------------|-------------|-------------|--------------|-------------|-------------|-------------|
| C              | 3.13268500 | 5.57708200  | -2.92697400 | H            | 3.81062700  | 1.01428100  | -6.58356300 |
| C              | 2.05098200 | 5.65230600  | -2.03521800 | H            | 4.51365900  | 1.65557600  | -5.09393200 |
| C              | 1.15792600 | 4.58593600  | -1.89042600 | H            | 5.57451100  | 1.07595600  | -6.38912700 |
| C              | 1.33025200 | 3.42582100  | -2.65582000 | H            | 8.27602200  | 0.94435600  | -4.16792000 |
| C              | 2.40174700 | 3.30595200  | -3.55425200 | C            | 7.09601100  | -3.04728500 | -3.86330700 |
| H              | 1.89275200 | 6.57132100  | -1.47637600 | H            | 7.71431100  | -3.26403200 | -4.74169000 |
| H              | 0.30956200 | 4.67359800  | -1.21664500 | H            | 7.67937300  | -2.37849700 | -3.22729200 |
| H              | 0.61535100 | 2.61022300  | -2.57627700 | H            | 6.92272700  | -3.98726500 | -3.33135800 |
| O              | 4.32477800 | 4.28979000  | -4.57538200 | C            | 6.69748700  | -1.23040500 | -0.56424700 |
| C              | 5.64557600 | 4.09338500  | -4.06578200 | H            | 6.55992800  | -2.16916700 | -1.11939700 |
| Pd             | 5.95392400 | 2.14687700  | -3.26748800 | H            | 7.67293200  | -1.10728000 | -0.07411300 |
| C              | 4.05033500 | 6.75447200  | -3.15045800 | O            | 5.67519100  | -0.58478800 | -0.12986900 |
| H              | 3.57543000 | 7.68131300  | -2.81721200 | H            | 7.85717200  | -0.13601900 | -2.55498100 |
| H              | 4.99869800 | 6.65131700  | -2.61281200 | I            | 4.41448700  | 2.39087500  | -2.03730000 |
| H              | 4.29083000 | 6.84461300  | -4.21370300 | K            | 4.13940600  | 1.05849100  | 1.39285600  |
| C              | 2.58696100 | 2.08162000  | -4.41252300 | K            | 3.19477700  | -0.99841200 | -1.74604400 |
| H              | 2.61330800 | 2.35454800  | -5.47195200 | C            | 1.76659500  | -0.80958300 | 1.70023000  |
| H              | 3.54335900 | 1.59137400  | -4.19165500 | O            | 2.20299400  | -0.73397700 | 0.49820600  |
| H              | 1.77960000 | 1.36197200  | -4.25255400 | O            | 2.26213100  | -0.20499600 | 2.68116000  |
| H              | 6.29332400 | 2.63039100  | -4.69302000 | C            | 0.55021900  | -1.70999500 | 1.92241900  |
| I              | 5.83776100 | 0.38146000  | -1.12356000 | H            | 0.78672800  | -2.73145700 | 1.60475100  |
| H              | 6.31336300 | 4.54305200  | -4.79910800 | H            | 0.24790700  | -1.71290400 | 2.97066700  |
| H              | 5.79464200 | 4.61585400  | -3.11256100 | H            | -0.28059100 | -1.36189700 | 1.29949600  |
| K              | 3.64886000 | 3.00614800  | -0.26489700 |              |             |             |             |
| C              | 5.88424000 | 5.69301000  | -0.22841400 | <b>76-TS</b> |             |             |             |
| O              | 6.77873600 | 5.90580300  | -1.08797900 | C            | 3.62449200  | 4.93514300  | -3.36936600 |
| O              | 5.58390600 | 4.53974200  | 0.23663100  | C            | 3.69214400  | 6.29425800  | -3.01678200 |
| C              | 5.06385300 | 6.87423200  | 0.29071100  | C            | 2.57386300  | 6.87273500  | -2.40823400 |
| H              | 4.05099600 | 6.81027700  | -0.12347000 | C            | 1.42327300  | 6.12254100  | -2.16844700 |
| H              | 4.97793700 | 6.82278800  | 1.37988000  | C            | 1.37534800  | 4.78521300  | -2.55385900 |
| H              | 5.50692800 | 7.82446000  | -0.01066400 | C            | 2.47162500  | 4.16343800  | -3.16352300 |
| K              | 7.85275200 | 3.50452900  | -0.95300000 | H            | 2.60433100  | 7.92549500  | -2.13698500 |
|                |            |             |             | H            | 0.56082800  | 6.58499900  | -1.69708700 |
|                |            |             |             | H            | 0.47489500  | 4.20177000  | -2.37899800 |
| <b>75-TS-i</b> |            |             |             | O            | 4.71792400  | 4.35544900  | -4.00556200 |
| C              | 5.78371400 | -1.09362600 | -4.77978400 | C            | 5.80583600  | 3.99883900  | -3.18384900 |
| C              | 4.61108200 | -0.49262400 | -5.27264300 | Pd           | 5.50786700  | 2.20950800  | -2.26339800 |
| C              | 3.42223500 | -1.23803600 | -5.22282500 | C            | 4.92326200  | 7.11870600  | -3.31348100 |
| C              | 3.40151300 | -2.53812700 | -4.70972600 | H            | 4.65925000  | 8.16970500  | -3.46288600 |
| C              | 4.58636600 | -3.11939900 | -4.24281800 | H            | 5.65224200  | 7.08661900  | -2.49154000 |
| C              | 5.79419400 | -2.41092100 | -4.28084600 | H            | 5.43377700  | 6.75515600  | -4.20881900 |
| H              | 2.51071200 | -0.79690500 | -5.61850500 | C            | 4.10025800  | -0.44311100 | -1.26964300 |
| H              | 2.47592100 | -3.10836300 | -4.70688500 | O            | 3.32725600  | -0.60480100 | -2.29936700 |
| H              | 4.58233400 | -4.14113100 | -3.87108800 | C            | 2.40579900  | 2.70918200  | -3.55466100 |
| O              | 7.00492300 | -0.45311200 | -4.86137600 | H            | 3.16548700  | 2.44203800  | -4.28964700 |
| C              | 7.24400400 | 0.64434100  | -3.99686300 | H            | 2.56009000  | 2.06854700  | -2.67814100 |
| H              | 6.58227500 | 1.49030700  | -4.19377600 | H            | 1.42098300  | 2.46237400  | -3.96496200 |
| Pd             | 6.49568900 | 0.37154400  | -1.99772000 | C            | 5.58191600  | 0.24046600  | -4.46836400 |
| C              | 4.63018300 | 0.89059300  | -5.87031200 |              |             |             |             |

|                |             |             |             |                |             |             |             |
|----------------|-------------|-------------|-------------|----------------|-------------|-------------|-------------|
| H              | 6.08518900  | 0.67408000  | -5.34322600 | O              | 0.00213600  | 1.78474400  | 0.35149300  |
| H              | 6.15972600  | 1.62454800  | -3.61391900 | O              | 0.01071300  | 1.74103300  | 2.57406800  |
| H              | 6.20968300  | -0.35839100 | -3.79337200 | C              | 1.24263100  | 3.48332300  | 1.48872800  |
| O              | 4.33680600  | 0.10494400  | -4.47667200 | H              | 2.27463200  | 3.13242900  | 1.37542700  |
| H              | 3.78082500  | -0.32929500 | -3.21039900 | H              | 1.00237400  | 4.14765600  | 0.65648200  |
| H              | 6.68989400  | 3.95539000  | -3.81945500 | H              | 1.15341700  | 4.01175900  | 2.43800500  |
| H              | 5.93731500  | 4.72914300  | -2.37626000 | K              | 0.84526400  | 1.49356500  | -2.18107000 |
| O              | 5.27847300  | -0.03070400 | -1.33776600 | I              | -3.22337700 | -1.85089600 | 0.52978900  |
| K              | 7.36878100  | 0.92422800  | 0.06198800  | I              | -2.73830300 | 1.44226000  | -1.54026200 |
| K              | 7.36665200  | 5.18169100  | 0.08994400  | C              | 0.79303100  | -1.47574300 | -4.39221200 |
| I              | 4.43118600  | 3.23076700  | 0.16002100  | O              | 0.45903300  | -0.45701100 | -3.69171600 |
| C              | 3.46314400  | -0.74358900 | 0.05988200  | O              | 0.16790800  | -2.56326500 | -4.41341700 |
| H              | 4.17974800  | -1.24655100 | 0.71359400  | C              | 2.06000000  | -1.33520500 | -5.23858400 |
| H              | 3.21171100  | 0.22121200  | 0.51682900  | H              | 2.21453200  | -2.21451200 | -5.86520700 |
| H              | 2.55873600  | -1.34166600 | -0.05167500 | H              | 1.99272900  | -0.43864500 | -5.86330000 |
| C              | 9.92782500  | 3.60515000  | 0.21738500  | H              | 2.92802100  | -1.20751600 | -4.58063300 |
| O              | 8.87304400  | 2.89278700  | 0.37635900  | K              | -1.90441900 | -1.81885100 | -3.01349400 |
| O              | 9.93034000  | 4.84530600  | 0.03074200  |                |             |             |             |
| C              | 11.26248600 | 2.85917800  | 0.25080800  | <b>77-TS-b</b> |             |             |             |
| H              | 11.30908100 | 2.16111400  | -0.59305100 | Pd             | -1.39597500 | 0.58646400  | 0.42213700  |
| H              | 12.10248100 | 3.55240700  | 0.18990900  | C              | 1.03531500  | -1.66404400 | 0.18300000  |
| H              | 11.33463100 | 2.26675800  | 1.16880600  | C              | 0.52825000  | -2.05640900 | -1.07162200 |
|                |             |             |             | C              | 1.37094000  | -1.94996100 | -2.18658900 |
| <b>77-TS-a</b> |             |             |             | C              | 2.67622500  | -1.46136100 | -2.05822900 |
| Pd             | -1.45399400 | 0.19433400  | 0.55134700  | C              | 3.16801300  | -1.13287200 | -0.79491800 |
| C              | 1.72643100  | -0.99118300 | 1.10343800  | C              | 2.36999200  | -1.25676000 | 0.35151600  |
| C              | 1.82931700  | -1.37568000 | -0.24716900 | H              | 1.00878800  | -2.28836300 | -3.15647700 |
| C              | 2.82897100  | -0.78302600 | -1.03012200 | H              | 3.32189200  | -1.39207400 | -2.92959700 |
| C              | 3.70516800  | 0.16015300  | -0.48079500 | H              | 4.20241300  | -0.81668200 | -0.68273000 |
| C              | 3.61994300  | 0.47557400  | 0.87722000  | O              | 0.18800200  | -1.81106600 | 1.25752000  |
| C              | 2.65101400  | -0.11532800 | 1.70070200  | C              | -0.28613100 | -0.67280000 | 1.98231300  |
| H              | 2.92147200  | -1.07846400 | -2.07222600 | H              | -1.20819600 | -0.97970200 | 2.46577700  |
| H              | 4.48500600  | 0.60331400  | -1.09510900 | H              | 0.40933100  | -0.43673600 | 2.80473800  |
| H              | 4.34596200  | 1.15225100  | 1.32229500  | C              | -0.87797500 | -2.59034800 | -1.18526900 |
| O              | 0.75063600  | -1.61484900 | 1.84443500  | H              | -1.10286200 | -2.89201500 | -2.21232800 |
| C              | -0.36527400 | -0.88013700 | 2.35068200  | H              | -1.01974900 | -3.45312500 | -0.52764600 |
| H              | -1.19159000 | -1.58052700 | 2.41944900  | H              | -1.61775100 | -1.84602300 | -0.87046200 |
| H              | -0.16252800 | -0.57409700 | 3.39219800  | C              | 2.94091400  | -1.02077400 | 1.72877900  |
| C              | 0.91882600  | -2.44402200 | -0.79590300 | H              | 2.72296400  | -0.01282500 | 2.09268700  |
| H              | -0.12045100 | -2.25562200 | -0.51024700 | H              | 2.51128200  | -1.72956200 | 2.44284300  |
| H              | 0.99932100  | -2.52287000 | -1.88207600 | H              | 4.02643300  | -1.15240300 | 1.72264400  |
| H              | 1.17340800  | -3.41681100 | -0.35952500 | H              | 0.15731700  | 0.61068300  | 1.65595400  |
| C              | 2.64983700  | 0.10743700  | 3.19402600  | C              | 1.23684500  | 1.84400400  | 0.37823900  |
| H              | 1.95034700  | 0.89142300  | 3.49544600  | O              | 0.40915100  | 1.44699400  | -0.49854500 |
| H              | 2.35334000  | -0.81090200 | 3.70932200  | O              | 1.10042800  | 1.58454700  | 1.61064700  |
| H              | 3.64770200  | 0.39111500  | 3.54015800  | C              | 2.45987900  | 2.60321700  | -0.07682200 |
| H              | -0.36164900 | 0.53999300  | 2.28264200  | H              | 3.20357300  | 1.86706800  | -0.40143400 |
| C              | 0.34790400  | 2.27039300  | 1.47011900  | H              | 2.21775800  | 3.24893100  | -0.92341500 |

|   |             |             |             |
|---|-------------|-------------|-------------|
| H | 2.87686900  | 3.18803200  | 0.74319900  |
| C | -3.13291500 | 0.97639500  | -2.18094300 |
| O | -2.79705100 | 0.65713600  | -3.33629500 |
| O | -2.23692400 | 1.36990200  | -1.31200600 |
| C | -4.59305100 | 0.97615800  | -1.78663100 |
| H | -4.86318700 | -0.01721200 | -1.41610700 |
| H | -4.78250100 | 1.68673100  | -0.98211700 |
| H | -5.20279200 | 1.19619700  | -2.66539800 |
| K | -0.18267400 | 0.85534900  | -2.97934400 |
| I | -3.69222900 | -0.19183200 | 1.55279800  |

**77-TS-c**

|    |             |             |             |
|----|-------------|-------------|-------------|
| Pd | -1.47440100 | 0.53405900  | 0.42182600  |
| C  | 0.65514900  | -2.04100300 | 0.18353500  |
| C  | -0.03298900 | -2.61891300 | -0.90719200 |
| C  | 0.65695500  | -2.78350800 | -2.11701300 |
| C  | 1.99012900  | -2.37133100 | -2.25055100 |
| C  | 2.65676100  | -1.83212700 | -1.14744200 |
| C  | 2.01622100  | -1.68835200 | 0.09255800  |
| H  | 0.15139300  | -3.26908400 | -2.94992600 |
| H  | 2.52039900  | -2.52635700 | -3.18676500 |
| H  | 3.70898800  | -1.56982300 | -1.22814200 |
| O  | -0.03282600 | -1.97588400 | 1.36184400  |
| C  | -0.31925900 | -0.72955300 | 2.02048500  |
| H  | -1.22000300 | -0.90211900 | 2.60092800  |
| H  | 0.47388400  | -0.52885800 | 2.76008600  |
| C  | -1.46075400 | -3.07045800 | -0.73646500 |
| H  | -1.84442500 | -3.51736200 | -1.65811200 |
| H  | -1.53589600 | -3.80864800 | 0.06777200  |
| H  | -2.11319100 | -2.24084500 | -0.44685800 |
| C  | 2.78913600  | -1.27230100 | 1.32073800  |
| H  | 2.61734300  | -0.22896700 | 1.59616100  |
| H  | 2.48448900  | -1.88317600 | 2.17618800  |
| H  | 3.86260700  | -1.40933900 | 1.16452000  |
| H  | 0.20932600  | 0.55670400  | 1.61647300  |
| C  | 1.17996700  | 1.75243100  | 0.28788800  |
| O  | 0.35146200  | 1.32256800  | -0.56860900 |
| O  | 1.07111900  | 1.49712000  | 1.52868100  |
| C  | 2.37374700  | 2.54718300  | -0.17809700 |
| H  | 3.17593100  | 1.84310200  | -0.42783000 |
| H  | 2.12315700  | 3.12557200  | -1.06894200 |
| H  | 2.72873000  | 3.20283500  | 0.61758600  |
| K  | -0.07099900 | 0.18294100  | -2.83760300 |
| I  | -3.74425300 | -0.29316100 | 1.57371300  |
| I  | -2.89363200 | 1.67029400  | -1.62879100 |

**Table 3. Cartesian Coordinates and Energies for key intermediates and transition states using different DFT functionals.**

**29 (M06-2X/6-311++G(d,p)-LANL2DZ(SMD)//M06-2X/6-31G(d,p)-LANL2DZ)**

| Center Number                              | Atomic Number | Atomic Type | Coordinates (Angstroms)     |           |           |
|--------------------------------------------|---------------|-------------|-----------------------------|-----------|-----------|
|                                            |               |             | X                           | Y         | Z         |
| 1                                          | 6             | 0           | 2.393440                    | 1.220146  | -1.309941 |
| 2                                          | 6             | 0           | 3.321338                    | 0.176051  | -1.428691 |
| 3                                          | 6             | 0           | 4.500457                    | 0.269595  | -0.684687 |
| 4                                          | 6             | 0           | 4.770517                    | 1.389372  | 0.099410  |
| 5                                          | 6             | 0           | 3.860347                    | 2.443386  | 0.136481  |
| 6                                          | 6             | 0           | 2.652734                    | 2.383857  | -0.567574 |
| 7                                          | 1             | 0           | 5.219493                    | -0.542203 | -0.744526 |
| 8                                          | 1             | 0           | 5.701603                    | 1.454632  | 0.653856  |
| 9                                          | 1             | 0           | 4.084914                    | 3.339442  | 0.708995  |
| 10                                         | 8             | 0           | 1.229987                    | 1.110734  | -2.050761 |
| 11                                         | 6             | 0           | 0.026254                    | 1.188634  | -1.387395 |
| 12                                         | 1             | 0           | -0.714076                   | 1.626706  | -2.057428 |
| 13                                         | 46            | 0           | -0.595297                   | -0.649112 | -0.995531 |
| 14                                         | 6             | 0           | 3.094858                    | -0.959390 | -2.388121 |
| 15                                         | 1             | 0           | 3.657709                    | -1.841797 | -2.078172 |
| 16                                         | 1             | 0           | 2.041842                    | -1.232815 | -2.455815 |
| 17                                         | 1             | 0           | 3.431429                    | -0.663138 | -3.387819 |
| 18                                         | 1             | 0           | 0.086073                    | 1.600486  | -0.370656 |
| 19                                         | 53            | 0           | -3.240577                   | 0.103840  | -1.165039 |
| 20                                         | 19            | 0           | 2.201834                    | 0.395389  | 1.811246  |
| 21                                         | 53            | 0           | 1.074172                    | -2.503114 | 0.307411  |
| 22                                         | 6             | 0           | -0.603166                   | 1.037795  | 2.452116  |
| 23                                         | 8             | 0           | 0.065141                    | 0.118558  | 3.048573  |
| 24                                         | 8             | 0           | -1.891242                   | 1.042603  | 2.523184  |
| 25                                         | 19            | 0           | -1.767913                   | -1.497205 | 2.314481  |
| 26                                         | 19            | 0           | -2.292961                   | 2.784406  | 0.836620  |
| 27                                         | 8             | 0           | 0.012405                    | 1.924520  | 1.708391  |
| 28                                         | 6             | 0           | 1.698584                    | 3.550245  | -0.523919 |
| 29                                         | 1             | 0           | 1.126279                    | 3.624497  | -1.452533 |
| 30                                         | 1             | 0           | 1.008166                    | 3.437394  | 0.320401  |
| 31                                         | 1             | 0           | 2.258950                    | 4.478835  | -0.393347 |
| Zero-point correction=                     |               |             | 0.200936 (Hartree/Particle) |           |           |
| Thermal correction to Energy=              |               |             | 0.226058                    |           |           |
| Thermal correction to Enthalpy=            |               |             | 0.227002                    |           |           |
| Thermal correction to Gibbs Free Energy=   |               |             | 0.140249                    |           |           |
| Sum of electronic and zero-point Energies= |               |             | -2637.435097                |           |           |
| Sum of electronic and thermal Energies=    |               |             | -2637.409976                |           |           |



Sum of electronic and thermal Enthalpies= -2637.409031

Sum of electronic and thermal Free Energies= -2637.495784

M06-2X/6-311++G(d,p)-LANL2DZ(SMD)//M06-2X/6-31G(d,p)-LANL2DZ energy in DMAc solvent = -2638.00845

### 33 (M06-2X/6-311++G(d,p)-LANL2DZ(SMD)//M06-2X/6-31G(d,p)-LANL2DZ)

| Center<br>Number | Atomic<br>Number | Atomic<br>Type | Coordinates (Angstroms) |           |           |
|------------------|------------------|----------------|-------------------------|-----------|-----------|
|                  |                  |                | X                       | Y         | Z         |
| 1                | 6                | 0              | -3.007625               | 2.081413  | 0.129135  |
| 2                | 6                | 0              | -3.210922               | 3.436796  | 0.406673  |
| 3                | 6                | 0              | -4.436957               | 4.001341  | 0.057467  |
| 4                | 6                | 0              | -5.430816               | 3.233986  | -0.541726 |
| 5                | 6                | 0              | -5.205587               | 1.886739  | -0.800424 |
| 6                | 6                | 0              | -3.989520               | 1.285541  | -0.471954 |
| 7                | 1                | 0              | -4.610714               | 5.053496  | 0.264637  |
| 8                | 1                | 0              | -6.380545               | 3.686060  | -0.807373 |
| 9                | 1                | 0              | -5.978182               | 1.285878  | -1.271583 |
| 10               | 8                | 0              | -1.764182               | 1.559824  | 0.437542  |
| 11               | 6                | 0              | -1.725527               | 0.604613  | 1.495699  |
| 12               | 1                | 0              | -2.571200               | 0.763000  | 2.179140  |
| 13               | 46               | 0              | -1.827358               | -1.187714 | 0.690058  |
| 14               | 6                | 0              | -2.118076               | 4.237503  | 1.062682  |
| 15               | 1                | 0              | -2.466321               | 5.244841  | 1.298269  |
| 16               | 1                | 0              | -1.781733               | 3.759756  | 1.987246  |
| 17               | 1                | 0              | -1.241599               | 4.324104  | 0.412671  |
| 18               | 1                | 0              | -0.757243               | 0.691603  | 1.983396  |
| 19               | 6                | 0              | 0.511536                | -1.722028 | -2.047981 |
| 20               | 8                | 0              | -0.833488               | -1.600688 | -2.035060 |
| 21               | 8                | 0              | 1.025674                | -2.735190 | -1.488062 |
| 22               | 6                | 0              | -3.748111               | -0.170160 | -0.765019 |
| 23               | 1                | 0              | -2.805948               | -0.342635 | -1.305825 |
| 24               | 1                | 0              | -3.809438               | -0.777412 | 0.168885  |
| 25               | 1                | 0              | -4.541603               | -0.589606 | -1.386639 |
| 26               | 6                | 0              | -3.131949               | -3.573708 | -0.775302 |
| 27               | 1                | 0              | -3.877678               | -3.569311 | 0.039142  |
| 28               | 1                | 0              | -3.100672               | -4.602007 | -1.170493 |
| 29               | 8                | 0              | -1.874843               | -3.146753 | -0.348258 |
| 30               | 1                | 0              | -3.539040               | -2.943276 | -1.587911 |
| 31               | 1                | 0              | -1.225418               | -2.357947 | -1.445673 |
| 32               | 6                | 0              | 1.036910                | -1.292788 | 1.318292  |
| 33               | 8                | 0              | 1.085381                | -0.158247 | 0.721250  |
| 34               | 8                | 0              | -0.100846               | -1.796622 | 1.719345  |
| 35               | 19               | 0              | 0.390037                | 1.280993  | -1.266783 |
| 36               | 53               | 0              | 3.822971                | 2.135017  | -0.430859 |
| 37               | 19               | 0              | 0.342857                | -4.042145 | 0.571402  |
| 38               | 8                | 0              | 2.113507                | -1.945782 | 1.560398  |

|    |    |   |          |           |           |
|----|----|---|----------|-----------|-----------|
| 39 | 8  | 0 | 1.157566 | -0.779616 | -2.573954 |
| 40 | 19 | 0 | 3.021552 | 0.470195  | 2.328335  |
| 41 | 19 | 0 | 3.108612 | -1.255281 | -0.928528 |

---

|                                              |                             |
|----------------------------------------------|-----------------------------|
| Zero-point correction=                       | 0.272417 (Hartree/Particle) |
| Thermal correction to Energy=                | 0.305342                    |
| Thermal correction to Enthalpy=              | 0.306287                    |
| Thermal correction to Gibbs Free Energy=     | 0.203372                    |
| Sum of electronic and zero-point Energies=   | -3605.364649                |
| Sum of electronic and thermal Energies=      | -3605.331724                |
| Sum of electronic and thermal Enthalpies=    | -3605.330780                |
| Sum of electronic and thermal Free Energies= | -3605.433695                |

M06-2X/6-311++G(d,p)-LANL2DZ(SMD)//M06-2X/6-31G(d,p)-LANL2DZ energy in DMAc solvent = -3606.1808127

### 34-TS (M06-2X/6-311++G(d,p)-LANL2DZ(SMD)//M06-2X/6-31G(d,p)-LANL2DZ)

---

| Center<br>Number | Atomic<br>Number | Atomic<br>Type | Coordinates (Angstroms) |           |           |
|------------------|------------------|----------------|-------------------------|-----------|-----------|
|                  |                  |                | X                       | Y         | Z         |
| 1                | 6                | 0              | 3.477533                | -1.731195 | -0.082368 |
| 2                | 6                | 0              | 4.325035                | -2.502087 | 0.722451  |
| 3                | 6                | 0              | 5.626607                | -2.729169 | 0.271136  |
| 4                | 6                | 0              | 6.064575                | -2.212841 | -0.942470 |
| 5                | 6                | 0              | 5.190826                | -1.476432 | -1.736329 |
| 6                | 6                | 0              | 3.881011                | -1.227911 | -1.324768 |
| 7                | 1                | 0              | 6.295424                | -3.330138 | 0.881799  |
| 8                | 1                | 0              | 7.080378                | -2.396457 | -1.277373 |
| 9                | 1                | 0              | 5.522591                | -1.087162 | -2.695057 |
| 10               | 8                | 0              | 2.177329                | -1.501640 | 0.326056  |
| 11               | 6                | 0              | 2.036745                | -0.585385 | 1.416674  |
| 12               | 1                | 0              | 2.912446                | -0.640996 | 2.063988  |
| 13               | 46               | 0              | 1.666758                | 1.283621  | 0.778191  |
| 14               | 6                | 0              | 3.843453                | -3.104348 | 2.017895  |
| 15               | 1                | 0              | 4.318518                | -4.074576 | 2.182301  |
| 16               | 1                | 0              | 4.086676                | -2.469535 | 2.876557  |
| 17               | 1                | 0              | 2.759956                | -3.242070 | 2.004498  |
| 18               | 1                | 0              | 1.116319                | -0.855248 | 1.942686  |
| 19               | 6                | 0              | -0.486388               | 1.934587  | -2.057310 |
| 20               | 8                | 0              | 0.871086                | 2.085332  | -2.083517 |
| 21               | 8                | 0              | -1.165787               | 2.920052  | -1.647075 |
| 22               | 6                | 0              | 2.910524                | -0.480920 | -2.198072 |
| 23               | 1                | 0              | 2.198513                | -1.168196 | -2.672873 |
| 24               | 1                | 0              | 2.331795                | 0.264096  | -1.645344 |
| 25               | 1                | 0              | 3.431995                | 0.038717  | -3.005016 |
| 26               | 6                | 0              | 2.943351                | 3.178001  | 0.375806  |
| 27               | 1                | 0              | 3.481124                | 3.527712  | 1.264788  |
| 28               | 1                | 0              | 3.567651                | 3.008680  | -0.510533 |

|    |    |   |           |           |           |
|----|----|---|-----------|-----------|-----------|
| 29 | 8  | 0 | 1.713373  | 3.499244  | 0.220277  |
| 30 | 1  | 0 | 3.250210  | 1.578389  | 0.881051  |
| 31 | 1  | 0 | 1.081521  | 2.897788  | -1.593195 |
| 32 | 6  | 0 | -1.344208 | 0.500211  | 1.379646  |
| 33 | 8  | 0 | -1.145526 | -0.655008 | 1.858180  |
| 34 | 8  | 0 | -0.461999 | 1.030625  | 0.560681  |
| 35 | 19 | 0 | -0.287294 | -1.244215 | -0.826574 |
| 36 | 53 | 0 | -3.792564 | -2.075142 | -0.695264 |
| 37 | 19 | 0 | -0.897395 | 3.514031  | 0.830227  |
| 38 | 8  | 0 | -2.424501 | 1.182149  | 1.582224  |
| 39 | 8  | 0 | -0.916883 | 0.821038  | -2.424023 |
| 40 | 19 | 0 | -3.545703 | -1.046581 | 2.470678  |
| 41 | 19 | 0 | -3.116514 | 1.221793  | -1.097608 |

---

|                                              |                             |
|----------------------------------------------|-----------------------------|
| Zero-point correction=                       | 0.268404 (Hartree/Particle) |
| Thermal correction to Energy=                | 0.301418                    |
| Thermal correction to Enthalpy=              | 0.302362                    |
| Thermal correction to Gibbs Free Energy=     | 0.198607                    |
| Sum of electronic and zero-point Energies=   | -3605.341372                |
| Sum of electronic and thermal Energies=      | -3605.308358                |
| Sum of electronic and thermal Enthalpies=    | -3605.307414                |
| Sum of electronic and thermal Free Energies= | -3605.411169                |

M06-2X/6-311++G(d,p)-LANL2DZ(SMD)//M06-2X/6-31G(d,p)-LANL2DZ energy in DMAc solvent = -3606.1528391

### 39 (M06-2X/6-311++G(d,p)-LANL2DZ(SMD)//M06-2X/6-31G(d,p)-LANL2DZ)

---

| Center<br>Number | Atomic<br>Number | Atomic<br>Type | Coordinates (Angstroms) |           |           |
|------------------|------------------|----------------|-------------------------|-----------|-----------|
|                  |                  |                | X                       | Y         | Z         |
| 1                | 46               | 0              | 0.884578                | 1.137460  | 1.051140  |
| 2                | 6                | 0              | 4.204548                | -0.842015 | -0.051923 |
| 3                | 6                | 0              | 5.195671                | 0.089187  | 0.274836  |
| 4                | 6                | 0              | 6.521775                | -0.350910 | 0.256801  |
| 5                | 6                | 0              | 6.841932                | -1.663391 | -0.071699 |
| 6                | 6                | 0              | 5.832270                | -2.566243 | -0.393362 |
| 7                | 6                | 0              | 4.496514                | -2.168302 | -0.387008 |
| 8                | 1                | 0              | 7.310084                | 0.356111  | 0.501270  |
| 9                | 1                | 0              | 7.878944                | -1.983366 | -0.079954 |
| 10               | 1                | 0              | 6.078430                | -3.593323 | -0.649304 |
| 11               | 8                | 0              | 2.879847                | -0.446198 | -0.099404 |
| 12               | 6                | 0              | 2.232738                | -0.298524 | 1.173446  |
| 13               | 1                | 0              | 1.725677                | -1.235084 | 1.436997  |
| 14               | 1                | 0              | 2.974667                | -0.025296 | 1.933745  |
| 15               | 6                | 0              | 4.841566                | 1.508984  | 0.633732  |
| 16               | 1                | 0              | 5.654908                | 2.184607  | 0.357344  |
| 17               | 1                | 0              | 4.688977                | 1.611889  | 1.714425  |
| 18               | 6                | 0              | 3.378812                | -3.113503 | -0.741890 |

|    |    |   |           |           |           |
|----|----|---|-----------|-----------|-----------|
| 19 | 1  | 0 | 2.590371  | -3.102597 | 0.015541  |
| 20 | 1  | 0 | 2.909057  | -2.833127 | -1.691526 |
| 21 | 1  | 0 | 3.753648  | -4.134599 | -0.841283 |
| 22 | 1  | 0 | 3.920429  | 1.843175  | 0.148259  |
| 23 | 6  | 0 | 0.557693  | 2.910641  | -0.589747 |
| 24 | 8  | 0 | -0.249021 | 2.981331  | 0.429925  |
| 25 | 8  | 0 | 1.797802  | 2.544633  | -0.311665 |
| 26 | 8  | 0 | 0.150476  | 2.985721  | -1.785186 |
| 27 | 19 | 0 | 1.461932  | 0.652223  | -2.063851 |
| 28 | 6  | 0 | -0.897873 | -1.019456 | 0.273718  |
| 29 | 8  | 0 | -0.653898 | -0.321875 | 1.359235  |
| 30 | 8  | 0 | -1.407508 | -2.180854 | 0.419933  |
| 31 | 19 | 0 | -2.128774 | 1.860314  | -0.792033 |
| 32 | 53 | 0 | -4.749728 | -0.322134 | -0.093864 |
| 33 | 19 | 0 | -2.699149 | -1.341352 | 2.483010  |
| 34 | 8  | 0 | -0.704754 | -0.509425 | -0.900787 |
| 35 | 19 | 0 | -2.538094 | -2.207181 | -1.805073 |

---

|                                              |                             |
|----------------------------------------------|-----------------------------|
| Zero-point correction=                       | 0.218406 (Hartree/Particle) |
| Thermal correction to Energy=                | 0.247838                    |
| Thermal correction to Enthalpy=              | 0.248783                    |
| Thermal correction to Gibbs Free Energy=     | 0.152517                    |
| Sum of electronic and zero-point Energies=   | -3489.708114                |
| Sum of electronic and thermal Energies=      | -3489.678682                |
| Sum of electronic and thermal Enthalpies=    | -3489.677738                |
| Sum of electronic and thermal Free Energies= | -3489.774003                |

M06-2X/6-311++G(d,p)-LANL2DZ(SMD)//M06-2X/6-31G(d,p)-LANL2DZ energy in DMAc solvent = -3490.439456

#### 40-TS (M06-2X/6-311++G(d,p)-LANL2DZ(SMD)//M06-2X/6-31G(d,p)-LANL2DZ)

---

| Center Number | Atomic Number | Atomic Type | Coordinates (Angstroms) |           |           |
|---------------|---------------|-------------|-------------------------|-----------|-----------|
|               |               |             | X                       | Y         | Z         |
| 1             | 46            | 0           | -1.127103               | -0.862707 | 1.051096  |
| 2             | 6             | 0           | -3.926262               | 0.908296  | 0.304259  |
| 3             | 6             | 0           | -4.350347               | -0.386865 | 0.650120  |
| 4             | 6             | 0           | -5.698770               | -0.687534 | 0.408323  |
| 5             | 6             | 0           | -6.575796               | 0.234766  | -0.142111 |
| 6             | 6             | 0           | -6.119012               | 1.506559  | -0.478796 |
| 7             | 6             | 0           | -4.791088               | 1.858371  | -0.261190 |
| 8             | 1             | 0           | -6.050127               | -1.684985 | 0.655946  |
| 9             | 1             | 0           | -7.613152               | -0.035288 | -0.310263 |
| 10            | 1             | 0           | -6.797941               | 2.239370  | -0.906150 |
| 11            | 8             | 0           | -2.618548               | 1.338115  | 0.420766  |
| 12            | 6             | 0           | -1.856402               | 0.909573  | 1.529414  |
| 13            | 1             | 0           | -1.026471               | 1.611855  | 1.635282  |
| 14            | 1             | 0           | -2.479081               | 0.873917  | 2.431080  |

|    |    |   |           |           |           |
|----|----|---|-----------|-----------|-----------|
| 15 | 6  | 0 | -3.421445 | -1.463484 | 1.125518  |
| 16 | 1  | 0 | -3.936591 | -2.427821 | 1.148944  |
| 17 | 1  | 0 | -3.074802 | -1.317282 | 2.157832  |
| 18 | 6  | 0 | -4.267973 | 3.227949  | -0.606966 |
| 19 | 1  | 0 | -3.801239 | 3.701158  | 0.261155  |
| 20 | 1  | 0 | -3.498497 | 3.184263  | -1.386395 |
| 21 | 1  | 0 | -5.076171 | 3.868613  | -0.965828 |
| 22 | 1  | 0 | -2.736768 | -1.780082 | 0.083089  |
| 23 | 6  | 0 | -1.053366 | -2.360320 | -1.233666 |
| 24 | 8  | 0 | -0.507266 | -2.714079 | -0.102235 |
| 25 | 8  | 0 | -2.322151 | -2.035553 | -1.236117 |
| 26 | 8  | 0 | -0.360564 | -2.188706 | -2.282297 |
| 27 | 19 | 0 | -1.537149 | 0.258167  | -2.096695 |
| 28 | 6  | 0 | 1.057599  | 0.979662  | 0.285942  |
| 29 | 8  | 0 | 0.855334  | -0.037912 | 1.104033  |
| 30 | 8  | 0 | 1.628830  | 2.020012  | 0.751616  |
| 31 | 19 | 0 | 1.763594  | -1.785271 | -0.860616 |
| 32 | 53 | 0 | 4.763688  | -0.064304 | -0.167080 |
| 33 | 19 | 0 | 2.844467  | 0.637531  | 2.554347  |
| 34 | 8  | 0 | 0.755165  | 0.864072  | -0.957388 |
| 35 | 19 | 0 | 2.825557  | 2.391126  | -1.458717 |

-----

Zero-point correction= 0.214213 (Hartree/Particle)  
Thermal correction to Energy= 0.242525  
Thermal correction to Enthalpy= 0.243469  
Thermal correction to Gibbs Free Energy= 0.151172  
Sum of electronic and zero-point Energies= -3489.690721  
Sum of electronic and thermal Energies= -3489.662409  
Sum of electronic and thermal Enthalpies= -3489.661464  
Sum of electronic and thermal Free Energies= -3489.753762

M06-2X/6-311++G(d,p)-LANL2DZ(SMD)//M06-2X/6-31G(d,p)-LANL2DZ energy in DMAc solvent = -3490.4181203

**66 (M06-2X/6-311++G(d,p)-LANL2DZ(SMD)//M06-2X/6-31G(d,p)-LANL2DZ)**

-----

| Center<br>Number | Atomic<br>Number | Atomic<br>Type | Coordinates (Angstroms) |           |           |
|------------------|------------------|----------------|-------------------------|-----------|-----------|
|                  |                  |                | X                       | Y         | Z         |
| 1                | 6                | 0              | -3.621351               | 0.298023  | 0.189077  |
| 2                | 6                | 0              | -3.565727               | -0.581700 | 1.286725  |
| 3                | 6                | 0              | -3.645765               | -1.950160 | 1.026395  |
| 4                | 6                | 0              | -3.775762               | -2.421505 | -0.274757 |
| 5                | 6                | 0              | -3.835336               | -1.534368 | -1.345187 |
| 6                | 6                | 0              | -3.760146               | -0.157845 | -1.137791 |
| 7                | 1                | 0              | -3.587904               | -2.648960 | 1.855012  |
| 8                | 1                | 0              | -3.820382               | -3.489589 | -0.457970 |
| 9                | 1                | 0              | -3.943468               | -1.909450 | -2.358520 |
| 10               | 8                | 0              | -3.645345               | 1.673927  | 0.445863  |

|    |    |   |           |           |           |
|----|----|---|-----------|-----------|-----------|
| 11 | 6  | 0 | -2.352347 | 2.204139  | 0.241502  |
| 12 | 1  | 0 | -2.043083 | 2.800808  | 1.102079  |
| 13 | 46 | 0 | -1.221850 | 0.579874  | 0.080818  |
| 14 | 6  | 0 | -3.490467 | -0.035840 | 2.688617  |
| 15 | 1  | 0 | -3.247406 | -0.831875 | 3.394643  |
| 16 | 1  | 0 | -2.736173 | 0.750068  | 2.776422  |
| 17 | 1  | 0 | -4.449550 | 0.404778  | 2.978217  |
| 18 | 1  | 0 | -2.281905 | 2.757176  | -0.701185 |
| 19 | 53 | 0 | 0.983476  | 2.195648  | -0.041178 |
| 20 | 19 | 0 | 2.308580  | -0.326281 | -2.092540 |
| 21 | 53 | 0 | 0.084713  | -2.016779 | -0.123735 |
| 22 | 6  | 0 | 5.158534  | -0.507382 | 0.253607  |
| 23 | 8  | 0 | 4.109403  | -0.480594 | -0.473623 |
| 24 | 8  | 0 | 5.155485  | -0.518668 | 1.499570  |
| 25 | 6  | 0 | 6.492473  | -0.532675 | -0.482900 |
| 26 | 1  | 0 | 7.323154  | -0.517394 | 0.221320  |
| 27 | 1  | 0 | 6.547124  | -1.433915 | -1.099817 |
| 28 | 1  | 0 | 6.555779  | 0.328415  | -1.153390 |
| 29 | 19 | 0 | 2.616857  | -0.447630 | 1.740078  |
| 30 | 6  | 0 | -3.868162 | 0.832234  | -2.268256 |
| 31 | 1  | 0 | -4.475803 | 1.689556  | -1.967799 |
| 32 | 1  | 0 | -2.883848 | 1.212115  | -2.562181 |
| 33 | 1  | 0 | -4.320762 | 0.363445  | -3.143963 |

-----

Zero-point correction= 0.233073 (Hartree/Particle)

Thermal correction to Energy= 0.259408

Thermal correction to Enthalpy= 0.260353

Thermal correction to Gibbs Free Energy= 0.168362

Sum of electronic and zero-point Energies= -2002.121904

Sum of electronic and thermal Energies= -2002.095568

Sum of electronic and thermal Enthalpies= -2002.094624

Sum of electronic and thermal Free Energies= -2002.186614

M06-2X/6-311++G(d,p)-LANL2DZ(SMD)//M06-2X/6-31G(d,p)-LANL2DZ energy in DMAc solvent = -2002.6593252

**68 (M06-2X/6-311++G(d,p)-LANL2DZ(SMD)//M06-2X/6-31G(d,p)-LANL2DZ)**

-----

| Center<br>Number | Atomic<br>Number | Atomic<br>Type | Coordinates (Angstroms) |           |           |
|------------------|------------------|----------------|-------------------------|-----------|-----------|
|                  |                  |                | X                       | Y         | Z         |
| 1                | 46               | 0              | 0.319854                | 0.571181  | 0.469264  |
| 2                | 6                | 0              | -3.337955               | -0.305434 | -0.164839 |
| 3                | 6                | 0              | -3.640703               | -0.174009 | 1.192907  |
| 4                | 6                | 0              | -4.991886               | -0.161713 | 1.547233  |
| 5                | 6                | 0              | -5.991458               | -0.278206 | 0.587831  |
| 6                | 6                | 0              | -5.654338               | -0.407756 | -0.755439 |
| 7                | 6                | 0              | -4.318374               | -0.419146 | -1.153945 |
| 8                | 1                | 0              | -5.254081               | -0.063303 | 2.596822  |

|    |    |   |           |           |           |
|----|----|---|-----------|-----------|-----------|
| 9  | 1  | 0 | -7.034328 | -0.266885 | 0.887214  |
| 10 | 1  | 0 | -6.431986 | -0.492507 | -1.509189 |
| 11 | 8  | 0 | -2.012933 | -0.355982 | -0.588689 |
| 12 | 6  | 0 | -1.308548 | 0.869919  | -0.594451 |
| 13 | 1  | 0 | -0.991881 | 1.109848  | -1.614164 |
| 14 | 1  | 0 | -1.901102 | 1.677625  | -0.155743 |
| 15 | 6  | 0 | -2.555587 | -0.060468 | 2.229719  |
| 16 | 1  | 0 | -2.979615 | -0.154841 | 3.231734  |
| 17 | 1  | 0 | -2.047911 | 0.910505  | 2.176337  |
| 18 | 6  | 0 | -3.921072 | -0.544867 | -2.600831 |
| 19 | 1  | 0 | -3.263389 | 0.274495  | -2.905401 |
| 20 | 1  | 0 | -3.382311 | -1.480240 | -2.788603 |
| 21 | 1  | 0 | -4.802720 | -0.533872 | -3.244450 |
| 22 | 1  | 0 | -1.791231 | -0.830275 | 2.092022  |
| 23 | 6  | 0 | 1.353537  | -1.553268 | 1.690456  |
| 24 | 8  | 0 | 2.100330  | -0.540536 | 1.598990  |
| 25 | 8  | 0 | 0.180759  | -1.557305 | 1.192121  |
| 26 | 6  | 0 | 1.833357  | -2.805156 | 2.380455  |
| 27 | 1  | 0 | 1.066461  | -3.151613 | 3.075902  |
| 28 | 1  | 0 | 1.971756  | -3.577896 | 1.617032  |
| 29 | 1  | 0 | 2.768579  | -2.621966 | 2.908905  |
| 30 | 19 | 0 | 3.463459  | 0.394174  | -0.393136 |
| 31 | 53 | 0 | 1.217050  | 3.028820  | -0.265936 |
| 32 | 6  | 0 | 2.638631  | -2.757584 | -0.946367 |
| 33 | 8  | 0 | 1.883546  | -3.744462 | -0.832424 |
| 34 | 8  | 0 | 2.307323  | -1.624238 | -1.422528 |
| 35 | 6  | 0 | 4.067147  | -2.882712 | -0.407278 |
| 36 | 1  | 0 | 4.112832  | -2.379115 | 0.567525  |
| 37 | 1  | 0 | 4.339197  | -3.927759 | -0.261719 |
| 38 | 1  | 0 | 4.782882  | -2.407024 | -1.084815 |
| 39 | 19 | 0 | -0.257501 | -2.363880 | -1.222306 |

-----  
Zero-point correction= 0.286110 (Hartree/Particle)

Thermal correction to Energy= 0.314269

Thermal correction to Enthalpy= 0.315213

Thermal correction to Gibbs Free Energy= 0.222916

Sum of electronic and zero-point Energies= -2219.113969

Sum of electronic and thermal Energies= -2219.085811

Sum of electronic and thermal Enthalpies= -2219.084867

Sum of electronic and thermal Free Energies= -2219.177163

M06-2X/6-311++G(d,p)-LANL2DZ(SMD)//M06-2X/6-31G(d,p)-LANL2DZ energy in DMAc solvent = -2219.7686156

**69-TS (M06-2X/6-311++G(d,p)-LANL2DZ(SMD)//M06-2X/6-31G(d,p)-LANL2DZ)**

-----  
Center Atomic Atomic Coordinates (Angstroms)  
Number Number Type X Y Z  
-----

|    |    |   |           |           |           |
|----|----|---|-----------|-----------|-----------|
| 1  | 46 | 0 | -0.226972 | -1.171174 | 0.740446  |
| 2  | 6  | 0 | 2.966585  | -0.824723 | -0.344990 |
| 3  | 6  | 0 | 2.952921  | -0.570707 | 1.038600  |
| 4  | 6  | 0 | 4.062027  | 0.121161  | 1.556857  |
| 5  | 6  | 0 | 5.119319  | 0.527352  | 0.758369  |
| 6  | 6  | 0 | 5.099421  | 0.252589  | -0.608660 |
| 7  | 6  | 0 | 4.025137  | -0.421176 | -1.178699 |
| 8  | 1  | 0 | 4.073616  | 0.339454  | 2.621038  |
| 9  | 1  | 0 | 5.960449  | 1.053702  | 1.197028  |
| 10 | 1  | 0 | 5.926504  | 0.558376  | -1.242964 |
| 11 | 8  | 0 | 1.903454  | -1.368589 | -1.025003 |
| 12 | 6  | 0 | 1.019437  | -2.248877 | -0.388211 |
| 13 | 1  | 0 | 0.453105  | -2.744774 | -1.172463 |
| 14 | 1  | 0 | 1.553600  | -2.962155 | 0.246183  |
| 15 | 6  | 0 | 1.783358  | -0.867377 | 1.919345  |
| 16 | 1  | 0 | 1.977308  | -0.469353 | 2.921405  |
| 17 | 1  | 0 | 1.596506  | -1.930728 | 2.081462  |
| 18 | 6  | 0 | 3.966966  | -0.723091 | -2.653031 |
| 19 | 1  | 0 | 3.826586  | -1.793032 | -2.827270 |
| 20 | 1  | 0 | 3.125172  | -0.217720 | -3.138895 |
| 21 | 1  | 0 | 4.886689  | -0.402734 | -3.145975 |
| 22 | 1  | 0 | 0.950599  | 0.276201  | 1.788776  |
| 23 | 6  | 0 | -0.685715 | 1.495653  | 2.091913  |
| 24 | 8  | 0 | -1.430089 | 0.511832  | 1.887688  |
| 25 | 8  | 0 | 0.583662  | 1.463500  | 1.897579  |
| 26 | 6  | 0 | -1.265532 | 2.809358  | 2.545807  |
| 27 | 1  | 0 | -0.559983 | 3.341653  | 3.183058  |
| 28 | 1  | 0 | -1.437332 | 3.398827  | 1.639380  |
| 29 | 1  | 0 | -2.209396 | 2.647743  | 3.068102  |
| 30 | 19 | 0 | -3.238887 | 1.025599  | 0.061959  |
| 31 | 53 | 0 | -2.410800 | -2.094161 | -0.690307 |
| 32 | 6  | 0 | -0.976780 | 3.544759  | -1.305572 |
| 33 | 8  | 0 | 0.171398  | 3.677188  | -1.763396 |
| 34 | 8  | 0 | -1.386209 | 2.529836  | -0.640528 |
| 35 | 6  | 0 | -1.993733 | 4.659981  | -1.531852 |
| 36 | 1  | 0 | -2.375191 | 5.012225  | -0.568702 |
| 37 | 1  | 0 | -1.543764 | 5.490105  | -2.074398 |
| 38 | 1  | 0 | -2.843741 | 4.271289  | -2.100674 |
| 39 | 19 | 0 | 1.116476  | 1.498398  | -0.809291 |

---

|                                              |                             |
|----------------------------------------------|-----------------------------|
| Zero-point correction=                       | 0.281686 (Hartree/Particle) |
| Thermal correction to Energy=                | 0.309074                    |
| Thermal correction to Enthalpy=              | 0.310018                    |
| Thermal correction to Gibbs Free Energy=     | 0.218643                    |
| Sum of electronic and zero-point Energies=   | -2219.076068                |
| Sum of electronic and thermal Energies=      | -2219.048681                |
| Sum of electronic and thermal Enthalpies=    | -2219.047737                |
| Sum of electronic and thermal Free Energies= | -2219.139112                |



M06-2X/6-311++G(d,p)-LANL2DZ(SMD)//M06-2X/6-31G(d,p)-LANL2DZ energy in DMAc solvent = -2219.725315

**72 (M06-2X/6-311++G(d,p)-LANL2DZ(SMD)//M06-2X/6-31G(d,p)-LANL2DZ)**

| Center<br>Number | Atomic<br>Number | Atomic<br>Type | Coordinates (Angstroms) |           |           |
|------------------|------------------|----------------|-------------------------|-----------|-----------|
|                  |                  |                | X                       | Y         | Z         |
| 1                | 6                | 0              | -2.746272               | -1.088547 | 0.915002  |
| 2                | 6                | 0              | -3.690974               | -1.573617 | -0.003180 |
| 3                | 6                | 0              | -4.543846               | -0.645151 | -0.610703 |
| 4                | 6                | 0              | -4.465169               | 0.712963  | -0.300980 |
| 5                | 6                | 0              | -3.537908               | 1.159509  | 0.638351  |
| 6                | 6                | 0              | -2.663562               | 0.267267  | 1.267413  |
| 7                | 1                | 0              | -5.296893               | -1.002326 | -1.308473 |
| 8                | 1                | 0              | -5.143785               | 1.418438  | -0.770455 |
| 9                | 1                | 0              | -3.472305               | 2.212047  | 0.898170  |
| 10               | 8                | 0              | -1.890085               | -1.980046 | 1.537964  |
| 11               | 6                | 0              | -0.852924               | -2.479176 | 0.725073  |
| 12               | 1                | 0              | -1.168839               | -2.639771 | -0.308039 |
| 13               | 46               | 0              | 0.489633                | -1.078149 | 1.017273  |
| 14               | 6                | 0              | -3.817846               | -3.049069 | -0.289563 |
| 15               | 1                | 0              | -4.855112               | -3.297996 | -0.523424 |
| 16               | 1                | 0              | -3.203993               | -3.360252 | -1.141784 |
| 17               | 1                | 0              | -3.503687               | -3.637951 | 0.574592  |
| 18               | 1                | 0              | -0.464056               | -3.394592 | 1.182687  |
| 19               | 6                | 0              | 4.422344                | 0.600216  | 0.026739  |
| 20               | 8                | 0              | 3.985074                | -0.104684 | 1.029356  |
| 21               | 8                | 0              | 3.862293                | 1.599735  | -0.420352 |
| 22               | 6                | 0              | -1.662777               | 0.753169  | 2.278831  |
| 23               | 1                | 0              | -1.513053               | 0.018808  | 3.074065  |
| 24               | 1                | 0              | -0.695830               | 0.976059  | 1.804628  |
| 25               | 1                | 0              | -1.989485               | 1.699880  | 2.711802  |
| 26               | 6                | 0              | 1.719348                | 0.660654  | 3.128632  |
| 27               | 1                | 0              | 1.131030                | 1.529088  | 3.460660  |
| 28               | 1                | 0              | 2.735736                | 0.765105  | 3.534790  |
| 29               | 8                | 0              | 1.744739                | 0.561341  | 1.728258  |
| 30               | 1                | 0              | 1.274437                | -0.231497 | 3.608082  |
| 31               | 1                | 0              | 2.997874                | 0.223060  | 1.339526  |
| 32               | 53               | 0              | 1.360540                | -1.292658 | -1.545762 |
| 33               | 19               | 0              | 1.399947                | 2.329426  | -0.140665 |
| 34               | 6                | 0              | 5.692685                | 0.061643  | -0.585397 |
| 35               | 1                | 0              | 6.133109                | 0.802152  | -1.250953 |
| 36               | 1                | 0              | 6.396481                | -0.228979 | 0.196132  |
| 37               | 1                | 0              | 5.436805                | -0.836146 | -1.155645 |
| 38               | 19               | 0              | -1.714737               | 0.219950  | -1.879188 |
| 39               | 6                | 0              | -1.420347               | 3.307333  | -0.472698 |
| 40               | 8                | 0              | -1.011518               | 2.513960  | -1.385021 |

|    |   |   |           |          |           |
|----|---|---|-----------|----------|-----------|
| 41 | 8 | 0 | -0.951093 | 3.374533 | 0.678936  |
| 42 | 6 | 0 | -2.569161 | 4.238303 | -0.859493 |
| 43 | 1 | 0 | -3.418599 | 3.648503 | -1.219431 |
| 44 | 1 | 0 | -2.875305 | 4.853605 | -0.013467 |
| 45 | 1 | 0 | -2.252095 | 4.878663 | -1.686746 |

-----

Zero-point correction= 0.338060 (Hartree/Particle)  
 Thermal correction to Energy= 0.370675  
 Thermal correction to Enthalpy= 0.371619  
 Thermal correction to Gibbs Free Energy= 0.266639  
 Sum of electronic and zero-point Energies= -2334.729138  
 Sum of electronic and thermal Energies= -2334.696523  
 Sum of electronic and thermal Enthalpies= -2334.695579  
 Sum of electronic and thermal Free Energies= -2334.800559

M06-2X/6-311++G(d,p)-LANL2DZ(SMD)//M06-2X/6-31G(d,p)-LANL2DZ energy in DMAc solvent = -2335.4794931

**73-TS (M06-2X/6-311++G(d,p)-LANL2DZ(SMD)//M06-2X/6-31G(d,p)-LANL2DZ)**

-----

| Center Number | Atomic Number | Atomic Type | Coordinates (Angstroms) |           |           |
|---------------|---------------|-------------|-------------------------|-----------|-----------|
|               |               |             | X                       | Y         | Z         |
| 1             | 6             | 0           | -3.023163               | -0.910325 | 0.887920  |
| 2             | 6             | 0           | -3.545988               | -1.816006 | -0.055709 |
| 3             | 6             | 0           | -4.344915               | -1.311971 | -1.087801 |
| 4             | 6             | 0           | -4.627888               | 0.050960  | -1.179202 |
| 5             | 6             | 0           | -4.114760               | 0.926819  | -0.223990 |
| 6             | 6             | 0           | -3.307840               | 0.465843  | 0.822814  |
| 7             | 1             | 0           | -4.776041               | -2.007016 | -1.804247 |
| 8             | 1             | 0           | -5.269096               | 0.422990  | -1.972304 |
| 9             | 1             | 0           | -4.352262               | 1.986152  | -0.275084 |
| 10            | 8             | 0           | -2.302382               | -1.374919 | 1.948336  |
| 11            | 6             | 0           | -0.972956               | -1.803174 | 1.673725  |
| 12            | 1             | 0           | -0.955083               | -2.460442 | 0.798270  |
| 13            | 46            | 0           | 0.432736                | -0.391069 | 1.308623  |
| 14            | 6             | 0           | -3.306624               | -3.298582 | 0.075978  |
| 15            | 1             | 0           | -4.162678               | -3.854479 | -0.313321 |
| 16            | 1             | 0           | -2.419165               | -3.620592 | -0.479618 |
| 17            | 1             | 0           | -3.156455               | -3.567587 | 1.123452  |
| 18            | 1             | 0           | -0.652454               | -2.358542 | 2.556335  |
| 19            | 6             | 0           | 4.531667                | -0.002454 | 0.054640  |
| 20            | 8             | 0           | 4.095381                | -0.273989 | 1.274227  |
| 21            | 8             | 0           | 4.192215                | 0.987108  | -0.572063 |
| 22            | 6             | 0           | -2.789317               | 1.413488  | 1.872320  |
| 23            | 1             | 0           | -2.534629               | 0.869269  | 2.782689  |
| 24            | 1             | 0           | -1.888298               | 1.932028  | 1.523660  |
| 25            | 1             | 0           | -3.545775               | 2.169385  | 2.101881  |
| 26            | 6             | 0           | 1.135332                | 1.544156  | 2.487385  |

|    |    |   |           |           |           |
|----|----|---|-----------|-----------|-----------|
| 27 | 1  | 0 | 0.338553  | 2.276761  | 2.325439  |
| 28 | 1  | 0 | 1.422916  | 1.300961  | 3.516885  |
| 29 | 8  | 0 | 1.954743  | 1.326730  | 1.543312  |
| 30 | 1  | 0 | -0.119461 | 0.221969  | 2.663464  |
| 31 | 1  | 0 | 3.385277  | 0.373182  | 1.507663  |
| 32 | 53 | 0 | 1.334521  | -1.513603 | -1.156966 |
| 33 | 19 | 0 | 1.850063  | 2.062606  | -0.991511 |
| 34 | 6  | 0 | 5.456496  | -1.055913 | -0.481577 |
| 35 | 1  | 0 | 6.013048  | -0.662103 | -1.329920 |
| 36 | 1  | 0 | 6.128352  | -1.412076 | 0.300042  |
| 37 | 1  | 0 | 4.835914  | -1.895718 | -0.809752 |
| 38 | 19 | 0 | -1.594033 | -0.017229 | -1.861065 |
| 39 | 6  | 0 | -0.952910 | 3.085643  | -0.687823 |
| 40 | 8  | 0 | -0.767949 | 2.322548  | -1.688085 |
| 41 | 8  | 0 | -0.191202 | 3.163082  | 0.302698  |
| 42 | 6  | 0 | -2.177932 | 3.997391  | -0.704967 |
| 43 | 1  | 0 | -2.837148 | 3.772129  | -1.544186 |
| 44 | 1  | 0 | -2.716983 | 3.907355  | 0.241908  |
| 45 | 1  | 0 | -1.840232 | 5.034651  | -0.781433 |

-----

Zero-point correction= 0.335595 (Hartree/Particle)

Thermal correction to Energy= 0.367242

Thermal correction to Enthalpy= 0.368186

Thermal correction to Gibbs Free Energy= 0.269290

Sum of electronic and zero-point Energies= -2334.703575

Sum of electronic and thermal Energies= -2334.671928

Sum of electronic and thermal Enthalpies= -2334.670984

Sum of electronic and thermal Free Energies= -2334.769881

M06-2X/6-311++G(d,p)-LANL2DZ(SMD)//M06-2X/6-31G(d,p)-LANL2DZ energy in DMAc solvent = -2335.4450284

**29 (M11/6-311++G(d,p)-LANL2DZ(SMD)//M11/6-31G(d,p)-LANL2DZ)**

-----

| Center<br>Number | Atomic<br>Number | Atomic<br>Type | Coordinates (Angstroms) |           |           |
|------------------|------------------|----------------|-------------------------|-----------|-----------|
|                  |                  |                | X                       | Y         | Z         |
| 1                | 6                | 0              | 2.404273                | 0.958704  | -1.421180 |
| 2                | 6                | 0              | 3.363847                | -0.063881 | -1.422885 |
| 3                | 6                | 0              | 4.552596                | 0.160517  | -0.722890 |
| 4                | 6                | 0              | 4.804075                | 1.382132  | -0.099826 |
| 5                | 6                | 0              | 3.868689                | 2.410731  | -0.195033 |
| 6                | 6                | 0              | 2.652792                | 2.223513  | -0.861385 |
| 7                | 1                | 0              | 5.298899                | -0.635840 | -0.692859 |
| 8                | 1                | 0              | 5.746694                | 1.545452  | 0.424869  |
| 9                | 1                | 0              | 4.081257                | 3.389921  | 0.239740  |
| 10               | 8                | 0              | 1.216790                | 0.718684  | -2.087289 |
| 11               | 6                | 0              | 0.034130                | 0.912548  | -1.391129 |
| 12               | 1                | 0              | -0.697516               | 1.375017  | -2.065824 |

|    |    |   |           |           |           |
|----|----|---|-----------|-----------|-----------|
| 13 | 46 | 0 | -0.715958 | -0.856784 | -0.916478 |
| 14 | 6  | 0 | 3.157543  | -1.321453 | -2.226063 |
| 15 | 1  | 0 | 3.679675  | -2.167986 | -1.764296 |
| 16 | 1  | 0 | 2.096866  | -1.575436 | -2.313090 |
| 17 | 1  | 0 | 3.559712  | -1.173459 | -3.239465 |
| 18 | 1  | 0 | 0.163058  | 1.400414  | -0.407864 |
| 19 | 53 | 0 | -3.265989 | 0.023090  | -1.107216 |
| 20 | 19 | 0 | 2.272902  | 0.585256  | 1.795804  |
| 21 | 53 | 0 | 1.047289  | -2.406707 | 0.524342  |
| 22 | 6  | 0 | -0.521165 | 1.361132  | 2.350057  |
| 23 | 8  | 0 | 0.093283  | 0.466839  | 3.039103  |
| 24 | 8  | 0 | -1.811428 | 1.430130  | 2.380907  |
| 25 | 19 | 0 | -1.823812 | -1.125379 | 2.412909  |
| 26 | 19 | 0 | -2.076425 | 2.963602  | 0.460367  |
| 27 | 8  | 0 | 0.153102  | 2.156441  | 1.551532  |
| 28 | 6  | 0 | 1.679057  | 3.371365  | -0.987792 |
| 29 | 1  | 0 | 1.083351  | 3.279151  | -1.905917 |
| 30 | 1  | 0 | 1.013622  | 3.392409  | -0.111329 |
| 31 | 1  | 0 | 2.229916  | 4.319420  | -1.031495 |

-----

Zero-point correction= 0.199601 (Hartree/Particle)

Thermal correction to Energy= 0.224591

Thermal correction to Enthalpy= 0.225536

Thermal correction to Gibbs Free Energy= 0.139806

Sum of electronic and zero-point Energies= -2637.289704

Sum of electronic and thermal Energies= -2637.264713

Sum of electronic and thermal Enthalpies= -2637.263769

Sum of electronic and thermal Free Energies= -2637.349498

M11/6-311++G(d,p)-LANL2DZ(SMD)//M11/6-31G(d,p)-LANL2DZ energy in DMAc solvent =-2637.8876218

### 33 (M11/6-311++G(d,p)-LANL2DZ(SMD)//M11/6-31G(d,p)-LANL2DZ)

-----

| Center<br>Number | Atomic<br>Number | Atomic<br>Type | Coordinates (Angstroms) |           |           |
|------------------|------------------|----------------|-------------------------|-----------|-----------|
|                  |                  |                | X                       | Y         | Z         |
| 1                | 6                | 0              | 3.083816                | -2.025198 | 0.116997  |
| 2                | 6                | 0              | 3.342604                | -3.378608 | 0.356503  |
| 3                | 6                | 0              | 4.604334                | -3.874361 | 0.029093  |
| 4                | 6                | 0              | 5.580956                | -3.042480 | -0.510714 |
| 5                | 6                | 0              | 5.300787                | -1.698540 | -0.733537 |
| 6                | 6                | 0              | 4.047438                | -1.168041 | -0.425340 |
| 7                | 1                | 0              | 4.820653                | -4.929443 | 0.208866  |
| 8                | 1                | 0              | 6.563771                | -3.443093 | -0.760578 |
| 9                | 1                | 0              | 6.062079                | -1.043147 | -1.161589 |
| 10               | 8                | 0              | 1.813823                | -1.561772 | 0.408894  |
| 11               | 6                | 0              | 1.724974                | -0.608444 | 1.480616  |
| 12               | 1                | 0              | 2.557150                | -0.770857 | 2.187318  |

|    |    |   |           |           |           |
|----|----|---|-----------|-----------|-----------|
| 13 | 46 | 0 | 1.798413  | 1.194038  | 0.681737  |
| 14 | 6  | 0 | 2.264946  | -4.246710 | 0.954073  |
| 15 | 1  | 0 | 2.647697  | -5.251181 | 1.170409  |
| 16 | 1  | 0 | 1.881730  | -3.807955 | 1.885435  |
| 17 | 1  | 0 | 1.408229  | -4.344942 | 0.272513  |
| 18 | 1  | 0 | 0.745786  | -0.733021 | 1.950290  |
| 19 | 6  | 0 | -0.644881 | 1.702256  | -2.035185 |
| 20 | 8  | 0 | 0.700841  | 1.531921  | -1.993017 |
| 21 | 8  | 0 | -1.129933 | 2.717361  | -1.451846 |
| 22 | 6  | 0 | 3.739447  | 0.284100  | -0.678868 |
| 23 | 1  | 0 | 2.792548  | 0.419240  | -1.234709 |
| 24 | 1  | 0 | 3.773384  | 0.863727  | 0.280858  |
| 25 | 1  | 0 | 4.516207  | 0.766886  | -1.283363 |
| 26 | 6  | 0 | 3.021014  | 3.558252  | -0.892996 |
| 27 | 1  | 0 | 3.860909  | 3.469014  | -0.172191 |
| 28 | 1  | 0 | 2.983860  | 4.620424  | -1.203460 |
| 29 | 8  | 0 | 1.803249  | 3.131830  | -0.355771 |
| 30 | 1  | 0 | 3.309054  | 2.980143  | -1.797790 |
| 31 | 1  | 0 | 1.101544  | 2.292146  | -1.420911 |
| 32 | 6  | 0 | -1.043426 | 1.286083  | 1.294111  |
| 33 | 8  | 0 | -1.088938 | 0.172523  | 0.660408  |
| 34 | 8  | 0 | 0.099385  | 1.782974  | 1.700828  |
| 35 | 19 | 0 | -0.323303 | -1.232948 | -1.333769 |
| 36 | 53 | 0 | -3.780044 | -2.228713 | -0.401089 |
| 37 | 19 | 0 | -0.423594 | 4.061326  | 0.592575  |
| 38 | 8  | 0 | -2.121472 | 1.927169  | 1.572229  |
| 39 | 8  | 0 | -1.309811 | 0.797066  | -2.601253 |
| 40 | 19 | 0 | -2.965923 | -0.506267 | 2.357299  |
| 41 | 19 | 0 | -3.217627 | 1.224503  | -0.893765 |

-----  
Zero-point correction= 0.270089 (Hartree/Particle)  
Thermal correction to Energy= 0.303033  
Thermal correction to Enthalpy= 0.303977  
Thermal correction to Gibbs Free Energy= 0.201155  
Sum of electronic and zero-point Energies= -3605.211227  
Sum of electronic and thermal Energies= -3605.178283  
Sum of electronic and thermal Enthalpies= -3605.177339  
Sum of electronic and thermal Free Energies= -3605.280161

M11/6-311++G(d,p)-LANL2DZ(SMD)//M11/6-31G(d,p)-LANL2DZ energy in DMAc solvent = -  
3606.0660532

### 34-TS (M11/6-311++G(d,p)-LANL2DZ(SMD)//M11/6-31G(d,p)-LANL2DZ)

-----

| Center<br>Number | Atomic<br>Number | Atomic<br>Type | Coordinates (Angstroms) |           |           |
|------------------|------------------|----------------|-------------------------|-----------|-----------|
|                  |                  |                | X                       | Y         | Z         |
| 1                | 6                | 0              | 3.452326                | -1.785710 | -0.037236 |
| 2                | 6                | 0              | 4.443982                | -2.343500 | 0.777052  |

-----

|    |    |   |           |           |           |
|----|----|---|-----------|-----------|-----------|
| 3  | 6  | 0 | 5.750536  | -2.381158 | 0.282596  |
| 4  | 6  | 0 | 6.054462  | -1.891129 | -0.982137 |
| 5  | 6  | 0 | 5.040202  | -1.377235 | -1.786124 |
| 6  | 6  | 0 | 3.723625  | -1.322636 | -1.330441 |
| 7  | 1  | 0 | 6.534977  | -2.819318 | 0.904085  |
| 8  | 1  | 0 | 7.080040  | -1.928078 | -1.351745 |
| 9  | 1  | 0 | 5.265171  | -1.014601 | -2.791503 |
| 10 | 8  | 0 | 2.144437  | -1.725850 | 0.409569  |
| 11 | 6  | 0 | 1.904237  | -0.752718 | 1.440511  |
| 12 | 1  | 0 | 2.712289  | -0.792536 | 2.181256  |
| 13 | 46 | 0 | 1.644368  | 1.116902  | 0.750790  |
| 14 | 6  | 0 | 4.114641  | -2.935142 | 2.126974  |
| 15 | 1  | 0 | 4.724669  | -3.830039 | 2.306471  |
| 16 | 1  | 0 | 4.320147  | -2.228083 | 2.944293  |
| 17 | 1  | 0 | 3.055438  | -3.215695 | 2.181583  |
| 18 | 1  | 0 | 0.937717  | -1.004935 | 1.900038  |
| 19 | 6  | 0 | -0.211514 | 1.876214  | -2.050134 |
| 20 | 8  | 0 | 1.142360  | 2.055214  | -2.114969 |
| 21 | 8  | 0 | -0.892401 | 2.873083  | -1.660589 |
| 22 | 6  | 0 | 2.600887  | -0.827969 | -2.203447 |
| 23 | 1  | 0 | 1.952239  | -1.665321 | -2.509694 |
| 24 | 1  | 0 | 1.984318  | -0.069854 | -1.702215 |
| 25 | 1  | 0 | 2.984801  | -0.367299 | -3.121625 |
| 26 | 6  | 0 | 3.086249  | 2.833554  | 0.317585  |
| 27 | 1  | 0 | 3.717946  | 3.140323  | 1.167374  |
| 28 | 1  | 0 | 3.634999  | 2.619415  | -0.616592 |
| 29 | 8  | 0 | 1.883909  | 3.298248  | 0.234544  |
| 30 | 1  | 0 | 3.243698  | 1.271727  | 0.790105  |
| 31 | 1  | 0 | 1.337116  | 2.867532  | -1.616492 |
| 32 | 6  | 0 | -1.406689 | 0.551926  | 1.411857  |
| 33 | 8  | 0 | -1.291893 | -0.591335 | 1.948230  |
| 34 | 8  | 0 | -0.471256 | 0.991981  | 0.594106  |
| 35 | 19 | 0 | -0.349479 | -1.363581 | -0.689835 |
| 36 | 53 | 0 | -3.926927 | -1.932377 | -0.721435 |
| 37 | 19 | 0 | -0.727179 | 3.535407  | 0.826721  |
| 38 | 8  | 0 | -2.447116 | 1.309643  | 1.550801  |
| 39 | 8  | 0 | -0.637770 | 0.741926  | -2.360057 |
| 40 | 19 | 0 | -3.761227 | -0.810940 | 2.461076  |
| 41 | 19 | 0 | -2.938916 | 1.301485  | -1.207488 |

---

|                                              |                             |
|----------------------------------------------|-----------------------------|
| Zero-point correction=                       | 0.266771 (Hartree/Particle) |
| Thermal correction to Energy=                | 0.299505                    |
| Thermal correction to Enthalpy=              | 0.300449                    |
| Thermal correction to Gibbs Free Energy=     | 0.198048                    |
| Sum of electronic and zero-point Energies=   | -3605.192799                |
| Sum of electronic and thermal Energies=      | -3605.160065                |
| Sum of electronic and thermal Enthalpies=    | -3605.159121                |
| Sum of electronic and thermal Free Energies= | -3605.261522                |

M11/6-311++G(d,p)-LANL2DZ(SMD)//M11/6-31G(d,p)-LANL2DZ energy in DMAc solvent = -  
3606.0451266

**39 (M11/6-311++G(d,p)-LANL2DZ(SMD)//M11/6-31G(d,p)-LANL2DZ)**

| Center<br>Number | Atomic<br>Number | Atomic<br>Type | Coordinates (Angstroms) |           |           |
|------------------|------------------|----------------|-------------------------|-----------|-----------|
|                  |                  |                | X                       | Y         | Z         |
| 1                | 46               | 0              | 0.875832                | 1.156696  | 0.963202  |
| 2                | 6                | 0              | 4.227548                | -0.829742 | -0.041503 |
| 3                | 6                | 0              | 5.189693                | 0.077247  | 0.414762  |
| 4                | 6                | 0              | 6.513835                | -0.365154 | 0.473403  |
| 5                | 6                | 0              | 6.860348                | -1.658061 | 0.093810  |
| 6                | 6                | 0              | 5.879370                | -2.536882 | -0.358194 |
| 7                | 6                | 0              | 4.546561                | -2.134756 | -0.430330 |
| 8                | 1                | 0              | 7.283687                | 0.328352  | 0.819183  |
| 9                | 1                | 0              | 7.900773                | -1.981615 | 0.146037  |
| 10               | 1                | 0              | 6.145994                | -3.552931 | -0.657705 |
| 11               | 8                | 0              | 2.908446                | -0.428075 | -0.159858 |
| 12               | 6                | 0              | 2.172134                | -0.332190 | 1.076065  |
| 13               | 1                | 0              | 1.630525                | -1.276796 | 1.251242  |
| 14               | 1                | 0              | 2.875740                | -0.139204 | 1.902266  |
| 15               | 6                | 0              | 4.801257                | 1.478559  | 0.818299  |
| 16               | 1                | 0              | 5.638847                | 2.169166  | 0.656296  |
| 17               | 1                | 0              | 4.545982                | 1.522156  | 1.888563  |
| 18               | 6                | 0              | 3.455799                | -3.051338 | -0.926219 |
| 19               | 1                | 0              | 2.600669                | -3.062455 | -0.237162 |
| 20               | 1                | 0              | 3.075380                | -2.719982 | -1.904814 |
| 21               | 1                | 0              | 3.829371                | -4.076544 | -1.041164 |
| 22               | 1                | 0              | 3.925425                | 1.838880  | 0.262050  |
| 23               | 6                | 0              | 0.598600                | 2.901798  | -0.679738 |
| 24               | 8                | 0              | -0.198824               | 3.024343  | 0.345153  |
| 25               | 8                | 0              | 1.831910                | 2.504721  | -0.391406 |
| 26               | 8                | 0              | 0.184307                | 2.944805  | -1.875734 |
| 27               | 19               | 0              | 1.440702                | 0.582932  | -2.113160 |
| 28               | 6                | 0              | -0.919649               | -1.001580 | 0.325998  |
| 29               | 8                | 0              | -0.693800               | -0.208494 | 1.355560  |
| 30               | 8                | 0              | -1.415571               | -2.154708 | 0.562455  |
| 31               | 19               | 0              | -2.092651               | 1.836679  | -0.812322 |
| 32               | 53               | 0              | -4.767298               | -0.326086 | -0.090687 |
| 33               | 19               | 0              | -2.724986               | -1.192626 | 2.580037  |
| 34               | 8                | 0              | -0.717801               | -0.581645 | -0.882951 |
| 35               | 19               | 0              | -2.529181               | -2.335903 | -1.697162 |

Zero-point correction= 0.216699 (Hartree/Particle)  
 Thermal correction to Energy= 0.245148  
 Thermal correction to Enthalpy= 0.246092  
 Thermal correction to Gibbs Free Energy= 0.153590

Sum of electronic and zero-point Energies= -3489.559220  
 Sum of electronic and thermal Energies= -3489.530771  
 Sum of electronic and thermal Enthalpies= -3489.529827  
 Sum of electronic and thermal Free Energies= -3489.622329

M11/6-311++G(d,p)-LANL2DZ(SMD)//M11/6-31G(d,p)-LANL2DZ energy in DMAc solvent = -  
 3490.3279961

**40-TS (M11/6-311++G(d,p)-LANL2DZ(SMD)//M11/6-31G(d,p)-LANL2DZ)**

| Center<br>Number | Atomic<br>Number | Atomic<br>Type | Coordinates (Angstroms) |           |           |
|------------------|------------------|----------------|-------------------------|-----------|-----------|
|                  |                  |                | X                       | Y         | Z         |
| 1                | 46               | 0              | -1.118150               | -0.861840 | 1.023710  |
| 2                | 6                | 0              | -3.904500               | 0.922708  | 0.314455  |
| 3                | 6                | 0              | -4.316199               | -0.364112 | 0.700140  |
| 4                | 6                | 0              | -5.666938               | -0.679964 | 0.496232  |
| 5                | 6                | 0              | -6.561391               | 0.223058  | -0.059384 |
| 6                | 6                | 0              | -6.116427               | 1.486836  | -0.442331 |
| 7                | 6                | 0              | -4.786626               | 1.850845  | -0.262067 |
| 8                | 1                | 0              | -6.006768               | -1.678890 | 0.776765  |
| 9                | 1                | 0              | -7.605662               | -0.058087 | -0.199737 |
| 10               | 1                | 0              | -6.809722               | 2.208418  | -0.879884 |
| 11               | 8                | 0              | -2.600154               | 1.361896  | 0.410540  |
| 12               | 6                | 0              | -1.815041               | 0.924573  | 1.510624  |
| 13               | 1                | 0              | -0.976462               | 1.626789  | 1.600973  |
| 14               | 1                | 0              | -2.428260               | 0.914206  | 2.426115  |
| 15               | 6                | 0              | -3.366719               | -1.426045 | 1.180749  |
| 16               | 1                | 0              | -3.872793               | -2.399738 | 1.219803  |
| 17               | 1                | 0              | -3.011588               | -1.266512 | 2.212147  |
| 18               | 6                | 0              | -4.272113               | 3.212743  | -0.656785 |
| 19               | 1                | 0              | -3.794720               | 3.713877  | 0.195745  |
| 20               | 1                | 0              | -3.506558               | 3.143988  | -1.445055 |
| 21               | 1                | 0              | -5.088525               | 3.843544  | -1.029373 |
| 22               | 1                | 0              | -2.717882               | -1.751140 | 0.128305  |
| 23               | 6                | 0              | -1.080733               | -2.353765 | -1.240803 |
| 24               | 8                | 0              | -0.523178               | -2.704392 | -0.108366 |
| 25               | 8                | 0              | -2.350514               | -2.037113 | -1.230720 |
| 26               | 8                | 0              | -0.392565               | -2.180582 | -2.295175 |
| 27               | 19               | 0              | -1.567828               | 0.258912  | -2.107563 |
| 28               | 6                | 0              | 1.050727                | 0.952782  | 0.241407  |
| 29               | 8                | 0              | 0.848744                | -0.071346 | 1.058074  |
| 30               | 8                | 0              | 1.594906                | 2.005016  | 0.717306  |
| 31               | 19               | 0              | 1.770164                | -1.832478 | -0.894534 |
| 32               | 53               | 0              | 4.774097                | -0.053408 | -0.124755 |
| 33               | 19               | 0              | 2.787263                | 0.668096  | 2.584067  |
| 34               | 8                | 0              | 0.768408                | 0.830269  | -1.006800 |
| 35               | 19               | 0              | 2.824994                | 2.381829  | -1.504957 |



Zero-point correction= 0.213129 (Hartree/Particle)  
 Thermal correction to Energy= 0.241174  
 Thermal correction to Enthalpy= 0.242118  
 Thermal correction to Gibbs Free Energy= 0.150281  
 Sum of electronic and zero-point Energies= -3489.541885  
 Sum of electronic and thermal Energies= -3489.513840  
 Sum of electronic and thermal Enthalpies= -3489.512896  
 Sum of electronic and thermal Free Energies= -3489.604733

M11/6-311++G(d,p)-LANL2DZ(SMD)//M11/6-31G(d,p)-LANL2DZ energy in DMAc solvent = -  
 3490.3080797

**66 (M11/6-311++G(d,p)-LANL2DZ(SMD)//M11/6-31G(d,p)-LANL2DZ)**

| Center<br>Number | Atomic<br>Number | Atomic<br>Type | Coordinates (Angstroms) |           |           |
|------------------|------------------|----------------|-------------------------|-----------|-----------|
|                  |                  |                | X                       | Y         | Z         |
| 1                | 6                | 0              | -3.567405               | 0.198718  | 0.333752  |
| 2                | 6                | 0              | -3.430546               | -0.637497 | 1.458099  |
| 3                | 6                | 0              | -3.461253               | -2.014969 | 1.251961  |
| 4                | 6                | 0              | -3.614320               | -2.538952 | -0.029298 |
| 5                | 6                | 0              | -3.741927               | -1.696329 | -1.127559 |
| 6                | 6                | 0              | -3.720041               | -0.309109 | -0.971205 |
| 7                | 1                | 0              | -3.350741               | -2.682527 | 2.108126  |
| 8                | 1                | 0              | -3.616205               | -3.619472 | -0.173751 |
| 9                | 1                | 0              | -3.855255               | -2.113767 | -2.129418 |
| 10               | 8                | 0              | -3.643676               | 1.580118  | 0.545369  |
| 11               | 6                | 0              | -2.372700               | 2.162925  | 0.304528  |
| 12               | 1                | 0              | -2.038857               | 2.735174  | 1.179826  |
| 13               | 46               | 0              | -1.218941               | 0.569305  | 0.011126  |
| 14               | 6                | 0              | -3.314051               | -0.018235 | 2.828371  |
| 15               | 1                | 0              | -3.150398               | -0.789819 | 3.589899  |
| 16               | 1                | 0              | -2.482650               | 0.699059  | 2.872183  |
| 17               | 1                | 0              | -4.229424               | 0.536407  | 3.076635  |
| 18               | 1                | 0              | -2.376373               | 2.773434  | -0.610977 |
| 19               | 53               | 0              | 0.874319                | 2.235041  | -0.128306 |
| 20               | 19               | 0              | 2.521650                | -0.178387 | -2.108851 |
| 21               | 53               | 0              | 0.115928                | -1.938838 | -0.386902 |
| 22               | 6                | 0              | 5.090597                | -0.571207 | 0.542900  |
| 23               | 8                | 0              | 4.118350                | -0.406181 | -0.271838 |
| 24               | 8                | 0              | 4.965730                | -0.660435 | 1.782233  |
| 25               | 6                | 0              | 6.485699                | -0.673683 | -0.068991 |
| 26               | 1                | 0              | 7.246617                | -0.727892 | 0.715022  |
| 27               | 1                | 0              | 6.539262                | -1.573227 | -0.697108 |
| 28               | 1                | 0              | 6.670331                | 0.193510  | -0.716068 |
| 29               | 19               | 0              | 2.416642                | -0.417381 | 1.797271  |
| 30               | 6                | 0              | -3.901307               | 0.638676  | -2.132102 |
| 31               | 1                | 0              | -4.496458               | 1.507980  | -1.824119 |
| 32               | 1                | 0              | -2.933200               | 1.009792  | -2.499905 |

33            1            0            -4.405689      0.134123      -2.964915

-----  
 Zero-point correction=            0.230962 (Hartree/Particle)  
 Thermal correction to Energy=            0.257276  
 Thermal correction to Enthalpy=            0.258220  
 Thermal correction to Gibbs Free Energy=            0.166407  
 Sum of electronic and zero-point Energies=            -2001.978985  
 Sum of electronic and thermal Energies=            -2001.952671  
 Sum of electronic and thermal Enthalpies=            -2001.951727  
 Sum of electronic and thermal Free Energies=            -2002.043540

M11/6-311++G(d,p)-LANL2DZ(SMD)//M11/6-31G(d,p)-LANL2DZ energy in DMAc solvent = -2002.5307387

**68 (M11/6-311++G(d,p)-LANL2DZ(SMD)//M11/6-31G(d,p)-LANL2DZ)**

-----

| Center<br>Number | Atomic<br>Number | Atomic<br>Type | Coordinates (Angstroms) |           |           |
|------------------|------------------|----------------|-------------------------|-----------|-----------|
|                  |                  |                | X                       | Y         | Z         |
| 1                | 46               | 0              | 0.351755                | 0.577577  | 0.447296  |
| 2                | 6                | 0              | -3.329388               | -0.329401 | -0.147047 |
| 3                | 6                | 0              | -3.646224               | -0.071139 | 1.188829  |
| 4                | 6                | 0              | -5.000176               | -0.038857 | 1.531297  |
| 5                | 6                | 0              | -5.990467               | -0.260291 | 0.579775  |
| 6                | 6                | 0              | -5.639881               | -0.519855 | -0.741834 |
| 7                | 6                | 0              | -4.300227               | -0.554183 | -1.126527 |
| 8                | 1                | 0              | -5.273352               | 0.157637  | 2.570127  |
| 9                | 1                | 0              | -7.041346               | -0.233391 | 0.870183  |
| 10               | 1                | 0              | -6.413092               | -0.692456 | -1.493356 |
| 11               | 8                | 0              | -2.000153               | -0.399567 | -0.550042 |
| 12               | 6                | 0              | -1.290475               | 0.833112  | -0.614520 |
| 13               | 1                | 0              | -1.001883               | 1.037033  | -1.656290 |
| 14               | 1                | 0              | -1.893317               | 1.657353  | -0.208387 |
| 15               | 6                | 0              | -2.561525               | 0.142094  | 2.214048  |
| 16               | 1                | 0              | -2.974949               | 0.069357  | 3.227649  |
| 17               | 1                | 0              | -2.100635               | 1.137421  | 2.114313  |
| 18               | 6                | 0              | -3.882063               | -0.824718 | -2.550099 |
| 19               | 1                | 0              | -3.195287               | -0.049188 | -2.916344 |
| 20               | 1                | 0              | -3.361682               | -1.791046 | -2.636579 |
| 21               | 1                | 0              | -4.754080               | -0.856297 | -3.214230 |
| 22               | 1                | 0              | -1.760814               | -0.601435 | 2.099038  |
| 23               | 6                | 0              | 1.372337                | -1.486540 | 1.725578  |
| 24               | 8                | 0              | 2.121459                | -0.475213 | 1.598384  |
| 25               | 8                | 0              | 0.195338                | -1.492656 | 1.231137  |
| 26               | 6                | 0              | 1.854588                | -2.724227 | 2.442660  |
| 27               | 1                | 0              | 1.088816                | -3.054484 | 3.154209  |
| 28               | 1                | 0              | 1.988202                | -3.517575 | 1.692568  |
| 29               | 1                | 0              | 2.797592                | -2.526490 | 2.962002  |
| 30               | 19               | 0              | 3.487427                | 0.417554  | -0.422121 |

|    |    |   |           |           |           |
|----|----|---|-----------|-----------|-----------|
| 31 | 53 | 0 | 1.151326  | 2.998919  | -0.319617 |
| 32 | 6  | 0 | 2.646379  | -2.752233 | -0.875964 |
| 33 | 8  | 0 | 1.893806  | -3.739773 | -0.729086 |
| 34 | 8  | 0 | 2.305539  | -1.634183 | -1.385673 |
| 35 | 6  | 0 | 4.081762  | -2.855162 | -0.340737 |
| 36 | 1  | 0 | 4.144777  | -2.286069 | 0.601850  |
| 37 | 1  | 0 | 4.342709  | -3.896537 | -0.128322 |
| 38 | 1  | 0 | 4.797485  | -2.433466 | -1.060475 |
| 39 | 19 | 0 | -0.256158 | -2.367661 | -1.190742 |

-----

Zero-point correction= 0.283754 (Hartree/Particle)  
Thermal correction to Energy= 0.311764  
Thermal correction to Enthalpy= 0.312708  
Thermal correction to Gibbs Free Energy= 0.221224  
Sum of electronic and zero-point Energies= -2218.962891  
Sum of electronic and thermal Energies= -2218.934881  
Sum of electronic and thermal Enthalpies= -2218.933937  
Sum of electronic and thermal Free Energies= -2219.025420

M11/6-311++G(d,p)-LANL2DZ(SMD)//M11/6-31G(d,p)-LANL2DZ energy in DMAc solvent = -  
2219.6384682

**69-TS (M11/6-311++G(d,p)-LANL2DZ(SMD)//M11/6-31G(d,p)-LANL2DZ)**

-----

| Center<br>Number | Atomic<br>Number | Atomic<br>Type | Coordinates (Angstroms) |           |           |
|------------------|------------------|----------------|-------------------------|-----------|-----------|
|                  |                  |                | X                       | Y         | Z         |
| 1                | 46               | 0              | 0.031375                | -1.218899 | 0.799769  |
| 2                | 6                | 0              | 3.086397                | -0.371371 | -0.355958 |
| 3                | 6                | 0              | 3.050516                | -0.155048 | 1.032048  |
| 4                | 6                | 0              | 4.053368                | 0.670893  | 1.565687  |
| 5                | 6                | 0              | 5.036569                | 1.242821  | 0.773471  |
| 6                | 6                | 0              | 5.039160                | 1.008098  | -0.601617 |
| 7                | 6                | 0              | 4.065964                | 0.205037  | -1.183877 |
| 8                | 1                | 0              | 4.040610                | 0.863082  | 2.640512  |
| 9                | 1                | 0              | 5.803279                | 1.873807  | 1.223893  |
| 10               | 1                | 0              | 5.809784                | 1.450216  | -1.236365 |
| 11               | 8                | 0              | 2.127784                | -1.089090 | -1.030981 |
| 12               | 6                | 0              | 1.409570                | -2.097497 | -0.356146 |
| 13               | 1                | 0              | 0.929442                | -2.708354 | -1.123359 |
| 14               | 1                | 0              | 2.085434                | -2.701546 | 0.265948  |
| 15               | 6                | 0              | 1.937195                | -0.641160 | 1.913341  |
| 16               | 1                | 0              | 2.037376                | -0.183044 | 2.908101  |
| 17               | 1                | 0              | 1.950518                | -1.719756 | 2.110097  |
| 18               | 6                | 0              | 4.036685                | -0.072374 | -2.666186 |
| 19               | 1                | 0              | 4.053019                | -1.152788 | -2.861593 |
| 20               | 1                | 0              | 3.119267                | 0.314238  | -3.134859 |
| 21               | 1                | 0              | 4.895723                | 0.392768  | -3.164306 |
| 22               | 1                | 0              | 0.971934                | 0.364459  | 1.694708  |

|    |    |   |           |           |           |
|----|----|---|-----------|-----------|-----------|
| 23 | 6  | 0 | -0.790987 | 1.343935  | 2.095055  |
| 24 | 8  | 0 | -1.367005 | 0.231930  | 1.989608  |
| 25 | 8  | 0 | 0.435022  | 1.517292  | 1.761755  |
| 26 | 6  | 0 | -1.547213 | 2.553256  | 2.586695  |
| 27 | 1  | 0 | -0.880120 | 3.223299  | 3.137692  |
| 28 | 1  | 0 | -1.909561 | 3.074490  | 1.688989  |
| 29 | 1  | 0 | -2.392313 | 2.248676  | 3.214429  |
| 30 | 19 | 0 | -3.493140 | 0.517366  | 0.448444  |
| 31 | 53 | 0 | -1.943859 | -2.175056 | -0.794924 |
| 32 | 6  | 0 | -1.752544 | 3.230924  | -1.321715 |
| 33 | 8  | 0 | -0.699556 | 3.405136  | -1.962280 |
| 34 | 8  | 0 | -1.982887 | 2.229674  | -0.552574 |
| 35 | 6  | 0 | -2.869519 | 4.268885  | -1.437695 |
| 36 | 1  | 0 | -3.139167 | 4.637986  | -0.438616 |
| 37 | 1  | 0 | -2.554765 | 5.103981  | -2.070077 |
| 38 | 1  | 0 | -3.763386 | 3.799098  | -1.870760 |
| 39 | 19 | 0 | 0.539791  | 1.324148  | -1.056113 |

-----

Zero-point correction= 0.279376 (Hartree/Particle)  
Thermal correction to Energy= 0.306689  
Thermal correction to Enthalpy= 0.307633  
Thermal correction to Gibbs Free Energy= 0.216838  
Sum of electronic and zero-point Energies= -2218.923536  
Sum of electronic and thermal Energies= -2218.896223  
Sum of electronic and thermal Enthalpies= -2218.895279  
Sum of electronic and thermal Free Energies= -2218.986075

M11/6-311++G(d,p)-LANL2DZ(SMD)//M11/6-31G(d,p)-LANL2DZ energy in DMAc solvent = -2219.5952156

**72 (M11/6-311++G(d,p)-LANL2DZ(SMD)//M11/6-31G(d,p)-LANL2DZ)**

-----

| Center<br>Number | Atomic<br>Number | Atomic<br>Type | Coordinates (Angstroms) |           |           |
|------------------|------------------|----------------|-------------------------|-----------|-----------|
|                  |                  |                | X                       | Y         | Z         |
| 1                | 6                | 0              | -2.810451               | -1.056919 | 0.921925  |
| 2                | 6                | 0              | -3.810063               | -1.506713 | 0.043200  |
| 3                | 6                | 0              | -4.646597               | -0.549304 | -0.538588 |
| 4                | 6                | 0              | -4.499797               | 0.807676  | -0.241692 |
| 5                | 6                | 0              | -3.526236               | 1.219027  | 0.665019  |
| 6                | 6                | 0              | -2.665258               | 0.293984  | 1.266943  |
| 7                | 1                | 0              | -5.441252               | -0.881046 | -1.210916 |
| 8                | 1                | 0              | -5.166210               | 1.542066  | -0.696947 |
| 9                | 1                | 0              | -3.406019               | 2.274599  | 0.918898  |
| 10               | 8                | 0              | -1.940715               | -1.985738 | 1.468209  |
| 11               | 6                | 0              | -0.932212               | -2.424702 | 0.567182  |
| 12               | 1                | 0              | -1.316821               | -2.520247 | -0.459198 |
| 13               | 46               | 0              | 0.402671                | -1.026162 | 0.930027  |
| 14               | 6                | 0              | -3.991636               | -2.981637 | -0.228828 |

|    |    |   |           |           |           |
|----|----|---|-----------|-----------|-----------|
| 15 | 1  | 0 | -5.043416 | -3.200482 | -0.449916 |
| 16 | 1  | 0 | -3.394835 | -3.323842 | -1.087626 |
| 17 | 1  | 0 | -3.681913 | -3.572497 | 0.641623  |
| 18 | 1  | 0 | -0.536246 | -3.384559 | 0.926678  |
| 19 | 6  | 0 | 4.475062  | 0.539607  | 0.118886  |
| 20 | 8  | 0 | 3.980218  | -0.173427 | 1.091078  |
| 21 | 8  | 0 | 3.939076  | 1.548756  | -0.341738 |
| 22 | 6  | 0 | -1.609043 | 0.755152  | 2.236556  |
| 23 | 1  | 0 | -1.263659 | -0.065973 | 2.880337  |
| 24 | 1  | 0 | -0.754671 | 1.205570  | 1.704233  |
| 25 | 1  | 0 | -2.006075 | 1.549739  | 2.880951  |
| 26 | 6  | 0 | 1.660748  | 0.617721  | 3.114760  |
| 27 | 1  | 0 | 1.035140  | 1.466132  | 3.449490  |
| 28 | 1  | 0 | 2.674094  | 0.761669  | 3.531208  |
| 29 | 8  | 0 | 1.702726  | 0.525101  | 1.711714  |
| 30 | 1  | 0 | 1.247954  | -0.297960 | 3.590106  |
| 31 | 1  | 0 | 2.986209  | 0.157918  | 1.354213  |
| 32 | 53 | 0 | 1.446039  | -1.305846 | -1.481955 |
| 33 | 19 | 0 | 1.459571  | 2.324993  | -0.174213 |
| 34 | 6  | 0 | 5.769563  | -0.004997 | -0.441100 |
| 35 | 1  | 0 | 6.278088  | 0.762287  | -1.031735 |
| 36 | 1  | 0 | 6.410831  | -0.371624 | 0.367926  |
| 37 | 1  | 0 | 5.521665  | -0.857956 | -1.088098 |
| 38 | 19 | 0 | -1.730016 | 0.114708  | -1.820243 |
| 39 | 6  | 0 | -1.354019 | 3.295655  | -0.541729 |
| 40 | 8  | 0 | -0.972765 | 2.405922  | -1.377288 |
| 41 | 8  | 0 | -0.858646 | 3.467133  | 0.590370  |
| 42 | 6  | 0 | -2.499285 | 4.204296  | -0.996805 |
| 43 | 1  | 0 | -3.358711 | 3.592472  | -1.307266 |
| 44 | 1  | 0 | -2.794453 | 4.888607  | -0.194896 |
| 45 | 1  | 0 | -2.177940 | 4.779047  | -1.875190 |

-----

Zero-point correction= 0.334964 (Hartree/Particle)

Thermal correction to Energy= 0.367465

Thermal correction to Enthalpy= 0.368409

Thermal correction to Gibbs Free Energy= 0.265810

Sum of electronic and zero-point Energies= -2334.574411

Sum of electronic and thermal Energies= -2334.541910

Sum of electronic and thermal Enthalpies= -2334.540966

Sum of electronic and thermal Free Energies= -2334.643565

M11/6-311++G(d,p)-LANL2DZ(SMD)//M11/6-31G(d,p)-LANL2DZ energy in DMAc solvent = -2335.3466842

### 73-TS (M11/6-311++G(d,p)-LANL2DZ(SMD)//M11/6-31G(d,p)-LANL2DZ)

-----

| Center | Atomic | Atomic | Coordinates (Angstroms) |   |   |
|--------|--------|--------|-------------------------|---|---|
| Number | Number | Type   | X                       | Y | Z |

-----

|    |    |   |           |           |           |
|----|----|---|-----------|-----------|-----------|
| 1  | 6  | 0 | -3.231565 | -1.007135 | 0.416474  |
| 2  | 6  | 0 | -3.481274 | -1.124787 | -0.962190 |
| 3  | 6  | 0 | -4.130350 | -0.062042 | -1.605455 |
| 4  | 6  | 0 | -4.535080 | 1.074616  | -0.907666 |
| 5  | 6  | 0 | -4.295736 | 1.160163  | 0.465368  |
| 6  | 6  | 0 | -3.644546 | 0.126208  | 1.142102  |
| 7  | 1  | 0 | -4.348999 | -0.154067 | -2.671847 |
| 8  | 1  | 0 | -5.060238 | 1.878467  | -1.425635 |
| 9  | 1  | 0 | -4.631572 | 2.033734  | 1.028591  |
| 10 | 8  | 0 | -2.676874 | -2.020865 | 1.141690  |
| 11 | 6  | 0 | -1.339204 | -2.420880 | 0.851771  |
| 12 | 1  | 0 | -1.247697 | -2.787968 | -0.176844 |
| 13 | 46 | 0 | 0.115546  | -1.024324 | 1.039860  |
| 14 | 6  | 0 | -3.145218 | -2.384858 | -1.720492 |
| 15 | 1  | 0 | -3.807162 | -2.490096 | -2.589047 |
| 16 | 1  | 0 | -2.107080 | -2.373361 | -2.085027 |
| 17 | 1  | 0 | -3.272393 | -3.263286 | -1.074474 |
| 18 | 1  | 0 | -1.121543 | -3.234324 | 1.551864  |
| 19 | 6  | 0 | 4.106821  | -1.329927 | 0.328157  |
| 20 | 8  | 0 | 3.333510  | -1.679884 | 1.351969  |
| 21 | 8  | 0 | 4.259226  | -0.166024 | -0.003054 |
| 22 | 6  | 0 | -3.429642 | 0.161133  | 2.632977  |
| 23 | 1  | 0 | -4.049120 | -0.603238 | 3.122007  |
| 24 | 1  | 0 | -2.387379 | -0.074590 | 2.880770  |
| 25 | 1  | 0 | -3.692427 | 1.142923  | 3.046006  |
| 26 | 6  | 0 | 0.884775  | 0.226090  | 2.826142  |
| 27 | 1  | 0 | 0.121760  | 0.992595  | 3.039493  |
| 28 | 1  | 0 | 1.184765  | -0.413895 | 3.671767  |
| 29 | 8  | 0 | 1.689555  | 0.403495  | 1.852742  |
| 30 | 1  | 0 | -0.429271 | -1.021194 | 2.525262  |
| 31 | 1  | 0 | 2.852400  | -0.870559 | 1.657921  |
| 32 | 53 | 0 | 0.853577  | -1.052133 | -1.632438 |
| 33 | 19 | 0 | 2.592059  | 1.859814  | -0.269793 |
| 34 | 6  | 0 | 4.720944  | -2.503633 | -0.380421 |
| 35 | 1  | 0 | 5.556103  | -2.166834 | -0.999990 |
| 36 | 1  | 0 | 5.040426  | -3.264388 | 0.339862  |
| 37 | 1  | 0 | 3.942913  | -2.941221 | -1.021981 |
| 38 | 19 | 0 | -1.450308 | 1.408751  | -0.827974 |
| 39 | 6  | 0 | 0.808792  | 4.270061  | -0.149569 |
| 40 | 8  | 0 | 0.202721  | 3.160953  | -0.357118 |
| 41 | 8  | 0 | 2.039116  | 4.389813  | 0.004187  |
| 42 | 6  | 0 | -0.068982 | 5.521379  | -0.094669 |
| 43 | 1  | 0 | -0.819337 | 5.409306  | 0.699467  |
| 44 | 1  | 0 | 0.539759  | 6.411030  | 0.091624  |
| 45 | 1  | 0 | -0.608329 | 5.631993  | -1.045017 |

-----  
Zero-point correction=

0.332068 (Hartree/Particle)

Thermal correction to Energy=

0.364537

Thermal correction to Enthalpy= 0.365481  
 Thermal correction to Gibbs Free Energy= 0.261128  
 Sum of electronic and zero-point Energies= -2334.548959  
 Sum of electronic and thermal Energies= -2334.516490  
 Sum of electronic and thermal Enthalpies= -2334.515546  
 Sum of electronic and thermal Free Energies= -2334.619899

M11/6-311++G(d,p)-LANL2DZ(SMD)//M11/6-31G(d,p)-LANL2DZ energy in DMAc solvent = -2335.3158192

**29 (M06-D3/6-311++G(d,p)-LANL2DZ(SMD)//B3LYP-D3/6-31G(d,p)-LANL2DZ(SMD))**

| Center Number | Atomic Number | Atomic Type | Coordinates (Angstroms) |           |           |
|---------------|---------------|-------------|-------------------------|-----------|-----------|
|               |               |             | X                       | Y         | Z         |
| 1             | 6             | 0           | 2.474226                | 0.354813  | -1.734774 |
| 2             | 6             | 0           | 3.364168                | -0.707007 | -1.500892 |
| 3             | 6             | 0           | 4.600095                | -0.401759 | -0.917944 |
| 4             | 6             | 0           | 4.952256                | 0.918249  | -0.626687 |
| 5             | 6             | 0           | 4.081432                | 1.960261  | -0.954804 |
| 6             | 6             | 0           | 2.823751                | 1.703062  | -1.527426 |
| 7             | 1             | 0           | 5.293092                | -1.210060 | -0.700956 |
| 8             | 1             | 0           | 5.915114                | 1.138496  | -0.174520 |
| 9             | 1             | 0           | 4.378291                | 2.992677  | -0.785830 |
| 10            | 8             | 0           | 1.237622                | 0.034182  | -2.288022 |
| 11            | 6             | 0           | 0.094597                | 0.377358  | -1.588430 |
| 12            | 1             | 0           | -0.685514               | 0.591696  | -2.319536 |
| 13            | 46            | 0           | -0.667435               | -1.165979 | -0.525572 |
| 14            | 6             | 0           | 3.019648                | -2.111071 | -1.923313 |
| 15            | 1             | 0           | 3.666683                | -2.838174 | -1.426012 |
| 16            | 1             | 0           | 1.980210                | -2.360320 | -1.703176 |
| 17            | 1             | 0           | 3.159421                | -2.221988 | -3.006474 |
| 18            | 1             | 0           | 0.235941                | 1.135985  | -0.810383 |
| 19            | 53            | 0           | -3.291439               | -0.638543 | -1.212448 |
| 20            | 19            | 0           | 2.172074                | 1.530741  | 1.775707  |
| 21            | 53            | 0           | 1.200161                | -1.959976 | 1.374080  |
| 22            | 6             | 0           | -0.739348               | 2.276651  | 1.803765  |
| 23            | 8             | 0           | -0.177890               | 1.722895  | 2.831676  |
| 24            | 8             | 0           | -2.034987               | 2.307779  | 1.711577  |
| 25            | 19            | 0           | -2.110632               | -0.070398 | 2.789877  |
| 26            | 19            | 0           | -2.123781               | 3.106153  | -0.710346 |
| 27            | 8             | 0           | -0.004185               | 2.760426  | 0.833432  |
| 28            | 6             | 0           | 1.919424                | 2.848619  | -1.921538 |
| 29            | 1             | 0           | 1.283022                | 2.580874  | -2.770365 |
| 30            | 1             | 0           | 1.270387                | 3.150474  | -1.092255 |
| 31            | 1             | 0           | 2.521624                | 3.716138  | -2.207206 |

Zero-point correction= 0.197811 (Hartree/Particle)  
 Thermal correction to Energy= 0.224555

Thermal correction to Enthalpy= 0.225499  
 Thermal correction to Gibbs Free Energy= 0.133792  
 Sum of electronic and zero-point Energies= -2638.077331  
 Sum of electronic and thermal Energies= -2638.050586  
 Sum of electronic and thermal Enthalpies= -2638.049642  
 Sum of electronic and thermal Free Energies= -2638.141349

M06-D3/6-311++G(d,p)-LANL2DZ(SMD)//B3LYP-D3/6-31G(d,p)-LANL2DZ(SMD) energy in DMAc solvent = -2637.9559024

**33 (M06-D3/6-311++G(d,p)-LANL2DZ(SMD)//B3LYP-D3/6-31G(d,p)-LANL2DZ(SMD))**

| Center Number | Atomic Number | Atomic Type | Coordinates (Angstroms) |           |           |
|---------------|---------------|-------------|-------------------------|-----------|-----------|
|               |               |             | X                       | Y         | Z         |
| 1             | 6             | 0           | -3.061098               | 2.167868  | 0.127823  |
| 2             | 6             | 0           | -3.223091               | 3.555806  | 0.264816  |
| 3             | 6             | 0           | -4.424823               | 4.125973  | -0.172046 |
| 4             | 6             | 0           | -5.434656               | 3.333661  | -0.720271 |
| 5             | 6             | 0           | -5.248566               | 1.956873  | -0.848128 |
| 6             | 6             | 0           | -4.056483               | 1.347986  | -0.433614 |
| 7             | 1             | 0           | -4.567605               | 5.198834  | -0.071988 |
| 8             | 1             | 0           | -6.365092               | 3.787715  | -1.048932 |
| 9             | 1             | 0           | -6.029984               | 1.339763  | -1.283721 |
| 10            | 8             | 0           | -1.833292               | 1.656162  | 0.523219  |
| 11            | 6             | 0           | -1.833212               | 0.662771  | 1.561926  |
| 12            | 1             | 0           | -2.685227               | 0.818945  | 2.237409  |
| 13            | 46            | 0           | -1.940799               | -1.147279 | 0.695674  |
| 14            | 6             | 0           | -2.114886               | 4.384363  | 0.862318  |
| 15            | 1             | 0           | -2.430500               | 5.423246  | 0.991318  |
| 16            | 1             | 0           | -1.806405               | 3.990754  | 1.836941  |
| 17            | 1             | 0           | -1.222059               | 4.377263  | 0.224803  |
| 18            | 1             | 0           | -0.876674               | 0.744690  | 2.075251  |
| 19            | 6             | 0           | 0.721183                | -1.906788 | -2.100841 |
| 20            | 8             | 0           | -0.620391               | -1.692198 | -2.167032 |
| 21            | 8             | 0           | 1.144046                | -2.961096 | -1.531920 |
| 22            | 6             | 0           | -3.854812               | -0.131873 | -0.628749 |
| 23            | 1             | 0           | -2.978452               | -0.346024 | -1.256120 |
| 24            | 1             | 0           | -3.830071               | -0.676306 | 0.354216  |
| 25            | 1             | 0           | -4.705652               | -0.598021 | -1.129990 |
| 26            | 6             | 0           | -3.159418               | -3.494442 | -0.954956 |
| 27            | 1             | 0           | -3.911018               | -3.653153 | -0.161009 |
| 28            | 1             | 0           | -3.039222               | -4.463600 | -1.473376 |
| 29            | 8             | 0           | -1.934635               | -3.030132 | -0.449995 |
| 30            | 1             | 0           | -3.617057               | -2.805882 | -1.689356 |
| 31            | 1             | 0           | -1.124273               | -2.337459 | -1.531974 |
| 32            | 6             | 0           | 0.935055                | -1.282365 | 1.414441  |
| 33            | 8             | 0           | 1.046675                | -0.173766 | 0.776510  |
| 34            | 8             | 0           | -0.250741               | -1.798728 | 1.696328  |



|    |    |   |          |           |           |
|----|----|---|----------|-----------|-----------|
| 35 | 19 | 0 | 0.242686 | 1.090693  | -1.353686 |
| 36 | 53 | 0 | 4.064575 | 2.190570  | -0.495750 |
| 37 | 19 | 0 | 0.188554 | -4.182247 | 0.599912  |
| 38 | 8  | 0 | 1.966060 | -1.932951 | 1.817824  |
| 39 | 8  | 0 | 1.450641 | -0.998026 | -2.597625 |
| 40 | 19 | 0 | 2.781922 | 0.698324  | 2.566477  |
| 41 | 19 | 0 | 3.303971 | -1.554098 | -0.685044 |

---

|                                              |                             |
|----------------------------------------------|-----------------------------|
| Zero-point correction=                       | 0.266339 (Hartree/Particle) |
| Thermal correction to Energy=                | 0.300409                    |
| Thermal correction to Enthalpy=              | 0.301354                    |
| Thermal correction to Gibbs Free Energy=     | 0.194815                    |
| Sum of electronic and zero-point Energies=   | -3606.146569                |
| Sum of electronic and thermal Energies=      | -3606.112499                |
| Sum of electronic and thermal Enthalpies=    | -3606.111555                |
| Sum of electronic and thermal Free Energies= | -3606.218093                |

M06-D3/6-311++G(d,p)-LANL2DZ(SMD)//B3LYP-D3/6-31G(d,p)-LANL2DZ(SMD) energy in DMAc solvent = -3606.0407755

### 34-TS (M06-D3/6-311++G(d,p)-LANL2DZ(SMD)//B3LYP-D3/6-31G(d,p)-LANL2DZ(SMD))

---

| Center Number | Atomic Number | Atomic Type | Coordinates (Angstroms) |           |           |
|---------------|---------------|-------------|-------------------------|-----------|-----------|
|               |               |             | X                       | Y         | Z         |
| 1             | 6             | 0           | 3.583533                | -1.766675 | -0.097642 |
| 2             | 6             | 0           | 4.369141                | -2.642925 | 0.675207  |
| 3             | 6             | 0           | 5.647842                | -2.967951 | 0.203890  |
| 4             | 6             | 0           | 6.126752                | -2.443422 | -0.996860 |
| 5             | 6             | 0           | 5.319348                | -1.595592 | -1.755536 |
| 6             | 6             | 0           | 4.031658                | -1.246709 | -1.325237 |
| 7             | 1             | 0           | 6.266361                | -3.646935 | 0.785739  |
| 8             | 1             | 0           | 7.122387                | -2.703148 | -1.345849 |
| 9             | 1             | 0           | 5.684868                | -1.195411 | -2.698103 |
| 10            | 8             | 0           | 2.301884                | -1.454219 | 0.332327  |
| 11            | 6             | 0           | 2.215060                | -0.524856 | 1.437312  |
| 12            | 1             | 0           | 3.123883                | -0.571425 | 2.039062  |
| 13            | 46            | 0           | 1.802022                | 1.348559  | 0.756254  |
| 14            | 6             | 0           | 3.848957                | -3.234066 | 1.963144  |
| 15            | 1             | 0           | 4.310596                | -4.207563 | 2.153643  |
| 16            | 1             | 0           | 4.072428                | -2.591923 | 2.823634  |
| 17            | 1             | 0           | 2.763094                | -3.361871 | 1.931106  |
| 18            | 1             | 0           | 1.326484                | -0.803460 | 2.007615  |
| 19            | 6             | 0           | -0.797377               | 1.990090  | -2.044824 |
| 20            | 8             | 0           | 0.569976                | 1.956696  | -2.177980 |
| 21            | 8             | 0           | -1.327448               | 3.034440  | -1.565387 |
| 22            | 6             | 0           | 3.144711                | -0.376647 | -2.179641 |
| 23            | 1             | 0           | 2.453429                | -0.986188 | -2.779085 |
| 24            | 1             | 0           | 2.548341                | 0.319575  | -1.584472 |

|    |    |   |           |           |           |
|----|----|---|-----------|-----------|-----------|
| 25 | 1  | 0 | 3.738858  | 0.209273  | -2.887330 |
| 26 | 6  | 0 | 3.057592  | 3.157988  | 0.041532  |
| 27 | 1  | 0 | 3.600675  | 3.667859  | 0.848163  |
| 28 | 1  | 0 | 3.672940  | 2.910753  | -0.834080 |
| 29 | 8  | 0 | 1.800640  | 3.442075  | -0.134650 |
| 30 | 1  | 0 | 3.385416  | 1.712891  | 0.722614  |
| 31 | 1  | 0 | 0.961083  | 2.664788  | -1.619916 |
| 32 | 6  | 0 | -1.188020 | 0.468034  | 1.440348  |
| 33 | 8  | 0 | -0.960764 | -0.735465 | 1.794048  |
| 34 | 8  | 0 | -0.295111 | 1.127678  | 0.716283  |
| 35 | 19 | 0 | -0.191818 | -1.087641 | -1.007177 |
| 36 | 53 | 0 | -4.021576 | -2.206934 | -0.750928 |
| 37 | 19 | 0 | -0.765122 | 3.697226  | 0.952839  |
| 38 | 8  | 0 | -2.296291 | 1.087706  | 1.683556  |
| 39 | 8  | 0 | -1.393453 | 0.944999  | -2.423089 |
| 40 | 19 | 0 | -3.344248 | -1.172514 | 2.727672  |
| 41 | 19 | 0 | -3.495178 | 1.477754  | -0.806086 |

---

|                                              |                             |
|----------------------------------------------|-----------------------------|
| Zero-point correction=                       | 0.262516 (Hartree/Particle) |
| Thermal correction to Energy=                | 0.296943                    |
| Thermal correction to Enthalpy=              | 0.297887                    |
| Thermal correction to Gibbs Free Energy=     | 0.189005                    |
| Sum of electronic and zero-point Energies=   | -3606.128267                |
| Sum of electronic and thermal Energies=      | -3606.093840                |
| Sum of electronic and thermal Enthalpies=    | -3606.092896                |
| Sum of electronic and thermal Free Energies= | -3606.201777                |

M06-D3/6-311++G(d,p)-LANL2DZ(SMD)//B3LYP-D3/6-31G(d,p)-LANL2DZ(SMD) energy in DMAc solvent = -3606.0237406

### 39 (M06-D3/6-311++G(d,p)-LANL2DZ(SMD)//B3LYP-D3/6-31G(d,p)-LANL2DZ(SMD))

---

| Center<br>Number | Atomic<br>Number | Atomic<br>Type | Coordinates (Angstroms) |           |           |
|------------------|------------------|----------------|-------------------------|-----------|-----------|
|                  |                  |                | X                       | Y         | Z         |
| 1                | 46               | 0              | 0.863859                | 1.152994  | 1.101340  |
| 2                | 6                | 0              | 4.282973                | -0.821424 | -0.067950 |
| 3                | 6                | 0              | 5.355876                | 0.069849  | 0.094380  |
| 4                | 6                | 0              | 6.654650                | -0.452225 | 0.002573  |
| 5                | 6                | 0              | 6.868012                | -1.808551 | -0.244676 |
| 6                | 6                | 0              | 5.780603                | -2.670240 | -0.413814 |
| 7                | 6                | 0              | 4.468820                | -2.189629 | -0.329289 |
| 8                | 1                | 0              | 7.502366                | 0.218620  | 0.121512  |
| 9                | 1                | 0              | 7.881457                | -2.194852 | -0.311806 |
| 10               | 1                | 0              | 5.947572                | -3.726001 | -0.613385 |
| 11               | 8                | 0              | 2.982175                | -0.338425 | -0.045265 |
| 12               | 6                | 0              | 2.400596                | -0.134822 | 1.271004  |
| 13               | 1                | 0              | 2.027730                | -1.092893 | 1.652720  |
| 14               | 1                | 0              | 3.161545                | 0.280200  | 1.945144  |

|    |    |   |           |           |           |
|----|----|---|-----------|-----------|-----------|
| 15 | 6  | 0 | 5.117543  | 1.536952  | 0.357198  |
| 16 | 1  | 0 | 5.881675  | 2.147864  | -0.134720 |
| 17 | 1  | 0 | 5.171387  | 1.758615  | 1.430923  |
| 18 | 6  | 0 | 3.272774  | -3.084659 | -0.539490 |
| 19 | 1  | 0 | 2.549485  | -2.990066 | 0.276828  |
| 20 | 1  | 0 | 2.741015  | -2.826017 | -1.464013 |
| 21 | 1  | 0 | 3.576248  | -4.133079 | -0.611002 |
| 22 | 1  | 0 | 4.130805  | 1.857069  | 0.012423  |
| 23 | 6  | 0 | 0.490970  | 3.077352  | -0.412530 |
| 24 | 8  | 0 | -0.439428 | 2.873626  | 0.492429  |
| 25 | 8  | 0 | 1.720346  | 2.730946  | -0.033674 |
| 26 | 8  | 0 | 0.236658  | 3.446952  | -1.589786 |
| 27 | 19 | 0 | 1.517540  | 0.677249  | -2.028074 |
| 28 | 6  | 0 | -0.806292 | -1.055484 | 0.342902  |
| 29 | 8  | 0 | -0.430399 | -0.437989 | 1.457626  |
| 30 | 8  | 0 | -1.353575 | -2.202910 | 0.482673  |
| 31 | 19 | 0 | -2.274894 | 1.913867  | -1.050544 |
| 32 | 53 | 0 | -4.962181 | -0.366392 | -0.156069 |
| 33 | 19 | 0 | -2.611495 | -1.353638 | 2.656015  |
| 34 | 8  | 0 | -0.676192 | -0.489032 | -0.814958 |
| 35 | 19 | 0 | -2.260046 | -2.415712 | -1.927333 |

---

|                                              |                             |
|----------------------------------------------|-----------------------------|
| Zero-point correction=                       | 0.213290 (Hartree/Particle) |
| Thermal correction to Energy=                | 0.244156                    |
| Thermal correction to Enthalpy=              | 0.245100                    |
| Thermal correction to Gibbs Free Energy=     | 0.142677                    |
| Sum of electronic and zero-point Energies=   | -3490.433149                |
| Sum of electronic and thermal Energies=      | -3490.402283                |
| Sum of electronic and thermal Enthalpies=    | -3490.401339                |
| Sum of electronic and thermal Free Energies= | -3490.503762                |

M06-D3/6-311++G(d,p)-LANL2DZ(SMD)//B3LYP-D3/6-31G(d,p)-LANL2DZ(SMD) energy in DMAc solvent = -3490.3148002

#### 40-TS (M06-D3/6-311++G(d,p)-LANL2DZ(SMD)//B3LYP-D3/6-31G(d,p)-LANL2DZ(SMD))

---

| Center Number | Atomic Number | Atomic Type | Coordinates (Angstroms) |           |           |
|---------------|---------------|-------------|-------------------------|-----------|-----------|
|               |               |             | X                       | Y         | Z         |
| 1             | 46            | 0           | -1.142123               | -0.727636 | 1.114980  |
| 2             | 6             | 0           | -3.984306               | 0.986239  | 0.266079  |
| 3             | 6             | 0           | -4.347234               | -0.304184 | 0.713562  |
| 4             | 6             | 0           | -5.679243               | -0.702634 | 0.492903  |
| 5             | 6             | 0           | -6.603758               | 0.127977  | -0.133422 |
| 6             | 6             | 0           | -6.209748               | 1.394264  | -0.575272 |
| 7             | 6             | 0           | -4.898854               | 1.837981  | -0.388681 |
| 8             | 1             | 0           | -5.981131               | -1.694145 | 0.821530  |
| 9             | 1             | 0           | -7.626959               | -0.207605 | -0.278249 |
| 10            | 1             | 0           | -6.924785               | 2.049835  | -1.065895 |

|    |    |   |           |           |           |
|----|----|---|-----------|-----------|-----------|
| 11 | 8  | 0 | -2.701872 | 1.492244  | 0.345267  |
| 12 | 6  | 0 | -1.856298 | 1.129408  | 1.433377  |
| 13 | 1  | 0 | -1.021351 | 1.832806  | 1.410314  |
| 14 | 1  | 0 | -2.404129 | 1.192903  | 2.381780  |
| 15 | 6  | 0 | -3.366564 | -1.285492 | 1.286100  |
| 16 | 1  | 0 | -3.826091 | -2.275074 | 1.390992  |
| 17 | 1  | 0 | -3.045653 | -1.038863 | 2.308097  |
| 18 | 6  | 0 | -4.447031 | 3.192172  | -0.875746 |
| 19 | 1  | 0 | -3.995913 | 3.778153  | -0.067574 |
| 20 | 1  | 0 | -3.683471 | 3.105499  | -1.659348 |
| 21 | 1  | 0 | -5.287643 | 3.758014  | -1.286893 |
| 22 | 1  | 0 | -2.681466 | -1.703362 | 0.243213  |
| 23 | 6  | 0 | -1.095035 | -2.635630 | -0.952027 |
| 24 | 8  | 0 | -0.543719 | -2.731107 | 0.235810  |
| 25 | 8  | 0 | -2.350548 | -2.228929 | -1.020181 |
| 26 | 8  | 0 | -0.434433 | -2.847690 | -2.013516 |
| 27 | 19 | 0 | -1.547434 | 0.049330  | -2.222773 |
| 28 | 6  | 0 | 1.029383  | 0.925316  | 0.050903  |
| 29 | 8  | 0 | 0.827940  | 0.042566  | 1.032934  |
| 30 | 8  | 0 | 1.493663  | 2.073168  | 0.361328  |
| 31 | 19 | 0 | 1.848346  | -2.058069 | -0.707795 |
| 32 | 53 | 0 | 4.997027  | -0.049889 | -0.043534 |
| 33 | 19 | 0 | 2.567675  | 1.209452  | 2.622398  |
| 34 | 8  | 0 | 0.816280  | 0.570420  | -1.170108 |
| 35 | 19 | 0 | 2.713911  | 2.291884  | -1.968604 |

-----

Zero-point correction= 0.209340 (Hartree/Particle)

Thermal correction to Energy= 0.238789

Thermal correction to Enthalpy= 0.239734

Thermal correction to Gibbs Free Energy= 0.142604

Sum of electronic and zero-point Energies= -3490.412846

Sum of electronic and thermal Energies= -3490.383397

Sum of electronic and thermal Enthalpies= -3490.382452

Sum of electronic and thermal Free Energies= -3490.479582

M06-D3/6-311++G(d,p)-LANL2DZ(SMD)//B3LYP-D3/6-31G(d,p)-LANL2DZ(SMD) energy in DMAc solvent = -3490.2944896

**66 (M06-D3/6-311++G(d,p)-LANL2DZ(SMD)//B3LYP-D3/6-31G(d,p)-LANL2DZ(SMD))**

-----

| Center<br>Number | Atomic<br>Number | Atomic<br>Type | Coordinates (Angstroms) |           |           |
|------------------|------------------|----------------|-------------------------|-----------|-----------|
|                  |                  |                | X                       | Y         | Z         |
| 1                | 6                | 0              | -3.551875               | 0.383647  | 0.309741  |
| 2                | 6                | 0              | -3.453508               | -0.419680 | 1.476150  |
| 3                | 6                | 0              | -3.596402               | -1.804056 | 1.325103  |
| 4                | 6                | 0              | -3.846185               | -2.365152 | 0.073154  |
| 5                | 6                | 0              | -3.960081               | -1.558739 | -1.061382 |
| 6                | 6                | 0              | -3.827670               | -0.170326 | -0.969894 |

|    |    |   |           |           |           |
|----|----|---|-----------|-----------|-----------|
| 7  | 1  | 0 | -3.520264 | -2.440450 | 2.202056  |
| 8  | 1  | 0 | -3.956733 | -3.441513 | -0.020586 |
| 9  | 1  | 0 | -4.168283 | -2.007241 | -2.028436 |
| 10 | 8  | 0 | -3.615260 | 1.785040  | 0.461889  |
| 11 | 6  | 0 | -2.293080 | 2.289357  | 0.298808  |
| 12 | 1  | 0 | -1.947814 | 2.785121  | 1.211594  |
| 13 | 46 | 0 | -1.203620 | 0.625323  | 0.003468  |
| 14 | 6  | 0 | -3.307011 | 0.213223  | 2.836458  |
| 15 | 1  | 0 | -3.005302 | -0.532393 | 3.577002  |
| 16 | 1  | 0 | -2.573096 | 1.022194  | 2.840752  |
| 17 | 1  | 0 | -4.263621 | 0.641307  | 3.160973  |
| 18 | 1  | 0 | -2.220352 | 2.930404  | -0.585348 |
| 19 | 53 | 0 | 1.047771  | 2.183793  | -0.243204 |
| 20 | 19 | 0 | 2.684115  | -0.494829 | -2.189232 |
| 21 | 53 | 0 | -0.015051 | -2.071941 | -0.358247 |
| 22 | 6  | 0 | 5.083124  | -0.476888 | 0.586122  |
| 23 | 8  | 0 | 4.075254  | -0.835008 | -0.114404 |
| 24 | 8  | 0 | 5.049842  | -0.235264 | 1.819533  |
| 25 | 6  | 0 | 6.405294  | -0.318211 | -0.166217 |
| 26 | 1  | 0 | 7.245060  | -0.174357 | 0.517639  |
| 27 | 1  | 0 | 6.589167  | -1.194452 | -0.796553 |
| 28 | 1  | 0 | 6.339107  | 0.552315  | -0.830384 |
| 29 | 19 | 0 | 2.410314  | -0.584288 | 2.041565  |
| 30 | 6  | 0 | -4.053216 | 0.733103  | -2.154886 |
| 31 | 1  | 0 | -4.932725 | 1.366816  | -1.991525 |
| 32 | 1  | 0 | -3.204377 | 1.400699  | -2.327180 |
| 33 | 1  | 0 | -4.217590 | 0.145997  | -3.061992 |

-----  
Zero-point correction= 0.229445 (Hartree/Particle)

Thermal correction to Energy= 0.256295

Thermal correction to Enthalpy= 0.257239

Thermal correction to Gibbs Free Energy= 0.161795

Sum of electronic and zero-point Energies= -2002.734648

Sum of electronic and thermal Energies= -2002.707798

Sum of electronic and thermal Enthalpies= -2002.706854

Sum of electronic and thermal Free Energies= -2002.802298

M06-D3/6-311++G(d,p)-LANL2DZ(SMD)//B3LYP-D3/6-31G(d,p)-LANL2DZ(SMD) energy in DMAc solvent = -2002.6153078

### 68 (M06-D3/6-311++G(d,p)-LANL2DZ(SMD)//B3LYP-D3/6-31G(d,p)-LANL2DZ(SMD))

-----

| Center<br>Number | Atomic<br>Number | Atomic<br>Type | Coordinates (Angstroms) |           |           |
|------------------|------------------|----------------|-------------------------|-----------|-----------|
|                  |                  |                | X                       | Y         | Z         |
| 1                | 46               | 0              | 0.318444                | 0.835825  | 0.478694  |
| 2                | 6                | 0              | -3.262537               | -0.562723 | -0.169918 |
| 3                | 6                | 0              | -3.652892               | -0.376896 | 1.164498  |
| 4                | 6                | 0              | -5.021497               | -0.477988 | 1.453427  |

-----

|    |    |   |           |           |           |
|----|----|---|-----------|-----------|-----------|
| 5  | 6  | 0 | -5.952122 | -0.755971 | 0.451743  |
| 6  | 6  | 0 | -5.528777 | -0.940718 | -0.865381 |
| 7  | 6  | 0 | -4.172271 | -0.845293 | -1.200194 |
| 8  | 1  | 0 | -5.352009 | -0.339390 | 2.479531  |
| 9  | 1  | 0 | -7.007717 | -0.830304 | 0.697880  |
| 10 | 1  | 0 | -6.252657 | -1.155864 | -1.647128 |
| 11 | 8  | 0 | -1.910302 | -0.522579 | -0.524557 |
| 12 | 6  | 0 | -1.317583 | 0.753151  | -0.678718 |
| 13 | 1  | 0 | -0.940889 | 0.858830  | -1.701410 |
| 14 | 1  | 0 | -2.010713 | 1.554822  | -0.409589 |
| 15 | 6  | 0 | -2.643763 | -0.083324 | 2.243560  |
| 16 | 1  | 0 | -3.104436 | -0.153415 | 3.233057  |
| 17 | 1  | 0 | -2.230532 | 0.927428  | 2.138760  |
| 18 | 6  | 0 | -3.686214 | -1.051447 | -2.612929 |
| 19 | 1  | 0 | -3.002737 | -0.255353 | -2.924805 |
| 20 | 1  | 0 | -3.143578 | -2.000208 | -2.715208 |
| 21 | 1  | 0 | -4.526238 | -1.077282 | -3.312482 |
| 22 | 1  | 0 | -1.795926 | -0.771938 | 2.195817  |
| 23 | 6  | 0 | 1.563636  | -1.084969 | 1.830418  |
| 24 | 8  | 0 | 2.221543  | -0.009518 | 1.719323  |
| 25 | 8  | 0 | 0.388980  | -1.187027 | 1.320178  |
| 26 | 6  | 0 | 2.124004  | -2.283916 | 2.550202  |
| 27 | 1  | 0 | 1.444325  | -2.572757 | 3.358506  |
| 28 | 1  | 0 | 2.184692  | -3.126064 | 1.852757  |
| 29 | 1  | 0 | 3.111627  | -2.069559 | 2.961276  |
| 30 | 19 | 0 | 3.415312  | 0.291876  | -0.759473 |
| 31 | 53 | 0 | 0.880058  | 3.350400  | -0.382266 |
| 32 | 6  | 0 | 2.848746  | -3.186771 | -0.781111 |
| 33 | 8  | 0 | 2.069230  | -4.127445 | -0.478093 |
| 34 | 8  | 0 | 2.487977  | -2.063424 | -1.272365 |
| 35 | 6  | 0 | 4.343586  | -3.364233 | -0.497139 |
| 36 | 1  | 0 | 4.598039  | -2.825860 | 0.425383  |
| 37 | 1  | 0 | 4.599438  | -4.416622 | -0.352863 |
| 38 | 1  | 0 | 4.949427  | -2.946145 | -1.307571 |
| 39 | 19 | 0 | -0.190308 | -2.711505 | -0.828864 |

-----

|                                              |                             |
|----------------------------------------------|-----------------------------|
| Zero-point correction=                       | 0.281654 (Hartree/Particle) |
| Thermal correction to Energy=                | 0.310676                    |
| Thermal correction to Enthalpy=              | 0.311620                    |
| Thermal correction to Gibbs Free Energy=     | 0.216420                    |
| Sum of electronic and zero-point Energies=   | -2219.776607                |
| Sum of electronic and thermal Energies=      | -2219.747586                |
| Sum of electronic and thermal Enthalpies=    | -2219.746642                |
| Sum of electronic and thermal Free Energies= | -2219.841841                |

M06-D3/6-311++G(d,p)-LANL2DZ(SMD)//B3LYP-D3/6-31G(d,p)-LANL2DZ(SMD) energy in DMAc solvent = -2219.6724306

**69-TS (M06-D3/6-311++G(d,p)-LANL2DZ(SMD)//B3LYP-D3/6-31G(d,p)-LANL2DZ(SMD))**

| Center<br>Number | Atomic<br>Number | Atomic<br>Type | Coordinates (Angstroms) |           |           |
|------------------|------------------|----------------|-------------------------|-----------|-----------|
|                  |                  |                | X                       | Y         | Z         |
| 1                | 46               | 0              | 0.076123                | -1.217788 | 0.753419  |
| 2                | 6                | 0              | 3.216002                | -0.386246 | -0.341132 |
| 3                | 6                | 0              | 3.119878                | -0.129452 | 1.044403  |
| 4                | 6                | 0              | 4.084214                | 0.736530  | 1.597605  |
| 5                | 6                | 0              | 5.093497                | 1.301610  | 0.826322  |
| 6                | 6                | 0              | 5.159793                | 1.024694  | -0.543182 |
| 7                | 6                | 0              | 4.224108                | 0.184639  | -1.147971 |
| 8                | 1                | 0              | 4.025363                | 0.960466  | 2.659651  |
| 9                | 1                | 0              | 5.828790                | 1.955418  | 1.286781  |
| 10               | 1                | 0              | 5.947184                | 1.461748  | -1.151704 |
| 11               | 8                | 0              | 2.286155                | -1.121804 | -1.045236 |
| 12               | 6                | 0              | 1.497417                | -2.104851 | -0.409483 |
| 13               | 1                | 0              | 1.017093                | -2.663783 | -1.210920 |
| 14               | 1                | 0              | 2.106965                | -2.762402 | 0.219040  |
| 15               | 6                | 0              | 1.983004                | -0.608438 | 1.889702  |
| 16               | 1                | 0              | 2.036990                | -0.160020 | 2.888502  |
| 17               | 1                | 0              | 1.974443                | -1.684729 | 2.078202  |
| 18               | 6                | 0              | 4.264199                | -0.108429 | -2.627049 |
| 19               | 1                | 0              | 4.284379                | -1.186114 | -2.821787 |
| 20               | 1                | 0              | 3.379851                | 0.283830  | -3.145244 |
| 21               | 1                | 0              | 5.147625                | 0.343873  | -3.085755 |
| 22               | 1                | 0              | 0.995081                | 0.363552  | 1.661252  |
| 23               | 6                | 0              | -0.799868               | 1.331555  | 2.081693  |
| 24               | 8                | 0              | -1.359546               | 0.209992  | 1.930759  |
| 25               | 8                | 0              | 0.436989                | 1.536892  | 1.790653  |
| 26               | 6                | 0              | -1.588156               | 2.515942  | 2.581197  |
| 27               | 1                | 0              | -0.962347               | 3.160981  | 3.201364  |
| 28               | 1                | 0              | -1.907854               | 3.091869  | 1.705092  |
| 29               | 1                | 0              | -2.467443               | 2.194258  | 3.144068  |
| 30               | 19               | 0              | -3.697090               | 0.602751  | 0.326513  |
| 31               | 53               | 0              | -2.000315               | -2.323480 | -0.710379 |
| 32               | 6                | 0              | -1.833709               | 3.361340  | -1.256098 |
| 33               | 8                | 0              | -0.725126               | 3.767706  | -1.683127 |
| 34               | 8                | 0              | -2.041803               | 2.201570  | -0.753989 |
| 35               | 6                | 0              | -3.045237               | 4.292179  | -1.320002 |
| 36               | 1                | 0              | -3.434271               | 4.460187  | -0.309018 |
| 37               | 1                | 0              | -2.793115               | 5.253981  | -1.772495 |
| 38               | 1                | 0              | -3.844434               | 3.818688  | -1.901773 |
| 39               | 19               | 0              | 0.547435                | 1.452489  | -1.201300 |

Zero-point correction= 0.276950 (Hartree/Particle)  
 Thermal correction to Energy= 0.304994  
 Thermal correction to Enthalpy= 0.305938  
 Thermal correction to Gibbs Free Energy= 0.213210

Sum of electronic and zero-point Energies= -2219.741706  
 Sum of electronic and thermal Energies= -2219.713662  
 Sum of electronic and thermal Enthalpies= -2219.712718  
 Sum of electronic and thermal Free Energies= -2219.805446

M06-D3/6-311++G(d,p)-LANL2DZ(SMD)//B3LYP-D3/6-31G(d,p)-LANL2DZ(SMD) energy in DMAc solvent = -2219.6348756

**72(M06-D3/6-311++G(d,p)-LANL2DZ(SMD)//B3LYP-D3/6-31G(d,p)-LANL2DZ(SMD))**

| Center Number | Atomic Number | Atomic Type | Coordinates (Angstroms) |           |           |
|---------------|---------------|-------------|-------------------------|-----------|-----------|
|               |               |             | X                       | Y         | Z         |
| 1             | 6             | 0           | -2.925757               | -0.938034 | 0.996870  |
| 2             | 6             | 0           | -3.982665               | -1.358344 | 0.166796  |
| 3             | 6             | 0           | -4.855385               | -0.372391 | -0.321148 |
| 4             | 6             | 0           | -4.689894               | 0.972203  | 0.021884  |
| 5             | 6             | 0           | -3.645495               | 1.352742  | 0.868250  |
| 6             | 6             | 0           | -2.741072               | 0.406463  | 1.372844  |
| 7             | 1             | 0           | -5.680822               | -0.673268 | -0.961017 |
| 8             | 1             | 0           | -5.378043               | 1.719521  | -0.362330 |
| 9             | 1             | 0           | -3.514708               | 2.396442  | 1.135959  |
| 10            | 8             | 0           | -2.051126               | -1.892233 | 1.520344  |
| 11            | 6             | 0           | -1.143479               | -2.486471 | 0.626856  |
| 12            | 1             | 0           | -1.497129               | -2.518249 | -0.404198 |
| 13            | 46            | 0           | 0.467266                | -1.367248 | 0.939519  |
| 14            | 6             | 0           | -4.193002               | -2.811400 | -0.184610 |
| 15            | 1             | 0           | -5.255332               | -3.010811 | -0.350724 |
| 16            | 1             | 0           | -3.660093               | -3.085499 | -1.102850 |
| 17            | 1             | 0           | -3.835991               | -3.473081 | 0.609251  |
| 18            | 1             | 0           | -0.858945               | -3.472161 | 1.014696  |
| 19            | 6             | 0           | 4.749023                | 0.767499  | 0.033770  |
| 20            | 8             | 0           | 4.338453                | -0.220196 | 0.738359  |
| 21            | 8             | 0           | 4.096795                | 1.807301  | -0.222855 |
| 22            | 6             | 0           | -1.608178               | 0.833038  | 2.267262  |
| 23            | 1             | 0           | -1.761383               | 0.503069  | 3.300912  |
| 24            | 1             | 0           | -0.652309               | 0.395359  | 1.941330  |
| 25            | 1             | 0           | -1.489503               | 1.918718  | 2.247671  |
| 26            | 6             | 0           | 2.259491                | 0.027700  | 3.112831  |
| 27            | 1             | 0           | 1.316497                | 0.299374  | 3.599081  |
| 28            | 1             | 0           | 3.024365                | 0.759283  | 3.405765  |
| 29            | 8             | 0           | 2.077181                | 0.029728  | 1.696793  |
| 30            | 1             | 0           | 2.567860                | -0.960779 | 3.481942  |
| 31            | 1             | 0           | 3.040675                | -0.081849 | 1.242072  |
| 32            | 53            | 0           | 1.216951                | -1.439729 | -1.682834 |
| 33            | 19            | 0           | 1.518717                | 2.262548  | 0.176427  |
| 34            | 6             | 0           | 6.151226                | 0.609904  | -0.549054 |
| 35            | 1             | 0           | 6.523522                | 1.556167  | -0.947928 |
| 36            | 1             | 0           | 6.841379                | 0.227436  | 0.209343  |



|    |    |   |           |           |           |
|----|----|---|-----------|-----------|-----------|
| 37 | 1  | 0 | 6.119939  | -0.126792 | -1.360939 |
| 38 | 19 | 0 | -1.890767 | 0.564763  | -2.167434 |
| 39 | 6  | 0 | -1.234916 | 3.563595  | -0.363384 |
| 40 | 8  | 0 | -0.873374 | 2.635209  | -1.166518 |
| 41 | 8  | 0 | -0.636512 | 3.875809  | 0.696576  |
| 42 | 6  | 0 | -2.478870 | 4.359231  | -0.770547 |
| 43 | 1  | 0 | -3.297299 | 3.683200  | -1.038518 |
| 44 | 1  | 0 | -2.807209 | 5.027730  | 0.028798  |
| 45 | 1  | 0 | -2.246621 | 4.956961  | -1.660170 |

---

|                                              |                             |
|----------------------------------------------|-----------------------------|
| Zero-point correction=                       | 0.333502 (Hartree/Particle) |
| Thermal correction to Energy=                | 0.366768                    |
| Thermal correction to Enthalpy=              | 0.367712                    |
| Thermal correction to Gibbs Free Energy=     | 0.261260                    |
| Sum of electronic and zero-point Energies=   | -2335.465646                |
| Sum of electronic and thermal Energies=      | -2335.432380                |
| Sum of electronic and thermal Enthalpies=    | -2335.431436                |
| Sum of electronic and thermal Free Energies= | -2335.537888                |

M06-D3/6-311++G(d,p)-LANL2DZ(SMD)//B3LYP-D3/6-31G(d,p)-LANL2DZ(SMD) energy in DMAc solvent = -2335.3722995

### 73-TS(M06-D3/6-311++G(d,p)-LANL2DZ(SMD)//B3LYP-D3/6-31G(d,p)-LANL2DZ(SMD))

---

| Center Number | Atomic Number | Atomic Type | Coordinates (Angstroms) |           |           |
|---------------|---------------|-------------|-------------------------|-----------|-----------|
|               |               |             | X                       | Y         | Z         |
| 1             | 6             | 0           | -3.173585               | -0.980061 | 0.867250  |
| 2             | 6             | 0           | -3.946876               | -1.644472 | -0.110332 |
| 3             | 6             | 0           | -4.811288               | -0.877821 | -0.905748 |
| 4             | 6             | 0           | -4.927814               | 0.503571  | -0.720085 |
| 5             | 6             | 0           | -4.167671               | 1.136586  | 0.267082  |
| 6             | 6             | 0           | -3.272075               | 0.411358  | 1.070629  |
| 7             | 1             | 0           | -5.415477               | -1.377581 | -1.658756 |
| 8             | 1             | 0           | -5.616459               | 1.079762  | -1.331816 |
| 9             | 1             | 0           | -4.259491               | 2.208608  | 0.419781  |
| 10            | 8             | 0           | -2.366958               | -1.715475 | 1.711023  |
| 11            | 6             | 0           | -1.155890               | -2.235184 | 1.172522  |
| 12            | 1             | 0           | -1.282189               | -2.526030 | 0.126683  |
| 13            | 46            | 0           | 0.432653                | -0.935311 | 1.151211  |
| 14            | 6             | 0           | -3.871396               | -3.141495 | -0.286069 |
| 15            | 1             | 0           | -4.818290               | -3.531246 | -0.670890 |
| 16            | 1             | 0           | -3.086994               | -3.425215 | -0.997658 |
| 17            | 1             | 0           | -3.646204               | -3.639932 | 0.660703  |
| 18            | 1             | 0           | -0.889721               | -3.102981 | 1.779142  |
| 19            | 6             | 0           | 4.789921                | -0.215325 | 0.143510  |
| 20            | 8             | 0           | 4.158951                | -0.744057 | 1.187316  |
| 21            | 8             | 0           | 4.463243                | 0.846875  | -0.377977 |
| 22            | 6             | 0           | -2.412688               | 1.124781  | 2.083754  |

|    |    |   |           |           |           |
|----|----|---|-----------|-----------|-----------|
| 23 | 1  | 0 | -2.077801 | 0.448824  | 2.871903  |
| 24 | 1  | 0 | -1.521961 | 1.535979  | 1.593358  |
| 25 | 1  | 0 | -2.956528 | 1.960748  | 2.534875  |
| 26 | 6  | 0 | 1.304688  | 0.489363  | 2.771615  |
| 27 | 1  | 0 | 0.506932  | 1.196919  | 3.021485  |
| 28 | 1  | 0 | 1.749075  | -0.049070 | 3.617045  |
| 29 | 8  | 0 | 2.014426  | 0.690962  | 1.713519  |
| 30 | 1  | 0 | 0.120110  | -0.885999 | 2.709569  |
| 31 | 1  | 0 | 3.365574  | -0.176509 | 1.427190  |
| 32 | 53 | 0 | 1.112230  | -1.371485 | -1.573010 |
| 33 | 19 | 0 | 2.160038  | 2.312258  | -0.476696 |
| 34 | 6  | 0 | 5.939101  | -1.061705 | -0.333099 |
| 35 | 1  | 0 | 6.492698  | -0.541466 | -1.114954 |
| 36 | 1  | 0 | 6.603433  | -1.302878 | 0.502024  |
| 37 | 1  | 0 | 5.549338  | -2.006801 | -0.726603 |
| 38 | 19 | 0 | -1.800765 | 0.756662  | -2.014117 |
| 39 | 6  | 0 | -0.556065 | 3.740955  | -0.254802 |
| 40 | 8  | 0 | -0.561350 | 2.583934  | -0.802053 |
| 41 | 8  | 0 | 0.472986  | 4.356232  | 0.117932  |
| 42 | 6  | 0 | -1.925566 | 4.384030  | -0.023307 |
| 43 | 1  | 0 | -2.439439 | 3.850821  | 0.784414  |
| 44 | 1  | 0 | -1.832445 | 5.436135  | 0.256543  |
| 45 | 1  | 0 | -2.547765 | 4.296164  | -0.920328 |

-----  
Zero-point correction= 0.329318 (Hartree/Particle)

Thermal correction to Energy= 0.362539

Thermal correction to Enthalpy= 0.363483

Thermal correction to Gibbs Free Energy= 0.257631

Sum of electronic and zero-point Energies= -2335.438216

Sum of electronic and thermal Energies= -2335.404995

Sum of electronic and thermal Enthalpies= -2335.404051

Sum of electronic and thermal Free Energies= -2335.509903

M06-D3/6-311++G(d,p)-LANL2DZ(SMD)//B3LYP-D3/6-31G(d,p)-LANL2DZ(SMD) energy in DMAc solvent = -2335.3412389
